# Supplementary material for: Gene Expression Profiles of Main Olfactory Epithelium in Adenylyl Cyclase 3 Knockout Mice
Source: Int J Mol Sci. 2015 Nov 30;16(12):28320–33. doi: 10.3390/ijms161226107 (PMC4691054; doi:10.3390/ijms161226107)
Supplement: Supplementary file 1 [file ijms-16-26107-s001.zip › ijms-97743-Tables S1-S5.xls]

## Sheet: Table S1
Supplemental Table S1 Differentially expressed genes that had greater than 2-fold fold change in expression levels between AC3-/- and AC3+/+ mice identified in the microarray hybridization.
Probe ID	Fold change	Gene ID	Symbol	Taxid
A_51_P108812	0.0001	20199	S100a5	10090
A_51_P184171	0.001	52020	Umodl1	10090
A_51_P172777	0.0011	320261	A330043J11Rik	10090
A_52_P668090	0.0011	70487	5730403I07Rik	10090
A_52_P359026	0.0015	333329	Cngb1	10090
A_52_P603038	0.0023	50914	Olig1	10090
A_51_P306308	0.0025	244484	Wdr17	10090
A_51_P228706	0.0026	99738	Kcnc4	10090
A_52_P86892	0.0028	234700	Nrn1l	10090
A_51_P520639	0.0029	328783	Mslnl	10090
A_52_P216820	0.0032	224055	Rtp2	10090
A_51_P149503	0.0034	208666	Diras1	10090
A_51_P245789	0.0039	76477	Pcolce2	10090
A_51_P358316	0.004	12652	Chga	10090
A_51_P426232	0.0041	18378	Omp	10090
A_51_P115953	0.0042	629147	Ctxn3	10090
A_51_P105000	0.0048	258019	Olfr212	10090
A_51_P305230	0.0048	15571	Elavl3	10090
A_51_P487062	0.0051	257882	Olfr1344	10090
A_51_P423948	0.0052	12789	Cnga2	10090
A_52_P58283	0.0055	16493	Kcna5	10090
A_51_P415958	0.0056	239766	Rtp1	10090
A_52_P174864	0.0057	433004	B830017H08Rik	10090
A_51_P194249	0.0062	56471	Stmn4	10090
A_51_P386562	0.0062	13592	Ebf2	10090
A_51_P178828	0.0066	17195	Mbl2	10090
A_51_P110289	0.0069	242384	Lingo2	10090
A_51_P149422	0.0069	64337	Gng13	10090
A_51_P140690	0.007	20262	Stmn3	10090
A_51_P186203	0.0071	13638	Efna3	10090
A_51_P319470	0.0076	258046	Olfr951	10090
A_52_P198885	0.0076	27411	Slc14a2	10090
A_51_P120875	0.0079	259036	Olfr713	10090
A_51_P257419	0.0079	16870	Lhx2	10090
A_51_P410859	0.0083	77375	9430085L16Rik	10090
A_51_P170090	0.0088	258792	Olfr1499	10090
A_52_P370392	0.009	60597	Mapk8ip2	10090
A_51_P317542	0.0101	76376	Slc24a2	10090
A_51_P504735	0.0108	258787	Olfr1248	10090
A_51_P492787	0.011	20274	Scn9a	10090
A_51_P407811	0.0113	57272	Olfr140	10090
A_51_P247421	0.0114	71864	1700026J04Rik	10090
A_52_P356965	0.0116	73748	Gadl1	10090
A_51_P461779	0.0117	269643	Ppp2r2c	10090
A_51_P274488	0.0118	18530	Pcdh8	10090
A_51_P484735	0.0119	170648	Olfr138	10090
A_51_P485862	0.012	13628	Eef1a2	10090
A_51_P407480	0.0122	17932	Myt1	10090
A_51_P426875	0.0122	68616	Gdpd3	10090
A_52_P132102	0.0122	319874
A_51_P128320	0.0123	17831	Muc2	10090
A_51_P420519	0.0126	258579	Olfr1018	10090
A_52_P31641	0.0128	330485	Tmem145	10090
A_51_P106591	0.013	78784	Celf3	10090
A_51_P362089	0.013	218763	Lrrc3b	10090
A_52_P181679	0.0131	258803	Olfr136	10090
A_52_P428599	0.0133	104183	Chi3l4	10090
A_52_P223626	0.0136	50913	Olig2	10090
A_51_P337110	0.0143	71146	Golga7b	10090
A_51_P221223	0.0148	20394	Scg5	10090
A_51_P379428	0.0151	20977	Syp	10090
A_51_P445422	0.0151	258591	Olfr695	10090
A_52_P463154	0.016	258196	Olfr309	10090
A_51_P157953	0.0161	67412	6330407J23Rik	10090
A_52_P382926	0.0166	269344	Ell3	10090
A_51_P120589	0.0167	259001	Olfr181	10090
A_51_P432380	0.0169	11803	Aplp1	10090
A_51_P471672	0.017	78245	Acbd7	10090
A_52_P28745	0.0171	214189	Scgn	10090
A_51_P420577	0.0172	258824	Olfr983	10090
A_51_P280040	0.0175	70753	6330415B21Rik	10090
A_51_P464420	0.0176	70844	4921508M14Rik	10090
A_51_P127247	0.0181	258879	Olfr330	10090
A_52_P114585	0.0183	258655	Olfr1112	10090
A_51_P497756	0.0186	258963	Olfr539	10090
A_52_P450934	0.0189	75552	Paqr9	10090
A_52_P564983	0.0191	277743	Fam131c	10090
A_51_P102459	0.0193	57340	Jph3	10090
A_52_P400249	0.0194	319764	A730046J19Rik	10090
A_51_P139370	0.02	258765	Olfr1110	10090
A_51_P145130	0.0204	545055	Cma2	10090
A_51_P388325	0.0204	12745	Clgn	10090
A_52_P138806	0.0206	242667	Dlgap3	10090
A_52_P101399	0.0209	243339	Tmem130	10090
A_51_P117115	0.0211	258962	Olfr53	10090
A_51_P360658	0.0214	258624	Olfr120	10090
A_52_P74344	0.0215	258995	Olfr176	10090
A_51_P411694	0.0217	107239	Carns1	10090
A_51_P511546	0.0217	104174	Gldc	10090
A_51_P207781	0.0219	258890	Olfr1297	10090
A_51_P161248	0.023	20255	Scg3	10090
A_51_P179056	0.023	258676	Olfr1424	10090
A_52_P442414	0.023	245038	Dclk3	10090
A_51_P310836	0.0231	258382	Olfr208	10090
A_52_P211150	0.0231	258925	Olfr20	10090
A_52_P487379	0.0236	258344	Olfr390	10090
A_52_P58494	0.0237	237858	Tusc5	10090
A_51_P251684	0.0243	259000	Olfr195	10090
A_51_P323518	0.0244	57754	Cend1	10090
A_51_P145132	0.0246	17227	Mcpt4	10090
A_51_P165027	0.0248	72135	Pygo1	10090
A_51_P305600	0.0251	29845	Olfr155	10090
A_51_P104802	0.0258	235402	Lingo1	10090
A_51_P252586	0.026	258288	Olfr1484	10090
A_51_P471038	0.0261	257899	Olfr1000	10090
A_51_P242622	0.0264	235379	Gldn	10090
A_51_P335801	0.0264	12307	Calb1	10090
A_52_P519620	0.0265	258505	Olfr97	10090
A_51_P307463	0.0267	101320	Dyrk4	10090
A_51_P108309	0.0268	258992	Olfr1494	10090
A_51_P203547	0.0268	75036	4930488B01Rik	10090
A_51_P169476	0.0273	17224	Mcpt1	10090
A_52_P672834	0.0274	76071	Jakmip1	10090
A_51_P333896	0.0276	258463	Olfr1393	10090
A_51_P179878	0.0277	72932
A_52_P406181	0.0277	192950	Nacad	10090
A_52_P482030	0.028	258468	Olfr1254	10090
A_51_P292957	0.0283	258404	Olfr1080	10090
A_51_P229483	0.0284	258993	Olfr206	10090
A_51_P191669	0.0287	12653	Chgb	10090
A_51_P339843	0.0287	17225	Mcpt2	10090
A_51_P121266	0.0291	58869	Pex5l	10090
A_52_P393669	0.0294	17232	Mcpt9	10090
A_51_P290065	0.0295	14432	Gap43	10090
A_52_P23604	0.0299	396184	Flrt1	10090
A_51_P520297	0.03	258485	Olfr724	10090
A_51_P140887	0.0301	53626	Insm1	10090
A_51_P185275	0.0306	258069	Olfr787	10090
A_51_P189943	0.0324	13508	Dscam	10090
A_51_P332839	0.0326	258755	Olfr672	10090
A_51_P375088	0.0328	66786	Olfr701	10090
A_51_P221100	0.033	241727	Snph	10090
A_52_P659779	0.0334	259003	Olfr172	10090
A_51_P413895	0.034	257662	Olfr1290	10090
A_51_P472393	0.034	74644	4930426D05Rik	10090
A_51_P500661	0.0342	328234	Rnf182	10090
A_52_P522849	0.0347	258667	Olfr816	10090
A_52_P483391	0.035	72258	Kcnk10	10090
A_52_P182298	0.0352	19773	Rln1	10090
A_52_P237973	0.0358	258959	Olfr170	10090
A_51_P318577	0.0363	73671	Sult6b1	10090
A_51_P427953	0.037	258550	Olfr869	10090
A_51_P144551	0.0372	50701	Elane	10090
A_51_P396225	0.0377	258807	Olfr910	10090
A_51_P250178	0.0378	18321	Olfr23	10090
A_51_P496741	0.0378	54631	Nphs1	10090
A_52_P589568	0.0378	329934	Foxo6	10090
A_51_P217227	0.0382	668212	Efr3b	10090
A_51_P259201	0.0384	258347	Olfr1123	10090
A_51_P190721	0.0386	257975	Olfr598	10090
A_51_P160143	0.0387	258967	Olfr1250	10090
A_51_P120917	0.0397	72413	Kcnmb2	10090
A_51_P379293	0.0397	93719	Ear6	10090
A_51_P388724	0.0403	18071	Nhlh1	10090
A_51_P347619	0.0409	73191	Fezf1	10090
A_51_P410991	0.0411	259030	Olfr1124	10090
A_52_P377454	0.0414	258691	Olfr1477	10090
A_51_P178612	0.0416	258998	Olfr177	10090
A_51_P222115	0.0418	258120	Olfr1463	10090
A_51_P402165	0.0419	24012	Rgs7	10090
A_52_P618947	0.0421	258629	Olfr1487	10090
A_51_P317460	0.0425	17523	Mpo	10090
A_51_P248395	0.0433	258178	Olfr180	10090
A_51_P310020	0.0438	258886	Olfr1299	10090
A_52_P137058	0.0443	76637	Zim2	10090
A_51_P346243	0.0446	14723	Gp1ba	10090
A_51_P454782	0.0452	116872	Serpinb7	10090
A_51_P218975	0.0455	238076	Kcns3	10090
A_51_P320606	0.0457	28078	Prl5a1	10090
A_51_P208160	0.0463	74087	Slc7a13	10090
A_52_P654720	0.0463	76022	Gon4l	10090
A_51_P433769	0.0467	218544	Sgtb	10090
A_51_P365844	0.047	258895	Olfr1216	10090
A_51_P216108	0.0474	238323	Rps6kl1	10090
A_51_P386625	0.0475	13861	Epx	10090
A_51_P350294	0.0476	105243	Slc9a3	10090
A_51_P312024	0.0482	258177	Olfr1222	10090
A_51_P101022	0.0485	258819	Olfr640	10090
A_51_P430071	0.0494	319190	Hist2h2be	10090
A_51_P426708	0.0501	258656	Olfr365	10090
A_51_P229957	0.0502	258964	Olfr541	10090
A_52_P457924	0.0502	258658	Olfr734	10090
A_51_P154115	0.0504	258927	Olfr481	10090
A_51_P162124	0.0505	72632	2700090O03Rik	10090
A_52_P430676	0.0506	229949	Ak5	10090
A_52_P157355	0.0507	258056	Olfr533	10090
A_51_P255473	0.0509	259002	Olfr173	10090
A_51_P355652	0.0512	258696	Olfr1448	10090
A_52_P440119	0.0513	73326	4932702P03Rik	10090
A_51_P416546	0.0514	13035	Ctsg	10090
A_51_P201400	0.0521	258806	Olfr912	10090
A_52_P533129	0.0521	27217	Mixl1	10090
A_51_P290826	0.0524	12310	Calca	10090
A_52_P107947	0.0526	320110	B230369F24Rik	10090
A_51_P240425	0.0532	258372	Olfr918	10090
A_51_P459215	0.0534	97455	C78859	10090
A_51_P133761	0.0537	210933	Bai3	10090
A_51_P276508	0.0539	258972	Olfr1239	10090
A_51_P214127	0.0541	12873	Cpa3	10090
A_51_P364210	0.0542	170813	Ms4a3	10090
A_51_P253857	0.0546	258826	Olfr27	10090
A_52_P625640	0.0546	94090	Trim9	10090
A_51_P511669	0.0549	258285	Olfr122	10090
A_52_P524953	0.0551	29846	Olfr156	10090
A_51_P330452	0.0553	259041	Olfr1414	10090
A_51_P143951	0.0562	11899	Astn1	10090
A_51_P430223	0.0574	56858	Olfr749	10090
A_52_P558843	0.0575	69352	Necab1	10090
A_51_P225309	0.0579	276865	Olfr1371	10090
A_51_P164998	0.0581	20257	Stmn2	10090
A_51_P122116	0.0585	258882	Olfr874	10090
A_51_P215828	0.0585	545156	Kalrn	10090
A_51_P257282	0.0589	70892	Ttll7	10090
A_51_P196113	0.0591	56527	Mast1	10090
A_52_P402928	0.0593	192194	Butr1	10090
A_51_P163953	0.0594	18197	Nsg2	10090
A_51_P258721	0.0596	26945	Tpsg1	10090
A_51_P498483	0.0597	242506	Frmd3	10090
A_51_P283359	0.0598	257663
A_52_P130787	0.06	16494	Kcna6	10090
A_52_P207132	0.0601	239318	Plcxd3	10090
A_52_P271085	0.0601	233836	Slc5a11	10090
A_51_P128621	0.0604	381654	C87414	10090
A_52_P157726	0.0612	53873	Ear7	10090
A_52_P452608	0.0613	258486	Olfr730	10090
A_52_P412585	0.0614	13586	Ear1	10090
A_51_P222993	0.0622	71691	Pnmal1	10090
A_51_P455338	0.0631	93726	Ear11	10090
A_51_P518542	0.0632	258500	Olfr944	10090
A_51_P316199	0.0638	117004	Olfr73	10090
A_51_P237668	0.0642	12069	Bex2	10090
A_52_P297765	0.0651	69627	Fam89a	10090
A_51_P328522	0.0655	258747	Olfr1106	10090
A_51_P345449	0.0661	258822	Olfr39	10090
A_52_P141387	0.0661	258454	Olfr1202	10090
A_51_P286348	0.0662	258375	Olfr794	10090
A_51_P506961	0.0667	56863	Cldn9	10090
A_51_P180423	0.067	12796	Camp	10090
A_51_P343189	0.067	243816	Gp6	10090
A_51_P389255	0.0671	258315	Olfr767	10090
A_51_P388048	0.0674	12936	Pcdha4	10090
A_51_P180773	0.0683	258843	Olfr1087	10090
A_51_P277006	0.0683	68947	Chst8	10090
A_51_P432288	0.0683	76072	Rnf183	10090
A_51_P452968	0.069	68307	Lrriq4	10090
A_52_P185014	0.0694	237387	Lrrc3	10090
A_51_P342436	0.0699	258533	Olfr1364	10090
A_51_P295237	0.07	237253	Lrp11	10090
A_52_P111145	0.07	242425	Gabbr2	10090
A_51_P248008	0.0703	258762	Olfr1109	10090
A_52_P85334	0.0704	258742	Olfr146	10090
A_52_P547696	0.0705	320539	9330159H11Rik	10090
A_51_P413059	0.071	17231	Mcpt8	10090
A_51_P406807	0.0711	269328	Muc15	10090
A_51_P282594	0.0712	68666	Svop	10090
A_51_P381381	0.0712	22152	Tubb3	10090
A_52_P676359	0.0716	14134	Fcnb	10090
A_51_P178705	0.0718	258363	Olfr1093	10090
A_52_P120813	0.0718	21684	Tectb	10090
A_52_P52946	0.0721	209601	4922501L14Rik	10090
A_52_P52946	0.0721	71845
A_52_P71645	0.0724	258635	Olfr1140	10090
A_52_P228377	0.073	77531	Anks1b	10090
A_52_P429450	0.0738	18054	Ngp	10090
A_52_P534583	0.0746	170812	Ahsp	10090
A_51_P318618	0.075	72074	Anks4b	10090
A_51_P494342	0.075	406217	Bex4	10090
A_51_P173858	0.0751	11784	Apba2	10090
A_51_P197274	0.0752	259010	Olfr393	10090
A_51_P231042	0.0765	93671	Cd163	10090
A_51_P247030	0.0766	328644
A_52_P459143	0.077	76183	Celf6	10090
A_51_P344376	0.0771	14788	Gpr162	10090
A_52_P175974	0.0778	258614	Olfr308	10090
A_51_P163901	0.078	258901	Olfr1219	10090
A_51_P328039	0.0783	27140	Tlx3	10090
A_51_P167292	0.0784	12655	Chi3l3	10090
A_51_P356751	0.0785	259012	Olfr1052	10090
A_52_P377693	0.0788	240121	Fsd1	10090
A_51_P219266	0.0795	71753	Tmprss6	10090
A_51_P208340	0.0796	258286	Olfr113	10090
A_52_P538390	0.0798	258458	Olfr165	10090
A_51_P207540	0.0802	258823	Olfr969	10090
A_51_P424878	0.0805	66469	2810405K02Rik	10090
A_51_P359525	0.0812	259067	Olfr449	10090
A_52_P530066	0.0816	208898	Unc13c	10090
A_51_P371411	0.0819	258976	Olfr1262	10090
A_52_P592135	0.082	258395	Olfr1288	10090
A_51_P497039	0.0821	13384	Mpp3	10090
A_52_P378167	0.0824	192161	Pcdha9	10090
A_52_P239320	0.0827	20972	Syngr1	10090
A_52_P582732	0.0828	74100	Arpp21	10090
A_51_P424290	0.0832	257913	Olfr141	10090
A_51_P175549	0.0848	258560	Olfr843	10090
A_52_P254155	0.0851	17229	Tpsb2	10090
A_52_P685821	0.0852	242474	D730040F13Rik	10090
A_51_P429903	0.0854	17986	Ndp	10090
A_52_P165575	0.0855	258615	Olfr360	10090
A_51_P466970	0.0862	258974	Olfr1233	10090
A_52_P49578	0.0867	435726		10090
A_52_P350554	0.0871	16500	Kcnb1	10090
A_51_P295410	0.0872	58243	Nap1l5	10090
A_51_P331752	0.0872	20292	Ccl11	10090
A_51_P344636	0.0873	258926	Olfr476	10090
A_52_P1091554	0.0876	329906	C030014L02	10090
A_52_P343298	0.0876	319890
A_52_P778486	0.0878	75722	4932412D23Rik	10090
A_52_P549223	0.0881	83995	Mmp1a	10090
A_51_P216990	0.0882	258810	Olfr665	10090
A_51_P290074	0.0882	12140	Fabp7	10090
A_52_P187058	0.0883	53324	Nptx2	10090
A_51_P192824	0.0884	258271	Olfr1311	10090
A_51_P358894	0.0889	73032	Ttc9b	10090
A_51_P357980	0.0892	26913	Gprin1	10090
A_51_P435844	0.0899	23958	Nr2e3	10090
A_51_P407235	0.09	258586	Olfr1111	10090
A_51_P338664	0.0902	78303	Hist3h2ba	10090
A_51_P210350	0.0903	216227	Slc17a8	10090
A_52_P87763	0.0903	258521	Olfr860	10090
A_51_P202340	0.0904	18999	Pou5f1	10090
A_52_P391624	0.0905	69539	Trnp1	10090
A_51_P284026	0.0906	73534	1700082M22Rik	10090
A_51_P426817	0.091	258282	Olfr801	10090
A_51_P325664	0.0914	258929	Olfr799	10090
A_51_P305854	0.0917	258980	Olfr1258	10090
A_51_P137236	0.0919	56177	Olfm1	10090
A_51_P379341	0.092	18013	Neurod2	10090
A_51_P106000	0.0921	320827	C530008M17Rik	10090
A_51_P303296	0.093	258889	Olfr1301	10090
A_51_P201490	0.0931	406175	Olfr242	10090
A_51_P196972	0.0935	20533	Slc4a1	10090
A_51_P268535	0.0938	93725	Ear10	10090
A_51_P173224	0.0944	211468	Kcnh8	10090
A_51_P147024	0.0947	239650	AI836003	10090
A_51_P447509	0.0955	258432	Olfr919	10090
A_51_P209818	0.0956	19152	Prtn3	10090
A_51_P201308	0.0958	194357	Moxd2	10090
A_52_P87997	0.0958	331063	Gsdmc2	10090
A_52_P214828	0.0962	19657	Rbmy1a1	10090
A_51_P339293	0.0968	258603	Olfr972	10090
A_51_P363729	0.0968	53856	Prg3	10090
A_51_P488362	0.0973	259123	Olfr632	10090
A_51_P283323	0.0975	258968	Olfr1247	10090
A_52_P92352	0.0975	330406	B4galnt3	10090
A_51_P144957	0.0979	229801	Tram1l1	10090
A_51_P363400	0.098	19074	Prg2	10090
A_51_P451588	0.0983	27276	Plekhb1	10090
A_52_P478394	0.0986	239133	Dleu7	10090
A_51_P163713	0.0991	258673	Olfr1428	10090
A_52_P113611	0.0993	20271	Scn5a	10090
A_51_P220262	0.0995	225743	Rnf165	10090
A_51_P246428	0.1	18312	Olfr15	10090
A_51_P325789	0.1	258887	Olfr1294	10090
A_51_P376207	0.1008	258950	Olfr342	10090
A_51_P150979	0.1009	258086	Olfr967	10090
A_52_P172910	0.1011	71869	Serpinb12	10090
A_51_P401894	0.1014	18159	Nppc	10090
A_51_P146843	0.1015	258679	Olfr1440	10090
A_52_P386584	0.1018	67935	Ces5a	10090
A_51_P465571	0.102	78283	Mtap7d2	10090
A_52_P316368	0.102	257951	Olfr987	10090
A_51_P487027	0.1023	16526	Kcnk2	10090
A_52_P621751	0.1024	75758	9130401M01Rik	10090
A_52_P106560	0.1026	258398	Olfr1295	10090
A_51_P509551	0.1028	20265	Scn1a	10090
A_51_P241769	0.1029	19746	Rhd	10090
A_51_P230175	0.1034	12032	Bcan	10090
A_52_P185136	0.1034	70503	Ddo	10090
A_52_P49457	0.1039	214931	Fbxl16	10090
A_52_P130814	0.1043	15166	Hcn2	10090
A_52_P565507	0.1046	53876	Ear3	10090
A_52_P915042	0.1046	78288	5330421F21Rik	10090
A_51_P185071	0.1049	258329	Olfr135	10090
A_51_P124209	0.105	258786	Olfr1238	10090
A_51_P137018	0.1053	73988	4930438A08Rik	10090
A_51_P153995	0.1054	54368	Gp9	10090
A_51_P411335	0.106	18362	Olfr61	10090
A_51_P163979	0.1063	18348	Olfr49	10090
A_51_P233338	0.1063	18345	Olfr46	10090
A_51_P458852	0.1065	100047943
A_52_P153522	0.1066	78081	Crisp4	10090
A_51_P297369	0.107	258512	Olfr530	10090
A_51_P151246	0.1073	404322	Olfr924	10090
A_51_P261560	0.108	73376	1700061J05Rik	10090
A_52_P679869	0.1092	245578	Pcdh11x	10090
A_51_P143016	0.1094	258111	Olfr1129	10090
A_51_P109298	0.1095	258996	Olfr201	10090
A_51_P299062	0.1102	23925	Kel	10090
A_51_P499960	0.1103	258846	Olfr1157	10090
A_52_P349596	0.1106	320573	C130024J02Rik	10090
A_52_P488427	0.1109	67815	Sec14l2	10090
A_51_P138238	0.1112	258915	Olfr1348	10090
A_52_P85319	0.1115	233801	Acsm4	10090
A_52_P529374	0.1117	239188	Enox1	10090
A_51_P334563	0.1118	73034	2900064B16Rik	10090
A_51_P412966	0.1118	16979	Lrrn1	10090
A_52_P412362	0.1123	258544	Olfr788	10090
A_51_P346815	0.1125	76219	6530401D17Rik	10090
A_51_P460143	0.1126	23956	Neu2	10090
A_52_P1059496	0.113	76673	5330411O13Rik	10090
A_51_P294807	0.1131	13830	Stom	10090
A_51_P424810	0.1138	76044	Ncapg2	10090
A_51_P247542	0.114	237930	Ttll6	10090
A_52_P429944	0.1141	319924	Apba1	10090
A_51_P393375	0.1142	16490	Kcna2	10090
A_51_P413302	0.1144	22018	Tpo	10090
A_52_P443715	0.1145	319662
A_51_P363123	0.115	100041876	Gm3560	10090
A_51_P194609	0.1151	328780	Prss34	10090
A_51_P285592	0.1155	258425	Olfr994	10090
A_52_P317608	0.1158	269862	Olfr1349	10090
A_51_P358700	0.1159	258904	Olfr1221	10090
A_51_P242643	0.1161	207667	Skor1	10090
A_51_P520809	0.1161	71875	2300010F08Rik	10090
A_51_P429770	0.1162	14125	Fcer1a	10090
A_52_P50207	0.1167	258674	Olfr1427	10090
A_51_P431684	0.1168	258575	Olfr1046	10090
A_51_P380824	0.1171	258893	Olfr1225	10090
A_52_P63739	0.1172	378700	Rya3	10090
A_51_P406204	0.1173	258666	Olfr822	10090
A_52_P37091	0.1173	14924	Magi1	10090
A_52_P632359	0.1174	258737	Olfr1316	10090
A_51_P397876	0.1175	13799	En2	10090
A_52_P603630	0.1188	320491	A830054O04Rik	10090
A_52_P416341	0.1189	22295	Cdh23	10090
A_52_P378181	0.1192	75140	Slxl1	10090
A_51_P395864	0.1195	77465	C030027H14Rik	10090
A_51_P422934	0.1198	258956	Olfr535	10090
A_51_P267169	0.1199	433323	Sgpp2	10090
A_52_P282110	0.1199	17260	Mef2c	10090
A_52_P311313	0.1204	15165	Hcn1	10090
A_51_P306243	0.1205	259126	Olfr623	10090
A_51_P460562	0.1206	258527	Olfr1368	10090
A_51_P159641	0.1208	258479	Olfr203	10090
A_51_P346575	0.1208	19743	Rhag	10090
A_51_P453736	0.1212	328563	Apol11b	10090
A_51_P245895	0.1213	225724	Mapk4	10090
A_51_P331003	0.1214	26456	Sema4g	10090
A_52_P122461	0.1217	258117	Olfr1437	10090
A_52_P40569	0.1217	67339	1700066J03Rik	10090
A_52_P827102	0.1222	319931	A330032B11Rik	10090
A_51_P392055	0.1227	258970	Olfr1242	10090
A_52_P557059	0.1227	258513	Olfr536	10090
A_51_P263246	0.1228	18218	Dusp8	10090
A_51_P269216	0.123	107503	Atf5	10090
A_51_P454993	0.1233	68875	Tmcc2	10090
A_51_P181354	0.1241	78280	5330430B06Rik	10090
A_51_P356217	0.1244	258604	Olfr970	10090
A_52_P69955	0.1245	57816	Tesc	10090
A_52_P183038	0.1249	23917	Impdh1	10090
A_51_P271425	0.125	269788	Lhfpl4	10090
A_51_P366306	0.1256	72693	Zcchc12	10090
A_52_P535962	0.1256	630537	Dcpp2	10090
A_52_P200365	0.1257	258672	Olfr825	10090
A_51_P327970	0.1258	20254	Scg2	10090
A_51_P200249	0.1264	258499	Olfr945	10090
A_51_P107373	0.1266	77425	9430081G06Rik	10090
A_51_P208537	0.1269	77613	Prss36	10090
A_51_P423743	0.1269	54419	Cldn6	10090
A_52_P286278	0.1269	258611	Olfr297	10090
A_51_P277199	0.1274	207798	Gramd1c	10090
A_51_P389539	0.1274	110789	Gpr98	10090
A_52_P155100	0.1276	56013	Srcin1	10090
A_51_P474498	0.1279	93670	Tac4	10090
A_51_P114314	0.1286	71434	5530400B01Rik	10090
A_52_P596595	0.1287	239157	Pnma2	10090
A_51_P360622	0.1293	232089	Elmod3	10090
A_51_P195635	0.1296	258402	Olfr1079	10090
A_51_P434190	0.1296	258627	Olfr1504	10090
A_51_P190254	0.1297	69938	Scrn1	10090
A_51_P289482	0.1308	101179	6430519N07Rik	10090
A_52_P408391	0.1309	18012	Neurod1	10090
A_52_P550124	0.1309	76628	1700112J16Rik	10090
A_51_P508341	0.131	52250	Reep1	10090
A_52_P15857	0.131	328906	D830029L11	10090
A_51_P373498	0.132	259093	Olfr572	10090
A_52_P401824	0.1329	22088	Tsg101	10090
A_51_P386492	0.133	433157
A_51_P327451	0.1333	11656	Alas2	10090
A_52_P210781	0.1336	20269	Scn3a	10090
A_52_P421082	0.1337	338375	Atp6v1g3	10090
A_51_P308862	0.1338	14616	Gja8	10090
A_51_P384693	0.134	67703	Kirrel3	10090
A_51_P294233	0.1347	71950	Nanog	10090
A_52_P661327	0.1347	70911	Phyhipl	10090
A_52_P385526	0.135	258671	Olfr826	10090
A_51_P487964	0.1354	259035	Olfr714	10090
A_52_P20688	0.1356	258480	Olfr130	10090
A_52_P311263	0.1361	381338	Lonrf2	10090
A_51_P257690	0.1364	18343	Olfr44	10090
A_51_P279154	0.137	19716	Bex1	10090
A_51_P218857	0.1373	258670	Olfr820	10090
A_51_P472857	0.1384	258607	Olfr971	10090
A_51_P296549	0.1388	84036	Kcnn1	10090
A_51_P171510	0.1389	258042	Olfr487	10090
A_51_P216125	0.1395	258246	Olfr594	10090
A_51_P105263	0.1399	269854	Nat14	10090
A_51_P211793	0.1403	19771	Rlbp1	10090
A_51_P175945	0.1415	239408	Tmem74	10090
A_52_P549135	0.1415	258660	Olfr736	10090
A_52_P42255	0.1422	12933	Crmp1	10090
A_51_P348154	0.1429	258440	Olfr1317	10090
A_51_P468150	0.1434	258258	Olfr1308	10090
A_51_P457759	0.1438	258805	Olfr1426	10090
A_51_P363960	0.144	258305	Olfr1356	10090
A_52_P411274	0.144	233879	Asphd1	10090
A_51_P375771	0.1447	211612	Ptchd1	10090
A_51_P430055	0.1454	21912	Tspan7	10090
A_52_P622042	0.1455	114640	Pth2	10090
A_51_P318104	0.146	11820	App	10090
A_51_P422042	0.1464	258979	Olfr1255	10090
A_52_P619192	0.1465	242819	Rundc3b	10090
A_51_P184648	0.1468	258094	Olfr761	10090
A_52_P497021	0.1479	101809	Spred3	10090
A_52_P605500	0.148	17391	Mmp24	10090
A_52_P322941	0.1485	626870	Gm11992	10090
A_51_P442736	0.1487	258362	Olfr1094	10090
A_51_P372372	0.1491	258302	Olfr420	10090
A_51_P483108	0.1491	216393	D930020B18Rik	10090
A_52_P533040	0.1498	258548	Olfr805	10090
A_52_P975	0.15	17389	Mmp16	10090
A_51_P386280	0.1508	258319	Olfr187	10090
A_52_P645862	0.1516	11607	Agtr1a	10090
A_52_P451334	0.1519	68020	2810002N01Rik	10090
A_52_P26357	0.1526	54126	Arhgef7	10090
A_51_P168630	0.153	16596	Klf1	10090
A_51_P499223	0.153	404502
A_52_P213807	0.153	258400	Olfr228	10090
A_51_P432678	0.1533	16415	Itgb2l	10090
A_51_P251205	0.1537	73728	Psd	10090
A_52_P621707	0.1541	258831	Olfr101	10090
A_51_P211064	0.1543	56860	Olfr690	10090
A_52_P680637	0.1545	258401	Olfr1076	10090
A_52_P747383	0.1548	381174	A330084C13Rik	10090
A_51_P403610	0.1566	258851	Olfr1339	10090
A_51_P390046	0.1568	258318	Olfr186	10090
A_52_P468639	0.1568	258437	Olfr450	10090
A_51_P284686	0.159	269774	Aak1	10090
A_52_P265965	0.1591	28105	Trim36	10090
A_52_P672636	0.1591	259111	Olfr974	10090
A_51_P501069	0.1602	20739	Spna1	10090
A_51_P309754	0.1605	100046808	LOC100046808	10090
A_51_P228182	0.1606	258770	Olfr472	10090
A_51_P237418	0.1611	75768	4833422M21Rik	10090
A_52_P517959	0.1613	76138	Ccdc138	10090
A_51_P269485	0.1615	258699	Olfr1446	10090
A_52_P818604	0.162	75309	4930565D16Rik	10090
A_52_P404281	0.1623	259037	Olfr711	10090
A_51_P433753	0.1629	257898	Olfr867	10090
A_52_P402897	0.1631	12561	Cdh4	10090
A_51_P344606	0.1635	19132	Prph	10090
A_51_P403728	0.1639	258274	Olfr1412	10090
A_52_P1034835	0.164	73043	2900064F13Rik	10090
A_51_P126089	0.1641	258447	Olfr1241	10090
A_52_P69194	0.1641	194237	Rimkla	10090
A_51_P155514	0.1651	19109	Prl	10090
A_51_P116725	0.1659	258804	Olfr1240	10090
A_52_P277205	0.1661	23792	Adam23	10090
A_52_P605585	0.1662	258663	Olfr739	10090
A_51_P137604	0.1672	14133	Fcna	10090
A_52_P136026	0.1675	258450	Olfr1199	10090
A_51_P219868	0.1678	13429	Dnm1	10090
A_52_P507665	0.1679	67071	Rps6ka6	10090
A_51_P289062	0.1681	12968	Cryge	10090
A_52_P94830	0.1685	108760	Galntl1	10090
A_51_P482365	0.1688	70638	Fam189a1	10090
A_51_P183401	0.1692	258850	Olfr295	10090
A_52_P94401	0.1695	237847	Rtn4rl1	10090
A_52_P288951	0.1701	258508	Olfr99	10090
A_51_P313246	0.1706	258369	Olfr509	10090
A_52_P347942	0.1708	258464	Olfr1384	10090
A_51_P233583	0.1711	56760	Clec1b	10090
A_52_P189707	0.1713	12322	Camk2a	10090
A_51_P304906	0.1737	77966	A930035E12Rik	10090
A_51_P441120	0.1742	258944	Olfr351	10090
A_52_P502357	0.1747	320122	C230086J09Rik	10090
A_51_P324950	0.1748	12937	Pcdha6	10090
A_51_P391716	0.175	27028	Ermap	10090
A_51_P270874	0.1759	74933	4930469G21Rik	10090
A_51_P350069	0.1766	258768	Olfr1189	10090
A_51_P420684	0.1777	20964	Syn1	10090
A_52_P129624	0.1781	331374	Dgkk	10090
A_51_P364364	0.1793	18072	Nhlh2	10090
A_51_P473363	0.1794	258206	Olfr1264	10090
A_52_P625321	0.1798	73660	Cabp4	10090
A_52_P265131	0.1804	241134	9430031J16Rik	10090
A_52_P328365	0.1804	268747	Lrrc16b	10090
A_51_P389265	0.1806	116939	Pnpla3	10090
A_52_P159429	0.1816	239691	AU021092	10090
A_51_P288459	0.1817	19725	Rfx2	10090
A_52_P222026	0.1821	11444	Chrnb2	10090
A_51_P208857	0.1828	258297	Olfr827	10090
A_51_P338698	0.1828	259046	Olfr679	10090
A_51_P261388	0.183	268510	Mgat5b	10090
A_51_P324623	0.183	258975	Olfr1234	10090
A_51_P361958	0.1831	258789	Olfr1271	10090
A_51_P265792	0.1833	258359	Olfr1312	10090
A_51_P400269	0.1833	209837	Slc38a5	10090
A_51_P247103	0.1834	258774	Olfr1208	10090
A_52_P706013	0.184	72915	2900017F05Rik	10090
A_52_P189358	0.1846	77483
A_51_P163252	0.1849	30953	Schip1	10090
A_51_P502492	0.1849	258320	Olfr1232	10090
A_52_P91019	0.1851	257888	Olfr1386	10090
A_51_P496253	0.1852	15567	Slc6a4	10090
A_51_P264695	0.1864	12971	Crym	10090
A_51_P270426	0.1868	13656	Egr4	10090
A_52_P325444	0.1869	18483	Palm	10090
A_51_P381329	0.1875	258181	Olfr406-ps	10090
A_51_P458130	0.1876	21990	Tph1	10090
A_51_P274080	0.1884	268723	A830039N20Rik	10090
A_51_P482968	0.1888	78537	C030005H24Rik	10090
A_52_P38011	0.1895	76897	Ralyl	10090
A_51_P240508	0.1897	259119	Olfr578	10090
A_52_P439208	0.1903	259017	Olfr1019	10090
A_51_P438781	0.1912	258051	Olfr93	10090
A_51_P463912	0.1919	23963	Odz1	10090
A_51_P498909	0.1922	258801	Olfr907	10090
A_52_P538412	0.1937	259085	Olfr610	10090
A_51_P254262	0.1949	104079	Nxph3	10090
A_51_P368883	0.1951	384214	Ephx4	10090
A_51_P132101	0.1953	258327	Olfr958	10090
A_52_P1115389	0.1962	75681	2310041K03Rik	10090
A_51_P391897	0.1963	258287	Olfr125	10090
A_51_P160710	0.1967	258867	Olfr131	10090
A_51_P488092	0.1967	18582	Pde6d	10090
A_51_P452876	0.1968	11636	Ak1	10090
A_51_P474721	0.1971	404325	Olfr1057	10090
A_52_P645357	0.1976	72674	Adipor1	10090
A_51_P155085	0.1982	209773	Dennd2a	10090
A_52_P946997	0.1984	76174	6330526H18Rik	10090
A_52_P355709	0.1993	664837	Gm7361	10090
A_52_P642360	0.1996	258538	Olfr775	10090
A_51_P424722	0.1997	75659	Wdr54	10090
A_51_P440030	0.2002	258748	Olfr1195	10090
A_51_P313674	0.2005	17381	Mmp12	10090
A_51_P509824	0.2006	320614	A330033J07Rik	10090
A_51_P362554	0.2008	257956	Olfr1307	10090
A_51_P392377	0.2008	327814	Ppfia2	10090
A_52_P469440	0.2009	70474	5730405A10Rik	10090
A_51_P300130	0.2015	76602	1700040D17Rik	10090
A_51_P455647	0.2015	12349	Car2	10090
A_51_P496309	0.2016	71137	Rfx4	10090
A_51_P488063	0.2017	230872	Crocc	10090
A_51_P159986	0.2019	258675	Olfr1423	10090
A_51_P416927	0.202	18313	Olfr16	10090
A_52_P557129	0.2021	57138	Slc12a5	10090
A_51_P356620	0.2022	67790	Rab39b	10090
A_51_P506714	0.2029	72634	Tdrkh	10090
A_52_P642074	0.2032	320662	Casc1	10090
A_52_P311300	0.2036	74279	1700080O16Rik	10090
A_52_P424627	0.204	319564	C230012O17Rik	10090
A_51_P234881	0.2044	83603	Elovl4	10090
A_52_P771081	0.2049	328456	6720482D04	10090
A_51_P408703	0.205	74264	1700045I19Rik	10090
A_51_P334155	0.2052	67741	4930579F01Rik	10090
A_51_P354419	0.2062	258997	Olfr202	10090
A_52_P187210	0.2062	244813	Bsx	10090
A_51_P436630	0.2066	219149	Xkr6	10090
A_51_P302346	0.2067	258854	Olfr985	10090
A_52_P339748	0.207	257924	Olfr947-ps1	10090
A_52_P363316	0.2074	212392	Ccdc110	10090
A_51_P125965	0.2087	76708
A_51_P240136	0.2087	14709	Gng8	10090
A_51_P227718	0.2091	233046	Rasgrp4	10090
A_51_P209921	0.2095	212448	9330159F19Rik	10090
A_51_P443642	0.2096	258687	Olfr1454	10090
A_52_P401295	0.2113	546894	Gm5989	10090
A_51_P325862	0.2115	27281	Hrasls	10090
A_51_P113129	0.2117	67821	Atp1b4	10090
A_51_P235764	0.2118	259052	Olfr659	10090
A_52_P342608	0.2128	404324	Olfr1051	10090
A_51_P362627	0.213	21955	Tnnt1	10090
A_51_P122452	0.2138	258268	Olfr1511	10090
A_51_P434928	0.2145	258284	Olfr114	10090
A_51_P436491	0.2147	237403	Lingo3	10090
A_52_P305053	0.2148	320456	B330016D10Rik	10090
A_51_P343443	0.2152	258682	Olfr1436	10090
A_52_P67741	0.2154	433746	Gm12830	10090
A_51_P104197	0.2155	244757	Glb1l2	10090
A_51_P375783	0.2164	22264	Prap1	10090
A_51_P113322	0.217	243880	Nlrp4a	10090
A_51_P265920	0.217	71180	4933416E14Rik	10090
A_52_P68633	0.217	236509	Olfr366	10090
A_51_P183334	0.2171	228767	BC052486	10090
A_51_P294555	0.2172	213002	Ifitm6	10090
A_51_P441426	0.2173	56744	Pf4	10090
A_51_P483159	0.2173	320415	Gchfr	10090
A_51_P243646	0.2174	237300	Gm4922	10090
A_51_P122972	0.2183	74913
A_51_P370678	0.2183	14582	Gfi1b	10090
A_52_P284840	0.2184	66715	4921515J06Rik	10090
A_52_P650453	0.2186	20731	Spink4	10090
A_52_P43168	0.2187	75498	1700008A07Rik	10090
A_51_P267194	0.219	23873	Faim	10090
A_51_P110341	0.22	68662	Scgb3a1	10090
A_51_P411757	0.2202	268445	Ankrd13b	10090
A_52_P253913	0.2205	18372	Olfr8	10090
A_51_P245263	0.2212	258888	Olfr1298	10090
A_51_P143040	0.2216	258834	Olfr1126	10090
A_52_P527697	0.2217	258434	Olfr934	10090
A_51_P166258	0.2218	108013	Celf4	10090
A_51_P173976	0.2218	258741	Olfr935	10090
A_51_P313729	0.222	258331	Olfr1330	10090
A_51_P361150	0.2221	66425	Pcp4l1	10090
A_51_P403504	0.2221	258875	Olfr895	10090
A_52_P472098	0.2222	19317	Qk	10090
A_51_P133911	0.2225	258570	Olfr1043	10090
A_51_P345596	0.2226	257875	Olfr1116-ps	10090
A_51_P223307	0.2234	404337	Olfr1383	10090
A_51_P308697	0.2239	258443	Olfr164	10090
A_51_P178083	0.2247	19711	Resp18	10090
A_51_P272646	0.2247	21968	Tom1	10090
A_52_P629709	0.2249	258442	Olfr1314	10090
A_51_P445765	0.2251	16975	Lrp8	10090
A_51_P182728	0.226	20907	Stx1a	10090
A_52_P488623	0.226	320557	Fam169a	10090
A_51_P484279	0.2261	100038859	Olfr55	10090
A_52_P358429	0.2261	319415	Hs3st5	10090
A_51_P316243	0.2262	78444	Pgpep1l	10090
A_51_P143309	0.2268	258306	Olfr1337	10090
A_51_P297441	0.2268	114875	Plcz1	10090
A_52_P669986	0.2269	258905	Olfr871	10090
A_51_P432117	0.2271	57270	Olfr1508	10090
A_51_P439311	0.2274	72301	1810041L15Rik	10090
A_51_P344249	0.2277	11785	Apbb1	10090
A_52_P519783	0.2281	17005	Ltk	10090
A_51_P456816	0.2295	245537	Nlgn3	10090
A_52_P622850	0.2297	15208	Hes5	10090
A_51_P358122	0.2301	257932	Olfr332	10090
A_51_P491856	0.2303	258224	Olfr1358	10090
A_51_P469568	0.2304	57255	Cldn13	10090
A_51_P468912	0.2306	93872	Pcdhb1	10090
A_52_P209973	0.2317	66072	Sdhaf2	10090
A_51_P150745	0.2322	259013	Olfr1044	10090
A_51_P501840	0.2322	15504	Dnajb3	10090
A_51_P334490	0.2328	234797	6430548M08Rik	10090
A_52_P6442	0.2329	208076	Pknox2	10090
A_51_P469777	0.2331	258289	Olfr1324	10090
A_51_P442445	0.2333	56079	Astn2	10090
A_51_P506093	0.2334	76686	Clip3	10090
A_51_P115471	0.2338	239552	Apol8	10090
A_52_P497392	0.2338	620253	Dcpp3	10090
A_52_P342654	0.2339	353130	Prss33	10090
A_52_P322336	0.2347	319926	9630021D06Rik	10090
A_51_P390744	0.2349	258466	Olfr1261	10090
A_51_P330647	0.2356	258977	Olfr1273-ps	10090
A_52_P1004481	0.236	100039222	Gm2109	10090
A_51_P355151	0.2361	73047	Camk2n2	10090
A_52_P289091	0.2361	13089	Cyp2b13	10090
A_52_P124734	0.2366	73649	Cybrd1	10090
A_52_P490071	0.237	258543	Olfr810	10090
A_52_P443532	0.2372	67430	4921536K21Rik	10090
A_52_P1028683	0.238	319343	C230047L17Rik	10090
A_52_P276397	0.238	19339	Rab3a	10090
A_51_P494875	0.2383	54377	Cacng4	10090
A_52_P684138	0.2386	70127	Dpf3	10090
A_52_P289559	0.2387	277396	Klhl23	10090
A_51_P476030	0.2388	104806	Fancm	10090
A_51_P260850	0.2389	66797	Cntnap2	10090
A_51_P398260	0.2391	72948	Tppp	10090
A_51_P117165	0.2394	70730	6330409D20Rik	10090
A_51_P303160	0.2395	11846	Arg1	10090
A_51_P306710	0.2395	60363	Cldn15	10090
A_51_P350748	0.2401	66995	Zcchc18	10090
A_51_P464892	0.2402	74629	4930426L09Rik	10090
A_51_P399974	0.2405	258999	Olfr178	10090
A_51_P268469	0.2409	93890	Pcdhb19	10090
A_51_P467438	0.2409	329460	Olfr1193	10090
A_52_P145433	0.241	52480	D7Ertd715e	10090
A_52_P650151	0.2414	14254	Flt1	10090
A_51_P281273	0.2415	258589	Olfr703	10090
A_51_P429308	0.2416	74513	Neto2	10090
A_51_P202050	0.2419	14357	Dtx1	10090
A_51_P458451	0.243	11450	Adipoq	10090
A_52_P577533	0.243	270097	Vat1l	10090
A_52_P503254	0.2439	258151	Olfr1505	10090
A_52_P96847	0.2445	75606	2010003K15Rik	10090
A_51_P456699	0.2447	258791	Olfr812	10090
A_52_P166735	0.2448	73884	Zdbf2	10090
A_51_P209413	0.2449	11642	Akap3	10090
A_51_P175858	0.2461	320635	Cyb5r2	10090
A_51_P263965	0.2471	15368	Hmox1	10090
A_51_P424338	0.2472	18104	Nqo1	10090
A_52_P620448	0.2472	17116	Mab21l1	10090
A_51_P442788	0.2474	140559	Igsf8	10090
A_52_P646912	0.2476	16348	Invs	10090
A_51_P310109	0.2479	18352	Olfr52	10090
A_51_P318510	0.2489	19275	Ptprn	10090
A_51_P220837	0.2491	258542	Olfr786	10090
A_51_P255295	0.2499	12279	C9	10090
A_51_P450989	0.2504	257666	Olfr772	10090
A_51_P519497	0.2504	67753	4930579C15Rik	10090
A_51_P162671	0.251	14276	Folr2	10090
A_51_P108226	0.2511	66107	1100001G20Rik	10090
A_51_P466731	0.2512	258501	Olfr959	10090
A_51_P505803	0.2513	228858	Gdap1l1	10090
A_52_P1059487	0.2514	76158	6330510M09Rik	10090
A_51_P259009	0.2516	12297	Cacnb3	10090
A_51_P417251	0.2523	103712	6330403K07Rik	10090
A_51_P312952	0.2534	71981	Tdrd12	10090
A_52_P97699	0.2535	268595	D430019H16Rik	10090
A_51_P198664	0.2539	235854	Mrgpra4	10090
A_52_P409731	0.254	56807	Scamp5	10090
A_52_P594944	0.2542	258470	Olfr91	10090
A_51_P412926	0.2551	16675	Krt27	10090
A_51_P186178	0.2554	216152	BC005764	10090
A_51_P247976	0.256	259034	Olfr705	10090
A_52_P171458	0.2567	258640	Olfr152	10090
A_51_P407028	0.2571	12351	Car4	10090
A_52_P365342	0.2571	16980	Lrrn2	10090
A_51_P158418	0.2578	72842	2810488G03Rik	10090
A_51_P341306	0.2586	258218	Olfr102	10090
A_52_P203404	0.2587	214191	Ttc24	10090
A_51_P387388	0.2589	258276	Olfr960	10090
A_52_P193785	0.259	70097	Sash1	10090
A_52_P17556	0.2591	171284	Timd2	10090
A_51_P129065	0.2593	14681	Gnao1	10090
A_51_P515965	0.2593	18022	Nfe2	10090
A_51_P267441	0.26	66198	Them5	10090
A_51_P516119	0.26	258220	Olfr1148	10090
A_51_P188981	0.2606	100045340
A_52_P513345	0.2607	74464	Zswim5	10090
A_51_P474551	0.2608	13075	Cyp19a1	10090
A_52_P459564	0.2609	16399	Itga2b	10090
A_52_P45080	0.2622	330283	9430029A11Rik	10090
A_52_P551771	0.2622	258520	Olfr849	10090
A_52_P850851	0.2629	56307	Metap2	10090
A_51_P128304	0.2639	258563	Olfr1006	10090
A_52_P169696	0.2641	77433	9430076G02Rik	10090
A_52_P292882	0.2648	65111	Dap3	10090
A_51_P371408	0.2661	77035	Jmjd5	10090
A_52_P193022	0.2661	15216	Hfe	10090
A_52_P213889	0.2661	209760	Tmc7	10090
A_52_P341569	0.2669	338352	Nell1	10090
A_51_P426513	0.2671	57430	Sult3a1	10090
A_52_P225888	0.2672	68941	1110018N20Rik	10090
A_52_P492989	0.2673	13004	Ncan	10090
A_51_P136508	0.2678	11998	Avp	10090
A_52_P631307	0.268	241525	Ypel4	10090
A_51_P332309	0.2682	13813	Eomes	10090
A_52_P62121	0.2683	14763	Gpr37	10090
A_51_P404377	0.2685	11858	Rnd2	10090
A_52_P145539	0.2688	22095	Tshr	10090
A_52_P262124	0.2688	258626	Olfr1501	10090
A_51_P183803	0.2689	20439	Siah2	10090
A_51_P186911	0.2691	259066	Olfr520	10090
A_51_P410900	0.2695	171167	Fut10	10090
A_51_P445467	0.2696	258685	Olfr1472	10090
A_51_P481930	0.2698	12555	Cdh15	10090
A_51_P465172	0.2706	77790	A930006J02Rik	10090
A_51_P347144	0.2713	258797	Olfr904	10090
A_51_P499020	0.2714	14120	Fbp2	10090
A_52_P323315	0.2714	381199	Tmem151a	10090
A_52_P174456	0.2716	70432	Rufy2	10090
A_51_P358484	0.2722	270190	Ephb1	10090
A_51_P485349	0.2723	229877	Rap1gds1	10090
A_52_P174166	0.2723	333050	Ksr2	10090
A_51_P253426	0.2731	258732	Olfr494	10090
A_51_P283447	0.2733	258423	Olfr1510	10090
A_52_P224513	0.2736	258460	Olfr1391	10090
A_52_P508962	0.2738	16498	Kcnab2	10090
A_51_P443032	0.274	18365	Olfr65	10090
A_51_P116896	0.2743	258764	Olfr1099	10090
A_52_P214661	0.2746	20641	Snrpd1	10090
A_52_P54770	0.2747	320701	Fam19a4	10090
A_51_P436790	0.2749	257959	Olfr1537-ps1	10090
A_51_P203943	0.275	259050	Olfr652	10090
A_51_P393718	0.2758	258415	Olfr887	10090
A_51_P458707	0.2765	257929	Olfr299	10090
A_51_P472078	0.2766	71524	8430432A02Rik	10090
A_51_P392776	0.2768	237711	Eml6	10090
A_52_P1132570	0.2772	103106
A_52_P208681	0.2772	110257	Hba-a2	10090
A_52_P467488	0.2772	76157	Slc35d3	10090
A_51_P217682	0.2774	74737	Pcf11	10090
A_52_P169764	0.2785	105283	E030046B03Rik	10090
A_51_P430414	0.2786	258296	Olfr745	10090
A_51_P220374	0.2787	216749	Nmur2	10090
A_52_P684087	0.2787	100044708
A_52_P684087	0.2787	53404	Atoh7	10090
A_52_P281862	0.2794	67344	Tctex1d1	10090
A_52_P519943	0.2799	328035	Fads6	10090
A_51_P439996	0.2808	14729	Gp5	10090
A_52_P32453	0.2812	76587
A_52_P670095	0.2821	14460	Gata1	10090
A_51_P136589	0.2822	258933	Olfr796	10090
A_51_P227239	0.2824	259027	Olfr380	10090
A_51_P108228	0.2825	11441	Chrna7	10090
A_52_P154026	0.2827	381678	Zcwpw1	10090
A_51_P389650	0.2828	243979	Mrgprb2	10090
A_52_P438144	0.2831	57775	Usp29	10090
A_52_P1067686	0.2841	52840	Dbndd2	10090
A_51_P108555	0.2842	258293	Olfr437	10090
A_51_P495710	0.2843	75164	4930527J03Rik	10090
A_52_P229997	0.2846	30951	Cbx8	10090
A_51_P504658	0.2848	258245	Olfr1036	10090
A_51_P336293	0.2852	106763	Ttbk1	10090
A_51_P201751	0.2855	57251	Olfr870	10090
A_51_P288916	0.286	278279	Tmtc2	10090
A_51_P226922	0.2861	30052	Pcsk1n	10090
A_51_P449507	0.2867	16570	Kif3c	10090
A_51_P117385	0.2868	208890	Slc26a7	10090
A_51_P490070	0.2868	22446	Xlr3c	10090
A_52_P280938	0.2877	258943	Olfr353	10090
A_52_P1115773	0.2893	100047982
A_51_P202143	0.2896	68653	Samm50	10090
A_51_P518688	0.2896	269695	Rnft2	10090
A_52_P67270	0.2896	67642	4930515G01Rik	10090
A_52_P342620	0.2901	207785	Csrnp2	10090
A_52_P435009	0.2907	385354	Frmd7	10090
A_51_P289429	0.2912	320277	Spef2	10090
A_51_P138830	0.2915	226123	Morn4	10090
A_52_P389965	0.2915	70861	Akr1cl	10090
A_51_P501550	0.2919	67883	Uxs1	10090
A_52_P523569	0.2921	28169	Agpat3	10090
A_52_P293120	0.2923	208748	Prrg3	10090
A_51_P164296	0.293	58860	Adamdec1	10090
A_51_P454542	0.293	56856	Insm2	10090
A_51_P240624	0.2945	258326	Olfr642	10090
A_51_P152685	0.2948	270109	Pcnxl2	10090
A_51_P414305	0.2949	74156	Acot12	10090
A_51_P182427	0.2953	258841	Olfr1107	10090
A_51_P119315	0.2959	75287
A_51_P494751	0.2959	98558	Mael	10090
A_51_P507899	0.2959	76260	Ttc8	10090
A_51_P199249	0.2965	258836	Olfr272	10090
A_51_P406165	0.2966	78252	Fam55b	10090
A_52_P604243	0.2966	76142	Ppp1r14c	10090
A_51_P219888	0.2967	258726	Olfr599	10090
A_52_P258266	0.297	654440	A430046D13Rik	10090
A_51_P509137	0.2976	12123	Hrk	10090
A_52_P402663	0.2982	78177	Ninl	10090
A_51_P411801	0.2988	258371	Olfr368	10090
A_52_P778544	0.2992	77533	C030034I22Rik	10090
A_51_P197137	0.2995	258267	Olfr370	10090
A_51_P329879	0.2996	72096	Mettl10	10090
A_52_P1060867	0.2998	399639	C530038A18Rik	10090
A_51_P381683	0.3	11302	Aatk	10090
A_52_P1114735	0.3004	73164	3110037B15Rik	10090
A_52_P26086	0.3005	258960	Olfr171	10090
A_52_P569111	0.3006	432958	LOC432958	10090
A_51_P116889	0.301	258448	Olfr92	10090
A_51_P241577	0.301	71020	Spats1	10090
A_52_P606569	0.3011	75930	4930567H12Rik	10090
A_51_P173107	0.3013	69809	1810046K07Rik	10090
A_51_P444920	0.3013	258209	Olfr22-ps1	10090
A_52_P278538	0.3014	15122	Hba-a1	10090
A_52_P140005	0.3023	70701	Nipal1	10090
A_51_P147188	0.3025	258041	Olfr485	10090
A_52_P204393	0.3028	67379	Dedd2	10090
A_52_P645855	0.3034	52331	Stbd1	10090
A_51_P289464	0.304	72899	Macrod2	10090
A_51_P386182	0.3044	50791	Magi2	10090
A_51_P139985	0.3048	57811	Rgr	10090
A_51_P249313	0.3048	73998	Herc3	10090
A_51_P302256	0.3051	13385	Dlg4	10090
A_52_P359718	0.3051	75607	Wnk2	10090
A_51_P379687	0.3053	100038846	Gm1973	10090
A_51_P308625	0.3056	258754	Olfr214	10090
A_51_P259259	0.3057	258844	Olfr1090	10090
A_52_P150436	0.3068	74284	1700086L19Rik	10090
A_51_P386069	0.3078	319642	Rab9b	10090
A_52_P534018	0.3081	67091	Trappc6a	10090
A_52_P66226	0.3081	19337	Rab33a	10090
A_52_P25283	0.3082	77629	Sphkap	10090
A_52_P524988	0.3083	258680	Olfr1433	10090
A_51_P239426	0.3084	257667	Olfr769	10090
A_52_P475578	0.3091	320217	B130020M22Rik	10090
A_52_P476029	0.3097	329540	8430427H17Rik	10090
A_52_P518087	0.3097	320919	A230107N01Rik	10090
A_51_P209782	0.3103	226143	Cyp2c44	10090
A_51_P103745	0.3106	13483	Dpp6	10090
A_51_P438149	0.3107	212307	Mapre2	10090
A_52_P169982	0.3108	110935	Atp6v1b1	10090
A_51_P508394	0.3111	258572	Olfr1032	10090
A_52_P275678	0.3112	238252	Gpr135	10090
A_51_P382204	0.3118	212684	Pdzd7	10090
A_51_P224164	0.3122	23985	Slc26a4	10090
A_52_P227190	0.3123	258405	Olfr1420	10090
A_51_P157406	0.3127	19215	Ptgds	10090
A_52_P65268	0.3136	208967	Thnsl1	10090
A_51_P398848	0.3138	68729	Trim37	10090
A_52_P558751	0.3146	19889	Rp2h	10090
A_51_P394921	0.3151	66330	1700020L24Rik	10090
A_51_P154379	0.316	231503	Tmem150c	10090
A_52_P263145	0.3162	75479	1700012D14Rik	10090
A_51_P497152	0.3163	14180	Fgf9	10090
A_51_P178772	0.3166	234564	Ces1f	10090
A_51_P201302	0.3171	259021	Olfr1054	10090
A_51_P204982	0.3176	258677	Olfr76	10090
A_52_P413976	0.318	434350	9430091E24Rik	10090
A_52_P151378	0.3184	280121	Rplp1-ps1	10090
A_51_P196663	0.3185	69142	Cd209f	10090
A_51_P435588	0.3187	20758	Sprr2d	10090
A_51_P407999	0.319	66236	1500011B03Rik	10090
A_52_P305230	0.319	230868	Igsf21	10090
A_51_P516148	0.3191	22066	Trpc4	10090
A_51_P253502	0.3195	12788	Cnga1	10090
A_51_P340336	0.3195	59093	Pcbp3	10090
A_51_P340699	0.3199	68895	Rasl11a	10090
A_51_P424690	0.32	58175	Rgs20	10090
A_51_P145631	0.3201	75744	Svip	10090
A_51_P215125	0.3203	258689	Olfr1466	10090
A_51_P300456	0.3209	69675	Pxdn	10090
A_51_P133097	0.3214	100042757	Gm4013	10090
A_51_P133097	0.3214	100046917
A_52_P788229	0.3215	66433	Chchd7	10090
A_52_P244381	0.3217	68037	2900093K20Rik	10090
A_52_P452599	0.3218	170752	Bco2	10090
A_52_P271495	0.3221	319650	A430108G06Rik	10090
A_51_P109692	0.3224	18332	Olfr33	10090
A_51_P155997	0.3225	77045	Bcl7a	10090
A_51_P237106	0.3228	258025	Olfr1211	10090
A_51_P268131	0.3239	74211	1700017B05Rik	10090
A_52_P126045	0.3241	68770	Phtf2	10090
A_51_P441643	0.3253	258922	Olfr267	10090
A_51_P345011	0.3272	545205	Olfr111	10090
A_51_P328354	0.328	259009	Olfr394	10090
A_51_P198053	0.3282	75526	Spinlw1	10090
A_51_P187352	0.3285	16531	Kcnma1	10090
A_51_P246104	0.3289	69423	1700019M22Rik	10090
A_51_P384033	0.3289	19165	Psen2	10090
A_51_P508580	0.3292	21407	Tcf15	10090
A_51_P328659	0.3293	257950	Olfr1039	10090
A_51_P204801	0.3294	12794	Cnih2	10090
A_51_P156222	0.3297	243312	Elfn1	10090
A_51_P317761	0.3297	11572	Crisp3	10090
A_52_P325621	0.3299	17314	Mgmt	10090
A_52_P685979	0.3303	73458	1700055N04Rik	10090
A_51_P182845	0.3304	73091	3110005L24Rik	10090
A_52_P220440	0.3304	103098	Slc6a15	10090
A_52_P650387	0.3304	380694	Ccnjl	10090
A_51_P438880	0.3307	258788	Olfr1246	10090
A_51_P330369	0.3312	99167	Ssx2ip	10090
A_51_P303147	0.3313	68231	H2afb1	10090
A_51_P503993	0.3315	207777	Bzrap1	10090
A_51_P484559	0.3317	75444	1700011I03Rik	10090
A_52_P352246	0.3319	20393	Sgk1	10090
A_51_P493709	0.332	72785	2810474C18Rik	10090
A_51_P407213	0.3322	13400	Dmpk	10090
A_51_P420457	0.3324	258259	Olfr1338	10090
A_52_P634009	0.3327	320382	E030030F06Rik	10090
A_52_P317653	0.3338	12346	Car1	10090
A_51_P194853	0.3348	103655	Sec14l4	10090
A_51_P346893	0.3352	56219	Extl1	10090
A_51_P167198	0.3353	258987	Olfr1270	10090
A_51_P454422	0.3357	217843	Unc79	10090
A_52_P834112	0.3358	70680	3021401N23Rik	10090
A_52_P233279	0.3363	319922	Vwc2	10090
A_52_P593986	0.3366	69149	Kbtbd3	10090
A_52_P220573	0.3379	20713	Serpini1	10090
A_51_P435339	0.3382	13857	Epor	10090
A_52_P53470	0.3385	328388	Gm10101	10090
A_51_P479138	0.3387	258540	Olfr771	10090
A_51_P484009	0.3394	13852	Stx2	10090
A_51_P150242	0.3396	258739	Olfr1362	10090
A_52_P440159	0.3396	74684	4930451G09Rik	10090
A_51_P387248	0.3403	106947	Slc39a3	10090
A_51_P428013	0.3405	72205	Eml2	10090
A_51_P302566	0.3406	109731	Maob	10090
A_51_P268391	0.3415	67133	Gp2	10090
A_52_P368021	0.3439	432508	Cpsf6	10090
A_51_P131175	0.3442	16511	Kcnh2	10090
A_51_P315820	0.3443	73106	Prssl1	10090
A_52_P314157	0.3443	73239	3110054G05Rik	10090
A_51_P318028	0.3444	258829	Olfr134	10090
A_51_P300717	0.3448	20910	Stxbp1	10090
A_51_P188352	0.3453	552912	LOC552912	10090
A_51_P411345	0.3456	233549	Mogat2	10090
A_51_P183111	0.3463	258955	Olfr531	10090
A_51_P446022	0.3468	233865	D430042O09Rik	10090
A_51_P454873	0.3468	109648	Npy	10090
A_52_P207335	0.3468	67063	2810432L12Rik	10090
A_52_P526607	0.3474	225583	A730017C20Rik	10090
A_52_P13730	0.3476	12416	Cbx2	10090
A_52_P794692	0.3477	503690	A930005G22Rik	10090
A_52_P462296	0.3479	12877	Cpeb1	10090
A_51_P160592	0.348	75809	4930488L21Rik	10090
A_52_P375435	0.348	320214	4932425I24Rik	10090
A_51_P338377	0.3485	107733	Mrpl41	10090
A_52_P439358	0.3488	16591	Kl	10090
A_51_P389216	0.349	76156	Fam131b	10090
A_51_P397983	0.3492	226999	Slc9a2	10090
A_51_P484753	0.3495	67887	Tmem66	10090
A_51_P231920	0.3501	214895	Lman2l	10090
A_51_P286959	0.3502	258241	Olfr1212	10090
A_52_P107225	0.3502	76886	Fam81a	10090
A_52_P136249	0.3506	381203	Slc22a20	10090
A_51_P183314	0.3509	258809	Olfr651	10090
A_52_P439420	0.3509	216881	Wscd1	10090
A_51_P329949	0.351	58909	Fam13a	10090
A_51_P170178	0.3515	232984	B3gnt8	10090
A_51_P149531	0.3517	258892	Olfr126	10090
A_52_P455251	0.3518	13797	Emx2	10090
A_51_P233846	0.3519	258342	Olfr1491	10090
A_52_P151240	0.3523	620393	Fam150a	10090
A_52_P331824	0.3523	269116	Nfasc	10090
A_52_P571109	0.3525	545447	Olfr1285	10090
A_52_P582619	0.354	320020	6330415G19Rik	10090
A_52_P671543	0.354	18976	Pomc	10090
A_52_P214416	0.3542	67163	Ccdc47	10090
A_52_P498608	0.3553	50887	Hmgn5	10090
A_52_P151905	0.3555	333452	Gm5132	10090
A_51_P436263	0.3558	258935	Olfr790	10090
A_51_P131840	0.3559	69362	Cst12	10090
A_51_P280384	0.3567	58226	Cacna1h	10090
A_51_P425334	0.3573	71826	1700001F09Rik	10090
A_51_P204387	0.3577	217733	Tmem63c	10090
A_51_P114941	0.3578	13113	Cyp3a13	10090
A_51_P447894	0.3578	331046	Tgm4	10090
A_52_P524426	0.358	13821	Epb4.1l1	10090
A_51_P504815	0.3583	20863	Stfa3	10090
A_52_P325237	0.3583	50779	Rgs6	10090
A_51_P304490	0.3586	257890	Olfr12	10090
A_51_P307721	0.359	12404	Cbln1	10090
A_52_P413560	0.359	320737	4732416N19Rik	10090
A_51_P212071	0.3592	258657	Olfr733	10090
A_52_P321000	0.3592	71492	Bbs7	10090
A_52_P656667	0.3594	386753	Dbpht2	10090
A_51_P451632	0.3595	381622	5031410I06Rik	10090
A_51_P514224	0.3602	18506	Pax4	10090
A_51_P259029	0.3624	66959	Dusp26	10090
A_51_P453569	0.3626	258323	Olfr943	10090
A_51_P499816	0.363	68371	Pbld1	10090
A_52_P173748	0.363	208169	Slc9a10	10090
A_52_P673978	0.3635	93683	Glce	10090
A_51_P185292	0.3638	78934	4930581F22Rik	10090
A_51_P442829	0.3641	100041695	Gm3474	10090
A_52_P262080	0.3643	84704	Snurf	10090
A_51_P221460	0.3646	66612	Ormdl3	10090
A_51_P497395	0.3646	72585	Lypd1	10090
A_51_P262773	0.3648	12558	Cdh2	10090
A_52_P446457	0.3648	433099	Ly6g6f	10090
A_52_P219853	0.3649	258461	Olfr1381	10090
A_52_P221588	0.3652	385328	Gm5382	10090
A_51_P124535	0.3653	17294	Mest	10090
A_51_P250689	0.3666	66459	Pigy	10090
A_51_P206573	0.3669	12287	Cacna1b	10090
A_51_P231320	0.3671	17394	Mmp8	10090
A_52_P618693	0.3683	20301	Ccl27a	10090
A_51_P377528	0.3684	18387	Oprk1	10090
A_51_P130803	0.3688	66360	Bbip1	10090
A_51_P205728	0.3693	258991	Olfr1496	10090
A_52_P77764	0.37	11988	Slc7a2	10090
A_52_P196161	0.3707	20404	Sh3gl2	10090
A_51_P380337	0.3726	71704	Arhgef3	10090
A_52_P303185	0.3727	75995	5033417F24Rik	10090
A_51_P436254	0.3738	68594	1110018F16Rik	10090
A_51_P390755	0.3741	399612	9630010G10Rik	10090
A_51_P466258	0.3743	258920	Olfr1180	10090
A_52_P183524	0.3745	68255	Tmem86b	10090
A_51_P181341	0.3746	117148	Necab2	10090
A_51_P188772	0.3751	110596	Rgnef	10090
A_51_P499061	0.3755	217342	Ube2o	10090
A_52_P252007	0.3761	100039851	Gm2459	10090
A_51_P302626	0.3763	21405	Hnf1a	10090
A_51_P458498	0.3763	259053	Olfr362	10090
A_51_P500692	0.3763	258776	Olfr715	10090
A_52_P480141	0.3765	18844	Plxna1	10090
A_52_P682341	0.3765	99470	Magi3	10090
A_52_P493493	0.3776	16924	Lnx1	10090
A_51_P265465	0.3785	106861	Abhd3	10090
A_51_P137042	0.3786	280621	BC089491	10090
A_52_P179158	0.3786	667060	Vmn2r5	10090
A_52_P603111	0.3786	240873	Tnfsf18	10090
A_51_P305140	0.3789	14857	Gsta1	10090
A_51_P257885	0.3792	75104	Mmd2	10090
A_51_P471362	0.3794	212733	Ccdc64b	10090
A_51_P388819	0.3797	170638	Hpcal4	10090
A_51_P450505	0.3804	257872	Olfr835	10090
A_51_P312452	0.3811	258595	Olfr698	10090
A_51_P310741	0.3815	258932	Olfr791	10090
A_51_P428305	0.3815	23919	Insl5	10090
A_52_P149017	0.3815	677375
A_51_P185869	0.3816	216635	Hbq1a	10090
A_51_P147802	0.3817	258724	Olfr784	10090
A_52_P470150	0.382	13195	Ddc	10090
A_52_P383754	0.3822	54158
A_51_P213334	0.3824	232232	Hdac11	10090
A_52_P327927	0.3826	68198	Ndufb2	10090
A_52_P568651	0.3833	236266	Alms1	10090
A_52_P686760	0.3833	14561	Gdf11	10090
A_51_P265016	0.3836	106369	Ypel1	10090
A_52_P293391	0.3836	75870	Tcam1	10090
A_51_P222815	0.3837	224656	Zfp523	10090
A_52_P103024	0.3838	320159	Fam179a	10090
A_52_P229959	0.3838	56526	2015-09-06	10090
A_52_P401473	0.3839	18208	Ntn1	10090
A_51_P275365	0.3847	258483	Olfr1411	10090
A_52_P345261	0.385	258620	Olfr350	10090
A_51_P357299	0.3859	258914	Olfr211	10090
A_51_P400581	0.388	66471	Anp32e	10090
A_51_P436813	0.388	74487	5430405H02Rik	10090
A_51_P136337	0.3883	319625	Galm	10090
A_52_P649786	0.3893	65257	Asb3	10090
A_51_P431885	0.3894	72685	Dnajc6	10090
A_51_P495269	0.3894	16939	Lor	10090
A_52_P143193	0.3897	30959	Ddx25	10090
A_51_P505823	0.3902	71946	Endod1	10090
A_51_P388498	0.3908	258585	Olfr1086	10090
A_51_P293729	0.3912	117198	Ivns1abp	10090
A_52_P282741	0.3919	20970	Sdc3	10090
A_52_P396271	0.3922	194590	Reps2	10090
A_52_P634930	0.3923	258612	Olfr303	10090
A_51_P108384	0.3927	68271	4930441O14Rik	10090
A_52_P495471	0.3934	68999	Anapc10	10090
A_52_P377492	0.394	259033	Olfr1122	10090
A_52_P224818	0.3941	210135	Zfp180	10090
A_52_P543660	0.3941	52023	Pibf1	10090
A_52_P333241	0.3943	77721	Mrps5	10090
A_51_P415475	0.3946	114255	Dok4	10090
A_51_P258710	0.3947	73863	4930415O20Rik	10090
A_52_P157170	0.3949	217340	Rnf157	10090
A_51_P221263	0.3952	74008	Arsg	10090
A_51_P390446	0.3956	217893	Pacs2	10090
A_52_P586944	0.3956	12167	Bmpr1b	10090
A_52_P536494	0.396	18109	Mycn	10090
A_52_P1069478	0.3966	100038570	Gm11744	10090
A_51_P281844	0.3967	17876	Myef2	10090
A_51_P486738	0.3968	14375	Xrcc6	10090
A_52_P619200	0.3969	327824	5330438D12Rik	10090
A_52_P235347	0.3972	56636	Fgf21	10090
A_52_P294305	0.3973	83557	Lin28a	10090
A_51_P507801	0.3976	74145	F13a1	10090
A_52_P225912	0.398	170639	Olfr78	10090
A_51_P134785	0.3981	258767	Olfr1176	10090
A_52_P655982	0.3983	18117	Cox4nb	10090
A_51_P303868	0.3987	208439	Klhl29	10090
A_51_P185971	0.399	12314	Calm2	10090
A_51_P441286	0.3991	219022	Ttc5	10090
A_52_P184395	0.3994	83766	Actl6b	10090
A_52_P631514	0.3995	11950	Atp5f1	10090
A_52_P410765	0.4	20361	Sema7a	10090
A_51_P497484	0.4001	244886	AI118078	10090
A_52_P971776	0.4014	78830	Slc25a12	10090
A_51_P355629	0.4029	14453	Gas2	10090
A_52_P676744	0.403	50935	St6galnac6	10090
A_52_P474024	0.4032	319974	Auts2	10090
A_51_P448091	0.4034	330463	Zfp78	10090
A_51_P160241	0.4039	18346	Olfr47	10090
A_51_P282630	0.404	80708	Pacsin3	10090
A_52_P447375	0.4047	12408	Cbr1	10090
A_51_P178815	0.4049	171506	H1foo	10090
A_51_P303437	0.4049	103817	AI662501	10090
A_51_P504028	0.405	20445	St6galnac1	10090
A_52_P239735	0.4052	20318	Sdf4	10090
A_52_P458682	0.4052	14858	Gsta2	10090
A_51_P228817	0.4058	29819	Stau2	10090
A_51_P307082	0.4061	15214	Hey2	10090
A_52_P445969	0.4062	69227	2810407C02Rik	10090
A_51_P202980	0.4063	77767	Ermn	10090
A_52_P533270	0.4063	69457	2310005G13Rik	10090
A_51_P393409	0.4064	319618	Dcp1b	10090
A_51_P280766	0.4065	241116	Ccdc108	10090
A_51_P497692	0.4066	75625	Mageh1	10090
A_51_P455866	0.4078	13711	Elf5	10090
A_51_P161308	0.4088	20518	Slc22a2	10090
A_51_P437327	0.4093	17172	Ascl1	10090
A_52_P259214	0.4094	12540	Cdc42	10090
A_51_P288618	0.4095	72102	Dusp11	10090
A_52_P597696	0.4096	18080	Nin	10090
A_51_P419959	0.4098	74427	Eaf1	10090
A_51_P299475	0.4099	258939	Olfr63	10090
A_51_P376883	0.4102	76411	1700019E19Rik	10090
A_52_P583050	0.4103	53951	Ccdc75	10090
A_52_P658974	0.411	385454	Gm5396	10090
A_52_P127569	0.4117	433931	Pigg	10090
A_52_P362311	0.412	100040563	Dynlt1c	10090
A_51_P276149	0.4121	258581	Olfr1030	10090
A_52_P14569	0.4127	67930	1700101I11Rik	10090
A_51_P264084	0.4132	76877	Rab36	10090
A_51_P452386	0.4143	258706	Olfr43	10090
A_52_P214936	0.4143	72199	Mms19	10090
A_51_P254542	0.4152	258150	Olfr792	10090
A_51_P241061	0.4159	319648	4732468M13Rik	10090
A_51_P428372	0.416	57349	Ppbp	10090
A_52_P590661	0.416	13631	Eef2k	10090
A_51_P250088	0.4161	258551	Olfr866	10090
A_52_P18887	0.4165	20755	Sprr2a1	10090
A_52_P107542	0.4174	75665	Ccdc64	10090
A_51_P409311	0.4176	228796	Bpil3	10090
A_52_P614777	0.4186	84112	Sucnr1	10090
A_52_P67444	0.4187	23806	Arih1	10090
A_51_P136620	0.419	258778	Olfr921	10090
A_52_P362449	0.4191	100038509	Gm10544	10090
A_51_P268914	0.4196	19946	Rpl30	10090
A_52_P500202	0.4199	209512	Taar2	10090
A_52_P63029	0.4204	68730	Dus1l	10090
A_52_P676198	0.4204	67017	2010011I20Rik	10090
A_51_P233072	0.4205	244180	E030002O03Rik	10090
A_52_P770640	0.4206	100047044	LOC100047044	10090
A_52_P393515	0.421	258481	Olfr137	10090
A_51_P339200	0.4212	193742	Abhd16a	10090
A_51_P352245	0.4212	20358	Sema6a	10090
A_51_P137188	0.4218	171183	Vmn1r37	10090
A_52_P516962	0.4218	258394	Olfr1328	10090
A_51_P243157	0.4219	258736	Olfr1497	10090
A_51_P425962	0.4219	13992	Khdrbs3	10090
A_51_P315144	0.422	56384	Letm1	10090
A_52_P236813	0.4221	66799	Ube2w	10090
A_52_P641107	0.4222	258232	Olfr774	10090
A_51_P125385	0.4226	83409	Robld3	10090
A_51_P485828	0.4226	13496	Arid3a	10090
A_52_P686136	0.423	227723	Prrc2b	10090
A_52_P308386	0.4234	14356	Fxc1	10090
A_52_P357533	0.4237	224014	Fgd4	10090
A_51_P133105	0.4241	71469	8430416G17Rik	10090
A_52_P664884	0.4244	22404	Wiz	10090
A_52_P480544	0.4248	212999	Tnpo2	10090
A_51_P433837	0.4257	73102	Slc22a23	10090
A_51_P232649	0.4258	258350	Olfr706	10090
A_51_P272493	0.4258	227693	Zer1	10090
A_52_P179011	0.4258	321008	6330408A02Rik	10090
A_52_P328825	0.426	69368	Wdfy1	10090
A_52_P546699	0.4263	258097	Olfr1500	10090
A_51_P112932	0.4264	12496	Entpd2	10090
A_52_P150588	0.4266	67332	Snrpd3	10090
A_52_P30877	0.4279	382421	Gm5176	10090
A_52_P390572	0.4288	381334	Gal3st2	10090
A_52_P429534	0.4293	15568	Elavl1	10090
A_52_P130727	0.4294	223732	Ldoc1l	10090
A_51_P413216	0.4295	257915	Olfr1016	10090
A_51_P448762	0.4305	22165	Txk	10090
A_51_P268094	0.4306	20720	Serpine2	10090
A_52_P201551	0.4306	215690	Nav1	10090
A_52_P600448	0.4312	328919	9530053H22	10090
A_51_P133582	0.4315	12418	Cbx4	10090
A_51_P258690	0.4316	20284	Scrg1	10090
A_51_P336544	0.4317	68149	Otub2	10090
A_51_P104430	0.4318	107528	Magee1	10090
A_51_P173114	0.4323	170677	Cdhr1	10090
A_51_P440865	0.4324	242297	Fam110b	10090
A_51_P502888	0.4326	17977	Ncoa1	10090
A_52_P499683	0.4328	71592	Pogk	10090
A_52_P677276	0.4329	101100	Ttll3	10090
A_51_P362818	0.4332	101613	Nlrp6	10090
A_51_P291304	0.4333	72347	2210011G09Rik	10090
A_51_P115376	0.4335	258060	Olfr1181	10090
A_51_P252199	0.4336	236792	Mmgt1	10090
A_51_P365482	0.4336	230673	Ipo13	10090
A_52_P302345	0.4336	102294	Cyp4v3	10090
A_52_P109430	0.4337	238875	Gapt	10090
A_51_P475015	0.434	244187	Olfr684	10090
A_51_P128356	0.4345	70545	5730433N10Rik	10090
A_52_P604926	0.4347	209351	Wfdc6a	10090
A_52_P309022	0.436	13134	Dach1	10090
A_52_P350750	0.436	11438	Chrna4	10090
A_51_P383399	0.4364	26358	Aldh1a7	10090
A_52_P440885	0.4364	320378	9630023C09Rik	10090
A_51_P154295	0.4366	258710	Olfr419	10090
A_51_P335758	0.4373	108699	Chn1	10090
A_52_P1180506	0.4373	100039284	Gm2137	10090
A_52_P27810	0.438	52323	Klhl7	10090
A_51_P417279	0.4381	106264	0610012G03Rik	10090
A_51_P483544	0.4381	30956	Aass	10090
A_52_P167357	0.4381	217371	Rab40b	10090
A_52_P388187	0.4381	258474	Olfr890	10090
A_52_P548755	0.4381	224118
A_52_P573377	0.4381	20603	Sms	10090
A_52_P352541	0.4385	100038371	Zfp389	10090
A_51_P219849	0.4387	67574	Alg13	10090
A_51_P303728	0.4388	246196	Zfp277	10090
A_52_P214034	0.4394	56873	Lmbr1	10090
A_51_P445260	0.4396	75647	1700025E21Rik	10090
A_52_P659241	0.4398	258601	Olfr984	10090
A_52_P23379	0.4409	211896	Depdc7	10090
A_52_P112139	0.441	227738	Lrsam1	10090
A_52_P433962	0.4411	319398	D330005C11Rik	10090
A_51_P167971	0.4415	23821	Bace1	10090
A_51_P256933	0.4417	67587	4930520K10Rik	10090
A_51_P441199	0.4418	18316	Olfr19	10090
A_52_P484194	0.4418	17082	Il1rl1	10090
A_52_P621588	0.4419	242700	Il28ra	10090
A_51_P418259	0.4421	66904	Pccb	10090
A_51_P453158	0.4427	215378	Fam5c	10090
A_51_P281912	0.4429	70713	Gpr137c	10090
A_52_P13680	0.4436	109149
A_51_P160042	0.444	209032	Zc3hav1l	10090
A_52_P374754	0.4445	258396	Olfr1305	10090
A_52_P115579	0.445	268882	Fbxo45	10090
A_51_P177015	0.4461	258802	Olfr143	10090
A_51_P460844	0.4461	233016	Blvrb	10090
A_51_P452702	0.4464	75547	Akap13	10090
A_51_P235945	0.4468	15439	Hp	10090
A_51_P114094	0.4471	232370	Clstn3	10090
A_51_P209163	0.4472	24109	Ubl3	10090
A_52_P69020	0.4474	317750	Slc24a5	10090
A_51_P356536	0.4475	77698	9230110I02Rik	10090
A_52_P639540	0.4478	75734	Mff	10090
A_51_P413614	0.4483	11304	Abca4	10090
A_51_P451799	0.4483	56226	Espn	10090
A_52_P529400	0.4483	68808	1110046J04Rik	10090
A_51_P264388	0.4485	30957	Mapk8ip3	10090
A_51_P483908	0.4488	13191	Dctn1	10090
A_51_P156274	0.449	17000	Ltbr	10090
A_52_P197402	0.4493	74694	Tbc1d30	10090
A_52_P543947	0.4513	214552	Cep164	10090
A_52_P557265	0.4521	56050	Cyp39a1	10090
A_52_P1059678	0.4522	319689	LOC319689	10090
A_51_P220422	0.4526	23969	Pacsin1	10090
A_51_P348922	0.4526	258923	Olfr1	10090
A_51_P122660	0.4528	239759	Liph	10090
A_52_P334499	0.4531	258478	Olfr183	10090
A_52_P403246	0.4538	68127	B230217C12Rik	10090
A_52_P238019	0.4539	66156	Anapc11	10090
A_52_P338134	0.4539	73798	4930402I19Rik	10090
A_51_P234847	0.4541	69315	1700001L19Rik	10090
A_52_P357309	0.4543	228355	Madd	10090
A_51_P304757	0.4545	57436	Gabarapl1	10090
A_52_P852120	0.4547	319225
A_51_P162437	0.4549	110279	Bcr	10090
A_52_P557170	0.4549	258429	Olfr996	10090
A_52_P413646	0.455	12161	Bmp6	10090
A_51_P294535	0.4551	107449	Unc5b	10090
A_51_P107463	0.4552	320522	Bhlha9	10090
A_51_P346938	0.4555	76905	Lrg1	10090
A_51_P165451	0.4556	67307	Pbld2	10090
A_51_P401876	0.4559	72320	2510003E04Rik	10090
A_52_P307717	0.4566	76132	6230409E13Rik	10090
A_52_P195235	0.4569	108978	4930555G01Rik	10090
A_52_P232935	0.457	69894	2010107G23Rik	10090
A_52_P16232	0.4572	54393	Gabbr1	10090
A_51_P286106	0.4574	76000	5033430I15Rik	10090
A_52_P640194	0.4574	212390	Klhl32	10090
A_51_P330580	0.4576	17259	Mef2b	10090
A_51_P259186	0.4578	69312	Lrrc67	10090
A_51_P285137	0.4582	235380	Dmxl2	10090
A_51_P284442	0.4583	68283	9530077C05Rik	10090
A_51_P279064	0.4593	224807	Tmem63b	10090
A_52_P218009	0.4593	20168	Rtn3	10090
A_51_P360092	0.4594	258645	Olfr418-ps1	10090
A_52_P344160	0.4598	101565	6330503K22Rik	10090
A_51_P448805	0.46	22625	Ysk4	10090
A_51_P317620	0.4604	268354	Fam19a2	10090
A_51_P304397	0.4605	70574	Cpm	10090
A_52_P155124	0.4607	381067	Zfp229	10090
A_51_P176054	0.4608	101490	Inpp5f	10090
A_51_P214187	0.4608	13162	Slc6a3	10090
A_52_P558609	0.4609	74374	Clec16a	10090
A_51_P120066	0.461	414085	9330151L19Rik	10090
A_51_P256884	0.4616	244654	Mtss1l	10090
A_51_P334532	0.4616	72913	2900006A17Rik	10090
A_52_P676469	0.4616	211586	Tfdp2	10090
A_51_P289131	0.4618	13404	Dmc1	10090
A_51_P497006	0.4619	94224	Srd5a2	10090
A_51_P285462	0.4626	258273	Olfr1394	10090
A_52_P446200	0.4627	51938	Ccdc39	10090
A_51_P243750	0.463	26934	Racgap1	10090
A_51_P459465	0.463	77480	Kidins220	10090
A_51_P479645	0.4631	227526	Cdnf	10090
A_51_P215275	0.4632	15372	Hmx2	10090
A_51_P469233	0.4632	17918	Myo5a	10090
A_51_P199124	0.4635	258985	Olfr1256	10090
A_51_P438293	0.4638	98463
A_52_P365528	0.4638	231912	Katnal1	10090
A_51_P183051	0.4645	103149	Upb1	10090
A_51_P402393	0.4646	246293	Klhl8	10090
A_52_P301486	0.4647	320622	B930068K11Rik	10090
A_51_P116946	0.4649	140494	Atp6v0a4	10090
A_51_P336325	0.4649	18405	Orm1	10090
A_51_P486432	0.465	75400	Defb29	10090
A_51_P487175	0.465	20216	Acsm3	10090
A_51_P215190	0.4651	78767	2610021K21Rik	10090
A_52_P188172	0.4652	20975	Synj2	10090
A_51_P511112	0.4655	14958	H1f0	10090
A_52_P276430	0.4662	108653	Rimklb	10090
A_52_P359061	0.4663	18645	Pfn2	10090
A_52_P116264	0.4665	76187	Adhfe1	10090
A_52_P97300	0.467	104015	Synj1	10090
A_51_P207693	0.4671	232813	Shisa7	10090
A_52_P361611	0.4671	268469	Zfp652	10090
A_51_P491017	0.4674	214505	Gnptg	10090
A_51_P417016	0.4676	20383	Srsf3	10090
A_52_P194990	0.4677	76645	Pkd1l2	10090
A_52_P663757	0.4678	665113	Tnik	10090
A_52_P342828	0.468	235180	Fez1	10090
A_52_P516972	0.4686	258489	Olfr486	10090
A_51_P367763	0.4691	93834	Peli2	10090
A_51_P170651	0.4692	20353	Sema4c	10090
A_51_P431734	0.4694	330050	Fam185a	10090
A_51_P378789	0.4696	55985	Cxcl13	10090
A_52_P134195	0.4701	26366	Ceacam10	10090
A_51_P237593	0.4702	11804	Aplp2	10090
A_51_P243323	0.4706	68646	1110020G09Rik	10090
A_51_P267986	0.4706	209224	Enox2	10090
A_51_P156849	0.4707	231474	Paqr3	10090
A_51_P376384	0.4707	258270	Olfr448	10090
A_51_P435466	0.471	258562	Olfr1014	10090
A_52_P508944	0.471	65246	Xpo7	10090
A_51_P255373	0.4723	67206	2810013P06Rik	10090
A_52_P1019763	0.4724	329217	Gm5101	10090
A_51_P386142	0.4726	29867	Cabp1	10090
A_52_P364021	0.4729	68393	Mogat1	10090
A_52_P591166	0.4733	12934	Dpysl2	10090
A_51_P314652	0.4736	320302	Glt28d2	10090
A_51_P249274	0.474	71775	1300017J02Rik	10090
A_51_P456266	0.474	22174	Tyro3	10090
A_52_P127184	0.474	74405	Efhc2	10090
A_52_P501077	0.4742	217219	Fam171a2	10090
A_51_P291388	0.4743	18472	Pafah1b1	10090
A_52_P425839	0.4745	245195	Retnlg	10090
A_51_P209930	0.475	20167	Rtn2	10090
A_51_P517870	0.4756	18018	Nfatc1	10090
A_51_P246816	0.476	108124	Napa	10090
A_51_P257832	0.476	22276	Uros	10090
A_52_P112676	0.4762	66264	Ccdc28b	10090
A_52_P284814	0.4764	103468	Nup107	10090
A_52_P922200	0.4764	72439	2610007B07Rik	10090
A_51_P136303	0.4765	106648	Cyp4f15	10090
A_52_P456750	0.4765	208117	Aph1b	10090
A_51_P362638	0.4768	22041	Trf	10090
A_51_P331570	0.477	228775	Trib3	10090
A_51_P117995	0.4774	18642	Pfkm	10090
A_51_P218292	0.4779	20840	Stac	10090
A_52_P184095	0.4781	109934	Abr	10090
A_51_P475689	0.4783	69165	Cd209b	10090
A_52_P27249	0.4785	21648	Dynlt1b	10090
A_51_P321150	0.4786	17105	Lyz2	10090
A_52_P389310	0.4786	53869	Rab11a	10090
A_52_P33382	0.4788	383229	Gm5226	10090
A_52_P480470	0.4788	216021	Stox1	10090
A_52_P739775	0.4793	208869	Dock3	10090
A_52_P86424	0.4796	14051	Eya4	10090
A_51_P366207	0.4799	17954	Nap1l2	10090
A_52_P84027	0.4799	13122	Cyp7a1	10090
A_51_P521283	0.48	12904	Crabp2	10090
A_52_P659762	0.4801	386655	Eid2	10090
A_51_P412225	0.4802	207592	Tbc1d16	10090
A_52_P267465	0.4805	18331	Olfr32	10090
A_52_P925277	0.4807	58208	Bcl11b	10090
A_52_P243391	0.4808	20355	Sema4f	10090
A_52_P685511	0.4809	76862	4833405L11Rik	10090
A_51_P324975	0.481	258772	Olfr821	10090
A_52_P428673	0.4812	224836	Usp49	10090
A_51_P296995	0.4814	20927	Abcc8	10090
A_51_P249516	0.4815	76213	6530406A20Rik	10090
A_52_P495565	0.4815	13643	Efnb3	10090
A_52_P5982	0.482	20480	Clpb	10090
A_51_P298514	0.4821	227743	Mapkap1	10090
A_51_P405280	0.4821	93691	Klf7	10090
A_51_P516036	0.4821	18357	Olfr57	10090
A_52_P69281	0.4823	108907	Nusap1	10090
A_52_P104091	0.4827	74011	Slc25a27	10090
A_51_P219970	0.4835	109901	Cela1	10090
A_51_P393999	0.4836	83485	Ngrn	10090
A_51_P493886	0.4836	108682	Gpt2	10090
A_52_P411358	0.4837	244349	Myst3	10090
A_52_P526396	0.4837	73991	Atl1	10090
A_52_P10181	0.484	109136	Mmaa	10090
A_52_P132554	0.484	67349	1700086P04Rik	10090
A_51_P281433	0.4841	77053	Sun1	10090
A_51_P231440	0.4844	72514	Fgfbp3	10090
A_51_P255853	0.4846	21349	Tal1	10090
A_51_P131751	0.4847	258903	Olfr1217	10090
A_52_P441855	0.4848	258406	Olfr462	10090
A_51_P197509	0.4861	245867	Pcmtd2	10090
A_52_P322514	0.4861	19726	Rfx3	10090
A_51_P264548	0.4864	66769	4933427E11Rik	10090
A_52_P648696	0.4869	16328	Cep250	10090
A_51_P226465	0.487	232934	Mypop	10090
A_52_P646680	0.4875	66689	Klhl28	10090
A_51_P422335	0.4876	233058	Zfp420	10090
A_52_P644465	0.4878	22631	Ywhaz	10090
A_52_P78699	0.4878	227632	Kcnt1	10090
A_51_P458873	0.4882	56491	Vapb	10090
A_51_P290050	0.4886	258377	Olfr654	10090
A_51_P364871	0.4886	258365	Olfr361	10090
A_52_P526379	0.4886	20908	Stx3	10090
A_52_P500979	0.4887	18548	Pcsk1	10090
A_51_P438057	0.4888	68240	Rpa3	10090
A_51_P345196	0.4891	67378	Bbs2	10090
A_52_P522754	0.4893	69072	Ebna1bp2	10090
A_51_P303749	0.4898	218581	Depdc1b	10090
A_51_P409250	0.49	193322	Oog1	10090
A_51_P513653	0.4901	258733	Olfr497	10090
A_51_P365604	0.4903	74530	9030612E09Rik	10090
A_52_P470373	0.4903	18099	Nlk	10090
A_52_P410383	0.4905	319264	A130006I12Rik	10090
A_51_P212515	0.4909	242083	Ppm1l	10090
A_51_P424954	0.491	402735	B230114P17Rik	10090
A_51_P413910	0.4912	15373	Hmx3	10090
A_51_P243036	0.4913	338370	Nalcn	10090
A_51_P468456	0.4914	20197	S100a3	10090
A_52_P542140	0.4915	102122	Fam192a	10090
A_52_P491433	0.4917	267019	Rps15a	10090
A_52_P67892	0.4918	50709	Hist1h1e	10090
A_51_P190863	0.4921	14365	Fzd3	10090
A_52_P362245	0.4921	66999	Med28	10090
A_51_P317131	0.4922	258451	Olfr1215	10090
A_51_P137800	0.4923	101744	C330005M16Rik	10090
A_51_P233768	0.4924	114644	Slc13a3	10090
A_52_P746983	0.4924	68328	Rab13	10090
A_51_P285779	0.493	72898	Asphd2	10090
A_51_P408649	0.493	219134	Shisa2	10090
A_51_P514379	0.4933	22775	Zik1	10090
A_52_P11920	0.494	240058	Cpne5	10090
A_51_P146044	0.4943	215707	Ccdc92	10090
A_51_P419726	0.4943	19280	Ptprs	10090
A_52_P339912	0.4945	170835	Inpp5j	10090
A_51_P358840	0.4949	72789	Veph1	10090
A_51_P322677	0.495	56405	Dusp14	10090
A_52_P463687	0.4951	101563	AI426330	10090
A_52_P157402	0.4955	381511	Pdp1	10090
A_52_P313007	0.496	258418	Olfr469	10090
A_52_P275069	0.4966	627821	Gm6792	10090
A_51_P320751	0.4967	258449	Olfr282	10090
A_51_P137913	0.4968	72961	Slc17a7	10090
A_52_P172405	0.497	319277	A230046K03Rik	10090
A_51_P290153	0.4971	258898	Olfr1205	10090
A_51_P123895	0.4977	27528	D0H4S114	10090
A_52_P628521	0.4977	105442	B130052P14Rik	10090
A_51_P244303	0.4978	140557	Smc1b	10090
A_51_P363818	0.498	56195	Ptbp2	10090
A_51_P224263	0.4981	104923	Adi1	10090
A_51_P235726	0.4981	78369	Icam4	10090
A_52_P321342	0.4982	76088	Dock8	10090
A_51_P274992	0.4985	68147	Gar1	10090
A_51_P141546	0.499	18406	Orm2	10090
A_51_P137953	0.4993	22235	Ugdh	10090
A_51_P235015	2.0003	70018	2010309G21Rik	10090
A_52_P517098	2.0004	16174	Il18rap	10090
A_52_P348879	2.0013	73417
A_51_P475155	2.0019	75234	Rnf19b	10090
A_51_P323583	2.0028	106389	Eaf2	10090
A_52_P160257	2.0031	19326	Rab11b	10090
A_52_P581390	2.0033	16562	Kif1c	10090
A_52_P430194	2.0039	228608	Smox	10090
A_52_P570471	2.0051	12978	Csf1r	10090
A_51_P333460	2.0054	71398	5430427O19Rik	10090
A_51_P166099	2.0058	56629	Dnase2b	10090
A_51_P373562	2.0058	14107	Fat1	10090
A_51_P102731	2.0068	654802	1700105P06Rik	10090
A_52_P326187	2.0074	240921	Gm4955	10090
A_52_P556448	2.0075	16679	Krt86	10090
A_51_P385639	2.0077	14622	Gjb5	10090
A_52_P51176	2.0077	74199	Vit	10090
A_51_P433450	2.008	16667	Krt17	10090
A_51_P119760	2.0085	14960	H2-Aa	10090
A_52_P623640	2.0096	77976	Nuak1	10090
A_52_P241640	2.0097	75379	4930599N23Rik	10090
A_51_P451606	2.0103	20682	Sox9	10090
A_51_P466781	2.0112	76378	Ropn1	10090
A_51_P383032	2.0127	17474	Clec4d	10090
A_51_P175681	2.0132	668139	Gm8995	10090
A_51_P363258	2.0132	70835	Prss22	10090
A_52_P113635	2.0132	320810	E030026E10Rik	10090
A_51_P138705	2.0135	19119	Prm2	10090
A_51_P272407	2.0135	107589	Mylk	10090
A_51_P189082	2.0144	83702	Akr1c6	10090
A_51_P198114	2.0152	214854	Neurl3	10090
A_51_P174407	2.0156	229600	BC028528	10090
A_52_P208763	2.0163	20306	Ccl7	10090
A_52_P415992	2.0165	73430	1700049G17Rik	10090
A_52_P425734	2.0168	280662	Afm	10090
A_51_P309370	2.017	74202	Fblim1	10090
A_52_P599917	2.0172	234135	Whsc1l1	10090
A_52_P20977	2.0173	52662	D18Ertd653e	10090
A_51_P296815	2.0175	238377	Gpr68	10090
A_52_P263658	2.018	15206	Hes2	10090
A_52_P447935	2.0185	15400	Hoxa3	10090
A_51_P186476	2.0188	18173	Slc11a1	10090
A_52_P417368	2.0188	13482	Dpp4	10090
A_52_P494930	2.0188	329679	Fnip2	10090
A_52_P638457	2.0197	327957	A430084P05Rik	10090
A_52_P475805	2.0198	12816	Col12a1	10090
A_52_P763167	2.0201	102366	BB211804	10090
A_51_P441022	2.0209	17127	Smad3	10090
A_52_P684242	2.0212	12825	Col3a1	10090
A_52_P601333	2.0216	67786	6230424C14Rik	10090
A_51_P233546	2.0217	23920	Insrr	10090
A_52_P227267	2.0218	98660	Atp1a2	10090
A_52_P164945	2.0224	381399	Gm1006	10090
A_51_P303851	2.0231	259058	Olfr646	10090
A_52_P460957	2.0232	12916	Crem	10090
A_52_P132761	2.0233	20852	Stat6	10090
A_52_P597461	2.0238	20482	Skil	10090
A_51_P520802	2.024	228788	BC020535	10090
A_52_P436318	2.0243	75617	Rps25	10090
A_51_P122481	2.0246	69333
A_51_P378870	2.0252	66873	Tril	10090
A_52_P625780	2.0257	16396	Itch	10090
A_51_P213260	2.0259	14464	Gata5	10090
A_52_P263644	2.0259	67204	Eif2s2	10090
A_51_P382152	2.0261	19124	Procr	10090
A_52_P293013	2.0262	12269	C4bp	10090
A_51_P461082	2.0267	331547	A230072E10Rik	10090
A_51_P372112	2.0273	23888	Gpc6	10090
A_52_P380124	2.0277	252966	Cables2	10090
A_52_P44824	2.0285	14710	Gngt2	10090
A_52_P980161	2.0285	331493	Gm5127	10090
A_52_P330289	2.0286	234515	Inpp4b	10090
A_52_P355222	2.0298	16565	Kif21b	10090
A_52_P493534	2.0299	269233	Fam171a1	10090
A_51_P463003	2.0305	53603	Tslp	10090
A_51_P219139	2.0309	330602	Gm5115	10090
A_51_P482820	2.0326	11448	Chrne	10090
A_51_P202772	2.033	381022	Mll2	10090
A_52_P277016	2.033	16184	Il2ra	10090
A_51_P474752	2.0353	171530	Ucn2	10090
A_51_P207380	2.0354	277496	4930526D03Rik	10090
A_52_P181856	2.0354	77097	Tanc2	10090
A_52_P267275	2.0363	71481	Alpk1	10090
A_52_P368650	2.0364	212168	Zswim4	10090
A_52_P117282	2.037	317652	Klk15	10090
A_52_P646684	2.0373	71345	Ano9	10090
A_51_P365704	2.0374	56293	Amac1	10090
A_52_P561161	2.0377	320560	Dennd5b	10090
A_52_P636427	2.0377	57757	Pglyrp2	10090
A_52_P172691	2.0378	320418	4732465E10Rik	10090
A_52_P55029	2.0382	11810	Apobec1	10090
A_52_P18060	2.0391	231207	Cpeb2	10090
A_52_P46384	2.0398	77056	Tmco4	10090
A_51_P183912	2.0402	50931	Il27ra	10090
A_52_P139579	2.0414	22375	Wars	10090
A_51_P268831	2.0418	227659	Slc2a6	10090
A_52_P149801	2.043	18578	Pde4b	10090
A_52_P678096	2.0437	235631	Prss50	10090
A_52_P553408	2.0438	319595	D130060J10Rik	10090
A_51_P514857	2.0445	17306	Sypl2	10090
A_51_P173331	2.0447	320207	Pik3r5	10090
A_52_P546513	2.0451	19065	Ppyr1	10090
A_52_P91823	2.0453	434198	B130024G19Rik	10090
A_51_P447595	2.0454	64706	Scube1	10090
A_51_P103364	2.0455	634594	LOC634594	10090
A_51_P218953	2.0458	243937	Zfp536	10090
A_51_P116906	2.0464	223864	Rapgef3	10090
A_51_P437089	2.0474	67410	4930449I24Rik	10090
A_51_P336049	2.0482	16671	Krt33b	10090
A_51_P387123	2.0483	23962	Oasl2	10090
A_52_P563825	2.0489	26877	B3galt1	10090
A_51_P233334	2.0492	20855	Stc1	10090
A_52_P181605	2.0496	67501	Ccdc50	10090
A_52_P152133	2.0498	15019	H2-Q8	10090
A_52_P75971	2.0513	68178	Cgnl1	10090
A_51_P179998	2.0516	140499	Ube2j2	10090
A_52_P149235	2.0517	385120	Gm1502	10090
A_52_P364140	2.0517	16402	Itga5	10090
A_52_P570679	2.0518	233090	Abpz	10090
A_51_P328652	2.0523	70025	Acot7	10090
A_51_P377342	2.053	227929	Cytip	10090
A_51_P136750	2.0531	52325	D7Ertd413e	10090
A_51_P221291	2.0537	20650	Sntb2	10090
A_52_P104658	2.054	16687	Krt6a	10090
A_51_P427099	2.0541	229725	Clcc1	10090
A_51_P293001	2.0547	69834	Rab43	10090
A_51_P117640	2.055	76082	5830468F06Rik	10090
A_52_P539440	2.055	99260	AV039307	10090
A_52_P255782	2.0561	101488	Slco2b1	10090
A_51_P126864	2.0566	58250	Chst11	10090
A_51_P450406	2.0566	666339	Muc3	10090
A_52_P141454	2.0568	232836	Galp	10090
A_51_P234113	2.0574	107607	Nod1	10090
A_52_P646366	2.0574	223642	Zc3h3	10090
A_51_P418935	2.0581	415115	Neurl2	10090
A_52_P324042	2.0586	20701	Serpina1b	10090
A_52_P332788	2.0601	100039742	Gm2397	10090
A_52_P392205	2.063	268481	Krt222	10090
A_51_P456952	2.0638	16186	Il2rg	10090
A_52_P625508	2.0645	12895	Cpt1b	10090
A_52_P361165	2.0653	11898	Ass1	10090
A_52_P581066	2.0654	71544	Arhgap42	10090
A_51_P331827	2.0655	103775	Slc25a41	10090
A_52_P601727	2.0668	12628	Cfh	10090
A_52_P35340	2.067	100559	Ugt2b38	10090
A_52_P123693	2.0671	78547	E130304I02Rik	10090
A_52_P300981	2.0671	54519	Apbb1ip	10090
A_51_P121607	2.0672	78931	4930546C10Rik	10090
A_51_P306387	2.0672	16635	Klra4	10090
A_51_P298196	2.0673	66435	Uggt2	10090
A_51_P277521	2.0674	76224	6530409C15Rik	10090
A_51_P404463	2.0676	78896	1500015O10Rik	10090
A_51_P445117	2.0703	22781	Ikzf4	10090
A_52_P295893	2.0704	320783	C130083B21Rik	10090
A_51_P484842	2.0711	11890	Asgr2	10090
A_52_P339019	2.0712	69656	Pir	10090
A_52_P478159	2.073	18440	P2rx6	10090
A_52_P883300	2.073	328443	E130202H07Rik	10090
A_51_P422457	2.0747	227120	Plcl1	10090
A_51_P397200	2.0753	192136	5033411D12Rik	10090
A_52_P203368	2.0764	83379	Klb	10090
A_51_P240077	2.0766	74295	1700092C17Rik	10090
A_51_P503896	2.078	209027	Pycr1	10090
A_51_P433870	2.0785	22341	Vegfc	10090
A_52_P78650	2.0791	320664	Cass4	10090
A_52_P205854	2.0798	217356	Tmc8	10090
A_51_P172935	2.0804	67328	Lyzl1	10090
A_51_P187561	2.0811	20473	Six3	10090
A_51_P236836	2.0814	244864	Layn	10090
A_51_P309968	2.0823	229459	Dchs2	10090
A_51_P389885	2.0824	20728	Spic	10090
A_51_P248293	2.0837	72504	Taf4b	10090
A_52_P8913	2.0841	208228	Mobkl2a	10090
A_52_P432647	2.0846	50723	Icosl	10090
A_51_P321286	2.0848	52874	D19Bwg1357e	10090
A_52_P521054	2.085	20725	Serpinb8	10090
A_51_P189292	2.0864	192157	Socs7	10090
A_52_P578732	2.0868	12774	Ccr5	10090
A_52_P308723	2.087	474332	Dnm3os	10090
A_52_P102953	2.0883	233545	2210018M11Rik	10090
A_52_P564413	2.0898	18705	Pik3c2g	10090
A_52_P541118	2.0907	319317	Snhg11	10090
A_52_P385006	2.0911	384619	Ccdc155	10090
A_52_P627177	2.0913	17698	Msn	10090
A_52_P655925	2.0914	353282	Sfmbt2	10090
A_52_P1026777	2.0916	68545	Ecscr	10090
A_51_P218984	2.0922	80285	Parp9	10090
A_51_P120717	2.0934	16906	Lmnb1	10090
A_52_P28960	2.0934	242316	Gdf6	10090
A_52_P640296	2.0937	71409	Fmnl2	10090
A_51_P344263	2.0941	118452	Baalc	10090
A_52_P80414	2.0942	100043133	9130023H24Rik	10090
A_52_P708792	2.0943	433637	Gm5547	10090
A_51_P143712	2.0955	58865	Tdh	10090
A_51_P154983	2.0956	63872	Zfp296	10090
A_52_P339703	2.0969	68968	Cdan1	10090
A_51_P147215	2.0981	69277	3300002I08Rik	10090
A_52_P375069	2.0984	235587	Parp3	10090
A_52_P676635	2.0995	28240	Trpm2	10090
A_52_P324882	2.0996	27052	Aoah	10090
A_52_P316841	2.1003	320372	A430057L12Rik	10090
A_51_P473734	2.1005	14998	H2-DMa	10090
A_51_P108459	2.1007	14744	Gpr65	10090
A_52_P183088	2.1011	18128	Notch1	10090
A_51_P284045	2.1015	194268	9930104L06Rik	10090
A_52_P8743	2.1023	215008	Vezt	10090
A_52_P980644	2.1024	14696	Gnb4	10090
A_51_P213077	2.1031	269959	Adamtsl3	10090
A_51_P263719	2.1033	171259	Vmn1r193	10090
A_52_P6187	2.1052	66190	Acer3	10090
A_51_P198675	2.1053	192653	Ttc36	10090
A_52_P463235	2.1057	67434	Ankrd33b	10090
A_51_P516705	2.1079	78943	Ern1	10090
A_51_P181517	2.108	246256	Fcgr4	10090
A_52_P240834	2.1087	214547	She	10090
A_51_P295806	2.1091	319197	Gpr4	10090
A_52_P334301	2.1094	245269	E130304F04Rik	10090
A_51_P332217	2.1098	234395	Ushbp1	10090
A_51_P461618	2.11	171171	Ntng2	10090
A_52_P645410	2.1101	80287	Apobec3	10090
A_52_P421344	2.1102	74090	Paqr5	10090
A_51_P469968	2.1106	14991	H2-M3	10090
A_52_P631240	2.1106	209630	Frmd4a	10090
A_52_P643674	2.1116	328187	A630043P06	10090
A_52_P659448	2.1128	100042802	AI463229	10090
A_52_P427607	2.1134	242100	Pglyrp3	10090
A_51_P178561	2.1146	85030	Tnfrsf25	10090
A_51_P400311	2.1146	75311	4930550C14Rik	10090
A_52_P91527	2.1147	54204	2015-09-01	10090
A_51_P131235	2.1149	19256	Ptpn20	10090
A_51_P348062	2.1155	14409	Gabrr2	10090
A_52_P552955	2.1157	13518	Dst	10090
A_52_P22611	2.1158	226866	Gm106	10090
A_52_P534560	2.1161	319710	Frmd6	10090
A_52_P624284	2.1165	330177	Taok3	10090
A_52_P235194	2.1166	94218	Cnnm3	10090
A_52_P2670	2.1172	19782	Rmrp	10090
A_51_P400366	2.1174	58176	Rhbg	10090
A_51_P204160	2.1187	233826	Palb2	10090
A_51_P164787	2.1195	71099	Tssk4	10090
A_51_P129199	2.1204	671535	Parp10	10090
A_51_P504988	2.121	237886	Slfn9	10090
A_52_P421234	2.1211	98711	Rdh10	10090
A_51_P211351	2.1213	258355	Olfr677	10090
A_52_P449214	2.1237	384514	Igkv4-57-1	10090
A_51_P499371	2.1238	22326	Vax1	10090
A_51_P389664	2.1239	545474	Scrt2	10090
A_52_P441294	2.1241	12661	Chl1	10090
A_51_P263471	2.1254	56620	Clec4n	10090
A_51_P174723	2.1255	12524	Cd86	10090
A_51_P340829	2.1257	212439	AA986860	10090
A_52_P246277	2.1262	633417	LOC633417	10090
A_52_P246277	2.1262	14964	H2-D1	10090
A_52_P230601	2.1268	73410	1700065D16Rik	10090
A_51_P403536	2.127	108075	Ltbp4	10090
A_51_P232207	2.1278	15414	Hoxb6	10090
A_51_P185247	2.1282	14560	Gdf10	10090
A_52_P614207	2.1284	100047222
A_51_P478132	2.1286	76957	2210019G11Rik	10090
A_51_P472867	2.1291	246727	Oas3	10090
A_51_P183197	2.131	67859	2310002J15Rik	10090
A_51_P141288	2.1323	16818	Lck	10090
A_51_P159503	2.1356	629974
A_52_P899303	2.1356	319319	B230214O09Rik	10090
A_52_P215207	2.1357	319973	A630077J23Rik	10090
A_51_P389636	2.1367	16534	Kcnn4	10090
A_51_P506483	2.1373	170721	Papln	10090
A_51_P283766	2.1374	72324	Plxdc1	10090
A_51_P172917	2.138	12763	Cmah	10090
A_51_P429692	2.1381	329727	Dennd2c	10090
A_52_P644114	2.1388	73254	Ccdc18	10090
A_52_P463962	2.1397	71369	Krtap16-10	10090
A_51_P123422	2.1413	68509	Ptx4	10090
A_52_P260114	2.1415	12369	Casp7	10090
A_51_P419286	2.1417	381319	Batf3	10090
A_52_P95294	2.1425	70571	Tcerg1l	10090
A_52_P591889	2.1426	634058	LOC634058	10090
A_52_P451024	2.1437	78016	Ccdc150	10090
A_52_P99341	2.1447	17263	Meg3	10090
A_51_P354265	2.1451	20723	Serpinb9	10090
A_51_P395686	2.1452	74749	5830405M20Rik	10090
A_51_P412579	2.1452	381339	Tmem182	10090
A_52_P351816	2.1455	16412	Itgb1	10090
A_52_P186262	2.1458	672450	LOC672450	10090
A_51_P457747	2.1462	16666	Krt16	10090
A_51_P486174	2.1466	20939	Sva	10090
A_51_P210970	2.1469	22416	Wnt3a	10090
A_52_P487647	2.1469	15499	Hsf1	10090
A_52_P329256	2.1472	14297	Fxn	10090
A_51_P195506	2.1473	12977	Csf1	10090
A_51_P351194	2.1496	72383	Cnfn	10090
A_51_P420731	2.1505	21838	Thy1	10090
A_52_P369780	2.1506	434459	Gm5622	10090
A_51_P324535	2.1531	56336	B4galt5	10090
A_51_P417998	2.1544	27359	Sytl4	10090
A_51_P206203	2.1556	211577	Mrgprf	10090
A_52_P644490	2.1564	67946	Spata6	10090
A_51_P205129	2.159	20312	Cx3cl1	10090
A_52_P612209	2.1616	60532	Wtap	10090
A_51_P315391	2.1619	378431	Txlnb	10090
A_51_P142767	2.1621	74782	Glt8d2	10090
A_51_P162008	2.1642	239337	Adamts12	10090
A_52_P272227	2.1648	213556	Plekhh2	10090
A_52_P238953	2.1653	329260	Dennd1b	10090
A_51_P343517	2.1676	17068	Ly6d	10090
A_51_P430903	2.168	100042057	Gm3643	10090
A_51_P326555	2.1683	67358	1700093K21Rik	10090
A_51_P414396	2.1692	105450	Mmrn2	10090
A_51_P139678	2.1705	20753	Sprr1a	10090
A_51_P439326	2.1721	216445	Arhgap9	10090
A_52_P291715	2.1727	230594	Zcchc11	10090
A_52_P112190	2.1732	100047053
A_51_P452323	2.1741	18008	Nes	10090
A_51_P339724	2.1746	69699	2310079G19Rik	10090
A_51_P349988	2.1753	14594	Ggta1	10090
A_52_P464592	2.1753	232566	Amn1	10090
A_52_P205001	2.1757	107526	Gimap4	10090
A_51_P288549	2.1765	433466	Jmjd7	10090
A_51_P457734	2.1766	13617	Ednra	10090
A_51_P297915	2.177	100061	Lrrc19	10090
A_52_P110877	2.177	23961	Oas1b	10090
A_52_P214861	2.1793	76687	Spcs3	10090
A_52_P10161	2.1817	19201	Pstpip2	10090
A_51_P147850	2.182	15111	Hand2	10090
A_52_P672496	2.182	102595	Plekho2	10090
A_51_P142861	2.1823	12362	Casp1	10090
A_51_P461877	2.183	21826	Thbs2	10090
A_51_P267861	2.1836	16529	Kcnk5	10090
A_52_P146877	2.184	14999	H2-DMb1	10090
A_51_P427383	2.1842	209086	Samd9l	10090
A_52_P131353	2.1843	227541	Camk1d	10090
A_52_P256099	2.1843	245049	Myrip	10090
A_52_P462657	2.186	217122	Gm11545	10090
A_52_P3784	2.1868	74646	Spsb1	10090
A_52_P607230	2.1873	17064	Cd93	10090
A_51_P316661	2.1875	19701	Ren1	10090
A_52_P900070	2.1875	791268	Gm10008	10090
A_51_P260889	2.1879	12502	Cd3g	10090
A_51_P408881	2.1879	56376	Pdlim5	10090
A_52_P31697	2.1899	11542	Adora3	10090
A_51_P183571	2.1903	18787	Serpine1	10090
A_51_P362514	2.1905	72500	Ier5l	10090
A_51_P219088	2.1928	225638	Alpk2	10090
A_52_P337086	2.1933	21825	Thbs1	10090
A_52_P408380	2.1944	80707	Wwox	10090
A_51_P443339	2.1948	102022	Ces2a	10090
A_52_P614453	2.196	71413	5430410E06Rik	10090
A_51_P478774	2.1975	504186	Chrna10	10090
A_52_P290069	2.1975	78126	1700001J04Rik	10090
A_51_P253883	2.1982	76820	Fam49a	10090
A_52_P564515	2.1986	268853	Gm671	10090
A_52_P580895	2.1989	74126	Syvn1	10090
A_51_P464710	2.1991	216991	Adap2	10090
A_52_P566548	2.1994	319949	A130009I22Rik	10090
A_52_P43326	2.2004	19736	Rgs4	10090
A_51_P511015	2.2032	14371	Fzd9	10090
A_51_P241068	2.2035	56811	Dkk2	10090
A_51_P198155	2.2042	75973	Ccdc162	10090
A_51_P408172	2.2051	68553	Col6a4	10090
A_51_P262131	2.2055	258693	Olfr1443	10090
A_51_P298023	2.206	72094	Ugt2a3	10090
A_52_P876623	2.206	77018	Col25a1	10090
A_51_P435830	2.2067	382077	Ccdc33	10090
A_51_P201226	2.2074	16848	Lfng	10090
A_51_P345298	2.2087	67765	5830432E09Rik	10090
A_52_P223809	2.2104	80861	Dhx58	10090
A_51_P203916	2.2165	14255	Flt3	10090
A_51_P126067	2.2179	12481	Cd2	10090
A_52_P205831	2.2191	21418	Tcfap2a	10090
A_51_P100327	2.2196	21354	Tap1	10090
A_51_P384318	2.2196	50909	C1ra	10090
A_52_P543489	2.2205	276950	Slfn8	10090
A_52_P324965	2.2224	208266	Dot1l	10090
A_52_P153265	2.2231	78610	Uvrag	10090
A_51_P118400	2.2237	74556	9130404H23Rik	10090
A_51_P440535	2.2242	74568	Mlkl	10090
A_52_P396312	2.2244	12557	Cdh17	10090
A_52_P628127	2.2255	68233	1700125D06Rik	10090
[truncated: 1,399 more rows]

## Sheet: Table S2
Supplemental Table S2 Differentially expressed olfactory receptor genes between the AC3-/- and AC3+/+ mice identified in the microarray hybridization.
Probe ID	Symbol	Fold change	Gene ID	Taxid	Synonyms	Description	Subfamilies1
A_51_P373498	Olfr572	0.132	259093	10090	MOR10-2	olfactory receptor 572	Class I
A_51_P109692	Olfr33	0.3224	18332	10090	MOR11-2	olfactory receptor 33	Class I
A_51_P443032	Olfr65	0.274	18365	10090	MOR1-2	olfactory receptor 65	Class I
A_51_P101022	Olfr640	0.0485	258819	10090	MOR13-4	olfactory receptor 640	Class I
A_51_P240624	Olfr642	0.2945	258326	10090	MOR13-6	olfactory receptor 642	Class I
A_51_P306243	Olfr623	0.1205	259126	10090	MOR1-4	olfactory receptor 623	Class I
A_52_P225912	Olfr78	0.398	170639	10090	MOR18-2	olfactory receptor 78	Class I
A_51_P488362	Olfr632	0.0973	259123	10090	MOR2-1	olfactory receptor 632	Class I
A_51_P416927	Olfr16	0.202	18313	10090	MOR23	olfactory receptor 16	Class I
A_51_P219888	Olfr599	0.2967	258726	10090	MOR23-1	olfactory receptor 599	Class I
A_51_P190721	Olfr598	0.0386	257975	10090	MOR23-5	olfactory receptor 598	Class I
A_51_P309804	Olfr584	0.3527	259056	10090	MOR30-2	olfactory receptor 584	Class I
A_51_P183314	Olfr651	0.3509	258809	10090	MOR31-11	olfactory receptor 651	Class I
A_51_P211064	Olfr690	0.1543	56860	10090	MOR31-2	olfactory receptor 690	Class I
A_51_P203943	Olfr652	0.275	259050	10090	MOR31-8	olfactory receptor 652	Class I
A_51_P216125	Olfr594	0.1395	258246	10090	MOR32-10	olfactory receptor 594	Class I
A_51_P332839	Olfr672	0.0326	258755	10090	MOR32-4	olfactory receptor 672	Class I
A_51_P235764	Olfr659	0.2118	259052	10090	MOR34-4	olfactory receptor 659	Class I
A_51_P216990	Olfr665	0.0882	258810	10090	MOR34-7	olfactory receptor 665	Class I
A_51_P290050	Olfr654	0.4886	258377	10090	MOR38-2	olfactory receptor 654	Class I
A_51_P338698	Olfr679	0.1828	259046	10090	MOR40-2	olfactory receptor 679	Class I
A_51_P475015	Olfr684	0.434	244187	10090	MOR40-8P	olfactory receptor 684	Class I
A_51_P240508	Olfr578	0.1897	259119	10090	MOR7-1	olfactory receptor 578	Class I
A_52_P538412	Olfr610	0.1937	259085	10090	MOR9-2	olfactory receptor 610	Class I
A_51_P301236	Olfr686	4.4224	259072	10090	MOR35-1	olfactory receptor 686	Class I
A_51_P352864	Olfr570	4.1762	259114	10090	MOR8-3	olfactory receptor 570	Class I
A_51_P211351	Olfr677	2.1213	258355	10090	MOR32-11	olfactory receptor 677	Class I
A_51_P303851	Olfr646	2.0231	259058	10090	MOR33-2	olfactory receptor 646	Class I
A_51_P317131	Olfr1215	0.4922	258451	10090	MOR233-13	olfactory receptor 1215	Class II
A_51_P186911	Olfr520	0.2691	259066	10090	MOR101-1	olfactory receptor 520	Class II
A_51_P359525	Olfr449	0.0812	259067	10090	MOR103-1	olfactory receptor 449	Class II
A_51_P330452	Olfr1414	0.0553	259041	10090	MOR103-2	olfactory receptor 1414	Class II
A_52_P404281	Olfr711	0.1623	259037	10090	MOR103-4	olfactory receptor 711	Class II
A_51_P138238	Olfr1348	0.1112	258915	10090	MOR103-9	olfactory receptor 1348	Class II
A_52_P175974	Olfr308	0.0778	258614	10090	MOR104-1	olfactory receptor 308	Class II
A_52_P634930	Olfr303	0.3923	258612	10090	MOR104-2	olfactory receptor 303	Class II
A_51_P372372	Olfr420	0.1491	258302	10090	MOR105-10	olfactory receptor 420	Class II
A_51_P430223	Olfr749	0.0574	56858	10090	MOR106-1	olfactory receptor 749	Class II
A_51_P430414	Olfr745	0.2786	258296	10090	MOR106-11	olfactory receptor 745	Class II
A_52_P605585	Olfr739	0.1662	258663	10090	MOR106-2	olfactory receptor 739	Class II
A_52_P549135	Olfr736	0.1415	258660	10090	MOR106-5	olfactory receptor 736	Class II
A_51_P254542	Olfr792	0.4152	258150	10090	MOR108-2	olfactory receptor 792	Class II
A_51_P324975	Olfr821	0.481	258772	10090	MOR109-1	olfactory receptor 821	Class II
A_51_P456699	Olfr812	0.2447	258791	10090	MOR110-1	olfactory receptor 812	Class II
A_51_P426817	Olfr801	0.091	258282	10090	MOR110-10	olfactory receptor 801	Class II
A_51_P147802	Olfr784	0.3817	258724	10090	MOR110-3	olfactory receptor 784	Class II
A_52_P533040	Olfr805	0.1498	258548	10090	MOR110-4	olfactory receptor 805	Class II
A_51_P426047	Olfr782	0.3059 0.2506	257985	10090	MOR110-8	olfactory receptor 782	Class II
A_51_P185275	Olfr787	0.0306	258069	10090	MOR111-10	olfactory receptor 787	Class II
A_52_P641107	Olfr774	0.4222	258232	10090	MOR111-11	olfactory receptor 774	Class II
A_52_P412362	Olfr788	0.1123	258544	10090	MOR111-4	olfactory receptor 788	Class II
A_51_P220837	Olfr786	0.2491	258542	10090	MOR111-5	olfactory receptor 786	Class II
A_52_P642360	Olfr1518	0.1996	258538	10090	MOR111-6	olfactory receptor 1518	Class II
A_51_P436263	Olfr790	0.3558	258935	10090	MOR112-1	olfactory receptor 790	Class II
A_52_P522849	Olfr816	0.0347	258667	10090	MOR113-1	olfactory receptor 816	Class II
A_51_P406204	Olfr822	0.1173	258666	10090	MOR113-2	olfactory receptor 822	Class II
A_52_P490071	Olfr810	0.237	258543	10090	MOR113-4	olfactory receptor 810	Class II
A_51_P310741	Olfr791	0.3815	258932	10090	MOR114-1	olfactory receptor 791	Class II
A_51_P286348	Olfr794	0.0662	258375	10090	MOR114-11	olfactory receptor 794	Class II
A_51_P239426	Olfr769	0.3084	257667	10090	MOR114-14	olfactory receptor 769	Class II
A_51_P325664	Olfr799	0.0914	258929	10090	MOR114-2	olfactory receptor 799	Class II
A_51_P450989	Olfr772	0.2504	257666	10090	MOR114-3	olfactory receptor 772	Class II
A_51_P479138	Olfr771	0.3387	258540	10090	MOR114-8	olfactory receptor 771	Class II
A_51_P389255	Olfr767	0.0671	258315	10090	MOR115-1	olfactory receptor 767	Class II
A_51_P218857	Olfr820	0.1373	258670	10090	MOR116-1	olfactory receptor 820	Class II
A_51_P163979	Olfr49	0.1063	18348	10090	MOR118-1	olfactory receptor 49	Class II
A_51_P308625	Olfr214	0.3056	258754	10090	MOR119-1	olfactory receptor 214	Class II
A_51_P105000	Olfr212	0.0048	258019	10090	MOR119-4	olfactory receptor 212	Class II
A_51_P287956	Olfr234	0.3617 2.1743	258502	10090	MOR122-1	olfactory receptor 234	Class II
A_51_P487062	Olfr1344	0.0051	257882	10090	MOR124-1	olfactory receptor 1344	Class II
A_51_P452386	Olfr43	0.4143	258706	10090	MOR125-1	olfactory receptor 43	Class II
A_51_P205728	Olfr1496	0.3693	258991	10090	MOR127-1	olfactory receptor 1496	Class II
A_51_P441120	Olfr351	0.1742	258944	10090	MOR127-2	olfactory receptor 351	Class II
A_52_P280938	Olfr353	0.2877	258943	10090	MOR127-3	olfactory receptor 353	Class II
A_51_P469777	Olfr1324	0.2331	258289	10090	MOR128-2	olfactory receptor 1324	Class II
A_51_P381329	Olfr406	0.1875	258181	10090	MOR133-1	olfactory receptor 406	Class II
A_51_P227239	Olfr380	0.2824	259027	10090	MOR135-1	olfactory receptor 380	Class II
A_52_P211150	Olfr20	0.0231	258925	10090	MOR135-11	olfactory receptor 20	Class II
A_51_P348922	Olfr1	0.4526	258923	10090	MOR135-13	olfactory receptor 1	Class II
A_51_P444920	Olfr22-ps1	0.3013	258209	10090	MOR135-18	olfactory receptor 22, pseudogene 1	Class II
A_52_P487379	Olfr390	0.0236	258344	10090	MOR135-26	olfactory receptor 390	Class II
A_51_P250178	Olfr23	0.0378	18321	10090	MOR135-27	olfactory receptor 23	Class II
A_51_P197274	Olfr393	0.0752	259010	10090	MOR135-7	olfactory receptor 393	Class II
A_51_P328354	Olfr394	0.328	259009	10090	MOR135-8	olfactory receptor 394	Class II
A_52_P345261	Olfr350	0.385	258620	10090	MOR136-13	olfactory receptor 350	Class II
A_51_P376207	Olfr342	0.1008	258950	10090	MOR136-4	olfactory receptor 342	Class II
A_51_P426708	Olfr365	0.0501	258656	10090	MOR138-1	olfactory receptor 365	Class II
A_52_P68633	Olfr366	0.217	236509	10090	MOR138-5P|MOR138-6	olfactory receptor 366	Class II
A_51_P516036	Olfr57	0.4821	18357	10090	MOR139-3	olfactory receptor 57	Class II
A_52_P253913	Olfr8	0.2205	18372	10090	MOR139-5P	olfactory receptor 8	Class II
A_51_P117015	Olfr1355	0.1988	257734	10090	MOR139-6	olfactory receptor 1355	Class II
A_51_P499223	Olfr1354	0.153	404502	10090	MOR139-7	olfactory receptor 1354	Class II
A_51_P441199	Olfr19	0.4418	18316	10090	MOR140-1	olfactory receptor 19	Class II
A_51_P201751	Olfr870	0.2855	57251	10090	MOR141-1|Olfr72	olfactory receptor 870	Class II
A_52_P669986	Olfr871	0.2269	258905	10090	MOR141-2	olfactory receptor 871	Class II
A_51_P363960	Olfr1356	0.144	258305	10090	MOR142-1|MOR142-2_p	olfactory receptor 1356	Class II
A_51_P180603	Olfr77	0.3128	258336	10090	MOR143-1	olfactory receptor 77	Class II
A_51_P433753	Olfr867	0.1629	257898	10090	MOR143-2	olfactory receptor 867	Class II
A_51_P345449	Olfr39	0.0661	258822	10090	MOR144-1	olfactory receptor 39	Class II
A_51_P250088	Olfr866	0.4161	258551	10090	MOR145-5	olfactory receptor 866	Class II
A_51_P427953	Olfr869	0.037	258550	10090	MOR145-6	olfactory receptor 869	Class II
A_52_P87763	Olfr860	0.0903	258521	10090	MOR146-2	olfactory receptor 860	Class II
A_51_P124694	Olfr58	0.325	18358	10090	MOR146-7P	olfactory receptor 58	Class II
A_51_P450505	Olfr835	0.3804	257872	10090	MOR150-3	olfactory receptor 835	Class II
A_52_P551771	Olfr849	0.2622	258520	10090	MOR151-1	olfactory receptor 849	Class II
A_51_P175549	Olfr843	0.0848	258560	10090	MOR155-2	olfactory receptor 843	Class II
A_52_P288951	Olfr99	0.1701	258508	10090	MOR156-1	olfactory receptor 99	Class II
A_52_P519620	Olfr97	0.0265	258505	10090	MOR156-2	olfactory receptor 97	Class II
A_51_P458498	Olfr362	0.3763	259053	10090	MOR158-1	olfactory receptor 362	Class II
A_52_P165575	Olfr360	0.0855	258615	10090	MOR159-1	olfactory receptor 360	Class II
A_51_P364871	Olfr361	0.4886	258365	10090	MOR159-3	olfactory receptor 361	Class II
A_51_P320751	Olfr282	0.4967	258449	10090	MOR160-2	olfactory receptor 282	Class II
A_51_P122116	Olfr874	0.0585	258882	10090	MOR161-2	olfactory receptor 874	Class II
A_51_P420577	Olfr983	0.0172	258824	10090	MOR162-1	olfactory receptor 983	Class II
A_52_P388187	Olfr890	0.4381	258474	10090	MOR162-3	olfactory receptor 890	Class II
A_51_P393718	Olfr887	0.2758	258415	10090	MOR162-5	olfactory receptor 887	Class II
A_51_P240425	Olfr918	0.0532	258372	10090	MOR164-3	olfactory receptor 918	Class II
A_51_P396225	Olfr910	0.0377	258807	10090	MOR165-3	olfactory receptor 910	Class II
A_51_P201400	Olfr912	0.0521	258806	10090	MOR165-4	olfactory receptor 912	Class II
A_51_P498909	Olfr907	0.1922	258801	10090	MOR165-5	olfactory receptor 907	Class II
A_51_P313432	Olfr914	0.1629	258782	10090	MOR165-7	olfactory receptor 914	Class II
A_51_P136620	Olfr921	0.419	258778	10090	MOR165-8	olfactory receptor 921	Class II
A_51_P347144	Olfr904	0.2713	258797	10090	MOR167-3	olfactory receptor 904	Class II
A_51_P403504	Olfr895	0.2221	258875	10090	MOR170-1	olfactory receptor 895	Class II
A_51_P177015	Olfr143	0.4461	258802	10090	MOR170-6	olfactory receptor 143	Class II
A_52_P672636	Olfr974	0.1591	259111	10090	MOR171-1	olfactory receptor 974	Class II
A_52_P85334	Olfr146	0.0704	258742	10090	MOR171-10	olfactory receptor 146	Class II
A_51_P173976	Olfr935	0.2218	258741	10090	MOR171-11	olfactory receptor 935	Class II
A_51_P472857	Olfr971	0.1384	258607	10090	MOR171-13	olfactory receptor 971	Class II
A_51_P356217	Olfr970	0.1244	258604	10090	MOR171-16	olfactory receptor 970	Class II
A_51_P339293	Olfr972	0.0968	258603	10090	MOR171-17	olfactory receptor 972	Class II
A_51_P518542	Olfr944	0.0632	258500	10090	MOR171-19	olfactory receptor 944	Class II
A_51_P200249	Olfr945	0.1264	258499	10090	MOR171-20	olfactory receptor 945	Class II
A_51_P447509	Olfr919	0.0955	258432	10090	MOR171-23	olfactory receptor 919	Class II
A_51_P150979	Olfr967	0.1009	258086	10090	MOR171-30P	olfactory receptor 967	Class II
A_51_P319470	Olfr951	0.0076	258046	10090	MOR171-33P	olfactory receptor 951	Class II
A_51_P302346	Olfr985	0.2067	258854	10090	MOR171-4	olfactory receptor 985	Class II
A_51_P436790	Olfr144	0.2749	257959	10090	MOR171-41P	olfactory receptor 144	Class II
A_52_P339748	Olfr947-ps1	0.207	257924	10090	MOR171-43	olfactory receptor 947, pseudogene 1	Class II
A_51_P453569	Olfr943	0.3626	258323	10090	MOR171-44	olfactory receptor 943	Class II
A_51_P151246	Olfr924	0.1073	404322	10090	MOR171-47	olfactory receptor 924	Class II
A_51_P257690	Olfr44	0.1364	18343	10090	MOR171-5	olfactory receptor 44	Class II
A_51_P253857	Olfr27	0.0546	258826	10090	MOR171-6	olfactory receptor 27	Class II
A_51_P207540	Olfr969	0.0802	258823	10090	MOR171-7	olfactory receptor 969	Class II
A_51_P356751	Olfr1052	0.0785	259012	10090	MOR172-1	olfactory receptor 1052	Class II
A_51_P182427	Olfr1107	0.2953	258841	10090	MOR172-2	olfactory receptor 1107	Class II
A_51_P139370	Olfr1110	0.02	258765	10090	MOR172-4	olfactory receptor 1110	Class II
A_51_P248008	Olfr1109	0.0703	258762	10090	MOR172-5	olfactory receptor 1109	Class II
A_51_P328522	Olfr1106	0.0655	258747	10090	MOR172-6|MOR172-8_p	olfactory receptor 1106	Class II
A_51_P499960	Olfr1157	0.1103	258846	10090	MOR174-1	olfactory receptor 1157	Class II
A_51_P134785	Olfr1176	0.3981	258767	10090	MOR174-5	olfactory receptor 1176	Class II
A_51_P316199	Olfr73	0.0638	117004	10090	MOR174-9	olfactory receptor 73	Class II
A_52_P557170	Olfr996	0.4549	258429	10090	MOR175-4	olfactory receptor 996	Class II
A_51_P471038	Olfr1000	0.0261	257899	10090	MOR175-9	olfactory receptor 1000	Class II
A_52_P71645	Olfr1140	0.0724	258635	10090	MOR177-6	olfactory receptor 1140	Class II
A_51_P411801	Olfr368	0.2988	258371	10090	MOR178-1	olfactory receptor 368	Class II
A_51_P388498	Olfr1086	0.3908	258585	10090	MOR179-2	olfactory receptor 1086	Class II
A_51_P424290	Olfr141	0.0832	257913	10090	MOR179-5	olfactory receptor 141	Class II
A_51_P178705	Olfr1093	0.0718	258363	10090	MOR179-6	olfactory receptor 1093	Class II
A_51_P442736	Olfr1094	0.1487	258362	10090	MOR179-7	olfactory receptor 1094	Class II
A_52_P439208	Olfr1019	0.1903	259017	10090	MOR180-1	olfactory receptor 1019	Class II
A_52_P171458	Olfr152	0.2567	258640	10090	MOR181-1	olfactory receptor 152	Class II
A_51_P407235	Olfr1111	0.09	258586	10090	MOR181-2	olfactory receptor 1111	Class II
A_51_P354419	Olfr202	0.2062	258997	10090	MOR182-1	olfactory receptor 202	Class II
A_51_P109298	Olfr201	0.1095	258996	10090	MOR182-2	olfactory receptor 201	Class II
A_51_P229483	Olfr206	0.0284	258993	10090	MOR182-4	olfactory receptor 206	Class II
A_51_P159641	Olfr203	0.1208	258479	10090	MOR182-5	olfactory receptor 203	Class II
A_51_P310836	Olfr208	0.0231	258382	10090	MOR182-6	olfactory receptor 208	Class II
A_52_P334499	Olfr183	0.4531	258478	10090	MOR183-2	olfactory receptor 183	Class II
A_51_P120975	Olfr193	0.3366	257972	10090	MOR183-7P	olfactory receptor 193	Class II
A_51_P386280	Olfr187	0.1508	258319	10090	MOR183-8	olfactory receptor 187	Class II
A_51_P390046	Olfr186	0.1568	258318	10090	MOR183-9	olfactory receptor 186	Class II
A_52_P522190	Olfr174	0.3234	259004	10090	MOR184-1	olfactory receptor 174	Class II
A_52_P659779	Olfr172	0.0334	259003	10090	MOR184-2	olfactory receptor 172	Class II
A_51_P255473	Olfr173	0.0509	259002	10090	MOR184-3	olfactory receptor 173	Class II
A_51_P120589	Olfr181	0.0167	259001	10090	MOR184-4	olfactory receptor 181	Class II
A_51_P251684	Olfr195	0.0243	259000	10090	MOR184-5	olfactory receptor 195	Class II
A_51_P399974	Olfr178	0.2405	258999	10090	MOR184-6	olfactory receptor 178	Class II
A_51_P178612	Olfr177	0.0416	258998	10090	MOR184-7	olfactory receptor 177	Class II
A_52_P74344	Olfr176	0.0215	258995	10090	MOR184-8	olfactory receptor 176	Class II
A_51_P248395	Olfr180	0.0433	258178	10090	MOR184-9	olfactory receptor 180	Class II
A_51_P474721	Olfr1057	0.1971	404325	10090	MOR185-11	olfactory receptor 1057	Class II
A_51_P150745	Olfr1044	0.2322	259013	10090	MOR185-4	olfactory receptor 1044	Class II
A_51_P328659	Olfr1039	0.3293	257950	10090	MOR185-5	olfactory receptor 1039	Class II
A_51_P310109	Olfr52	0.2479	18352	10090	MOR185-6	olfactory receptor 52	Class II
A_51_P133911	Olfr1043	0.2225	258570	10090	MOR185-7	olfactory receptor 1043	Class II
A_52_P342608	Olfr1051	0.2128	404324	10090	MOR187-5	olfactory receptor 1051	Class II
A_51_P201302	Olfr1054	0.3171	259021	10090	MOR188-2	olfactory receptor 1054	Class II
A_51_P259259	Olfr1090	0.3057	258844	10090	MOR188-4	olfactory receptor 1090	Class II
A_51_P180773	Olfr1087	0.0683	258843	10090	MOR188-5	olfactory receptor 1087	Class II
A_51_P195635	Olfr1079	0.1296	258402	10090	MOR189-1	olfactory receptor 1079	Class II
A_52_P680637	Olfr1076	0.1545	258401	10090	MOR189-2	olfactory receptor 1076	Class II
A_52_P213807	Olfr228	0.153	258400	10090	MOR189-3	olfactory receptor 228	Class II
A_51_P292957	Olfr1080	0.0283	258404	10090	MOR192-1	olfactory receptor 1080	Class II
A_51_P431684	Olfr1046	0.1168	258575	10090	MOR194-1	olfactory receptor 1046	Class II
A_51_P276149	Olfr1030	0.4121	258581	10090	MOR196-2	olfactory receptor 1030	Class II
A_51_P508394	Olfr1032	0.3111	258572	10090	MOR199-1	olfactory receptor 1032	Class II
A_52_P377454	Olfr1477	0.0414	258691	10090	MOR202-10	olfactory receptor 1477	Class II
A_51_P215125	Olfr1466	0.3203	258689	10090	MOR202-12	olfactory receptor 1466	Class II
A_51_P443642	Olfr1454	0.2096	258687	10090	MOR202-14	olfactory receptor 1454	Class II
A_51_P445467	Olfr1472	0.2696	258685	10090	MOR202-16	olfactory receptor 1472	Class II
A_52_P618947	Olfr1487	0.0421	258629	10090	MOR202-18	olfactory receptor 1487	Class II
A_51_P269485	Olfr1446	0.1615	258699	10090	MOR202-2	olfactory receptor 1446	Class II
A_51_P222115	Olfr1463	0.0418	258120	10090	MOR202-29P	olfactory receptor 1463	Class II
A_51_P252586	Olfr1484	0.026	258288	10090	MOR202-37	olfactory receptor 1484	Class II
A_51_P355652	Olfr1448	0.0512	258696	10090	MOR202-5	olfactory receptor 1448	Class II
A_51_P285592	Olfr994	0.1155	258425	10090	MOR203-4	olfactory receptor 994	Class II
A_52_P316368	Olfr987	0.102	257951	10090	MOR203-7P	olfactory receptor 987	Class II
A_51_P253426	Olfr494	0.2731	258732	10090	MOR204-10	olfactory receptor 494	Class II
A_52_P516972	Olfr486	0.4686	258489	10090	MOR204-19	olfactory receptor 486	Class II
A_51_P154115	Olfr481	0.0504	258927	10090	MOR204-2|MOR204-39	olfactory receptor 481	Class II
A_52_P313007	Olfr469	0.496	258418	10090	MOR204-21	olfactory receptor 469	Class II
A_51_P171510	Olfr487	0.1389	258042	10090	MOR204-29P	olfactory receptor 487	Class II
A_51_P344636	Olfr476	0.0873	258926	10090	MOR204-3	olfactory receptor 476	Class II
A_51_P147188	Olfr485	0.3025	258041	10090	MOR204-30P	olfactory receptor 485	Class II
A_51_P228182	Olfr472	0.1606	258770	10090	MOR204-5	olfactory receptor 472	Class II
A_51_P513653	Olfr497	0.4901	258733	10090	MOR204-9	olfactory receptor 497	Class II
A_51_P116896	Olfr1099	0.2743	258764	10090	MOR206-3	olfactory receptor 1099	Class II
A_51_P275365	Olfr1411	0.3847	258483	10090	MOR208-3	olfactory receptor 1411	Class II
A_51_P403728	Olfr1412	0.1639	258274	10090	MOR208-4	olfactory receptor 1412	Class II
A_51_P304490	Olfr12	0.3586	257890	10090	MOR208-5	olfactory receptor 12	Class II
A_52_P200365	Olfr825	0.1257	258672	10090	MOR210-1	olfactory receptor 825	Class II
A_52_P385526	Olfr826	0.135	258671	10090	MOR210-2	olfactory receptor 826	Class II
A_51_P208857	Olfr827	0.1828	258297	10090	MOR210-5	olfactory receptor 827	Class II
A_51_P170090	Olfr1499	0.0088	258792	10090	MOR211-2	olfactory receptor 1499	Class II
A_52_P503254	Olfr1505	0.2439	258151	10090	MOR211-4P	olfactory receptor 1505	Class II
A_51_P243157	Olfr1497	0.4219	258736	10090	MOR212-1	olfactory receptor 1497	Class II
A_51_P434190	Olfr1504	0.1296	258627	10090	MOR212-2	olfactory receptor 1504	Class II
A_52_P262124	Olfr1501	0.2688	258626	10090	MOR212-3	olfactory receptor 1501	Class II
A_52_P546699	Olfr1500	0.4263	258097	10090	MOR212-4P	olfactory receptor 1500	Class II
A_51_P128304	Olfr1006	0.2639	258563	10090	MOR213-4	olfactory receptor 1006	Class II
A_51_P435466	Olfr1014	0.471	258562	10090	MOR213-5	olfactory receptor 1014	Class II
A_51_P413216	Olfr1016	0.4295	257915	10090	MOR213-9	olfactory receptor 1016	Class II
A_51_P343443	Olfr1436	0.2152	258682	10090	MOR214-2	olfactory receptor 1436	Class II
A_52_P524988	Olfr1433	0.3083	258680	10090	MOR214-4	olfactory receptor 1433	Class II
A_52_P122461	Olfr1437	0.1217	258117	10090	MOR214-6	olfactory receptor 1437	Class II
A_51_P146843	Olfr1440	0.1015	258679	10090	MOR215-1	olfactory receptor 1440	Class II
A_51_P204982	Olfr76	0.3176	258677	10090	MOR215-3	olfactory receptor 76	Class II
A_51_P149531	Olfr126	0.3517	258892	10090	MOR218-1	olfactory receptor 126	Class II
A_51_P434928	Olfr114	0.2145	258284	10090	MOR218-10	olfactory receptor 114	Class II
A_51_P184648	Olfr761	0.1468	258094	10090	MOR218-12	olfactory receptor 761	Class II
A_51_P391897	Olfr125	0.1963	258287	10090	MOR218-8	olfactory receptor 125	Class II
A_51_P208340	Olfr113	0.0796	258286	10090	MOR218-9	olfactory receptor 113	Class II
A_51_P183401	Olfr295	0.1692	258850	10090	MOR220-1	olfactory receptor 295	Class II
A_52_P286278	Olfr297	0.1269	258611	10090	MOR220-3	olfactory receptor 297	Class II
A_51_P458707	Olfr299	0.2765	257929	10090	MOR221-2	olfactory receptor 299	Class II
A_51_P283447	Olfr1510	0.2733	258423	10090	MOR223-6	olfactory receptor 1510	Class II
A_51_P122452	Olfr1511	0.2138	258268	10090	MOR223-9	olfactory receptor 1511	Class II
A_51_P387388	Olfr960	0.2589	258276	10090	MOR224-12	olfactory receptor 960	Class II
A_51_P466731	Olfr959	0.2512	258501	10090	MOR224-3	olfactory receptor 959	Class II
A_51_P230055 A_52_P152179	Olfr961	0.3775 0.3826	258497	10090	MOR224-5	olfactory receptor 961	Class II
A_52_P527697	Olfr934	0.2217	258434	10090	MOR224-6	olfactory receptor 934	Class II
A_51_P132101	Olfr958	0.1953	258327	10090	MOR224-9	olfactory receptor 958	Class II
A_51_P466258	Olfr1180	0.3743	258920	10090	MOR225-1	olfactory receptor 1180	Class II
A_51_P247103	Olfr1208	0.1834	258774	10090	MOR225-4	olfactory receptor 1208	Class II
A_51_P115376	Olfr1181	0.4335	258060	10090	MOR225-9P	olfactory receptor 1181	Class II
A_51_P467438	Olfr1193	0.2409	329460	10090	MOR226-1	olfactory receptor 1193	Class II
A_51_P167198	Olfr1270	0.3353	258987	10090	MOR227-1	olfactory receptor 1270	Class II
A_51_P330647	Olfr1273	0.2356	258977	10090	MOR227-4	olfactory receptor 1273	Class II
A_51_P361958	Olfr1271	0.1831	258789	10090	MOR227-5	olfactory receptor 1271	Class II
A_52_P267465	Olfr32	0.4805	18331	10090	MOR227-7P	olfactory receptor 32	Class II
A_51_P290153	Olfr1203	0.4971	258898	10090	MOR230-1	olfactory receptor 1203	Class II
A_51_P440030	Olfr1195	0.2002	258748	10090	MOR230-4	olfactory receptor 1195	Class II
A_52_P136026	Olfr1199	0.1675	258450	10090	MOR230-8	olfactory receptor 1199	Class II
A_51_P199124	Olfr1256	0.4635	258985	10090	MOR231-1	olfactory receptor 1256	Class II
A_51_P504735	Olfr1248	0.0108	258787	10090	MOR231-10	olfactory receptor 1248	Class II
A_51_P124209	Olfr1238	0.105	258786	10090	MOR231-11	olfactory receptor 1238	Class II
A_52_P482030	Olfr1254	0.028	258468	10090	MOR231-13	olfactory receptor 1254	Class II
A_51_P126089	Olfr1241	0.1641	258447	10090	MOR231-14	olfactory receptor 1241	Class II
A_51_P324623	Olfr1234	0.183	258975	10090	MOR231-2	olfactory receptor 1234	Class II
A_51_P276508	Olfr1239	0.0539	258972	10090	MOR231-3	olfactory receptor 1239	Class II
A_51_P392055	Olfr1242	0.1227	258970	10090	MOR231-5	olfactory receptor 1242	Class II
A_51_P283323	Olfr1247	0.0975	258968	10090	MOR231-6	olfactory receptor 1247	Class II
A_51_P160143	Olfr1250	0.0387	258967	10090	MOR231-7	olfactory receptor 1250	Class II
A_51_P116725	Olfr1240	0.1659	258804	10090	MOR231-8	olfactory receptor 1240	Class II
A_51_P438880	Olfr1246	0.3307	258788	10090	MOR231-9	olfactory receptor 1246	Class II
A_51_P305854	Olfr1258	0.0917	258980	10090	MOR232-3	olfactory receptor 1258	Class II
A_51_P422042	Olfr1255	0.1464	258979	10090	MOR232-4	olfactory receptor 1255	Class II
A_52_P141387	Olfr1202	0.0661	258454	10090	MOR232-7	olfactory receptor 1202	Class II
A_52_P317608	Olfr1349	0.1158	269862	10090	MOR232-8	olfactory receptor 1349	Class II
A_51_P380824	Olfr1225	0.1171	258893	10090	MOR233-11	olfactory receptor 1225	Class II
A_51_P312024	Olfr1222	0.0482	258177	10090	MOR233-14	olfactory receptor 1222	Class II
A_51_P237106	Olfr1211	0.3228	258025	10090	MOR233-16P|MOR233-21	olfactory receptor 1211	Class II
A_51_P286959	Olfr1212	0.3502	258241	10090	MOR233-17|MOR233-20	olfactory receptor 1212	Class II
A_51_P502492	Olfr1232	0.1849	258320	10090	MOR233-18	olfactory receptor 1232	Class II
A_51_P358700	Olfr1221	0.1159	258904	10090	MOR233-3	olfactory receptor 1221	Class II
A_51_P131751	Olfr1217	0.4847	258903	10090	MOR233-4	olfactory receptor 1217	Class II
A_51_P163901	Olfr1219	0.078	258901	10090	MOR233-6	olfactory receptor 1219	Class II
A_51_P365844	Olfr1216	0.047	258895	10090	MOR233-9	olfactory receptor 1216	Class II
A_51_P371411	Olfr1262	0.0819	258976	10090	MOR234-1	olfactory receptor 1262	Class II
A_51_P390744	Olfr1261	0.2349	258466	10090	MOR234-3	olfactory receptor 1261	Class II
A_51_P407811	Olfr140	0.0113	57272	10090	MOR235-1	olfactory receptor 140	Class II
A_51_P473363	Olfr1264	0.1794	258206	10090	MOR236-1	olfactory receptor 1264	Class II
A_51_P350069	Olfr1189	0.1766	258768	10090	MOR237-2	olfactory receptor 1189	Class II
A_51_P466970	Olfr1233	0.0862	258974	10090	MOR238-1	olfactory receptor 1233	Class II
A_51_P457759	Olfr1426	0.1438	258805	10090	MOR239-1	olfactory receptor 1426	Class II
A_51_P179056	Olfr1424	0.023	258676	10090	MOR239-2	olfactory receptor 1424	Class II
A_51_P159986	Olfr1423	0.2019	258675	10090	MOR239-3	olfactory receptor 1423	Class II
A_52_P50207	Olfr1427	0.1167	258674	10090	MOR239-4	olfactory receptor 1427	Class II
A_51_P163713	Olfr1428	0.0991	258673	10090	MOR239-5	olfactory receptor 1428	Class II
A_52_P659241	Olfr984	0.4398	258601	10090	MOR239-6	olfactory receptor 984	Class II
A_52_P441855	Olfr462	0.4848	258406	10090	MOR240-3	olfactory receptor 462	Class II
A_51_P212071	Olfr733	0.3592	258657	10090	MOR241-2	olfactory receptor 733	Class II
A_52_P457924	Olfr734	0.0502	258658	10090	MOR242-1	olfactory receptor 734	Class II
A_51_P432117	Olfr1508	0.2271	57270	10090	MOR244-2	olfactory receptor 1508	Class II
A_52_P632359	Olfr1316	0.1174	258737	10090	MOR245-1|MOR245-26	olfactory receptor 1316	Class II
A_51_P362554	Olfr1307	0.2008	257956	10090	MOR245-19P	olfactory receptor 1307	Class II
A_52_P629709	Olfr1314	0.2249	258442	10090	MOR245-2	olfactory receptor 1314	Class II
A_51_P265792	Olfr1312	0.1833	258359	10090	MOR245-20	olfactory receptor 1312	Class II
A_51_P192824	Olfr1311	0.0884	258271	10090	MOR245-21	olfactory receptor 1311	Class II
A_51_P468150	Olfr1308	0.1434	258258	10090	MOR245-22	olfactory receptor 1308	Class II
A_51_P504658	Olfr1036	0.2848	258245	10090	MOR245-25	olfactory receptor 1036	Class II
A_51_P348154	Olfr1317	0.1429	258440	10090	MOR245-4	olfactory receptor 1317	Class II
A_52_P374754	Olfr1305	0.4445	258396	10090	MOR245-8	olfactory receptor 1305	Class II
A_52_P592135	Olfr1288	0.082	258395	10090	MOR245-9	olfactory receptor 1288	Class II
A_52_P452608	Olfr730	0.0613	258486	10090	MOR247-1	olfactory receptor 730	Class II
A_51_P520297	Olfr724	0.03	258485	10090	MOR247-2	olfactory receptor 724	Class II
A_52_P106560	Olfr1295	0.1026	258398	10090	MOR248-10	olfactory receptor 1295	Class II
A_52_P571109	Olfr1285	0.3525	545447	10090	MOR248-17P	olfactory receptor 1285	Class II
A_51_P207781	Olfr1297	0.0219	258890	10090	MOR248-4	olfactory receptor 1297	Class II
A_51_P303296	Olfr1301	0.093	258889	10090	MOR248-5	olfactory receptor 1301	Class II
A_51_P245263	Olfr1298	0.2212	258888	10090	MOR248-6	olfactory receptor 1298	Class II
A_51_P325789	Olfr1294	0.1	258887	10090	MOR248-7	olfactory receptor 1294	Class II
A_51_P310020	Olfr1299	0.0438	258886	10090	MOR248-8	olfactory receptor 1299	Class II
A_51_P413895	Olfr1290	0.034	257662	10090	MOR248-9	olfactory receptor 1290	Class II
A_51_P345011	Olfr111	0.3272	545205	10090	MOR249-1P	olfactory receptor 111	Class II
A_52_P621707	Olfr101	0.1541	258831	10090	MOR250-2	olfactory receptor 101	Class II
A_51_P341306	Olfr102	0.2586	258218	10090	MOR250-4	olfactory receptor 102	Class II
A_51_P183111	Olfr531	0.3463	258955	10090	MOR251-3	olfactory receptor 531	Class II
A_52_P463154	Olfr309	0.016	258196	10090	MOR251-4P	olfactory receptor 309	Class II
A_52_P557059	Olfr536	0.1227	258513	10090	MOR252-1|MOR252-4	olfactory receptor 536	Class II
A_51_P297369	Olfr530	0.107	258512	10090	MOR252-2	olfactory receptor 530	Class II
A_52_P157355	Olfr533	0.0507	258056	10090	MOR252-3P	olfactory receptor 533	Class II
A_51_P411335	Olfr61	0.106	18362	10090	MOR253-1	olfactory receptor 61	Class II
A_51_P229957	Olfr541	0.0502	258964	10090	MOR253-3	olfactory receptor 541	Class II
A_51_P497756	Olfr539	0.0186	258963	10090	MOR253-4	olfactory receptor 539	Class II
A_51_P117115	Olfr53	0.0211	258962	10090	MOR253-5	olfactory receptor 53	Class II
A_51_P422934	Olfr535	0.1198	258956	10090	MOR253-7	olfactory receptor 535	Class II
A_51_P233338	Olfr46	0.1063	18345	10090	MOR253-8	olfactory receptor 46	Class II
A_51_P357299	Olfr211	0.3859	258914	10090	MOR253-9	olfactory receptor 211	Class II
A_51_P485531 A_51_P485537	Olfr291	0.0688 0.0388	258410	10090	MOR254-2	olfactory receptor 291	Class II
A_51_P342436	Olfr1364	0.0699	258533	10090	MOR256-13	olfactory receptor 1364	Class II
A_51_P460562	Olfr1368	0.1206	258527	10090	MOR256-15	olfactory receptor 1368	Class II
A_51_P246428	Olfr15	0.1	18312	10090	MOR256-17	olfactory receptor 15	Class II
A_52_P393515	Olfr137	0.421	258481	10090	MOR256-18	olfactory receptor 137	Class II
A_52_P20688	Olfr130	0.1356	258480	10090	MOR256-19	olfactory receptor 130	Class II
A_52_P594944	Olfr91	0.2542	258470	10090	MOR256-20	olfactory receptor 91	Class II
A_52_P347942	Olfr1384	0.1708	258464	10090	MOR256-23	olfactory receptor 1384	Class II
A_51_P333896	Olfr1393	0.0276	258463	10090	MOR256-24	olfactory receptor 1393	Class II
A_52_P219853	Olfr1381	0.3649	258461	10090	MOR256-26	olfactory receptor 1381	Class II
A_52_P224513	Olfr1391	0.2736	258460	10090	MOR256-27	olfactory receptor 1391	Class II
A_51_P116889	Olfr92	0.301	258448	10090	MOR256-29	olfactory receptor 92	Class II
A_51_P140964 A_51_P140966	Olfr1359	0.122	258067	10090	MOR256-35|MOR256-60	olfactory receptor 1359	Class II
A_51_P438781	Olfr93	0.1912	258051	10090	MOR256-39P	olfactory receptor 93	Class II
A_51_P160710	Olfr131	0.1967	258867	10090	MOR256-4	olfactory receptor 131	Class II
A_51_P484735	Olfr138	0.0119	170648	10090	MOR256-40P	olfactory receptor 138	Class II
A_51_P185071	Olfr135	0.1049	258329	10090	MOR256-48	olfactory receptor 135	Class II
A_51_P318028	Olfr134	0.3444	258829	10090	MOR256-5	olfactory receptor 134	Class II
A_52_P91019	Olfr1386	0.1851	257888	10090	MOR256-50	olfactory receptor 1386	Class II
A_51_P471134 A_52_P155500	Olfr1372-ps1	0.1821	257871	10090	MOR256-54P	olfactory receptor 1372, pseudogene 1	Class II
A_51_P223307	Olfr1383	0.2234	404337	10090	MOR256-56	olfactory receptor 1383	Class II
A_51_P225309	Olfr1371	0.0579	276865	10090	MOR256-58	olfactory receptor 1371	Class II
A_52_P181679	Olfr136	0.0131	258803	10090	MOR256-7	olfactory receptor 136	Class II
A_51_P150242	Olfr1362	0.3396	258739	10090	MOR256-8	olfactory receptor 1362	Class II
A_52_P468639	Olfr450	0.1568	258437	10090	MOR257-3	olfactory receptor 450	Class II
A_51_P403610	Olfr1339	0.1566	258851	10090	MOR258-2	olfactory receptor 1339	Class II
A_52_P516962	Olfr1519	0.4218	258394	10090	MOR259-1	olfactory receptor 1519	Class II
A_51_P143309	Olfr1337	0.2268	258306	10090	MOR259-10	olfactory receptor 1337	Class II
A_51_P313729	Olfr1330	0.222	258331	10090	MOR259-8	olfactory receptor 1330	Class II
A_51_P420457	Olfr1338	0.3324	258259	10090	MOR259-9	olfactory receptor 1338	Class II
A_51_P500692	Olfr715	0.3763	258776	10090	MOR260-1	olfactory receptor 715	Class II
A_51_P420519	Olfr1018	0.0126	258579	10090	MOR260-5	olfactory receptor 1018	Class II
A_51_P108555	Olfr437	0.2842	258293	10090	MOR261-11	olfactory receptor 437	Class II
A_51_P376384	Olfr448	0.4707	258270	10090	MOR261-13	olfactory receptor 448	Class II
A_51_P160241	Olfr47	0.4039	18346	10090	MOR261-9	olfactory receptor 47	Class II
A_51_P441643	Olfr267	0.3253	258922	10090	MOR262-1	olfactory receptor 267	Class II
A_51_P305600	Olfr155	0.0251	29845	10090	MOR262-14	olfactory receptor 155	Class II
A_52_P524953	Olfr156	0.0551	29846	10090	MOR262-6	olfactory receptor 156	Class II
A_51_P199249	Olfr272	0.2965	258836	10090	MOR262-7	olfactory receptor 272	Class II
A_51_P120875	Olfr713	0.0079	259036	10090	MOR263-1	olfactory receptor 713	Class II
A_51_P511669	Olfr122	0.0549	258285	10090	MOR263-10	olfactory receptor 122	Class II
A_51_P487964	Olfr714	0.1354	259035	10090	MOR263-2	olfactory receptor 714	Class II
A_51_P360658	Olfr120	0.0214	258624	10090	MOR263-3	olfactory receptor 120	Class II
A_52_P377492	Olfr1122	0.394	259033	10090	MOR264-1	olfactory receptor 1122	Class II
A_51_P259201	Olfr1123	0.0384	258347	10090	MOR264-17	olfactory receptor 1123	Class II
A_51_P345596	Olfr1116	0.2226	257875	10090	MOR264-21P	olfactory receptor 1116	Class II
A_51_P143016	Olfr1129	0.1094	258111	10090	MOR264-23|MOR264-9P	olfactory receptor 1129	Class II
A_51_P410991	Olfr1125	0.0411	259030	10090	MOR264-3	olfactory receptor 1125	Class II
A_51_P143040	Olfr1126	0.2216	258834	10090	MOR264-5	olfactory receptor 1126	Class II
A_52_P114585	Olfr1112	0.0183	258655	10090	MOR264-6	olfactory receptor 1112	Class II
A_51_P516119	Olfr1148	0.26	258220	10090	MOR264-7	olfactory receptor 1148	Class II
A_51_P108309	Olfr1494	0.0268	258992	10090	MOR266-1	olfactory receptor 1494	Class II
A_52_P227190	Olfr1420	0.3123	258405	10090	MOR266-4	olfactory receptor 1420	Class II
A_51_P233846	Olfr1491	0.3519	258342	10090	MOR266-8	olfactory receptor 1491	Class II
A_51_P299475	Olfr63	0.4099	258939	10090	MOR267-1	olfactory receptor 63	Class II
A_51_P313246	Olfr509	0.1706	258369	10090	MOR267-14	olfactory receptor 509	Class II
A_51_P197137	Olfr370	0.2995	258267	10090	MOR267-16	olfactory receptor 370	Class II
A_51_P484279	Olfr55	0.2261	100038859	10090	MOR267-20	olfactory receptor 55	Class II
A_51_P154295	Olfr419	0.4366	258710	10090	MOR267-6	olfactory receptor 419	Class II
A_51_P360092	Olfr1403	0.4594	258645	10090	MOR267-8	olfactory receptor 1403	Class II
A_51_P491856	Olfr1358	0.2303	258224	10090	MOR267-9	olfactory receptor 1358	Class II
A_51_P136589	Olfr796	0.2822	258933	10090	MOR269-1	olfactory receptor 796	Class II
A_52_P26086	Olfr171	0.3005	258960	10090	MOR273-1|MOR273-5	olfactory receptor 171	Class II
A_52_P237973	Olfr170	0.0358	258959	10090	MOR273-2	olfactory receptor 170	Class II
A_51_P127247	Olfr330	0.0181	258879	10090	MOR275-1	olfactory receptor 330	Class II
A_52_P538390	Olfr165	0.0798	258458	10090	MOR279-1	olfactory receptor 165	Class II
A_51_P308697	Olfr164	0.2239	258443	10090	MOR279-2	olfactory receptor 164	Class II
A_51_P285462	Olfr1394	0.4626	258273	10090	MOR280-1	olfactory receptor 1394	Class II
A_51_P375088	Olfr701	0.0328	66786	10090	MOR283-1	olfactory receptor 701	Class II
A_51_P232649	Olfr706	0.4258	258350	10090	MOR283-11	olfactory receptor 706	Class II
A_51_P231125 A_51_P231128	Olfr704	0.2108	257902	10090	MOR283-12P	olfactory receptor 704	Class II
A_51_P247976	Olfr705	0.256	259034	10090	MOR283-2	olfactory receptor 705	Class II
A_51_P312452	Olfr698	0.3811	258595	10090	MOR283-3	olfactory receptor 698	Class II
A_51_P445422	Olfr695	0.0151	258591	10090	MOR283-6	olfactory receptor 695	Class II
A_51_P281273	Olfr703	0.2415	258589	10090	MOR283-7	olfactory receptor 703	Class II
A_51_P358122	Olfr332	0.2301	257932	10090	MOR284-2	olfactory receptor 332	Class II
A_52_P192369	Olfr283	11.6178	259038	10090	MOR160-1	olfactory receptor 283	Class II
A_51_P117835	Olfr933	2.2697	258433	10090	MOR171-22	olfactory receptor 933	Class II
A_52_P95831	Olfr1165	2.6228	258642	10090	MOR174-7	olfactory receptor 1165	Class II
A_51_P347945	Olfr1451	2.2429	258700	10090	MOR202-1	olfactory receptor 1451	Class II
A_51_P262131	Olfr1443	2.2055	258693	10090	MOR202-8	olfactory receptor 1443	Class II
A_51_P196213	Olfr978	6.2203	259109	10090	MOR223-3	olfactory receptor 978	Class II
A_51_P225573	Olfr981	2.7644	258283	10090	MOR223-8	olfactory receptor 981	Class II
A_52_P479334	Olfr1370	3.6485	258528	10090	MOR256-14	olfactory receptor 1370	Class II
A_51_P518412	Olfr763	4.3864	258861	10090	MOR269-2	olfactory receptor 763	Class II
1 The olfactory receptor genes are divided into two families: classⅠand class Ⅱ

## Sheet: Table S3
Supplemental Table S3 Differentially expressed genes specifically expressed in the immature olfactory neurons between the AC3-/- and AC3+/+ mice identified in the microarray hybridization.
Symbol	Gene name	Gene ID	Fold change
Olig1	oligodendrocyte transcription factor 1	50914	0.0023
9430085L16Rik	RIKEN cDNA 9430085L16 gene	77375	0.0083
Myt1	myelin transcription factor 1	17932	0.0122
Olig2	oligodendrocyte transcription factor 2	50913	0.0136
Ell3	elongation factor RNA polymerase II-like 3	269344	0.0166
Ina	internexin neuronal intermediate filament protein, alpha	226180	0.0222
Gap43	growth associated protein 43	14432	0.0295
Insm1	insulinoma-associated 1	53626	0.0301
Elavl2	ELAV (embryonic lethal, abnormal vision, Drosophila)-like 2 (Hu antigen B)	15569	0.0358
Nhlh1	nescient helix loop helix 1	18071	0.0403
Fezf1	Fez family zinc finger 1	73191	0.0409
Stmn2	stathmin-like 2	20257	0.0581
Frmd3	FERM domain containing 3	242506	0.0597
Mapt	microtubule-associated protein tau	17762	0.0607
Tubb3	tubby candidate gene	22152	0.0712
Bex4	brain expressed gene 4	406217	0.075
Hist3h2ba	histone cluster 3, H2ba	78303	0.0902
Dpysl5	dihydropyrimidinase-like 5	65254	0.0917
Rnf165	ring finger protein 165	225743	0.0995
Trim66	tripartite motif-containing 66	330627	0.0996
Ces7	carboxylesterase 7	67935	0.1018
LOC100047943	similar to Ina protein	100047943	0.1065
Tsg101	tumor susceptibility gene 101	22088	0.1329
Bex1	brain expressed gene 1	19716	0.137
D930020B18Rik	RIKEN cDNA D930020B18 gene	216393	0.1491
Stk32a	serine/threonine kinase 32A	269019	0.1602
Nhlh2	nescient helix loop helix 2	18072	0.1793
Lrrc16b	leucine rich repeat containing 16B	268747	0.1804
Pnpla3	patatin-like phospholipase domain containing 3	116939	0.1806
Mtap6	microtubule-associated protein 6	17760	0.1872
Dennd2a	DENN/MADD domain containing 2A	209773	0.1982
Gng8	guanine nucleotide binding protein (G protein), gamma 8	14709	0.2087
9330159F19Rik	RIKEN cDNA 9330159F19 gene	212448	0.2095
Trpm3	transient receptor potential cation channel, subfamily M, member 3	226025	0.2112
Gchfr	GTP cyclohydrolase I feedback regulator	320415	0.2173
Hs3st5	heparan sulfate (glucosamine) 3-O-sulfotransferase 5	319415	0.2261
Rab3c	RAB3C, member RAS oncogene family	67295	0.2317
Cacng4	calcium channel, voltage-dependent, gamma subunit 4	54377	0.2383
6330409D20Rik	RIKEN cDNA 6330409D20 gene	70730	0.2394
Zcchc18	zinc finger, CCHC domain containing 18	66995	0.2401
D7Ertd715e	DNA segment, Chr 7, ERATO Doi 715, expressed	52480	0.241
D430019H16Rik	RIKEN cDNA D430019H16 gene	268595	0.2535
BC005764	cDNA sequence BC005764	216152	0.2554
1500001A10Rik	RIKEN cDNA 1500001A10 gene	68955	0.267
Pcf11	cleavage and polyadenylation factor subunit homolog	74737	0.2774
Cecr2	cat eye syndrome chromosome region, candidate 2 homolog (human)	330409	0.2881
4930515G01Rik	RIKEN cDNA 4930515G01 gene	67642	0.2896
Macrod2	MACRO domain containing 2	72899	0.304
Rbm11	RNA binding motif protein 11	224344	0.3078
Garnl4	GTPase activating RANGAP domain-like 4	380711	0.308
Rab33a	RAB33A, member of RAS oncogene family	19337	0.3081
Mapre2	microtubule-associated protein, RP/EB family, member 2	212307	0.3107
Kif5c	kinesin family member 5C	16574	0.3225
Ccnjl	cyclin J-like	380694	0.3304
Cbx2	chromobox homolog 2 (Drosophila Pc class)	12416	0.3476
Cpeb1	cytoplasmic polyadenylation element binding protein 1	12877	0.3479
Mrpl41	mitochondrial ribosomal protein L41	107733	0.3485
Emx2	empty spiracles homolog 2 (Drosophila)	13797	0.3518
Nfasc	neurofascin	269116	0.3523
Epb4.1l1	erythrocyte protein band 4.1-like 1	13821	0.358
Cbln1	cerebellin 1 precursor protein	12404	0.359
Phactr1	phosphatase and actin regulator 1	218194	0.3659
Necab2	N-terminal EF-hand calcium binding protein 2	117148	0.3746
Phactr1	phosphatase and actin regulator 1	218194	0.3764
Magi3	membrane associated guanylate kinase, WW and PDZ domain containing 3	99470	0.3765
Dtna	dystrobrevin alpha	13527	0.3806
Ypel1	yippee-like 1 (Drosophila)	106369	0.3836
Actl6b	actin-like 6B	83766	0.3994
Rpl30	ribosomal protein L30	19946	0.4196
9630023C09Rik	RIKEN cDNA 9630023C09 gene	320378	0.4364
Chn1	chimerin (chimaerin) 1	108699	0.4373
Nrcam	neuron-glia-CAM-related cell adhesion molecule	319504	0.4459
Akap1	A kinase (PRKA) anchor protein 1	75547	0.4464
EG319225	predicted gene, EG319225	319225	0.4547
Sfrs3	splicing factor, arginine/serine-rich 3 (SRp20)	20383	0.4676
Tnik	TRAF2 and NCK interacting kinase	665113	0.4678
Klf7	Kruppel-like factor 7 (ubiquitous)	93691	0.4821
Rpa3	replication protein A3	68240	0.4888
A130006I12Rik	RIKEN cDNA A130006I12 gene	319264	0.4905
Hist1h1e	histone cluster 1, H1e	50709	0.4918
Zik1	zinc finger protein interacting with K protein 1	22775	0.4933
Cpne5	copine V	240058	0.494
D0H4S114	DNA segment, human D4S114	27528	0.4977
Smarce1	SWI/SNF related, matrix associated, actin dependent regulator of chromatin, subfamily e, member 1	57376	2.0639
Pycr1	pyrroline-5-carboxylate reductase 1	209027	2.078
Snhg11	small nucleolar RNA host gene 11 (non-protein coding)	319317	2.0907
9930104L06Rik	RIKEN cDNA 9930104L06 gene	194268	2.1015
Frmd4a	FERM domain containing 4A	209630	2.1106
Hyls1	hydrolethalus syndrome 1	76832	2.2323
Ell2	elongation factor RNA polymerase II	192657	2.2339
Dcc	deleted in colorectal carcinoma	13176	2.2896
Ddx58	DEAD (Asp-Glu-Ala-Asp) box polypeptide 58	230073	2.3217
Snn	stannin	20621	2.3858
E130309D02Rik	RIKEN cDNA E130309D02 gene	231868	2.3894
Srl	sarcalumenin	106393	2.3937
Ms4a14	membrane-spanning 4-domains, subfamily A, member 14	383435	2.3981
Gprc5a	G protein-coupled receptor, family C, group 5, member A	232431	2.4743
Vim	vimentin	22352	2.5681

## Sheet: Table S4
Supplemental Table S4 Differentially expressed genes specifically expressed in the mature olfactory neurons between the AC3-/- and AC3+/+ mice identified in the microarray hybridization.
Symbol	Gene name	Gene ID	Fold change
S100a5	S100 calcium binding protein A5	20199	0.0001
Umodl1	uromodulin-like 1	52020	0.001
A330043J11Rik	RIKEN cDNA A330043J11 gene	320261	0.0011
Kcnc4	potassium voltage gated channel, Shaw-related subfamily, member 4	99738	0.0026
Nrn1l	neuritin 1-like	234700	0.0028
Gnal	guanine nucleotide binding protein, alpha stimulating, olfactory type	14680	0.0031
Fgf12	fibroblast growth factor 12	14167	0.0034
Diras1	DIRAS family, GTP-binding RAS-like 1	208666	0.0034
Pcolce2	procollagen C-endopeptidase enhancer 2	76477	0.0039
omp	olfactory marker protein	18378	0.0041
Ctxn3	cortexin 3	629147	0.0042
Slc17a6	solute carrier family 17 (sodium-dependent inorganic phosphate cotransporter), member 6	140919	0.0042
Clstn2	calsyntenin 2	64085	0.0053
Kcna5	potassium voltage-gated channel, shaker-related subfamily, member 5	16493	0.0055
B830017H08Rik	RIKEN cDNA B830017H08 gene	433004	0.0057
Cntn4	contactin 4	269784	0.0058
Stmn4	stathmin-like 4	56471	0.0062
Gng13	guanine nucleotide binding protein (G protein), gamma 13	64337	0.0069
Efna3	ephrin A3	13638	0.0071
Slc24a2	solute carrier family 24 (sodium/potassium/calcium exchanger), member 2	76376	0.0101
Dner	delta/notch-like EGF-related receptor	227325	0.0102
Scn9a	sodium channel, voltage-gated, type IX, alpha	20274	0.011
1700026J04Rik	RIKEN cDNA 1700026J04 gene	71864	0.0114
Cartpt	CART prepropeptide	27220	0.0116
Gadl1	glutamate decarboxylase-like 1	73748	0.0116
Ppp2r2c	protein phosphatase 2 (formerly 2A), regulatory subunit B (PR 52), gamma isoform	269643	0.0117
Stoml3	stomatin (Epb7.2)-like 3	229277	0.012
Eef1a2	eukaryotic translation elongation factor 1 alpha 2	13628	0.012
Acsl6	acyl-CoA synthetase long-chain family member 6	216739	0.0122
Atp8b3	ATPase, class I, type 8B, member 3	67331	0.0122
Lrrc3b	leucine rich repeat containing 3B	218763	0.013
Drd2	dopamine receptor 2	13489	0.0131
Snap25	synaptosomal-associated protein 25	20614	0.0167
Acbd7	acyl-Coenzyme A binding domain containing 7	78245	0.017
Scgn	secretagogin, EF-hand calcium binding protein	214189	0.0171
Paqr9	progestin and adipoQ receptor family member IX	75552	0.0189
Jph3	junctophilin 3	57340	0.0193
Clgn	calmegin	12745	0.0204
Dlgap3	discs, large (Drosophila) homolog-associated protein 3	242667	0.0206
Tmem130	transmembrane protein 130	243339	0.0209
Scg3	secretogranin III	20255	0.023
Pygo1	pygopus 1	72135	0.0248
4930488B01Rik	RIKEN cDNA 4930488B01 gene	75036	0.0268
Jakmip1	janus kinase and microtubule interacting protein 1	76071	0.0274
2900019G14Rik	RIKEN cDNA 2900019G14 gene	72932	0.0277
Chgb	chromogranin B	12653	0.0287
Pex5l	peroxisomal biogenesis factor 5-like	58869	0.0291
Syt4	synaptotagmin IV	20983	0.0309
Kcnn2	potassium intermediate/small conductance calcium-activated channel, subfamily N, member 2	140492	0.0313
Olfr672	olfactory receptor 672	258755	0.0326
Olfr701	olfactory receptor 701	66786	0.0328
Snph	syntaphilin	241727	0.033
1700012B09Rik	RIKEN cDNA 1700012B09 gene	69325	0.0344
Kcnk10	potassium channel, subfamily K, member 10	72258	0.035
Nxnl2	nucleoredoxin-like 2	75124	0.0374
Efr3b	EFR3 homolog B (S. cerevisiae)	668212	0.0382
Nsg1	neuron specific gene family member 1	18196	0.0396
Syt1	synaptotagmin I	20979	0.0412
Rgs7	regulator of G protein signaling 7	24012	0.0419
Faim2	Fas apoptotic inhibitory molecule 2	72393	0.044
Kcns3	potassium voltage-gated channel, delayed-rectifier, subfamily S, member 3	238076	0.0455
Epha5	Eph receptor A5	13839	0.0457
Epb4.9	erythrocyte protein band 4.9	13829	0.0486
Ppp1r1a	protein phosphatase 1, regulatory (inhibitor) subunit 1A	58200	0.0529
Olfr749	olfactory receptor 749	56858	0.0574
Necab1	N-terminal EF-hand calcium binding protein 1	69352	0.0575
Kcna6	potassium voltage-gated channel, shaker-related, subfamily, member 6	16494	0.06
Sv2c	synaptic vesicle glycoprotein 2c	75209	0.0618
Pnmal1	PNMA-like 1	71691	0.0622
Olfr73	olfactory receptor 73	117004	0.0638
Stxbp5l	syntaxin binding protein 5-like	207227	0.064
Pde4a	phosphodiesterase 4A, cAMP specific	18577	0.0648
Zfp385b	zinc finger protein 385B	241494	0.0654
Chst8	carbohydrate (N-acetylgalactosamine 4-0) sulfotransferase 8	68947	0.0683
Lrp11	low density lipoprotein receptor-related protein 11	237253	0.07
4922501L14Rik	RIKEN cDNA 4922501L14 gene	71845	0.0721
Anks1b	ankyrin repeat and sterile alpha motif domain containing 1B	77531	0.073
Nol6	bruno-like 6, RNA binding protein (Drosophila)	76183	0.077
Gpr162	G protein-coupled receptor 162	14788	0.0771
Actr3b	ARP3 actin-related protein 3 homolog B (yeast)	242894	0.0777
2810405K02Rik	RIKEN cDNA 2810405K02 gene	66469	0.0805
Dlg2	discs, large homolog 2 (Drosophila)	23859	0.0813
Unc13c	unc-13 homolog C (C. elegans)	208898	0.0816
Syngr1	synaptogyrin 1	20972	0.0827
Scn8a	sodium channel, voltage-gated, type VIII, alpha	20273	0.083
Sv2b	synaptic vesicle glycoprotein 2 b	64176	0.0851
Kcnb1	potassium voltage gated channel, Shab-related subfamily, member 1	16500	0.0871
Nap1l5	nucleosome assembly protein 1-like 5	58243	0.0872
Nptx2	neuronal pentraxin 2	53324	0.0883
Ebf4	early B-cell factor 4	228598	0.0905
Olfm1	olfactomedin 1	56177	0.0919
4930570G19Rik	RIKEN cDNA 4930570G19 gene	329782	0.0931
AI836003	expressed sequence AI836003	239650	0.0947
Dcdc2a	doublecortin domain containing 2a	195208	0.0949
Plekhb1	pleckstrin homology domain containing, family B (evectins) member 1	27276	0.0983
Ddo	D-aspartate oxidase	70503	0.1034
Hcn2	hyperpolarization-activated, cyclic nucleotide-gated K+ 2	15166	0.1043
Enox1		239188	0.1117
Lrrn1	leucine rich repeat protein 1, neuronal	16979	0.1118
6530401D17Rik	RIKEN cDNA 6530401D17 gene	76219	0.1125
Neu2	neuraminidase 2	23956	0.1126
Stom	stomatin	13830	0.1131
Ttll6	tubulin tyrosine ligase-like family, member 6	237930	0.114
Kcna2	potassium voltage-gated channel, shaker-related subfamily, member 2	16490	0.1142
3632451O06Rik	RIKEN cDNA 3632451O06 gene	67419	0.1153
Lbxcor1	ladybird homeobox 1 homolog (Drosophila) corepressor 1	207667	0.1161
Plxna3	plexin A3	18846	0.1162
Tarsl2	threonyl-tRNA synthetase-like 2	272396	0.1168
En2	engrailed 2	13799	0.1175
Fmn2	formin 2	54418	0.1186
Trim45	tripartite motif-containing 45	229644	0.1203
Hcn1	hyperpolarization-activated, cyclic nucleotide-gated K+ 1	15165	0.1204
Sema4g	sema domain, immunoglobulin domain (Ig), transmembrane domain (TM) and short cytoplasmic domain (se)	26456	0.1214
Brdt	bromodomain, testis-specific	114642	0.1215
Adcy3	adenylate cyclase 3	104111	0.1226
Impdh1	inosine 5'-phosphate dehydrogenase 1	23917	0.1249
Lhfpl4	lipoma HMGIC fusion partner-like protein 4	269788	0.125
9430081G06Rik	RIKEN cDNA 9430081G06 gene	77425	0.1266
Gramd1c	GRAM domain containing 1C	207798	0.1274
RP23-157O10.7	P140 gene	56013	0.1276
Scrn1	secernin 1	69938	0.1297
Reep1	receptor accessory protein 1	52250	0.131
Ckb	creatine kinase, brain	12709	0.1329
Kirrel3	kin of IRRE like 3 (Drosophila)	67703	0.134
Slc6a17	solute carrier family 6 (neurotransmitter transporter), member 17	229706	0.1378
Kcnn1	potassium intermediate/small conductance calcium-activated channel, subfamily N, member 1	84036	0.1388
Pcdh9	protocadherin 9	211712	0.1394
Nat14	N-acetyltransferase 14	269854	0.1399
Tspan7	tetraspanin 7	21912	0.1454
Pth2	parathyroid hormone 2	114640	0.1455
Mmp16	matrix metallopeptidase 16	17389	0.15
4930538K18Rik	RIKEN cDNA 4930538K18 gene	75180	0.1521
Spock2	sparc/osteonectin, cwcv and kazal-like domains proteoglycan 2	94214	0.1541
Olfr690	olfactory receptor 690	56860	0.1543
D130043K22Rik	RIKEN cDNA D130043K22 gene	210108	0.1549
Hdac9	histone deacetylase 9	79221	0.1616
Negr1	neuronal growth regulator 1	320840	0.1639
Adam23	a disintegrin and metallopeptidase domain 23	23792	0.1661
Pcdh10	protocadherin 10	18526	0.1668
Dnm1	dynamin 1	13429	0.1678
Cntnap4	contactin associated protein-like 4	170571	0.1691
Rtn4rl1	reticulon 4 receptor-like 1	237847	0.1695
Camk2d	calcium/calmodulin-dependent protein kinase II, delta	108058	0.1713
Camk2a	calcium/calmodulin-dependent protein kinase II alpha	12322	0.1713
Abca5	ATP-binding cassette, sub-family A (ABC1), member 5	217265	0.1783
Tmem117	transmembrane protein 117	320709	0.1793
Olfr1264	olfactory receptor 1264	258206	0.1794
Cabp4	calcium binding protein 4	73660	0.1798
Cpn1	carboxypeptidase N, polypeptide 1	93721	0.1801
Pak3	p21 (CDKN1A)-activated kinase 3	18481	0.181
Crym	crystallin, mu	12971	0.1864
A830039N20Rik	RIKEN cDNA A830039N20 gene	268723	0.1884
Ralyl	RALY RNA binding protein-like	76897	0.1895
Plxna4	plexin A4	243743	0.1952
Myo6	myosin VI	17920	0.1953
A830018L16Rik	RIKEN cDNA A830018L16 gene	320492	0.1954
Pde6d	phosphodiesterase 6D, cGMP-specific, rod, delta	18582	0.1967
Ak1	adenylate kinase 1	11636	0.1968
Adipor1	adiponectin receptor 1	72674	0.1976
Ptprr	protein tyrosine phosphatase, receptor type, R	19279	0.1983
6330526H18Rik	RIKEN cDNA 6330526H18 gene	76174	0.1984
Wdr54	WD repeat domain 54	75659	0.1997
Rfx4	regulatory factor X, 4 (influences HLA class II expression)	71137	0.2016
Crocc	ciliary rootlet coiled-coil, rootletin	230872	0.2017
A230083H22Rik	RIKEN cDNA A230083H22 gene	353211	0.2023
Kcnip4	Kv channel interacting protein 4	80334	0.2038
Elovl4	elongation of very long chain fatty acids (FEN1/Elo2, SUR4/Elo3, yeast)-like 4	83603	0.2044
Kcnh3	potassium voltage-gated channel, subfamily H (eag-related), member 3	16512	0.2049
Nmnat2	nicotinamide nucleotide adenylyltransferase 2	226518	0.2059
Xkr6	X Kell blood group precursor related family member 6 homolog	219149	0.2066
Hrasls	HRAS-like suppressor	27281	0.2115
Atp10d	ATPase, class V, type 10D	231287	0.2119
Slc8a1	solute carrier family 8 (sodium/calcium exchanger), member 1	20541	0.213
Glb1l2	galactosidase, beta 1-like 2	244757	0.2155
Calm1	calmodulin 1	12313	0.2177
1600021P15Rik	RIKEN cDNA 1600021P15 gene	239796	0.2204
Epb4.1l3	erythrocyte protein band 4.1-like 3	13823	0.2217
Brunol4	bruno-like 4, RNA binding protein (Drosophila)	108013	0.2218
Pkib	protein kinase inhibitor beta, cAMP dependent, testis specific	18768	0.222
Pcp4l1	Purkinje cell protein 4-like 1	66425	0.2221
Tom1	target of myb1 homolog (chicken)	21968	0.2247
Lrp8	low density lipoprotein receptor-related protein 8, apolipoprotein e receptor	16975	0.2251
Olfr1508	olfactory receptor 1508	57270	0.2271
Limch1	LIM and calponin homology domains 1	77569	0.2281
Pcdhb1	protocadherin beta 1	93872	0.2306
Klhl5	kelch-like 5 (Drosophila)	71778	0.2309
6330416G13Rik	RIKEN cDNA 6330416G13 gene	230279	0.2357
Camk2n2	calcium/calmodulin-dependent protein kinase II inhibitor 2	73047	0.2361
Ptp4a3	protein tyrosine phosphatase 4a3	19245	0.2401
Dtx1	deltex 1 homolog (Drosophila)	14357	0.2419
Akap3	A kinase (PRKA) anchor protein 3	11642	0.2449
Hmox1	heme oxygenase (decycling) 1	15368	0.2471
Nqo1	NAD(P)H dehydrogenase, quinone 1	18104	0.2472
Igsf8	immunoglobulin superfamily, member 8	140559	0.2474
Cacnb3	calcium channel, voltage-dependent, beta 3 subunit	12297	0.2516
Kif1a	kinesin family member 1A	16560	0.2557
2810488G03Rik	RIKEN cDNA 2810488G03 gene	72842	0.2578
Scn3b	sodium channel, voltage-gated, type III, beta	235281	0.2622
Hfe	hemochromatosis	15216	0.2661
Tmc7	transmembrane channel-like gene family 7	209760	0.2661
Avp	arginine vasopressin	11998	0.2678
Eomes	eomesodermin homolog (Xenopus laevis)	13813	0.2682
Fut10	fucosyltransferase 10	171167	0.2695
Cdh15	cadherin 15	12555	0.2698
Tmem151a	transmembrane protein 151A	381199	0.2714
Rap1gds1	RAP1, GTP-GDP dissociation stimulator 1	229877	0.2723
Kcnab2	potassium voltage-gated channel, shaker-related subfamily, beta member 2	16498	0.2738
Olfr65	olfactory receptor 65	18365	0.274
Syn2	synapsin II	20965	0.2773
Tctex1d1	Tctex1 domain containing 1	67344	0.2794
Fads6	fatty acid desaturase domain family, member 6	328035	0.2799
Cbx8	chromobox homolog 8 (Drosophila Pc class)	30951	0.2846
Olfr870	olfactory receptor 870	57251	0.2855
Tmod2	tropomodulin 2	50876	0.2871
Spef2	sperm flagellar 2	320277	0.2912
Ttc8	tetratricopeptide repeat domain 8	76260	0.2959
Ppp1r14c	protein phosphatase 1, regulatory (inhibitor) subunit 14c	76142	0.2966
Stbd1	starch binding domain 1	52331	0.3034
Magi2	membrane associated guanylate kinase, WW and PDZ domain containing 2	50791	0.3044
1700086L19Rik	RIKEN cDNA 1700086L19 gene	74284	0.3068
Gpr135	G protein-coupled receptor 135	238252	0.3112
Pde1c	phosphodiesterase 1C	18575	0.3113
Vstm2a	V-set and transmembrane domain containing 2A	211739	0.3118
Pde7b	phosphodiesterase 7B	29863	0.312
Tspyl4	TSPY-like 4	72480	0.3123
BC062109	cDNA sequence BC062109	231503	0.316
A430108G06Rik	RIKEN cDNA A430108G06 gene	319650	0.3221
Rab11fip4	RAB11 family interacting protein 4 (class II)	268451	0.3243
Kcnma1	potassium large conductance calcium-activated channel, subfamily M, alpha member 1	16531	0.3285
Psen2	presenilin 2	19165	0.3289
Bzrap1	benzodiazapine receptor associated protein 1	207777	0.3315
Macrod1	MACRO domain containing 1	107227	0.3322
Eml2	echinoderm microtubule associated protein like 2	72205	0.3405
Slc24a4	solute carrier family 24 (sodium/potassium/calcium exchanger), member 4	238384	0.3472
4932425I24Rik	RIKEN cDNA 4932425I24 gene	320214	0.348
6330415G19Rik	RIKEN cDNA 6330415G19 gene	320020	0.354
Rgs6	regulator of G-protein signaling 6	50779	0.3583
1700012L04Rik	RIKEN cDNA 1700012L04 gene	76383	0.3587
Bbs7	Bardet-Biedl syndrome 7 (human)	71492	0.3592
Fn3k	fructosamine 3 kinase	63828	0.3621
Ormdl3	ORM1-like 3 (S. cerevisiae)	66612	0.3646
Arhgef3	Rho guanine nucleotide exchange factor (GEF) 3	71704	0.3726
1110018F16Rik	RIKEN cDNA 1110018F16 gene	68594	0.3738
Abhd3	abhydrolase domain containing 3	106861	0.3785
Ccdc64b	coiled-coil domain containing 64B	212733	0.3794
Hpcal4	hippocalcin-like 4	170638	0.3797
Hdac11	histone deacetylase 11	232232	0.3824
Rps6kc1	ribosomal protein S6 kinase polypeptide 1	320119	0.3826
Pappa	pregnancy-associated plasma protein A	18491	0.3831
Zfand2a	zinc finger, AN1-type domain 2A	100494	0.3851
1700041C02Rik	RIKEN cDNA 1700041C02 gene	73332	0.3862
Wdsub1	WD repeat, SAM and U-box domain containing 1	72137	0.3886
Endod1	endonuclease domain containing 1	71946	0.3902
Arsg	arylsulfatase G	74008	0.3952
Scn2a1	sodium channel, voltage-gated, type II, alpha 1	110876	0.3983
Vsnl1	visinin-like 1	26950	0.3985
Klhl29	kelch-like 29 (Drosophila)	208439	0.3987
Slc4a4	solute carrier family 4 (anion exchanger), member 4	54403	0.399
Ppp2r2b	protein phosphatase 2 (formerly 2A), regulatory subunit B (PR 52), beta isoform	72930	0.4034
Pacsin3	protein kinase C and casein kinase substrate in neurons 1	80708	0.404
2810407C02Rik	RIKEN cDNA 2810407C02 gene	69227	0.4062
B230363K08Rik	coiled-coil domain containing 108	241116	0.4065
Manea	mannosidase, endo-alpha	242362	0.4081
Pigg	phosphatidylinositol glycan anchor biosynthesis, class G	433931	0.4117
Ndrg3	N-myc downstream regulated gene 3	29812	0.4156
Agtpbp1	ATP/GTP binding protein 1	67269	0.4198
Epha7	Eph receptor A7	13841	0.4198
Bat5	HLA-B associated transcript 5	193742	0.4212
Slc25a33	solute carrier family 25, member 33	70556	0.4248
Entpd2	ectonucleoside triphosphate diphosphohydrolase 2	12496	0.4264
Serpine2	serine (or cysteine) peptidase inhibitor, clade E, member 2	20720	0.4306
Ttll3	tubulin tyrosine ligase-like family, member 3	101100	0.4329
Ipo13	importin 13	230673	0.4336
Ppargc1a	peroxisome proliferative activated receptor, gamma, coactivator 1 alpha	19017	0.4342
5730433N10Rik	RIKEN cDNA 5730433N10 gene	70545	0.4345
Tollip	toll interacting protein	54473	0.435
Cacnb2	calcium channel, voltage-dependent, beta 2 subunit	12296	0.4375
Rab40b	Rab40b, member RAS oncogene family	217371	0.4381
Tnfrsf21	tumor necrosis factor receptor superfamily, member 21	94185	0.4382
A830010M20Rik	RIKEN cDNA A830010M20 gene	231570	0.4394
9030409G11Rik	RIKEN cDNA 9030409G11 gene	71529	0.4419
Il28ra	interleukin 28 receptor alpha	242700	0.4419
Ubl3	ubiquitin-like 3	24109	0.4472
Gabbr1	gamma-aminobutyric acid (GABA) B receptor, 1	54393	0.4572
5033430I15Rik	RIKEN cDNA 5033430I15 gene	76000	0.4574
Lrrc6	leucine rich repeat containing 67	69312	0.4578
Clec16a	C-type lectin domain family 16, member A	74374	0.4609
Ccdc39	coiled-coil domain containing 39	51938	0.4627
Myo5a	myosin VA	17918	0.4632
Synj2	synaptojanin 2	20975	0.4652
Efhc2	EF-hand domain (C-terminal) containing 2	74405	0.474
Napa	N-ethylmaleimide sensitive fusion protein	108124	0.476
Stox1	storkhead box 1	216021	0.4788
Nap1l2	nucleosome assembly protein 1-like 2	17954	0.4799
Gpt2	glutamic pyruvate transaminase (alanine aminotransferase) 2	108682	0.4836
Ppm1l	protein phosphatase 1 (formerly 2C)-like	242083	0.4909
Dusp14	dual specificity phosphatase 14	56405	0.495
Cnksr3	Cnksr family member 3	215748	0.4992
Sypl2	synaptophysin	17306	2.0445
Spsb1	splA/ryanodine receptor domain and SOCS box containing 1	74646	2.1868
Spag16	sperm associated antigen 16	66722	2.259
Agr3	anterior gradient homolog 3 (Xenopus laevis)	403205	2.4738
Abcc12	ATP-binding cassette, sub-family C (CFTR/MRP), member 12	244562	2.9439
Got1	glutamic-oxaloacetic transaminase 1-like 1	76615	3.4071

## Sheet: Table S5
Supplemental Table S5 Effect of AC3 knockout on the differentially expressed genes associated with epigenetic regulation function
Epigenetic mode	Count	genes
methylation	118	Nestin Nell1 Nap1l5 Nanog Myo1a Mx1 Mrpl41 Mrgprf MPP3 Mms19Mmp12 Mll2 Mgmt METTL10 Mest Meg3 Mefv MAPT Maob MAEL LZTS1 LY6K Ltbr Lgr6 Lck LaxLama1 Kynu kallikrein 1 Klf1 Klotho KAT2A Kank Itga4 ITGA2 ITGA1 Inpp5f IGFBP-3 IGFBP2 IDO1 Id4 Icam4 HTR2A HRK Hrasls Hpcal4 Hoxa3 HNF1A Herc3 Hepacam HAND2 H1foo GPM6A Glce Gjb2 Gfi1b Gdf10 GATA5 GATA-1 Gadd45b Gad1 Gabra5 FXN Foxp3 FLT1 Flnc FBXL16 FasL …
histone modification	26	Myst4 Hdac11 GFAP ELL2 DOT1L Brdt6 Hdac11 GATA-1 Myst3 Ltbr KAT2A Ifng HSF1 HRK Hey2 Grip1 FasL DPF3 DOK4 Cbx8 Prl HDAC ELK4 Col10a1 CLCA2 Ckb
RNA silencing	4	Mms19 Jakmip1 Casp12 Arhgef10
genomic imprinting	5	Nap1l5 INSR Hoxa3 Bex1 Snrpn
