# Supplementary material for: Gene Expression Profiles of Main Olfactory Epithelium in Adenylyl Cyclase 3 Knockout Mice
Source: Int J Mol Sci. 2015 Nov 30;16(12):28320–33. doi: 10.3390/ijms161226107 (PMC4691054; doi:10.3390/ijms161226107)
Supplement: Supplementary file 1 [file ijms-16-26107-s001.zip › ijms-97743-the complete array data-WT_MOE_1_VS_Mut_MOE_2.txt]

The complete array data-WT_MOE_1_VS_Mut_MOE_2

ProbeName	WT_MOE_1_NS	WT_MOE_1_flags	Mut_MOE_2_NS	Mut_MOE_2_flags	foldchange	EntrezGeneID	GeneSymbol	Description	GeneName	UniGeneID	Chromosome.End.Index_Avadis_	Chromosome.Number_Avadis_	Chromosome.Start.Index_Avadis_	Chromosome.Strand_Avadis_	Cytoband	GenbankAccession	GenomicCoordinates	Go	RefSeqAccession

A_51_P100021	6.0556865	P	6.5016274	P	0.734105390027204	    16656	Hivep3	Mus musculus clone pZAS3 328-2275 zinc finger protein ZAS3 (Krc) mRNA	 partial cds; alternatively spliced. [AY454345]	human immunodeficiency virus type I enhancer binding protein 3	Mm.302758	119808005	chr4	119807944	+	mm|4qD2.1	AY454345	chr4:119807944-119808005	GO:0005622|GO:0006355|GO:0005737|GO:0008270|GO:0005634|GO:0045893|GO:0003676|GO:0003677|GO:0046872|GO:0006351
A_51_P100034	12.852271	P	13.395707	P	0.686134825996025	    69674	Mif4gd	Mus musculus MIF4G domain containing (Mif4gd)	 transcript variant 1	 mRNA [NM_027162]	MIF4G domain containing	Mm.390387	115469328	chr11	115469269	-	mm|11qE2	NM_027162	chr11:115469328-115469269	GO:0008150|GO:0005737|GO:0016070|GO:0005488|GO:0005634|GO:0005575|GO:0008022|GO:0006417	NM_027162
A_51_P100052	3.9768724	P	4.4621964	P	0.71433662635944	   245450	Slitrk2	Mus musculus SLIT and NTRK-like family	 member 2 (Slitrk2)	 transcript variant 2	 mRNA [NM_198863]	SLIT and NTRK-like family	 member 2	Mm.336081	 63908204	chrX	 63908145	+	mm|XqA7.1	NM_198863	chrX:63908145-63908204	GO:0003674|GO:0016020|GO:0016021|GO:0007409	NM_198863
A_51_P100063	10.243995	P	10.435699	P	0.875570953529977	    16924	Lnx1	Mus musculus ligand of numb-protein X 1 (Lnx1)	 transcript variant 2	 mRNA [NM_010727]	ligand of numb-protein X 1	Mm.440403	 74993810	chr5	 74993386	-	mm|5qC3.3	NM_010727	chr5:74993810-74993386	GO:0005515|GO:0006511|GO:0005737|GO:0004842|GO:0042787|GO:0016874|GO:0051260|GO:0008270|GO:0030165|GO:0046872	NM_010727
A_51_P100084	6.266599	P	6.4195485	P	0.899409794476588	NA					NA		NA
A_51_P100099	10.2147455	P	9.838736	P	1.29774731244501	    69886	2610002J23Rik	Mus musculus 10 days embryo whole body cDNA	 RIKEN full-length enriched library	 clone:2610002J23 product:unclassifiable	 full insert sequence. [AK011292]	RIKEN cDNA 2610002J23 gene	Mm.391799	100318948	chr11	100318889	-	mm|11qD	AK011292	chr11:100318948-100318889	GO:0008150|GO:0003674|GO:0005575
A_51_P100155	11.272888	P	11.188908	P	1.05993808943347	    70285	Rpf1	Mus musculus ribosome production factor 1 homolog (S. cerevisiae) (Rpf1)	 transcript variant 2	 mRNA [NM_027371]	ribosome production factor 1 homolog (S. cerevisiae)	Mm.28128	146170053	chr3	146169498	-	mm|3qH2	NM_027371	chr3:146170053-146169498	GO:0008150|GO:0042254|GO:0006364|GO:0003723|GO:0005730|GO:0005634|GO:0019843|GO:0005524|GO:0004812	NM_027371
A_51_P100174	13.753587	P	13.639533	P	1.08226515289572	    17427	Mns1	Mus musculus meiosis-specific nuclear structural protein 1 (Mns1)	 mRNA [NM_008613]	meiosis-specific nuclear structural protein 1	Mm.387671	 72306333	chr9	 72306274	+	mm|9qD	NM_008613	chr9:72306274-72306333	GO:0005882|GO:0008150|GO:0003674|GO:0007126|GO:0005634|GO:0005635	NM_008613
A_51_P100181	8.599077	P	8.47047	P	1.09323761151357	    26896	Med14	Mus musculus mediator complex subunit 14 (Med14)	 transcript variant 1	 mRNA [NM_001048208]	mediator complex subunit 14	Mm.17616	 12253601	chrX	 12253542	-	mm|XqA1.1	NM_001048208	chrX:12253601-12253542	GO:0003712|GO:0006355|GO:0001104|GO:0006367|GO:0006357|GO:0003713|GO:0005634|GO:0006351|GO:0046966|GO:0030518|GO:0045944|GO:0016592|GO:0004872|GO:0045893|GO:0030521	NM_001048208
A_51_P100218	1.9127263	A	1.8992982	A	1.00935110053021	   171232	Vmn1r234	Mus musculus vomeronasal 1 receptor 234 (Vmn1r234)	 mRNA [NM_134198]	vomeronasal 1 receptor 234	Mm.377189	 21366694	chr17	 21366635	+	mm|17qA3.2	NM_134198	chr17:21366635-21366694	GO:0005550|GO:0016503|GO:0007186|GO:0005887|GO:0004872|GO:0019236	NM_134198
A_51_P100227	9.865846	P	9.861347	P	1.00312333664869	    70572	Ipo5	Mus musculus importin 5 (Ipo5)	 mRNA [NM_023579]	importin 5	Mm.221452	121346947	chr14	121346888	+	mm|14qE5	NM_023579	chr14:121346888-121346947	GO:0005515|GO:0005737|GO:0006610|GO:0005488|GO:0008565|GO:0006810|GO:0005634|GO:0015031|GO:0006886	NM_023579
A_51_P100238	3.0897784	A	3.3520854	A	0.833753605360543	   258373	Olfr323	Mus musculus olfactory receptor 323 (Olfr323)	 mRNA [NM_146376]	olfactory receptor 323	Mm.377463	 58438789	chr11	 58438730	-	mm|11qB1.3	NM_146376	chr11:58438789-58438730	GO:0007608|GO:0007165|GO:0004984|GO:0007186|GO:0004930|GO:0004872|GO:0016021|GO:0004871	NM_146376
A_51_P100246	10.511386	P	10.39448	P	1.08440675111389	    22192	Ube2m	Mus musculus ubiquitin-conjugating enzyme E2M (UBC12 homolog	 yeast) (Ube2m)	 transcript variant 1	 mRNA [NM_145578]	ubiquitin-conjugating enzyme E2M (UBC12 homolog	 yeast)	Mm.196580	 13621239	chr7	 13621093	-	mm|7qA1	NM_145578	chr7:13621239-13621093	GO:0004842|GO:0043525|GO:0016567|GO:0016881|GO:0000166|GO:0045116|GO:0019788|GO:0016874|GO:0008152|GO:0018169|GO:0005524|GO:0006464	NM_145578
A_51_P100289	11.582652	P	11.65957	P	0.94808085068188	    20807	Srf	Mus musculus serum response factor (Srf)	 mRNA [NM_020493]	serum response factor	Mm.45044	 46683795	chr17	 46683788	-	mm|17qC	NM_020493	chr17:46683795-46683788	GO:0005515|GO:0000790|GO:0003700|GO:0007369|GO:0008285|GO:0006366|GO:0005783|GO:0045597|GO:0010736|GO:0002042|GO:0051491|GO:0010735|GO:0005634|GO:0060261|GO:0030155|GO:0046716|GO:0042803|GO:0001947|GO:0007507|GO:0005737|GO:0048589|GO:0045987|GO:0045944|GO:0007015|GO:0009725|GO:0046016|GO:0034097|GO:0030336|GO:0001569|GO:0006355|GO:0001707|GO:0007616|GO:0090009|GO:0007275|GO:0001829|GO:0003677|GO:0001701|GO:0006351|GO:0043565|GO:0001076|GO:0045893|GO:0090398|GO:0008134	NM_020493
A_51_P100298	7.9120207	P	8.282766	P	0.773382861961503	    20908	Stx3	Mus musculus syntaxin 3 (Stx3)	 transcript variant A	 mRNA [NM_152220]	syntaxin 3	Mm.272264	 11859903	chr19	 11857591	-	mm|19qA	NM_152220	chr19:11859903-11857591	GO:0005515|GO:0043005|GO:0050544|GO:0005886|GO:0042581|GO:0042582|GO:0031201|GO:0006887|GO:0006886|GO:0031175|GO:0030426|GO:0005484|GO:0016324|GO:0006944|GO:0016020|GO:0005911|GO:0006810|GO:0006836|GO:0001950|GO:0034599|GO:0016021|GO:0016192	NM_152220
A_51_P100309	2.331559	A	2.3350341	A	0.997594142957102	    18390	Oprm1	Mus musculus opioid receptor	 mu 1 (Oprm1)	 mRNA [NM_001039652]	opioid receptor	 mu 1	Mm.457998	  3516213	chr10	  3516154	-	mm|10qA1	NM_001039652	chr10:3516213-3516154	GO:0005886|GO:0032100|GO:0032839|GO:0007193|GO:0004988|GO:0004985|GO:0030425|GO:0007191|GO:0007610|GO:0043204|GO:0004872|GO:0007626|GO:0004871|GO:0004930|GO:0060079|GO:0005624|GO:0042383|GO:0007165|GO:0032590|GO:0007186|GO:0016020|GO:0044424|GO:0045121|GO:0016021|GO:0005925|GO:0031635|GO:0051930	NM_001039652
A_51_P100327	10.154297	P	11.304604	P	0.450529350177516	    21354	Tap1	Mus musculus transporter 1	 ATP-binding cassette	 sub-family B (MDR/TAP) (Tap1)	 transcript variant 1	 mRNA [NM_013683]	transporter 1	 ATP-binding cassette	 sub-family B (MDR/TAP)	Mm.482076	 34330913	chr17	 34330854	+	mm|17qB1	NM_013683	chr17:34330854-34330913	GO:0005215|GO:0042825|GO:0042288|GO:0006200|GO:0005886|GO:0005783|GO:0042626|GO:0030176|GO:0015031|GO:0042803|GO:0005739|GO:0046967|GO:0015833|GO:0000166|GO:0019885|GO:0042605|GO:0006810|GO:0015197|GO:0016887|GO:0015421|GO:0042270|GO:0005792|GO:0017111|GO:0019060|GO:0046982|GO:0035672|GO:0046980|GO:0006952|GO:0055085|GO:0005524|GO:0043531|GO:0016020|GO:0001916|GO:0016021|GO:0046978|GO:0046979	NM_013683
A_51_P100347	4.0505695	P	4.0125966	A	1.02667026026841	   240476	Zfp407	Mus musculus zinc finger protein 407 (Zfp407)	 mRNA [NM_001033341]	zinc finger protein 407	Mm.329575	 84731042	chr18	 84730983	-	mm|18qE4	NM_001033341	chr18:84731042-84730983	GO:0008150|GO:0003674|GO:0005575	NM_001033341
A_51_P100379	4.7496166	P	4.82962	P	0.946055417153776	   210853	Zfp947	Mus musculus zinc finger protein 947 (Zfp947)	 mRNA [NM_177596]	zinc finger protein 947	Mm.441622	 22281966	chr17	 22281907	-	mm|17qA3.3	NM_177596	chr17:22281966-22281907	GO:0008150|GO:0003674|GO:0005575|GO:0046872	NM_177596
A_51_P100428	2.1600347	A	2.1442854	A	1.01097638619961	NA		Mus musculus adult male testis cDNA	 RIKEN full-length enriched library	 clone:4930408C10 product:myosin heavy chain	 cardiac muscle	 adult	 full insert sequence. [AK076663]		Mm.444665	 55610339	chr14	 55610280	+	mm|14qC3	AK076663	chr14:55610280-55610339
A_51_P100470	4.5974793	P	4.3870044	P	1.15706900010193	    52013	D19Ertd386e	Mus musculus DNA segment	 Chr 19	 ERATO Doi 386	 expressed (D19Ertd386e)	 mRNA [NM_177464]	DNA segment	 Chr 19	 ERATO Doi 386	 expressed	Mm.254169	 42665980	chr19	 42665921	+	mm|19qC3	NM_177464	chr19:42665921-42665980	GO:0008150|GO:0003674|GO:0000166|GO:0005575	NM_177464
A_51_P100505	9.431236	P	9.558559	P	0.915528688921081	NA		Mus musculus 2 days pregnant adult female ovary cDNA	 RIKEN full-length enriched library	 clone:E330024G11 product:unclassifiable	 full insert sequence. [AK054424]		Mm.276024	 16988614	chr12	 16988555	+	mm|12qA1.1	AK054424	chr12:16988555-16988614
A_51_P100519	2.3675594	A	2.4343781	A	0.954740986594209	NA		RIKEN cDNA 4930542C16 gene [Source:MGI Symbol;Acc:MGI:1922413] [ENSMUST00000062438]		Mm.396159	 25435102	chr14	 25435043	-	mm|14qA3	XM_003085003	chr14:25435102-25435043		XM_003085003
A_51_P100527	1.979186	A	1.9615768	A	1.01228056170780	    56552	Vmn2r26	Mus musculus vomeronasal 2	 receptor 26 (Vmn2r26)	 mRNA [NM_019917]	vomeronasal 2	 receptor 26	Mm.23795	124011217	chr6	124003998	+	mm|6qF2	NM_019917	chr6:124003998-124011217	GO:0007165|GO:0016020|GO:0007186|GO:0005886|GO:0004930|GO:0004872|GO:0016021|GO:0004871|GO:0019236	NM_019917
A_51_P100537	2.8241575	A	2.6902788	A	1.09723967915684	   232717	Prss58	Mus musculus protease	 serine 58 (Prss58)	 mRNA [NM_175020]	protease	 serine 58	Mm.56997	 40845394	chr6	 40845335	-	mm|6qB1	NM_175020	chr6:40845394-40845335	GO:0008150|GO:0003674|GO:0016787|GO:0004252|GO:0006508|GO:0008236|GO:0008233|GO:0005576|GO:0005575|GO:0003824	NM_175020
A_51_P100565	10.539999	P	10.915275	P	0.770957907700117	    26406	Map3k3	mitogen-activated protein kinase kinase kinase 3 [Source:MGI Symbol;Acc:MGI:1346874] [ENSMUST00000168703]	mitogen-activated protein kinase kinase kinase 3	Mm.27041	106016739	chr11	106016546	+	mm|11qE1	U43187	chr11:106016546-106016739	GO:0005515|GO:0005524|GO:0046872|GO:0007243|GO:0005829|GO:0016310|GO:0046777|GO:0004672|GO:0000166|GO:0004674|GO:0016301|GO:0006468|GO:0004709|GO:0016740|GO:0016772
A_51_P100573	8.546827	P	8.996722	P	0.732096128322466	    26406	Map3k3	Mus musculus mitogen-activated protein kinase kinase kinase 3 (Map3k3)	 mRNA [NM_011947]	mitogen-activated protein kinase kinase kinase 3	Mm.27041	106015926	chr11	106015867	+	mm|11qE1	NM_011947	chr11:106015867-106015926	GO:0005515|GO:0005524|GO:0046872|GO:0007243|GO:0005829|GO:0016310|GO:0046777|GO:0004672|GO:0000166|GO:0004674|GO:0016301|GO:0006468|GO:0004709|GO:0016740|GO:0016772	NM_011947
A_51_P100624	2.3481197	A	2.4104755	A	0.957698999676172	    75586	Krtap9-3	Mus musculus keratin associated protein 9-3 (Krtap9-3)	 mRNA [NM_029351]	keratin associated protein 9-3	Mm.75707	 99458872	chr11	 99458813	-	mm|11qD	NM_029351	chr11:99458872-99458813	GO:0005882|GO:0008150|GO:0003674|GO:0005575|GO:0045095	NM_029351
A_51_P100625	2.8497515	A	4.6051006	P	0.296201509908526	    28194	Apon	Mus musculus apolipoprotein N (Apon)	 mRNA [NM_133996]	apolipoprotein N	Mm.439846	127692571	chr10	127692512	+	mm|10qD3	NM_133996	chr10:127692512-127692571	GO:0008150|GO:0003674|GO:0005737|GO:0005615	NM_133996
A_51_P100768	5.2526684	P	5.4372106	P	0.879928252904246	NA		RIKEN cDNA 4833413E03 gene [Source:MGI Symbol;Acc:MGI:1925354] [ENSMUST00000013706]			 31695858	chr17	 31695799	+	mm|17qB1	AK019514	chr17:31695799-31695858
A_51_P100776	6.751581	P	6.8473244	P	0.935789924092387	    67911	Zfp169	Mus musculus zinc finger protein 169 (Zfp169)	 transcript variant 1	 mRNA [NM_026450]	zinc finger protein 169	Mm.251375	 48585061	chr13	 48585002	-	mm|13qA5	NM_026450	chr13:48585061-48585002	GO:0008150|GO:0003674|GO:0005575|GO:0046872	NM_026450
A_51_P100787	12.474907	P	12.332451	P	1.10378256311175	    66354	Snw1	Mus musculus SNW domain containing 1 (Snw1)	 mRNA [NM_025507]	SNW domain containing 1	Mm.271174	 88791047	chr12	 88790988	-	mm|12qD2	NM_025507	chr12:88791047-88790988	GO:0005515|GO:0006397|GO:0008380|GO:0003713|GO:0005112|GO:0005634|GO:0071013|GO:0000398|GO:0042809|GO:0044428|GO:0045944|GO:0005681|GO:0045892	NM_025507
A_51_P100828	12.423458	P	12.231713	P	1.14214435210132	    11757	Prdx3	Mus musculus peroxiredoxin 3 (Prdx3)	 nuclear gene encoding mitochondrial protein	 mRNA [NM_007452]	peroxiredoxin 3	Mm.29821	 60940207	chr19	 60940148	-	mm|19qD3	NM_007452	chr19:60940207-60940148	GO:0042542|GO:0008284|GO:0042802|GO:0005739|GO:0005737|GO:0043524|GO:0004601|GO:0051092|GO:0032496|GO:0030099|GO:0051920|GO:0019900|GO:0042744|GO:0043154|GO:0006979|GO:0043027|GO:0033673|GO:0043066|GO:0016209|GO:0019901|GO:0051881|GO:0001893|GO:0008022|GO:0016491|GO:0034614|GO:0007005|GO:0005769|GO:0055114	NM_007452
A_51_P100852	7.3596654	P	9.369724	P	0.248263039600857	   215900	Fam26f	Mus musculus family with sequence similarity 26	 member F (Fam26f)	 mRNA [NM_175449]	family with sequence similarity 26	 member F	Mm.34479	 33846270	chr10	 33846211	-	mm|10qB1	NM_175449	chr10:33846270-33846211	GO:0008150|GO:0003674|GO:0016020|GO:0016021|GO:0005575	NM_175449
A_51_P100856	8.458202	P	8.995442	P	0.68908793350636	    14268	Fn1	Mus musculus fibronectin 1 (Fn1)	 mRNA [NM_010233]	fibronectin 1	Mm.193099	 71639659	chr1	 71637422	-	mm|1qC3	NM_010233	chr1:71639659-71637422	GO:0005515|GO:0005793|GO:0005578|GO:0005577|GO:0005576|GO:0006916|GO:0002020|GO:0005615|GO:0045340|GO:0005604|GO:0031012|GO:0016504|GO:0010952|GO:0016324|GO:0018149|GO:0007160|GO:0030198|GO:0042060|GO:0034446|GO:0007044|GO:0007155	NM_010233
A_51_P100866	15.7267	P	15.461607	P	1.20171351271307	    11957	Atp5j	Mus musculus ATP synthase	 H+ transporting	 mitochondrial F0 complex	 subunit F (Atp5j)	 nuclear gene encoding mitochondrial protein	 mRNA [NM_016755]	ATP synthase	 H+ transporting	 mitochondrial F0 complex	 subunit F	Mm.353	 84828235	chr16	 84828176	-	mm|16qC3.3	NM_016755	chr16:84828235-84828176	GO:0046034|GO:0015986|GO:0006200|GO:0015078|GO:0005743|GO:0005753|GO:0005739|GO:0003674|GO:0016020|GO:0006810|GO:0000276|GO:0045263|GO:0006811|GO:0015992	NM_016755
A_51_P100991	5.4846225	P	6.197254	P	0.61020609696358	    14917	Gucy2c	Mus musculus guanylate cyclase 2c (Gucy2c)	 transcript variant 2	 mRNA [NM_145067]	guanylate cyclase 2c	Mm.222729	136648027	chr6	136646532	-	mm|6qG1	NM_145067	chr6:136648027-136646532	GO:0016849|GO:0009636|GO:0004383|GO:0005525|GO:0005524|GO:0016829|GO:0035556|GO:0004672|GO:0000166|GO:0016020|GO:0042127|GO:0006182|GO:0015643|GO:0004872|GO:0006468|GO:0016021|GO:0009190|GO:0016772	NM_145067
A_51_P100997	6.121371	P	6.5673785	P	0.734071501860193	   381286	Serpinb3c	Mus musculus serine (or cysteine) peptidase inhibitor	 clade B	 member 3C (Serpinb3c)	 mRNA [NM_201363]	serine (or cysteine) peptidase inhibitor	 clade B	 member 3C	Mm.337362	109167973	chr1	109167914	-	mm|1qE2.1	NM_201363	chr1:109167973-109167914	GO:0030162|GO:0010951|GO:0005515|GO:0004867|GO:0005576	NM_201363
A_51_P101004	2.8664715	A	2.7287307	A	1.10018092897817	   381286	Serpinb3c	Mus musculus serine (or cysteine) peptidase inhibitor	 clade B	 member 3C (Serpinb3c)	 mRNA [NM_201363]	serine (or cysteine) peptidase inhibitor	 clade B	 member 3C	Mm.337362	109169283	chr1	109168602	-	mm|1qE2.1	NM_201363	chr1:109169283-109168602	GO:0030162|GO:0010951|GO:0005515|GO:0004867|GO:0005576	NM_201363
A_51_P101006	13.115333	P	12.835522	P	1.21403582943497	    68870	Ak8	Mus musculus adenylate kinase 8 (Ak8)	 mRNA [NM_001033874]	adenylate kinase 8	Mm.273318	 28668578	chr2	 28668519	+	mm|2qA3	NM_001033874	chr2:28668519-28668578	GO:0016310|GO:0008150|GO:0006139|GO:0005737|GO:0000166|GO:0016301|GO:0004127|GO:0005575|GO:0004017|GO:0005524|GO:0016740|GO:0019205	NM_001033874
A_51_P101022	7.4463444	P	3.0819552	A	20.5973838229851	   258819	Olfr640	Mus musculus olfactory receptor 640 (Olfr640)	 mRNA [NM_146822]	olfactory receptor 640	Mm.377708	111170317	chr7	111170258	-	mm|7qE3	NM_146822	chr7:111170317-111170258	GO:0007608|GO:0007165|GO:0004984|GO:0007186|GO:0004930|GO:0004872|GO:0016021|GO:0004871	NM_146822
A_51_P101034	4.2125587	P	5.603663	P	0.381272848101439	NA		Mus musculus adult male corpora quadrigemina cDNA	 RIKEN full-length enriched library	 clone:B230386H24 product:unclassifiable	 full insert sequence. [AK046453]			 98100778	chr11	 98100719	+	mm|11qD	AK046453	chr11:98100719-98100778
A_51_P101065	4.320581	P	5.994091	P	0.313489711340319	    15566	Htr7	Mus musculus 5-hydroxytryptamine (serotonin) receptor 7 (Htr7)	 mRNA [NM_008315]	5-hydroxytryptamine (serotonin) receptor 7	Mm.254266	 36034823	chr19	 36034764	-	mm|19qC2	NM_008315	chr19:36034823-36034764	GO:0007165|GO:0004993|GO:0007186|GO:0005886|GO:0004930|GO:0030594|GO:0007268|GO:0004872|GO:0016021|GO:0004871|GO:0007210|GO:0007192	NM_008315
A_51_P101075	15.171787	P	14.485809	P	1.60879220884154	    69171	1810031K17Rik	Mus musculus RIKEN cDNA 1810031K17 gene (1810031K17Rik)	 mRNA [NM_026977]	RIKEN cDNA 1810031K17 gene	Mm.28193	 75132448	chr1	 75132389	-	mm|1qC3	NM_026977	chr1:75132448-75132389	GO:0008150|GO:0003674|GO:0019901|GO:0016020|GO:0016021|GO:0005575|GO:0000079	NM_026977
A_51_P101086	8.596811	P	9.046603	P	0.73214839757613	    69256	Zfp397	Mus musculus zinc finger protein 397 (Zfp397)	 mRNA [NM_027007]	zinc finger protein 397	Mm.218343	 24121237	chr18	 24121178	+	mm|18qA2	NM_027007	chr18:24121178-24121237	GO:0008150|GO:0003674|GO:0006355|GO:0005634|GO:0005575|GO:0046872|GO:0006351	NM_027007
A_51_P101137	11.135254	P	10.318675	P	1.76122472153028	   217125	Samd14	Mus musculus sterile alpha motif domain containing 14 (Samd14)	 transcript variant 1	 mRNA [NM_146025]	sterile alpha motif domain containing 14	Mm.297199	 94887250	chr11	 94887191	+	mm|11qD	NM_146025	chr11:94887191-94887250	GO:0008150|GO:0003674|GO:0005575	NM_146025
A_51_P101146	7.5966334	P	8.038131	P	0.736369817761723	    18788	Serpinb2	Mus musculus serine (or cysteine) peptidase inhibitor	 clade B	 member 2 (Serpinb2)	 transcript variant 1	 mRNA [NM_011111]	serine (or cysteine) peptidase inhibitor	 clade B	 member 2	Mm.271870	109421555	chr1	109421496	+	mm|1qE2.1	NM_011111	chr1:109421496-109421555	GO:0030162|GO:0010951|GO:0005737|GO:0005794|GO:0004867|GO:0010466|GO:0042060|GO:0005576|GO:0030414	NM_011111
A_51_P101170	4.7373013	P	5.2135906	P	0.718824107983638	NA		Mus musculus 2 days neonate thymus thymic cells cDNA	 RIKEN full-length enriched library	 clone:C920012N01 product:unclassifiable	 full insert sequence. [AK050605]		Mm.297688	 65482593	chr5	 65482534	-	mm|5qC3.1	AK050605	chr5:65482593-65482534
A_51_P101196	14.967344	P	15.607276	P	0.641743195997723	    19186	Psme1	Mus musculus proteasome (prosome	 macropain) 28 subunit	 alpha (Psme1)	 mRNA [NM_011189]	proteasome (prosome	 macropain) 28 subunit	 alpha	Mm.830	 56200253	chr14	 56200194	+	mm|14qC3	NM_011189	chr14:56200194-56200253	GO:0005515|GO:0000502|GO:0061133|GO:0008537|GO:0019884|GO:0010950|GO:0051437|GO:0051436|GO:0031145	NM_011189
A_51_P101228	7.874012	P	7.949115	P	0.949274345887024	   229004	Gmeb2	Mus musculus glucocorticoid modulatory element binding protein 2 (Gmeb2)	 mRNA [NM_198169]	glucocorticoid modulatory element binding protein 2	Mm.220423	180986650	chr2	180986591	-	mm|2qH4	NM_198169	chr2:180986650-180986591	GO:0008150|GO:0003674|GO:0006355|GO:0005737|GO:0005488|GO:0005634|GO:0003677|GO:0046872|GO:0006351	NM_198169
A_51_P101255	12.163216	P	12.163216	P	1	    71743	Coasy	Mus musculus Coenzyme A synthase (Coasy)	 nuclear gene encoding mitochondrial protein	 mRNA [NM_027896]	Coenzyme A synthase	Mm.182271	100947670	chr11	100947611	+	mm|11qD	NM_027896	chr11:100947611-100947670	GO:0004595|GO:0009058|GO:0016779|GO:0015937|GO:0005575|GO:0003824|GO:0005524|GO:0016310|GO:0000166|GO:0004140|GO:0016301|GO:0008152|GO:0016740	NM_027896
A_51_P101283	5.16914	P	5.559344	P	0.763021704037845	NA					NA		NA
A_51_P101317	7.4349327	P	7.7052803	P	0.829119755324439	    71974	Prmt3	Mus musculus protein arginine N-methyltransferase 3 (Prmt3)	 mRNA [NM_133740]	protein arginine N-methyltransferase 3	Mm.33202	 57113318	chr7	 57113259	+	mm|7qB5	NM_133740	chr7:57113259-57113318	GO:0005515|GO:0019919|GO:0008168|GO:0016274|GO:0032259|GO:0046872|GO:0035242|GO:0005829|GO:0005622|GO:0005737|GO:0006479|GO:0005840|GO:0008270|GO:0008276|GO:0016740	NM_133740
A_51_P101347	12.428929	P	12.157059	P	1.20737179135873	   102502	Pls1	Mus musculus plastin 1 (I-isoform) (Pls1)	 mRNA [NM_001033210]	plastin 1 (I-isoform)	Mm.11869	 95653317	chr9	 95653258	-	mm|9qE3.3	NM_001033210	chr9:95653317-95653258	GO:0008150|GO:0003674|GO:0005737|GO:0005509|GO:0003779	NM_001033210
A_51_P101375	5.853989	P	5.870613	P	0.988543255375326	    20440	St6gal1	Mus musculus beta galactoside alpha 2	6 sialyltransferase 1 (St6gal1)	 mRNA [NM_145933]	beta galactoside alpha 2	6 sialyltransferase 1	Mm.149029	 23358465	chr16	 23358405	+	mm|16qB1	NM_145933	chr16:23358405-23358465	GO:0008373|GO:0005794|GO:0016020|GO:0016757|GO:0008152|GO:0006486|GO:0016021|GO:0016740|GO:0003835	NM_145933
A_51_P101388	6.9597178	P	7.323181	P	0.77729643253439	    20562	Slit1	Mus musculus slit homolog 1 (Drosophila) (Slit1)	 mRNA [NM_015748]	slit homolog 1 (Drosophila)	Mm.40322	 41677879	chr19	 41677820	-	mm|19qC3	NM_015748	chr19:41677879-41677820	GO:0031290|GO:0005509|GO:0050919|GO:0005102|GO:0048843|GO:0043395|GO:0005576|GO:0007275|GO:0007409|GO:0048846|GO:0048495|GO:0005615|GO:0033563|GO:0030154|GO:0007399|GO:0022028|GO:0022029|GO:0005737|GO:0008045|GO:0040023|GO:0021772|GO:0007411|GO:0048812	NM_015748
A_51_P101425	6.672431	P	6.8435535	P	0.888151379236626	   234729	Vac14	Mus musculus 10 days embryo whole body cDNA	 RIKEN full-length enriched library	 clone:2610014M01 product:unclassifiable	 full insert sequence. [AK011396]	Vac14 homolog (S. cerevisiae)		113243712	chr8	113243653	+	mm|8qE1	AK011396	chr8:113243653-113243712	GO:0008219|GO:0005792|GO:0005774|GO:0019209|GO:0016020|GO:0005783|GO:0005488|GO:0006970|GO:0043085|GO:0010008|GO:0042327|GO:0005768
A_51_P101460	12.952841	P	13.300549	P	0.785831552074752	   109620	Dsp	Mus musculus desmoplakin (Dsp)	 mRNA [NM_023842]	desmoplakin	Mm.355327	 38290180	chr13	 38290121	+	mm|13qA3.3	NM_023842	chr13:38290121-38290180	GO:0030057|GO:0030054|GO:0005886|GO:0005624|GO:0001533|GO:0005739|GO:0005916|GO:0016323|GO:0005737|GO:0016337|GO:0018149|GO:0030216|GO:0005198|GO:0043588|GO:0030674|GO:0005856|GO:0034332	NM_023842
A_51_P101474	7.8381476	P	7.4966197	P	1.267097815705	    50765	Trfr2	Mus musculus transferrin receptor 2 (Trfr2)	 mRNA [NM_015799]	transferrin receptor 2	Mm.21757	138028651	chr5	138028592	+	mm|5qG2	NM_015799	chr5:138028592-138028651	GO:0006879|GO:0007165|GO:0005737|GO:0016020|GO:0005886|GO:0004998|GO:0006508|GO:0008233|GO:0004872|GO:0016021	NM_015799
A_51_P101506	6.114976	P	6.460908	P	0.786799529495134	    53417	Hif3a	Mus musculus hypoxia inducible factor 3	 alpha subunit (Hif3a)	 transcript variant 2	 mRNA [NM_016868]	hypoxia inducible factor 3	 alpha subunit	Mm.135110	 17621234	chr7	 17621175	-	mm|7qA2	NM_016868	chr7:17621234-17621175	GO:0001666|GO:0006355|GO:0005737|GO:0003700|GO:0006366|GO:0045944|GO:0005634|GO:0003677|GO:0006351	NM_016868
A_51_P101545	6.1926823	P	7.1245666	P	0.524173273264383	    54426	Hgfac	Mus musculus hepatocyte growth factor activator (Hgfac)	 mRNA [NM_019447]	hepatocyte growth factor activator	Mm.27369	 35390866	chr5	 35390807	+	mm|5qB2	NM_019447	chr5:35390807-35390866	GO:0005791|GO:0005737|GO:0016787|GO:0004252|GO:0006508|GO:0008236|GO:0008233|GO:0005576|GO:0003824|GO:0005615	NM_019447
A_51_P101573	11.461649	P	11.337223	P	1.09007394249147	    74764	Klc4	Mus musculus kinesin light chain 4 (Klc4)	 mRNA [NM_029091]	kinesin light chain 4	Mm.279599	 46767792	chr17	 46767733	-	mm|17qC	NM_029091	chr17:46767792-46767733	GO:0008150|GO:0003674|GO:0005871|GO:0005737|GO:0005488|GO:0005874|GO:0005575|GO:0005856|GO:0003777	NM_029091
A_51_P101576	8.734367	P	8.84626	P	0.925373057403464	    55988	Snx12	Mus musculus SDP8 mRNA	 complete cds. [AF062484]	sorting nexin 12	Mm.206949	 98409833	chrX	 98409771	-	mm|XqC3	AF062484	chrX:98409833-98409771	GO:0008150|GO:0003674|GO:0007154|GO:0016020|GO:0006810|GO:0005575|GO:0035091|GO:0015031|GO:0008289
A_51_P101588	6.547827	P	7.402402	P	0.553028217894843	    66548	Adamtsl5	Mus musculus ADAMTS-like 5 (Adamtsl5)	 transcript variant 2	 mRNA [NM_025629]	ADAMTS-like 5	Mm.268527	 79805630	chr10	 79805571	-	mm|10qC1	NM_025629	chr10:79805630-79805571	GO:0008150|GO:0003674|GO:0005575	NM_025629
A_51_P101621	10.54273	P	10.364548	P	1.13145719032075	    12912	Creb1	Mus musculus cAMP responsive element binding protein 1 (Creb1)	 transcript variant B	 mRNA [NM_009952]	cAMP responsive element binding protein 1	Mm.453295	 64648288	chr1	 64648229	+	mm|1qC2	NM_009952	chr1:64648229-64648288	GO:0005515|GO:0008361|GO:0000790|GO:0003700|GO:0006366|GO:0003705|GO:0021983|GO:0032916|GO:0005634|GO:0030879|GO:0007409|GO:0005739|GO:0002756|GO:0003690|GO:0045944|GO:0002755|GO:0046887|GO:0046983|GO:0007179|GO:0040018|GO:0000785|GO:0005667|GO:0006355|GO:0010033|GO:0042493|GO:0042981|GO:0003677|GO:0006351|GO:0043565|GO:0007595|GO:0042752|GO:0005654|GO:0006468|GO:0008134	NM_009952
A_51_P101627	1.9656773	A	1.9478468	A	1.01243585084671	NA		RIKEN cDNA 4930469K13 gene [Source:MGI Symbol;Acc:MGI:1924124] [ENSMUST00000141450]		Mm.437529	 33874193	chr11	 33874134	-	mm|11qA4	AK015529	chr11:33874193-33874134
A_51_P101635	13.834229	P	13.64717	P	1.13844058542893	    56424	Stub1	Mus musculus STIP1 homology and U-Box containing protein 1 (Stub1)	 mRNA [NM_019719]	STIP1 homology and U-Box containing protein 1	Mm.277599	 25967885	chr17	 25967826	-	mm|17qA3.3	NM_019719	chr17:25967885-25967826	GO:0005515|GO:0006511|GO:0004842|GO:0016567|GO:0016874|GO:0034450|GO:0051879|GO:0032436|GO:0000151|GO:0046332|GO:0042803|GO:0051787|GO:0051604|GO:0070534|GO:0005737|GO:0006457|GO:0090035|GO:0031072|GO:0031398|GO:0019900|GO:0030579|GO:0030674|GO:0071218|GO:0000209|GO:0031371|GO:0030911|GO:0006974|GO:0051865|GO:0006281|GO:0005488|GO:0030544|GO:0043161|GO:0006515|GO:0019899|GO:0031943|GO:0042405	NM_019719
A_51_P101660	7.498144	P	7.4321413	P	1.04681224107912	    66874	1200014J11Rik	Mus musculus RIKEN cDNA 1200014J11 gene (1200014J11Rik)	 mRNA [NM_025818]	RIKEN cDNA 1200014J11 gene	Mm.41903	 72893603	chr11	 72893544	+	mm|11qB4	NM_025818	chr11:72893544-72893603	GO:0008150|GO:0003674|GO:0000166|GO:0005575	NM_025818
A_51_P101719	9.504572	P	9.626319	P	0.919074043903899	    67120	Ttc14	Mus musculus tetratricopeptide repeat domain 14 (Ttc14)	 transcript variant 2	 mRNA [NM_025978]	tetratricopeptide repeat domain 14	Mm.275710	 33706256	chr3	 33706197	+	mm|3qA3	NM_025978	chr3:33706197-33706256	GO:0008150|GO:0003674|GO:0005488|GO:0003723|GO:0005575	NM_025978
A_51_P101729	10.809684	P	10.983592	P	0.88643822515093	    12628	Cfh	complement component factor h [Source:MGI Symbol;Acc:MGI:88385] [ENSMUST00000123238]	complement component factor h	Mm.8655	141995500	chr1	141985460	-	mm|1qF	M12660	chr1:141995500-141985460	GO:0030449|GO:0005737|GO:0043499|GO:0005886|GO:0005634|GO:0008201|GO:0005615|GO:0001851
A_51_P101763	7.8018494	P	7.452606	P	1.2738923781588	    12805	Cntn1	Mus musculus contactin 1 (Cntn1)	 transcript variant 2	 mRNA [NM_007727]	contactin 1	Mm.4911	 92170317	chr15	 92170258	+	mm|15qE3	NM_007727	chr15:92170258-92170317	GO:0010628|GO:0090072|GO:0001948|GO:0016020|GO:0007219|GO:0005886|GO:0030246|GO:0031225|GO:0007155|GO:0031175	NM_007727
A_51_P101765	5.9764676	P	5.947615	P	1.02020042015429	    83797	Smarcd1	Mus musculus SWI/SNF related	 matrix associated	 actin dependent regulator of chromatin	 subfamily d	 member 1 (Smarcd1)	 mRNA [NM_031842]	SWI/SNF related	 matrix associated	 actin dependent regulator of chromatin	 subfamily d	 member 1	Mm.273756	 99543817	chr15	 99543759	+	mm|15qF1	NM_031842	chr15:99543759-99543817	GO:0005515|GO:0071565|GO:0032947|GO:0016514|GO:0016585|GO:0006338|GO:0005634|GO:0071564|GO:0048096|GO:0016568|GO:0007399	NM_031842
A_51_P101777	11.683506	P	11.58255	P	1.07248390719450	    67345	Herc4	Mus musculus hect domain and RLD 4 (Herc4)	 transcript variant 2	 mRNA [NM_026101]	hect domain and RLD 4	Mm.234437	 62780312	chr10	 62780253	+	mm|10qB4	NM_026101	chr10:62780253-62780312	GO:0005622|GO:0005737|GO:0004842|GO:0016567|GO:0042787|GO:0016881|GO:0016874|GO:0007283|GO:0030154|GO:0006464	NM_026101
A_51_P101787	4.288452	P	5.773242	P	0.357300540141241	    12950	Hapln1	Mus musculus hyaluronan and proteoglycan link protein 1 (Hapln1)	 mRNA [NM_013500]	hyaluronan and proteoglycan link protein 1	Mm.266790	 89747723	chr13	 89747664	+	mm|13qC3	NM_013500	chr13:89747664-89747723	GO:0005540|GO:0005488|GO:0005578|GO:0005576|GO:0007155	NM_013500
A_51_P101858	9.217684	P	8.920095	P	1.22908867030288	    13383	Dlg1	Mus musculus discs	 large homolog 1 (Drosophila) (Dlg1)	 mRNA [NM_007862]	discs	 large homolog 1 (Drosophila)	Mm.382	 31863321	chr16	 31863262	+	mm|16qB2	NM_007862	chr16:31863262-31863321	GO:0005515|GO:0001657|GO:0001658|GO:0030054|GO:0031594|GO:0050680|GO:0045202|GO:0043268|GO:0048704|GO:0042130|GO:0048608|GO:0016337|GO:0009925|GO:0070830|GO:0030838|GO:0048745|GO:0045211|GO:0019717|GO:0002369|GO:0019901|GO:0019902|GO:0014069|GO:0030165|GO:0030432|GO:0042734|GO:0042110|GO:0048639|GO:0045930|GO:0045121|GO:0005923|GO:0031579|GO:0008284|GO:0005886|GO:0005783|GO:0097025|GO:0005634|GO:0005829|GO:0032147|GO:0032880|GO:0016323|GO:0005737|GO:0008104|GO:0005913|GO:0002088|GO:0042391|GO:0048729|GO:0007015|GO:0040018|GO:0097016|GO:0060022|GO:0001772|GO:0001771|GO:0031253|GO:0030315|GO:0042982|GO:0008022|GO:0072659|GO:0016328|GO:0032947|GO:0033268|GO:0016020|GO:0035255|GO:0030866|GO:0001935|GO:0043219	NM_007862
A_51_P101879	12.666597	P	12.095987	P	1.48515138927652	    67738	Ppid	Mus musculus peptidylprolyl isomerase D (cyclophilin D) (Ppid)	 mRNA [NM_026352]	peptidylprolyl isomerase D (cyclophilin D)	Mm.295252	 79407541	chr3	 79407482	+	mm|3qE3	NM_026352	chr3:79407482-79407541	GO:0042277|GO:0005737|GO:0006457|GO:0005488|GO:0031072|GO:0003755|GO:0005528|GO:0045111|GO:0016853	NM_026352
A_51_P101929	15.2310705	P	15.648599	P	0.748706144731203	    16854	Lgals3	Mus musculus lectin	 galactose binding	 soluble 3 (Lgals3)	 transcript variant 2	 mRNA [NM_010705]	lectin	 galactose binding	 soluble 3	Mm.248615	 48005214	chr14	 48004398	+	mm|14qC1	NM_010705	chr14:48004398-48005214	GO:0005515|GO:0005737|GO:0001501|GO:0030198|GO:0005743|GO:0005578|GO:0005529|GO:0005634	NM_010705
A_51_P101950	3.5421557	A	2.8740747	A	1.58895800961077	   259107	Olfr555	Mus musculus olfactory receptor 555 (Olfr555)	 mRNA [NM_147103]	olfactory receptor 555	Mm.377849	109807762	chr7	109807703	+	mm|7qE3	NM_147103	chr7:109807703-109807762	GO:0007608|GO:0007165|GO:0004984|GO:0007186|GO:0004930|GO:0004872|GO:0016021|GO:0004871	NM_147103
A_51_P101955	9.099311	P	8.596167	P	1.41729885457394	    16993	Lta4h	Mus musculus leukotriene A4 hydrolase (Lta4h)	 mRNA [NM_008517]	leukotriene A4 hydrolase	Mm.271071	 92937701	chr10	 92937304	+	mm|10qC2	NM_008517	chr10:92937304-92937701	GO:0019370|GO:0005737|GO:0004177|GO:0008270|GO:0005634|GO:0004463|GO:0043171|GO:0006691|GO:0004301	NM_008517
A_51_P101975	5.6788435	P	5.901923	P	0.856734742927685	    14179	Fgf8	Mus musculus fibroblast growth factor 8 (Fgf8)	 transcript variant 1	 mRNA [NM_010205]	fibroblast growth factor 8	Mm.4012	 45811423	chr19	 45811364	-	mm|19qC3	NM_010205	chr19:45811423-45811364	GO:0008406|GO:0001658|GO:0005111|GO:0001759|GO:0030878|GO:0009792|GO:0005615|GO:0007507|GO:0001947|GO:0030539|GO:0043524|GO:0021798|GO:0000165|GO:0051781|GO:0006979|GO:0021543|GO:0042472|GO:0023019|GO:0021544|GO:0030916|GO:0045840|GO:0030509|GO:0042056|GO:0060348|GO:0008045|GO:0045165|GO:0008543|GO:0030917|GO:0021884|GO:0008083|GO:0009897|GO:0060445|GO:0021846|GO:0008284|GO:0007368|GO:0030324|GO:0060425|GO:0048699|GO:0001839|GO:0060129|GO:0060128|GO:0021537|GO:0033563|GO:0008078|GO:0060070|GO:0035108|GO:0055026|GO:0090134|GO:0001569|GO:0043066|GO:0046622|GO:0035050|GO:0001822|GO:0060563|GO:0021954|GO:0006915|GO:0005625|GO:0005576|GO:0005105|GO:0048853|GO:0010628|GO:0003007|GO:0001974|GO:0071542|GO:0035116|GO:0042487	NM_010205
A_51_P101985	6.3889294	P	4.773516	P	3.06399384679072	   216613	Ccdc85a	Mus musculus coiled-coil domain containing 85A (Ccdc85a)	 transcript variant 3	 mRNA [NM_001166662]	coiled-coil domain containing 85A	Mm.93759	 28475463	chr11	 28475404	-	mm|11qA3.3	NM_001166662	chr11:28475463-28475404	GO:0008150|GO:0003674|GO:0005575	NM_001166662
A_51_P102005	2.5889192	A	2.929902	A	0.789503299206604	   209047	Gipc3	Mus musculus GIPC PDZ domain containing family	 member 3 (Gipc3)	 mRNA [NM_148951]	GIPC PDZ domain containing family	 member 3	Mm.218755	 80803939	chr10	 80803069	-	mm|10qC1	NM_148951	chr10:80803939-80803069	GO:0008150|GO:0005575	NM_148951
A_51_P102081	6.797945	P	7.0261025	P	0.853724507617784	    13222	Defa-rs2	Mus musculus defensin	 alpha	 related sequence 2 (Defa-rs2)	 mRNA [NM_007847]	defensin	 alpha	 related sequence 2	Mm.422993	NA		NA			NM_007847		GO:0006952|GO:0005576|GO:0005615	NM_007847
A_51_P102090	7.037277	P	7.7504597	P	0.609973004489607	   269536	Tex10	testis expressed gene 10 [Source:MGI Symbol;Acc:MGI:1344413] [ENSMUST00000132911]	testis expressed gene 10		 48482407	chr4	 48482348	-	mm|4qB1	AK011904	chr4:48482407-48482348	GO:0008150|GO:0003674|GO:0016020|GO:0005488|GO:0071339|GO:0005634|GO:0016021
A_51_P102096	9.313387	P	9.871478	P	0.679200299417996	    17869	Myc	Mus musculus myelocytomatosis oncogene (Myc)	 transcript variant 1	 mRNA [NM_010849]	myelocytomatosis oncogene	Mm.2444	 61821576	chr15	 61821516	+	mm|15qD1	NM_010849	chr15:61821516-61821576	GO:0005515|GO:0010468|GO:0001658|GO:0003700|GO:0006366|GO:0048705|GO:0003690|GO:0016485|GO:0002904|GO:0016055|GO:0090096|GO:0046982|GO:0005819|GO:0070888|GO:0000122|GO:0043279|GO:0043085|GO:0005654|GO:0045893|GO:0032091|GO:0030424|GO:0008284|GO:0001783|GO:0001836|GO:0005634|GO:0071445|GO:0005737|GO:0045944|GO:0006006|GO:0042474|GO:0008634|GO:0009314|GO:0006352|GO:0008633|GO:0006355|GO:0006919|GO:0005730|GO:0002053|GO:0042981|GO:0003677|GO:0006351|GO:0043565|GO:0007346|GO:0016604|GO:0006309|GO:0050910|GO:0043473|GO:0032204|GO:0008629	NM_010849
A_51_P102106	2.1445484	A	2.1294389	A	1.01052814227437	   258361	Olfr495	Mus musculus olfactory receptor 495 (Olfr495)	 mRNA [NM_146364]	olfactory receptor 495	Mm.223052	115539576	chr7	115539517	+	mm|7qE3	NM_146364	chr7:115539517-115539576	GO:0007608|GO:0007165|GO:0004984|GO:0016020|GO:0007186|GO:0005886|GO:0004930|GO:0004872|GO:0016021|GO:0004871|GO:0050896	NM_146364
A_51_P102122	2.0564902	A	2.444373	A	0.764250343150999	    17928	Myog	Mus musculus myogenin (Myog)	 mRNA [NM_031189]	myogenin	Mm.16528	136188933	chr1	136188874	+	mm|1qE4	NM_031189	chr1:136188874-136188933	GO:0071285|GO:0006355|GO:0003700|GO:0006366|GO:0003705|GO:0048741|GO:0005634|GO:0007275|GO:0003677|GO:0030154|GO:0051149|GO:0007517|GO:0071363|GO:0001503|GO:0007519|GO:0045944|GO:0005654|GO:0045893	NM_031189
A_51_P102174	6.889898	P	6.3295984	P	1.47457540599381	    70790	Ubr5	Mus musculus ubiquitin protein ligase E3 component n-recognin 5 (Ubr5)	 transcript variant 1	 mRNA [NM_001081359]	ubiquitin protein ligase E3 component n-recognin 5	Mm.476840	 37897542	chr15	 37897483	-	mm|15qB3.1	NM_001081359	chr15:37897542-37897483	GO:0000209|GO:0050847|GO:0004842|GO:0033160|GO:0016881|GO:0003723|GO:0016874|GO:0090263|GO:0034450|GO:0005634|GO:0035413|GO:0046872|GO:0006974|GO:0005622|GO:0042787|GO:0008270|GO:0006464	NM_001081359
A_51_P102180	3.7402902	A	3.6373985	A	1.07392385145069	NA					114984231	chr7	114984172	-	mm|7qE3		chr7:114984231-114984172
A_51_P102235	13.630884	P	13.387175	P	1.18403276145533	    18555	Cdk16	Mus musculus cyclin-dependent kinase 16 (Cdk16)	 mRNA [NM_011049]	cyclin-dependent kinase 16	Mm.102574	 20276877	chrX	 20276818	+	mm|XqA1.3	NM_011049	chrX:20276818-20276877	GO:0016310|GO:0004672|GO:0000166|GO:0016301|GO:0004674|GO:0006468|GO:0005524|GO:0016740|GO:0016772|GO:0004693	NM_011049
A_51_P102249	6.3704	P	7.0642514	P	0.618201302948471	   235184	BC024479	Mus musculus 10	 11 days embryo whole body cDNA	 RIKEN full-length enriched library	 clone:2810450G17 product:unclassifiable	 full insert sequence. [AK013318]	cDNA sequence BC024479	Mm.453378	 37323657	chr9	 37323598	+	mm|9qA4	AK013318	chr9:37323598-37323657	GO:0008150|GO:0003674|GO:0005575
A_51_P102257	8.614999	P	9.32144	P	0.612830072778786	    21961	Tns1	tensin 1 [Source:MGI Symbol;Acc:MGI:104552] [ENSMUST00000050681]	tensin 1	Mm.309975	 74036446	chr1	 74036387	-	mm|1qC3	AK053112	chr1:74036446-74036387	GO:0010761|GO:0030055|GO:0007044|GO:0003779|GO:0005925|GO:0046872
A_51_P102296	5.8682957	P	5.8112583	P	1.04032723530831	    17355	Aff1	Mus musculus 16 days neonate cerebellum cDNA	 RIKEN full-length enriched library	 clone:9630032B01 product:unclassifiable	 full insert sequence. [AK079341]	AF4/FMR2 family	 member 1		104284561	chr5	104284502	-	mm|5qE5	AK079341	chr5:104284561-104284502	GO:0006355|GO:0003700|GO:0005634|GO:0045893|GO:0006351
A_51_P102311	2.3645482	A	2.419542	A	0.96259857987231	    22173	Tyr	Mus musculus tyrosinase (Tyr)	 mRNA [NM_011661]	tyrosinase	Mm.238127	 94576324	chr7	 94576265	-	mm|7qD3	NM_011661	chr7:94576324-94576265	GO:0005515|GO:0042470|GO:0048471|GO:0046982|GO:0005507|GO:0008283|GO:0048538|GO:0046872|GO:0042803|GO:0004503|GO:0004497|GO:0005737|GO:0016020|GO:0042438|GO:0008152|GO:0043473|GO:0016491|GO:0016021|GO:0055114	NM_011661
A_51_P102319	8.042615	P	8.263163	P	0.858239376875712	    75974	Dock11	dedicator of cytokinesis 11 [Source:MGI Symbol;Acc:MGI:1923224] [ENSMUST00000145757]	dedicator of cytokinesis 11		 33523598	chrX	 33523539	+	mm|XqA3.2	AK033257	chrX:33523539-33523598	GO:0005085|GO:0050790|GO:0051020|GO:0017048|GO:0005575|GO:0005525|GO:0005089
A_51_P102339	8.923504	P	8.996155	P	0.950889101438	    22367	Vrk1	Mus musculus vaccinia related kinase 1 (Vrk1)	 transcript variant 3	 mRNA [NM_001029844]	vaccinia related kinase 1	Mm.2981	107297880	chr12	107296900	+	mm|12qF1	NM_001029844	chr12:107296900-107297880	GO:0005730|GO:0005634|GO:0005524|GO:0016310|GO:0005737|GO:0004672|GO:0046777|GO:0000166|GO:0004674|GO:0016301|GO:0006468|GO:0016740|GO:0016772	NM_001029844
A_51_P102355	7.073141	P	7.6981792	P	0.648402608549799	   226470	Zbtb41	Mus musculus zinc finger and BTB domain containing 41 homolog (Zbtb41)	 mRNA [NM_172643]	zinc finger and BTB domain containing 41 homolog	Mm.119711	141345397	chr1	141345338	+	mm|1qF	NM_172643	chr1:141345338-141345397	GO:0005622|GO:0008150|GO:0003674|GO:0006355|GO:0008270|GO:0005634|GO:0005575|GO:0003676|GO:0003677|GO:0046872|GO:0006351	NM_172643
A_51_P102393	1.9211402	A	1.9299097	A	0.993939882834906	   231004	Samd11	Mus musculus sterile alpha motif domain containing 11	 mRNA (cDNA clone MGC:38976 IMAGE:5363470)	 complete cds. [BC026991]	sterile alpha motif domain containing 11		NA		NA			BC026991		GO:0005634|GO:0000122|GO:0043621|GO:0042731|GO:0032093
A_51_P102421	6.5630417	P	7.3060493	P	0.597492454878501	    56708	Clcf1	Mus musculus cardiotrophin-like cytokine factor 1 (Clcf1)	 mRNA [NM_019952]	cardiotrophin-like cytokine factor 1	Mm.347919	  4222539	chr19	  4222480	+	mm|19qA	NM_019952	chr19:4222480-4222539	GO:0008284|GO:0048295|GO:0046982|GO:0030890|GO:0042517|GO:0050727|GO:0005102|GO:0005576|GO:0005125|GO:0005615|GO:0007259|GO:0051896|GO:0005127|GO:0005622|GO:0043524|GO:0048711|GO:0002639|GO:0030183|GO:0002830|GO:0070372|GO:0051466|GO:0007166	NM_019952
A_51_P102438	2.451697	A	2.1647544	A	1.22005196752818	   231396	Ugt2b36	Mus musculus UDP glucuronosyltransferase 2 family	 polypeptide B36 (Ugt2b36)	 mRNA [NM_001029867]	UDP glucuronosyltransferase 2 family	 polypeptide B36	Mm.439851	 87509913	chr5	 87495455	-	mm|5qE1	NM_001029867	chr5:87509913-87495455	GO:0008150|GO:0003674|GO:0016757|GO:0005575|GO:0016740	NM_001029867
A_51_P102459	10.507744	P	4.814617	P	51.7370898031778	    57340	Jph3	Mus musculus junctophilin 3 (Jph3)	 mRNA [NM_020605]	junctophilin 3	Mm.306870	124314550	chr8	124314491	+	mm|8qE1	NM_020605	chr8:124314491-124314550	GO:0040011|GO:0005792|GO:0016020|GO:0005886|GO:0005783|GO:0016021	NM_020605
A_51_P102471	8.013711	P	8.921255	P	0.533091838471708	    57757	Pglyrp2	Mus musculus peptidoglycan recognition protein 2 (Pglyrp2)	 mRNA [NM_021319]	peptidoglycan recognition protein 2	Mm.86752	 32550375	chr17	 32550316	-	mm|17qB1	NM_021319	chr17:32550375-32550316	GO:0009253|GO:0002221|GO:0016019|GO:0016787|GO:0016020|GO:0050830|GO:0042834|GO:0008745|GO:0008270|GO:0005576|GO:0016045|GO:0046872	NM_021319
A_51_P102487	3.4551938	A	4.989794	P	0.345174980070698	    58178	Sorcs1	Mus musculus VPS10 domain receptor protein SORCS 1 (Sorcs1)	 mRNA [NM_021377]	VPS10 domain receptor protein SORCS 1	Mm.313672	 50249575	chr19	 50243085	-	mm|19qD1	NM_021377	chr19:50249575-50243085	GO:0016020|GO:0016021	NM_021377
A_51_P102503	12.457199	P	12.263117	P	1.14399599387898	    75624	Metap1	Mus musculus methionyl aminopeptidase 1 (Metap1)	 mRNA [NM_175224]	methionyl aminopeptidase 1	Mm.26833	138122199	chr3	138122140	-	mm|3qG3	NM_175224	chr3:138122199-138122140	GO:0008150|GO:0003674|GO:0016787|GO:0009987|GO:0004177|GO:0008235|GO:0006508|GO:0008233|GO:0005575|GO:0046872	NM_175224
A_51_P102507	9.831902	P	9.792217	P	1.02788937138782	    77573	Vps33a	Mus musculus vacuolar protein sorting 33A (yeast) (Vps33a)	 mRNA [NM_029929]	vacuolar protein sorting 33A (yeast)	Mm.41372	123979502	chr5	123979443	-	mm|5qF	NM_029929	chr5:123979502-123979443	GO:0032418|GO:0048471|GO:0048070|GO:0005770|GO:0043473|GO:0032400|GO:0031410|GO:0016192|GO:0032403|GO:0030220|GO:0005769	NM_029929
A_51_P102518	2.5295324	A	2.9991188	A	0.722171604339967	    75667	Tmem225	Mus musculus transmembrane protein 225 (Tmem225)	 mRNA [NM_029379]	transmembrane protein 225	Mm.45821	 39958416	chr9	 39958357	+	mm|9qA5.1	NM_029379	chr9:39958357-39958416	GO:0008150|GO:0003674|GO:0016020|GO:0016021|GO:0005575	NM_029379
A_51_P102538	3.2866702	A	2.7044187	A	1.49718396290843	    21906	Otop1	Mus musculus otopetrin 1 (Otop1)	 mRNA [NM_172709]	otopetrin 1	Mm.204765	 38694796	chr5	 38694737	+	mm|5qB3	NM_172709	chr5:38694737-38694796	GO:0009590|GO:0042472|GO:0016020|GO:0005576|GO:0016021|GO:0031214	NM_172709
A_51_P102607	7.4164243	P	7.588991	P	0.88726274622923	    69498	2310007H11Rik	Mus musculus 10 days neonate cerebellum cDNA	 RIKEN full-length enriched library	 clone:B930089N03 product:Hypothetical Gag gene protein p24	 full insert sequence. [AK081116]	RIKEN cDNA 2310007H11 gene	Mm.229463	164352551	chr2	164352492	+	mm|2qH3	AK081116	chr2:164352492-164352551	GO:0008150|GO:0003674|GO:0005575
A_51_P102631	9.555422	P	8.676447	P	1.83906822340335	    66226	Trappc2	trafficking protein particle complex 2 [Source:MGI Symbol;Acc:MGI:1913476] [ENSMUST00000116495]	trafficking protein particle complex 2	Mm.279752	162890973	chrX	162890914	+	mm|XqF5	AK077643	chrX:162890914-162890973	GO:0005515|GO:0006355|GO:0030008|GO:0008134
A_51_P102652	10.749028	P	10.977608	P	0.853474527002848	    67881	Mdp1	Mus musculus magnesium-dependent phosphatase 1 (Mdp1)	 transcript variant 1	 mRNA [NM_023397]	magnesium-dependent phosphatase 1	Mm.24601	 56278088	chr14	 56277904	-	mm|14qC3	NM_023397	chr14:56278088-56277904	GO:0016791|GO:0016787|GO:0030389|GO:0016311|GO:0004721|GO:0005575|GO:0046872|GO:0004725	NM_023397
A_51_P102731	3.260705	A	4.26559	P	0.498309851068704	   654802	1700105P06Rik	Mus musculus adult male testis cDNA	 RIKEN full-length enriched library	 clone:1700105P06 product:hypothetical protein	 full insert sequence. [AK018939]	RIKEN cDNA 1700105P06 gene	Mm.414924	  7457981	chr19	  7457922	+	mm|19qA	AK018939	chr19:7457922-7457981	GO:0008150|GO:0003674|GO:0005575
A_51_P102734	6.7301435	P	7.3982344	P	0.62933893269553	   654802	1700105P06Rik	Mus musculus adult male testis cDNA	 RIKEN full-length enriched library	 clone:1700105P06 product:hypothetical protein	 full insert sequence. [AK018939]	RIKEN cDNA 1700105P06 gene	Mm.414924	  7457931	chr19	  7457872	+	mm|19qA	AK018939	chr19:7457872-7457931	GO:0008150|GO:0003674|GO:0005575
A_51_P102740	5.229353	P	5.7170367	P	0.713169198507916	NA		Mus musculus 13 days embryo lung cDNA	 RIKEN full-length enriched library	 clone:D430004L15 product:unclassifiable	 full insert sequence. [AK084873]			101483063	chr4	101483004	+	mm|4qC6	AK084873	chr4:101483004-101483063
A_51_P102782	11.017176	P	10.846974	P	1.12521602160293	    12040	Bckdhb	Mus musculus branched chain ketoacid dehydrogenase E1	 beta polypeptide (Bckdhb)	 nuclear gene encoding mitochondrial protein	 mRNA [NM_199195]	branched chain ketoacid dehydrogenase E1	 beta polypeptide	Mm.12819	 84017597	chr9	 84015952	+	mm|9qE2	NM_199195	chr9:84015952-84017597	GO:0005739|GO:0003863|GO:0008152|GO:0016491|GO:0005743|GO:0005947|GO:0009083|GO:0009063|GO:0003824|GO:0032403|GO:0003826|GO:0055114	NM_199195
A_51_P102789	12.54927	P	13.279762	P	0.602698341535541	    12262	C1qc	Mus musculus complement component 1	 q subcomponent	 C chain (C1qc)	 mRNA [NM_007574]	complement component 1	 q subcomponent	 C chain	Mm.439732	136445825	chr4	136445766	-	mm|4qD3	NM_007574	chr4:136445825-136445766	GO:0005581|GO:0030853|GO:0005576|GO:0045650	NM_007574
A_51_P102809	9.834233	P	9.988062	P	0.898861660723078	    14670	Gnl1	Mus musculus guanine nucleotide binding protein-like 1 (Gnl1)	 mRNA [NM_008136]	guanine nucleotide binding protein-like 1	Mm.335754	 36125101	chr17	 36124817	+	mm|17qB1	NM_008136	chr17:36124817-36125101	GO:0005575|GO:0005525|GO:0006974	NM_008136
A_51_P102860	9.84973	P	10.064337	P	0.861780882749216	    80517	Herpud2	Mus musculus HERPUD family member 2 (Herpud2)	 mRNA [NM_020586]	HERPUD family member 2	Mm.142843	 24912869	chr9	 24912810	-	mm|9qA4	NM_020586	chr9:24912869-24912810	GO:0006986|GO:0008150|GO:0003674|GO:0016020|GO:0016021|GO:0005575	NM_020586
A_51_P102867	7.71587	P	8.270983	P	0.680603747443709	   236082	Dhrsx	Mus musculus dehydrogenase/reductase (SDR family) X chromosome (Dhrsx)	 mRNA [NM_001033326]	dehydrogenase/reductase (SDR family) X chromosome	Mm.305345	   125319	chr4_random	   125018	+		NM_001033326	chr4_random:125018-125319	GO:0008150|GO:0003674|GO:0005575	NM_001033326
A_51_P102883	13.910498	P	13.776507	P	1.09732509208775	    17833	Muc5ac	Mus musculus mucin 5	 subtypes A and C	 tracheobronchial/gastric (Muc5ac)	 mRNA [NM_010844]	mucin 5	 subtypes A and C	 tracheobronchial/gastric	Mm.334332	149004852	chr7	149004793	+	mm|7qF5	NM_010844	chr7:149004793-149004852	GO:0005515|GO:0044464|GO:0043205|GO:0043206	NM_010844
A_51_P102911	2.1449158	A	2.137628	A	1.00506429845078	    15396	Hoxa11	Mus musculus homeobox A11 (Hoxa11)	 mRNA [NM_010450]	homeobox A11	Mm.26954	 52192166	chr6	 52192107	-	mm|6qB3	NM_010450	chr6:52192166-52192107	GO:0005515|GO:0001656|GO:0001658|GO:0003700|GO:0005634|GO:0009954|GO:0001759|GO:0009953|GO:0030326|GO:0009952|GO:0048589|GO:0032993|GO:0060351|GO:0032332|GO:0005667|GO:0006355|GO:0010720|GO:0007275|GO:0003677|GO:0006351|GO:0043565|GO:0043234|GO:0007501|GO:0001501|GO:0042733	NM_010450
A_51_P102943	9.11551	P	9.415553	P	0.812228187267305	    15499	Hsf1	Mus musculus heat shock factor 1 (Hsf1)	 mRNA [NM_008296]	heat shock factor 1	Mm.347444	 76331157	chr15	 76331098	+	mm|15qD3	NM_008296	chr15:76331098-76331157	GO:0006355|GO:0003700|GO:0008285|GO:0009408|GO:0060136|GO:0006950|GO:0032720|GO:0001892|GO:0005634|GO:0006952|GO:0007283|GO:0001701|GO:0003677|GO:0006351|GO:0043565|GO:0043234|GO:0005737|GO:0032496|GO:0006468|GO:0045120|GO:0040018	NM_008296
A_51_P102970	2.1338756	A	2.1843948	A	0.965588768355473	NA		Mus musculus activated spleen cDNA	 RIKEN full-length enriched library	 clone:F830006N19 product:unclassifiable	 full insert sequence. [AK089647]			 78312479	chr2	 78312420	-	mm|2qC3	AK089647	chr2:078312479-078312420
A_51_P102987	11.765123	P	11.942934	P	0.884043337413661	    18619	Penk	Mus musculus preproenkephalin (Penk)	 mRNA [NM_001002927]	preproenkephalin	Mm.475097	  4060794	chr4	  4060735	-	mm|4qA1	NM_001002927	chr4:4060794-4060735	GO:0007218|GO:0001515|GO:0007610|GO:0005576|GO:0001662|GO:0019233	NM_001002927
A_51_P103000	13.447065	P	14.066593	P	0.650883839607155	    18739	Pitpnm1	Mus musculus phosphatidylinositol transfer protein	 membrane-associated 1 (Pitpnm1)	 transcript variant 1	 mRNA [NM_008851]	phosphatidylinositol transfer protein	 membrane-associated 1	Mm.1860	  4113948	chr19	  4113889	+	mm|19qA	NM_008851	chr19:4113889-4113948	GO:0005811|GO:0005622|GO:0005737|GO:0005794|GO:0005543|GO:0016020|GO:0005783|GO:0006810|GO:0015031|GO:0046872	NM_008851
A_51_P103007	9.544914	P	9.799128	P	0.838443805914941	    16409	Itgam	Mus musculus integrin alpha M (Itgam)	 transcript variant 2	 mRNA [NM_008401]	integrin alpha M	Mm.262106	135260993	chr7	135260933	+	mm|7qF3	NM_008401	chr7:135260933-135260993	GO:0008305|GO:0046982|GO:0009986|GO:0030593|GO:0043395|GO:0001846|GO:0005634|GO:0014005|GO:0016337|GO:0001948|GO:0016020|GO:0007229|GO:0045123|GO:0007159|GO:0050798|GO:0004872|GO:0016021|GO:0007155|GO:0008201|GO:0009897	NM_008401
A_51_P103054	2.1036413	A	2.1273184	A	0.983722223366536	   240322	Adamts19	Mus musculus a disintegrin-like and metallopeptidase (reprolysin type) with thrombospondin type 1 motif	 19 (Adamts19)	 mRNA [NM_175506]	a disintegrin-like and metallopeptidase (reprolysin type) with thrombospondin type 1 motif	 19	Mm.71963	 59213030	chr18	 59212971	+	mm|18qD3	NM_175506	chr18:59212971-59213030	GO:0031012|GO:0016787|GO:0006508|GO:0005578|GO:0008270|GO:0008233|GO:0005576|GO:0004222|GO:0046872|GO:0008237	NM_175506
A_51_P103069	11.478885	P	11.486726	P	0.994579775669795	NA		BB480924 RIKEN full-length enriched	 13 days embryo lung Mus musculus cDNA clone D430001B14 3'. [BB480924]		Mm.406382	157670928	chr3	157670868	+	mm|3qH4	BB480924	chr3:157670868-157670928
A_51_P103081	2.0054243	A	2.0191784	A	0.990511685202848	100043147	Gm4262	PREDICTED: Mus musculus predicted gene 4262 (Gm4262)	 partial miscRNA [XR_105756]	predicted gene 4262	Mm.392297	 11014561	chr16	 11014502	+	mm|16qA1	XR_105756	chr16:11014502-11014561	GO:0008150|GO:0003674|GO:0005575	XR_105756
A_51_P103114	8.415905	P	8.199452	P	1.16187349790593	    19270	Ptprg	Mus musculus protein tyrosine phosphatase	 receptor type	 G (Ptprg)	 mRNA [NM_008981]	protein tyrosine phosphatase	 receptor type	 G	Mm.431266	 13070266	chr14	 13069645	+	mm|14qA1	NM_008981	chr14:13069645-13070266	GO:0016791|GO:0006470|GO:0016787|GO:0016020|GO:0016311|GO:0010977|GO:0004721|GO:0016021|GO:0005615|GO:0035335|GO:0004725|GO:0042802	NM_008981
A_51_P103117	2.3194323	A	2.288133	A	1.02193206967956	   237694	4932414J04Rik	Mus musculus RIKEN cDNA 4932414J04 gene (4932414J04Rik)	 non-coding RNA [NR_028259]	4932414J04 protein	Mm.72926	 21404260	chr11	 21404201	-	mm|11qA3.1	NR_028259	chr11:21404260-21404201	GO:0008150|GO:0003674|GO:0005575	NR_028259
A_51_P103133	3.1656258	A	3.7964778	A	0.645794921130624	NA					NA		NA
A_51_P103144	2.088651	A	2.2462685	A	0.89650435718441	    28248	Slco1a1	Mus musculus strain CAST/Ei solute carrier family 21 member 1 (Slc21a1) mRNA	 complete cds. [AY195869]	solute carrier organic anion transporter family	 member 1a1	Mm.103665	141857472	chr6	141857413	-	mm|6qG2	AY195869	chr6:141857472-141857413	GO:0016323|GO:0005215|GO:0034220|GO:0016020|GO:0005886|GO:0005887|GO:0015711|GO:0006810|GO:0005624|GO:0008514|GO:0016021|GO:0006811
A_51_P103172	4.7528763	P	5.3472776	P	0.66231925219837	NA		Q8R4C3_CRIGR (Q8R4C3) Csr1	 partial (41%) [TC1641772]			 74712010	chr17	 74711951	+	mm|17qE2		chr17:074711951-074712010
A_51_P103179	5.046816	P	5.70289	P	0.634602891557906	   320106	Slc38a11	solute carrier family 38	 member 11 [Source:MGI Symbol;Acc:MGI:2443383] [ENSMUST00000155422]	solute carrier family 38	 member 11	Mm.227703	 65187639	chr2	 65187580	-	mm|2qC1.3	AK034126	chr2:65187639-65187580	GO:0008150|GO:0003674|GO:0016020|GO:0006865|GO:0006810|GO:0016021|GO:0005575|GO:0006814|GO:0006811
A_51_P103209	13.945871	P	13.714667	P	1.17381414624403	   225049	Ttc7	Mus musculus tetratricopeptide repeat domain 7 (Ttc7)	 mRNA [NM_028639]	tetratricopeptide repeat domain 7	Mm.77396	 87781006	chr17	 87780947	+	mm|17qE4	NM_028639	chr17:87780947-87781006	GO:0030097|GO:0006879|GO:0005488	NM_028639
A_51_P103222	16.163214	P	16.334496	P	0.888053193334197	    72027	Slc39a4	Mus musculus solute carrier family 39 (zinc transporter)	 member 4 (Slc39a4)	 mRNA [NM_028064]	solute carrier family 39 (zinc transporter)	 member 4	Mm.276829	 76442925	chr15	 76442866	-	mm|15qD3	NM_028064	chr15:76442925-76442866	GO:0071577|GO:0005886|GO:0006882|GO:0034224|GO:0055085|GO:0030001|GO:0016324|GO:0005385|GO:0016020|GO:0046873|GO:0006810|GO:0016023|GO:0006829|GO:0016021|GO:0005768|GO:0006811	NM_028064
A_51_P103229	10.010227	P	10.594633	P	0.66692387420793	    19712	Rest	RE1-silencing transcription factor [Source:MGI Symbol;Acc:MGI:104897] [ENSMUST00000080359]	RE1-silencing transcription factor	Mm.28840	 77715221	chr5	 77715162	+	mm|5qC3.3	AK011349	chr5:77715162-77715221	GO:0005515|GO:0000987|GO:0008285|GO:0044212|GO:0005634|GO:0032403|GO:0046872|GO:0005622|GO:0071257|GO:0005737|GO:0015271|GO:0050768|GO:0017053|GO:0034765|GO:0001046|GO:0046676|GO:0000785|GO:0071805|GO:0070933|GO:0005262|GO:0006355|GO:2000706|GO:0043065|GO:2000740|GO:0001047|GO:0000122|GO:0003676|GO:0003677|GO:0035690|GO:0006351|GO:0043922|GO:0071385|GO:0043280|GO:0043234|GO:0001078|GO:0045955|GO:0045665|GO:0003682|GO:2000065|GO:0010629|GO:0070588|GO:0008270|GO:0045893|GO:0045892|GO:0032348
A_51_P103237	10.056229	P	9.572756	P	1.39810527757912	    26559	Hunk	Mus musculus hormonally upregulated Neu-associated kinase (Hunk)	 mRNA [NM_015755]	hormonally upregulated Neu-associated kinase	Mm.125874	 90499725	chr16	 90499667	+	mm|16qC3.3	NM_015755	chr16:90499667-90499725	GO:0016310|GO:0004672|GO:0000166|GO:0016301|GO:0004674|GO:0006468|GO:0005524|GO:0016740|GO:0016772	NM_015755
A_51_P103254	6.564907	P	6.7350655	P	0.888745034871018	   399558	Flrt2	Mus musculus fibronectin leucine rich transmembrane protein 2 (Flrt2)	 mRNA [NM_201518]	fibronectin leucine rich transmembrane protein 2	Mm.341948	 97018405	chr12	 97018346	+	mm|12qE	NM_201518	chr12:97018346-97018405	GO:0016021	NM_201518
A_51_P103261	3.2865522	A	2.9341052	A	1.27672428370667	    20504	Slc17a1	Mus musculus solute carrier family 17 (sodium phosphate)	 member 1 (Slc17a1)	 transcript variant 1	 mRNA [NM_009198]	solute carrier family 17 (sodium phosphate)	 member 1	Mm.2656	 23987255	chr13	 23987196	+	mm|13qA3.1	NM_009198	chr13:23987196-23987255	GO:0044341|GO:0015321|GO:0005886|GO:0046415	NM_009198
A_51_P103298	6.235131	P	5.5218844	P	1.63948942940931	   210162	Zkscan2	Mus musculus zinc finger with KRAB and SCAN domains 2 (Zkscan2)	 mRNA [NM_001081329]	zinc finger with KRAB and SCAN domains 2	Mm.135397	130623265	chr7	130623206	-	mm|7qF3	NM_001081329	chr7:130623265-130623206	GO:0008150|GO:0003674|GO:0005575	NM_001081329
A_51_P103320	8.701229	P	8.696266	P	1.00344601335582	   108829	Jmjd1c	Mus musculus jumonji domain containing 1C (Jmjd1c)	 transcript variant 2	 mRNA [NM_001242396]	jumonji domain containing 1C	Mm.23846	 66718210	chr10	 66717287	+	mm|10qB5.1	NM_001242396	chr10:66717287-66718210	GO:0032454|GO:0005654|GO:0033169	NM_001242396
A_51_P103328	2.3555384	A	3.082096	A	0.604344214417298	   243377	Svs1	Mus musculus seminal vesicle secretory protein 1 (Svs1)	 mRNA [NM_172888]	seminal vesicle secretory protein 1	Mm.446302	 48938719	chr6	 48938660	+	mm|6qB2.3	NM_172888	chr6:48938660-48938719	GO:0008150|GO:0003674|GO:0005575	NM_172888
A_51_P103364	14.646024	P	15.678454	P	0.488886000926374	NA		immunoglobulin heavy variable 1-85 [Source:MGI Symbol;Acc:MGI:3645723] [ENSMUST00000103552]		Mm.357651	117238298	chr12	117238239	-	mm|12qF2	JF690500	chr12:117238298-117238239
A_51_P103396	6.9853506	P	7.5117226	P	0.694298519404892	    53622	Krt85	Mus musculus keratin 85 (Krt85)	 mRNA [NM_016879]	keratin 85	Mm.347934	101347055	chr15	101346996	-	mm|15qF2	NM_016879	chr15:101347055-101346996	GO:0005882|GO:0005198|GO:0045095	NM_016879
A_51_P103397	13.775358	P	14.115705	P	0.789851312340811	    22371	Vwf	Mus musculus Von Willebrand factor homolog (Vwf)	 mRNA [NM_011708]	Von Willebrand factor homolog	Mm.22339	125636610	chr6	125636551	+	mm|6qF3	NM_011708	chr6:125636551-125636610	GO:0033093|GO:0005515|GO:0005783|GO:0031589|GO:0005518|GO:0051087|GO:0005578|GO:0030168|GO:0005576|GO:0001890|GO:0002020|GO:0042803|GO:0031012|GO:0001889|GO:0007599|GO:0047485|GO:0001948|GO:0005178|GO:0019865|GO:0007596|GO:0051260|GO:0007155|GO:0009897	NM_011708
A_51_P103406	11.122035	P	11.519533	P	0.759173742541344	    22371	Vwf	Mus musculus Von Willebrand factor homolog (Vwf)	 mRNA [NM_011708]	Von Willebrand factor homolog	Mm.22339	125635917	chr6	125635858	+	mm|6qF3	NM_011708	chr6:125635858-125635917	GO:0033093|GO:0005515|GO:0005783|GO:0031589|GO:0005518|GO:0051087|GO:0005578|GO:0030168|GO:0005576|GO:0001890|GO:0002020|GO:0042803|GO:0031012|GO:0001889|GO:0007599|GO:0047485|GO:0001948|GO:0005178|GO:0019865|GO:0007596|GO:0051260|GO:0007155|GO:0009897	NM_011708
A_51_P103435	11.731429	P	11.586128	P	1.10596137404743	   212892	Rsph4a	Mus musculus radial spoke head 4 homolog A (Chlamydomonas) (Rsph4a)	 mRNA [NM_001162957]	radial spoke head 4 homolog A (Chlamydomonas)	Mm.131949	 33635305	chr10	 33635246	+	mm|10qB1	NM_001162957	chr10:33635246-33635305	GO:0005929|GO:0003674|GO:0035083|GO:0005737|GO:0003341|GO:0042995|GO:0005575|GO:0005856	NM_001162957
A_51_P103450	1.8888963	A	2.2725122	A	0.766514027973101	    74854	4930402F06Rik	Mus musculus RIKEN cDNA 4930402F06 gene (4930402F06Rik)	 mRNA [NM_001080709]	RIKEN cDNA 4930402F06 gene	Mm.159338	 35231492	chr2	 35231433	-	mm|2qB	NM_001080709	chr2:35231492-35231433	GO:0008150|GO:0003674|GO:0016757|GO:0005575|GO:0016740	NM_001080709
A_51_P103465	4.7179356	P	4.951802	P	0.850352902892378	   210094	Iglon5	Mus musculus IgLON family member 5 (Iglon5)	 mRNA [NM_001164518]	IgLON family member 5	Mm.228087	 50729357	chr7	 50729298	-	mm|7qB4	NM_001164518	chr7:50729357-50729298	GO:0008150|GO:0003674|GO:0005576|GO:0005575	NM_001164518
A_51_P103499	3.3366122	A	3.7000537	A	0.777308124166344	    66712	Spesp1	Mus musculus sperm equatorial segment protein 1 (Spesp1)	 mRNA [NM_025721]	sperm equatorial segment protein 1	Mm.263615	 62118732	chr9	 62118673	-	mm|9qB	NM_025721	chr9:62118732-62118673	GO:0008150|GO:0003674|GO:0007275|GO:0031410|GO:0005575	NM_025721
A_51_P103509	11.151035	P	11.3752575	P	0.856056248878095	    56368	Cyb561d2	Mus musculus cytochrome b-561 domain containing 2 (Cyb561d2)	 mRNA [NM_019720]	cytochrome b-561 domain containing 2	Mm.24833	107442126	chr9	107442067	-	mm|9qF1	NM_019720	chr9:107442126-107442067	GO:0008150|GO:0003674|GO:0016020|GO:0006810|GO:0016021|GO:0005575|GO:0022900|GO:0046872	NM_019720
A_51_P103533	8.288782	P	8.417479	P	0.914657168916048	   231876	Lmtk2	Mus musculus lemur tyrosine kinase 2 (Lmtk2)	 mRNA [NM_001081109]	lemur tyrosine kinase 2	Mm.288726	144947306	chr5	144947247	+	mm|5qG2	NM_001081109	chr5:144947247-144947306	GO:0048471|GO:0004864|GO:0032456|GO:0045022|GO:0070853|GO:0033572|GO:0005737|GO:0046777|GO:0001881|GO:0000166|GO:0018105|GO:0007411|GO:0016301|GO:0018107|GO:0048011|GO:0005794|GO:0005524|GO:0043086|GO:0007399|GO:0016310|GO:0004674|GO:0006468|GO:0016021|GO:0004713|GO:0055037|GO:0005769	NM_001081109
A_51_P103541	11.573454	P	12.142366	P	0.674124984183697	    12292	Cacna1s	Mus musculus calcium channel	 voltage-dependent	 L type	 alpha 1S subunit (Cacna1s)	 transcript variant 2	 mRNA [NM_001081023]	calcium channel	 voltage-dependent	 L type	 alpha 1S subunit	Mm.4418	138016079	chr1	138016020	+	mm|1qE4	NM_001081023	chr1:138016020-138016079	GO:0005886|GO:0006941|GO:0005737|GO:0006936|GO:0007528|GO:0043501|GO:0006810|GO:0006816|GO:0034765|GO:0051925|GO:0006811|GO:0005262|GO:0005244|GO:0005245|GO:0048741|GO:0008331|GO:0030315|GO:0007520|GO:0005891|GO:0001501|GO:0016529|GO:0007519|GO:0002074|GO:0070588|GO:0055001|GO:0016021|GO:0005216|GO:0007029|GO:0031674	NM_001081023
A_51_P103560	2.8397646	A	3.5978935	A	0.5912626704104	   637079	Gm16486	PREDICTED: Mus musculus predicted gene 16486 (Gm16486)	 mRNA [XM_912668]	predicted gene 16486	Mm.462671	 73241001	chr8	 73240942	+	mm|8qB3.3	XM_912668	chr8:73240942-73241001	GO:0005739|GO:0008150|GO:0003674	XM_912668
A_51_P103586	8.108116	P	7.892193	P	1.16144674114932	   320862	A730054J21Rik	Mus musculus 7 days neonate cerebellum cDNA	 RIKEN full-length enriched library	 clone:A730054J21 product:unclassifiable	 full insert sequence. [AK043086]	RIKEN cDNA A730054J21 gene	Mm.129727	180868742	chr1	180868683	+	mm|1qH4	AK043086	chr1:180868683-180868742	GO:0008150|GO:0003674|GO:0005575
A_51_P103594	4.5236135	P	5.0701547	P	0.684659604586812	    77296	Fam162b	Mus musculus family with sequence similarity 162	 member B (Fam162b)	 mRNA [NM_029894]	family with sequence similarity 162	 member B	Mm.30588	 51305336	chr10	 51305277	-	mm|10qB3	NM_029894	chr10:51305336-51305277	GO:0008150|GO:0003674|GO:0016020|GO:0016021|GO:0005575	NM_029894
A_51_P103617	4.561094	P	4.841486	P	0.823367266708706	   195564	Skint3	Mus musculus selection and upkeep of intraepithelial T cells 3 (Skint3)	 transcript variant 2	 mRNA [NM_177578]	selection and upkeep of intraepithelial T cells 3	Mm.259652	111972731	chr4	111972672	+	mm|4qD1	NM_177578	chr4:111972672-111972731	GO:0008150|GO:0003674|GO:0016020|GO:0016021|GO:0005575	NM_177578
A_51_P103650	13.176465	P	13.496131	P	0.801255355674163	    93679	Trim8	Mus musculus tripartite motif-containing 8 (Trim8)	 mRNA [NM_053100]	tripartite motif-containing 8	Mm.485016	 46590737	chr19	 46590678	+	mm|19qC3	NM_053100	chr19:46590678-46590737	GO:0005515|GO:0005737|GO:0016605|GO:0005634|GO:0046872|GO:0042803|GO:0043231	NM_053100
A_51_P103659	8.989917	P	8.64623	P	1.26899554113885	    22151	Tubb2a	Mus musculus tubulin	 beta 2A (Tubb2a)	 mRNA [NM_009450]	tubulin	 beta 2A	Mm.422827	 34168088	chr13	 34167380	-	mm|13qA3.3	NM_009450	chr13:34168088-34167380	GO:0006184|GO:0043234|GO:0051258|GO:0005737|GO:0000166|GO:0005198|GO:0005874|GO:0003924|GO:0007017|GO:0005856|GO:0005525|GO:0007018	NM_009450
A_51_P103706	3.829115	P	2.854638	A	1.96492874989913	    13095	Cyp2c29	Mus musculus cytochrome P450	 family 2	 subfamily c	 polypeptide 29 (Cyp2c29)	 mRNA [NM_007815]	cytochrome P450	 family 2	 subfamily c	 polypeptide 29	Mm.20764	 39403701	chr19	 39403642	+	mm|19qC3	NM_007815	chr19:39403642-39403701	GO:0005792|GO:0004497|GO:0016491|GO:0046872|GO:0055114	NM_007815
A_51_P103718	13.119133	P	13.048661	P	1.05006017085994	    27399	Ip6k1	Mus musculus inositol hexaphosphate kinase 1 (Ip6k1)	 mRNA [NM_013785]	inositol hexaphosphate kinase 1	Mm.276155	107950891	chr9	107950832	+	mm|9qF2	NM_013785	chr9:107950832-107950891	GO:0046854|GO:0016310|GO:0008440|GO:0006020|GO:0005737|GO:0000166|GO:0016301|GO:0005634|GO:0005524|GO:0000832|GO:0016740|GO:0004428	NM_013785
A_51_P103745	8.483319	P	6.796306	P	3.21989356453566	    13483	Dpp6	Mus musculus dipeptidylpeptidase 6 (Dpp6)	 transcript variant 2	 mRNA [NM_010075]	dipeptidylpeptidase 6	Mm.42078	 28052903	chr5	 28052844	+	mm|5qB1	NM_010075	chr5:28052844-28052903	GO:0008150|GO:0003674|GO:0016020|GO:0006508|GO:0008236|GO:0016021|GO:0005575	NM_010075
A_51_P103757	12.921	P	12.923082	P	0.99855790838494	    67773	Myst1	Mus musculus MYST histone acetyltransferase 1 (Myst1)	 mRNA [NM_026370]	MYST histone acetyltransferase 1	Mm.425492	135069238	chr7	135069179	+	mm|7qF3	NM_026370	chr7:135069179-135069238	GO:0006355|GO:0016747|GO:0016573|GO:0005634|GO:0035064|GO:0046872|GO:0006351|GO:0043984|GO:0071339|GO:0008152|GO:0072487|GO:0030099|GO:0000776|GO:0016407|GO:0045893|GO:0019899|GO:0045892|GO:0004402|GO:0016740|GO:0008134|GO:0008415|GO:0016568	NM_026370
A_51_P103780	12.808309	P	12.936089	P	0.915238724418123	   108735	Sft2d2	Mus musculus SFT2 domain containing 2 (Sft2d2)	 mRNA [NM_145512]	SFT2 domain containing 2	Mm.288369	167104788	chr1	167104729	-	mm|1qH2.3	NM_145512	chr1:167104788-167104729	GO:0008150|GO:0003674|GO:0016020|GO:0006810|GO:0016021|GO:0005575|GO:0016192|GO:0015031	NM_145512
A_51_P103819	8.908276	P	9.37986	P	0.721172355243206	   217410	Trib2	Mus musculus tribbles homolog 2 (Drosophila) (Trib2)	 mRNA [NM_144551]	tribbles homolog 2 (Drosophila)	Mm.485040	 15800061	chr12	 15800004	-	mm|12qA1.1	NM_144551	chr12:15800061-15800004	GO:0005515|GO:0045599|GO:0032436|GO:0005634|GO:0005524|GO:0043086|GO:0043433|GO:0005737|GO:0004672|GO:0004860|GO:0055106|GO:0051443|GO:0006468|GO:0045081|GO:0005856|GO:0031625|GO:0008134|GO:0016772	NM_144551
A_51_P103850	5.055462	P	5.4278636	P	0.772495481764401	    14119	Fbn2	Mus musculus fibrillin 2 (Fbn2)	 mRNA [NM_010181]	fibrillin 2	Mm.20271	 58172031	chr18	 58171972	-	mm|18qD3	NM_010181	chr18:58172031-58171972	GO:0005509|GO:0001527|GO:0005576|GO:0030326|GO:0035108	NM_010181
A_51_P103865	9.237217	P	9.246812	P	0.993371320073288	    69871	2010007H12Rik	Mus musculus RIKEN cDNA 2010007H12 gene (2010007H12Rik)	 mRNA [NM_027242]	RIKEN cDNA 2010007H12 gene	Mm.276058	138221281	chr5	138221222	+	mm|5qG2	NM_027242	chr5:138221222-138221281	GO:0008150|GO:0003674|GO:0005575	NM_027242
A_51_P103890	2.929902	A	2.5490766	A	1.30208659695871	   545156	Kalrn	Mus musculus adult male corpora quadrigemina cDNA	 RIKEN full-length enriched library	 clone:B230112L11 product:hypothetical protein	 full insert sequence. [AK045394]	kalirin	 RhoGEF kinase	Mm.82274	 34234920	chr16	 34234861	-	mm|16qB3	AK045394	chr16:34234920-34234861	GO:0008624|GO:0043005|GO:0048471|GO:0035023|GO:0007409|GO:0046872|GO:0005829|GO:0005622|GO:0005085|GO:0035556|GO:0005737|GO:0000166|GO:0016301|GO:0043025|GO:0005856|GO:0005089|GO:0016772|GO:0006915|GO:0005524|GO:0007399|GO:0016310|GO:0004672|GO:0004674|GO:0050773|GO:0006468|GO:0016740
A_51_P103912	3.179268	A	3.1626291	A	1.01159997047033	    17203	Mc5r	Mus musculus melanocortin 5 receptor (Mc5r)	 mRNA [NM_013596]	melanocortin 5 receptor	Mm.8003	 68498709	chr18	 68498650	+	mm|18qE2	NM_013596	chr18:68498650-68498709	GO:0007165|GO:0016020|GO:0007186|GO:0005886|GO:0004930|GO:0042562|GO:0030819|GO:0004872|GO:0016021|GO:0004871|GO:0004977	NM_013596
A_51_P103929	7.610391	P	8.944153	P	0.396732364750351	    17295	Met	Mus musculus met proto-oncogene (Met)	 mRNA [NM_008591]	met proto-oncogene	Mm.86844	 17503358	chr6	 17503299	+	mm|6qA2	NM_008591	chr6:17503299-17503358	GO:0008013|GO:0005615|GO:0032403|GO:0019861|GO:0046777|GO:0009925|GO:0000166|GO:0016301|GO:0043274|GO:0045211|GO:0043025|GO:0030534|GO:0010800|GO:0014902|GO:0046982|GO:0045740|GO:0014069|GO:0045840|GO:0000122|GO:0001890|GO:0060076|GO:0010801|GO:0001889|GO:0016310|GO:0007517|GO:0007519|GO:0007420|GO:0050775|GO:0010976|GO:0051450|GO:0043548|GO:0043005|GO:0014812|GO:0005886|GO:0030425|GO:0000187|GO:0005737|GO:0033138|GO:0060665|GO:0045944|GO:0004872|GO:0005008|GO:0048012|GO:0005624|GO:0030317|GO:0042593|GO:0005524|GO:0010828|GO:0010628|GO:0007165|GO:0004672|GO:0016020|GO:0004713|GO:0016021|GO:0001764|GO:0016740	NM_008591
A_51_P103945	10.195639	P	11.7765255	P	0.334276421079963	NA		predicted gene	 16948 [Source:MGI Symbol;Acc:MGI:4439872] [ENSMUST00000103445]		Mm.439101	114849475	chr12	114849416	-	mm|12qF1	D17387	chr12:114849475-114849416
A_51_P103975	13.309641	P	13.20056	P	1.07854098459362	    70456	Brp44	Mus musculus brain protein 44 (Brp44)	 mRNA [NM_027430]	brain protein 44	Mm.195625	167411082	chr1	167409699	+	mm|1qH2.3	NM_027430	chr1:167409699-167411082	GO:0005739|GO:0008150|GO:0003674	NM_027430
A_51_P104006	7.5199184	P	8.186741	P	0.629892439500930	    19131	Prh1	Mus musculus proline rich protein HaeIII subfamily 1 (Prh1)	 mRNA [NM_011174]	proline rich protein HaeIII subfamily 1	Mm.425348	132521750	chr6	132521691	+	mm|6qG1	NM_011174	chr6:132521691-132521750		NM_011174
A_51_P104012	14.946061	P	15.050495	P	0.930169796466187	    72309	Tmem158	Mus musculus transmembrane protein 158 (Tmem158)	 mRNA [NM_001002267]	transmembrane protein 158	Mm.8569	123168286	chr9	123168227	-	mm|9qF4	NM_001002267	chr9:123168286-123168227	GO:0042277|GO:0008150|GO:0016021|GO:0005575	NM_001002267
A_51_P104077	5.663718	P	5.908532	P	0.843924592411608	    72607	Usp13	Mus musculus ubiquitin specific peptidase 13 (isopeptidase T-3) (Usp13)	 mRNA [NM_001013024]	ubiquitin specific peptidase 13 (isopeptidase T-3)	Mm.316153	 32833889	chr3	 32833830	+	mm|3qA3	NM_001013024	chr3:32833830-32833889	GO:0008150|GO:0003674|GO:0016787|GO:0008233|GO:0008234|GO:0005575|GO:0004221|GO:0046872	NM_001013024
A_51_P104125	11.53281	P	11.4051	P	1.09255809899235	    72826	Fam76b	Mus musculus family with sequence similarity 76	 member B (Fam76b)	 mRNA [NM_176836]	family with sequence similarity 76	 member B	Mm.246174	 13650717	chr9	 13650658	+	mm|9qA1	NM_176836	chr9:13650658-13650717	GO:0008150|GO:0003674|GO:0005575	NM_176836
A_51_P104128	15.700733	P	15.426769	P	1.20912550378730	    18245	Oaz1	Mus musculus 18-day embryo whole body cDNA	 RIKEN full-length enriched library	 clone:1110005A09 product:ornithine decarboxylase antizyme	 full insert sequence. [AK003452]	ornithine decarboxylase antizyme 1	Mm.398119	 80291658	chr10	 80291599	+	mm|10qC1	AK003452	chr10:80291599-80291658	GO:0005515|GO:0004857|GO:0008073|GO:0006595|GO:0043086
A_51_P104162	8.039579	P	8.630965	P	0.663704977972845	   328232	Gfod1	Mus musculus 0 day neonate eyeball cDNA	 RIKEN full-length enriched library	 clone:E130012P04 product:CDNA FLJ20330 FIS	 CLONE HEP10296 homolog [Homo sapiens]	 full insert sequence. [AK053379]	glucose-fructose oxidoreductase domain containing 1	Mm.441399	 43360958	chr13	 43360899	-	mm|13qA4	AK053379	chr13:43360958-43360899	GO:0008150|GO:0003674|GO:0005488|GO:0008152|GO:0016491|GO:0005576|GO:0005575|GO:0055114
A_51_P104172	3.728701	A	2.7322154	A	1.99513393636046	   243833	Zfp128	Mus musculus zinc finger protein 128 (Zfp128)	 mRNA [NM_153802]	zinc finger protein 128	Mm.293823	 13477655	chr7	 13477596	+	mm|7qA1	NM_153802	chr7:13477596-13477655	GO:0005515|GO:0005634|GO:0030509|GO:0000122|GO:0046872	NM_153802
A_51_P104187	15.056934	P	14.963946	P	1.06657690925754	    22218	Sumo1	Mus musculus SMT3 suppressor of mif two 3 homolog 1 (yeast) (Sumo1)	 mRNA [NM_009460]	SMT3 suppressor of mif two 3 homolog 1 (yeast)	Mm.362118	 59696358	chr1	 59696299	-	mm|1qC1.3	NM_009460	chr1:59696358-59696299	GO:0005515|GO:0006355|GO:0016925|GO:0032436|GO:0006950|GO:0045202|GO:0005634|GO:0043433|GO:0030425|GO:0043392|GO:0005737|GO:0031334|GO:0016020|GO:0016605|GO:0019789|GO:0045892|GO:0031625|GO:0008134	NM_009460
A_51_P104197	11.828071	P	9.613539	P	4.64130980544715	   244757	Glb1l2	Mus musculus galactosidase	 beta 1-like 2 (Glb1l2)	 mRNA [NM_153803]	galactosidase	 beta 1-like 2	Mm.293696	 26571433	chr9	 26571374	-	mm|9qA4	NM_153803	chr9:26571433-26571374	GO:0008150|GO:0003674|GO:0004565|GO:0016787|GO:0043169|GO:0005975|GO:0016798|GO:0008152|GO:0005576|GO:0005575|GO:0003824|GO:0004553	NM_153803
A_51_P104241	5.989684	P	6.4527383	P	0.725448799039763	    22673	Zfp185	Mus musculus zinc finger protein 185 (Zfp185)	 transcript variant 1	 mRNA [NM_009549]	zinc finger protein 185	Mm.1161	 70275417	chrX	 70275358	+	mm|XqA7.3	NM_009549	chrX:70275358-70275417	GO:0005737|GO:0030054|GO:0008270|GO:0005856|GO:0046872	NM_009549
A_51_P104255	2.304701	A	2.3146348	A	0.993138065865785	   625026	Gm10048	Mus musculus adult female vagina cDNA	 RIKEN full-length enriched library	 clone:9930013C11 product:hypothetical protein	 full insert sequence. [AK036806]	predicted gene 10048		 49316489	chr5	 49316430	-	mm|5qB3	AK036806	chr5:49316489-49316430
A_51_P104258	1.9647677	A	1.9620907	A	1.00185727760984	   258641	Olfr1154	Mus musculus olfactory receptor 1154 (Olfr1154)	 mRNA [NM_146647]	olfactory receptor 1154	Mm.377608	 87743105	chr2	 87743046	-	mm|2qD	NM_146647	chr2:87743105-87743046	GO:0007608|GO:0007165|GO:0004984|GO:0007186|GO:0004930|GO:0004872|GO:0016021|GO:0004871	NM_146647
A_51_P104274	2.7209752	A	2.8689706	A	0.902503605069857	    66084	Rmnd1	Mus musculus 15 days embryo male testis cDNA	 RIKEN full-length enriched library	 clone:8030487M07 product:unclassifiable	 full insert sequence. [AK033298]	required for meiotic nuclear division 1 homolog (S. cerevisiae)		  5942540	chr10	  5942481	-	mm|10qA1	AK033298	chr10:5942540-5942481	GO:0005739|GO:0008150|GO:0003674
A_51_P104290	3.11519	A	4.0460114	A	0.524559598193442	    56543	Kcnd3	Mus musculus potassium voltage-gated channel	 Shal-related family	 member 3 (Kcnd3)	 transcript variant 2	 mRNA [NM_019931]	potassium voltage-gated channel	 Shal-related family	 member 3	Mm.44530	105471019	chr3	105469899	+	mm|3qF2.2	NM_019931	chr3:105469899-105471019	GO:0043005|GO:0005250|GO:0005244|GO:0005886|GO:0005267|GO:0055085|GO:0046872|GO:0016020|GO:0005887|GO:0005249|GO:0008076|GO:0043025|GO:0006810|GO:0034765|GO:0016021|GO:0005216|GO:0006813|GO:0071805|GO:0006811	NM_019931
A_51_P104348	9.668076	P	11.681171	P	0.247741076781151	NA		immunoglobulin kappa variable 6-20 [Source:MGI Symbol;Acc:MGI:1330836] [ENSMUST00000103388]		Mm.300786	 70286042	chr6	 70285983	-	mm|6qC1	M15046	chr6:70286042-70285983
A_51_P104361	2.2470896	A	2.3348994	A	0.940950150999662	NA		Mus musculus adult male testis cDNA	 RIKEN full-length enriched library	 clone:4930420A11 product:unclassifiable	 full insert sequence. [AK076715]		Mm.399138	 79101983	chr7	 79101726	-	mm|7qD1	AK076715	chr7:79101983-79101726
A_51_P104392	2.503942	A	2.2636373	A	1.18124211571943	   102614	Rpp25	Mus musculus ribonuclease P 25 subunit (human) (Rpp25)	 mRNA [NM_133982]	ribonuclease P 25 subunit (human)	Mm.274421	 57353085	chr9	 57353026	+	mm|9qB	NM_133982	chr9:57353026-57353085	GO:0008150|GO:0003674|GO:0016787|GO:0004526|GO:0003723|GO:0005634|GO:0005575|GO:0003676|GO:0008033	NM_133982
A_51_P104409	4.6208835	P	4.413751	P	1.15439143426812	    75718	Vwa5b1	Mus musculus von Willebrand factor A domain containing 5B1 (Vwa5b1)	 mRNA [NM_029401]	von Willebrand factor A domain containing 5B1	Mm.251530	138125105	chr4	138125046	-	mm|4qD3	NM_029401	chr4:138125105-138125046	GO:0008150|GO:0003674|GO:0005576|GO:0005575	NM_029401
A_51_P104418	6.7048697	P	7.3729625	P	0.629338103869512	    63953	Dusp10	Mus musculus dual specificity phosphatase 10 (Dusp10)	 mRNA [NM_022019]	dual specificity phosphatase 10	Mm.404024	185898667	chr1	185898608	+	mm|1qH5	NM_022019	chr1:185898608-185898667	GO:0005794|GO:0005634|GO:0060266|GO:0032873|GO:0000188|GO:0002819|GO:0005737|GO:0006470|GO:0046329|GO:0016787|GO:0045088|GO:0032496|GO:0043508|GO:0017017	NM_022019
A_51_P104430	6.436686	P	5.2250566	P	2.315990603504	   107528	Magee1	Mus musculus melanoma antigen	 family E	 1 (Magee1)	 mRNA [NM_053201]	melanoma antigen	 family E	 1	Mm.24341	102318186	chrX	102318127	+	mm|XqD	NM_053201	chrX:102318127-102318186	GO:0005515|GO:0008150|GO:0048471|GO:0005737|GO:0016020|GO:0016010|GO:0005886|GO:0045211|GO:0005634|GO:0030425	NM_053201
A_51_P104456	11.62447	P	12.126173	P	0.706272583829896	    64934	Pes1	Mus musculus pescadillo homolog 1	 containing BRCT domain (zebrafish) (Pes1)	 mRNA [NM_022889]	pescadillo homolog 1	 containing BRCT domain (zebrafish)	Mm.28659	  3878978	chr11	  3878919	+	mm|11qA1	NM_022889	chr11:3878919-3878978	GO:0000463|GO:0000793|GO:0005694|GO:0008283|GO:0042254|GO:0006364|GO:0005730|GO:0005634|GO:0070545|GO:0005622|GO:0007000|GO:0003674|GO:0000089|GO:0051726|GO:0005654|GO:0030687|GO:0000466	NM_022889
A_51_P104478	3.1501727	A	6.934621	P	0.0725717414521399	    66106	Smpx	Mus musculus small muscle protein	 X-linked (Smpx)	 mRNA [NM_025357]	small muscle protein	 X-linked	Mm.140340	154190429	chrX	154190370	+	mm|XqF4	NM_025357	chrX:154190370-154190429	GO:0005737|GO:0043292|GO:0043034|GO:0005634|GO:0031430|GO:0005927	NM_025357
A_51_P104487	3.3901248	A	4.201404	P	0.569876339391098	    11438	Chrna4	Mus musculus cholinergic receptor	 nicotinic	 alpha polypeptide 4 (Chrna4)	 mRNA [NM_015730]	cholinergic receptor	 nicotinic	 alpha polypeptide 4	Mm.252369	180759487	chr2	180759428	-	mm|2qH4	NM_015730	chr2:180759487-180759428	GO:0005515|GO:0005230|GO:0051899|GO:0030054|GO:0005886|GO:0045202|GO:0030425|GO:0014059|GO:0034220|GO:0045211|GO:0015464|GO:0042391|GO:0043025|GO:0042166|GO:0006810|GO:0007610|GO:0004872|GO:0006816|GO:0007626|GO:0006979|GO:0006812|GO:0006811|GO:0001666|GO:0005624|GO:0019233|GO:0005892|GO:0007271|GO:0035095|GO:0042113|GO:0007165|GO:0060080|GO:0006281|GO:0050890|GO:0016020|GO:0050877|GO:0001508|GO:0016021|GO:0005216|GO:0004889|GO:0009897|GO:0035094	NM_015730
A_51_P104527	10.951711	P	11.1786995	P	0.854416551581461	   235610	Atrip	Mus musculus ATR interacting protein (Atrip)	 mRNA [NM_172774]	ATR interacting protein	Mm.100622	108962402	chr9	108962343	-	mm|9qF2	NM_172774	chr9:108962402-108962343	GO:0006260|GO:0006281|GO:0004674|GO:0005654|GO:0005634|GO:0006974	NM_172774
A_51_P104565	1.895078	A	1.9001201	A	0.996511182716176	NA		Mus musculus 16 days embryo head cDNA	 RIKEN full-length enriched library	 clone:C130019H05 product:unclassifiable	 full insert sequence. [AK081463]		Mm.447561	 41488922	chr12	 41488863	+	mm|12qB1	AK081463	chr12:41488863-41488922
A_51_P104569	2.3142202	A	3.153689	A	0.558849299349224	   258498	Olfr148	Mus musculus olfactory receptor 148 (Olfr148)	 mRNA [NM_146505]	olfactory receptor 148	Mm.377537	 39421680	chr9	 39421621	+	mm|9qA5.1	NM_146505	chr9:39421621-39421680	GO:0007608|GO:0007165|GO:0004984|GO:0016020|GO:0007186|GO:0005886|GO:0004930|GO:0004872|GO:0016021|GO:0004871|GO:0050896	NM_146505
A_51_P104596	10.799808	P	10.8142605	P	0.990032300491114	    11736	Ankfy1	Mus musculus ankyrin repeat and FYVE domain containing 1 (Ankfy1)	 mRNA [NM_009671]	ankyrin repeat and FYVE domain containing 1	Mm.10313	 72584774	chr11	 72584353	+	mm|11qB4	NM_009671	chr11:72584353-72584774	GO:0046872|GO:0043231	NM_009671
A_51_P104608	8.8957815	P	10.288707	P	0.380791848305412	    78416	Rnase6	Mus musculus ribonuclease	 RNase A family	 6 (Rnase6)	 mRNA [NM_030098]	ribonuclease	 RNase A family	 6	Mm.103835	 51750631	chr14	 51750572	+	mm|14qC1	NM_030098	chr14:51750572-51750631	GO:0008150|GO:0003674|GO:0004518|GO:0004519|GO:0016787|GO:0004522|GO:0005575|GO:0003676	NM_030098
A_51_P104670	11.917374	P	12.20714	P	0.81803473011929	    12181	Bop1	Mus musculus block of proliferation 1 (Bop1)	 mRNA [NM_013481]	block of proliferation 1	Mm.4283	 76283651	chr15	 76283592	-	mm|15qD3	NM_013481	chr15:76283651-76283592	GO:0005515|GO:0000463|GO:0008283|GO:0006364|GO:0042254|GO:0005730|GO:0005634|GO:0070545|GO:0030529|GO:0043021|GO:0051726|GO:0042273|GO:0000448	NM_013481
A_51_P104681	1.8875659	A	1.8792715	A	1.00576579857249	    68484	Krtap16-8	Mus musculus keratin associated protein 16-8 (Krtap16-8)	 mRNA [NM_130856]	keratin associated protein 16-8	Mm.46209	 89047752	chr16	 89047693	-	mm|16qC3.3	NM_130856	chr16:89047752-89047693	GO:0005882|GO:0008150|GO:0003674|GO:0005575	NM_130856
A_51_P104687	4.2928047	P	3.9780257	P	1.24382110331301	    14599	Gh	Mus musculus growth hormone (Gh)	 mRNA [NM_008117]	growth hormone	Mm.343934	106162735	chr11	106162492	-	mm|11qE1	NM_008117	chr11:106162735-106162492	GO:0005802|GO:0005886|GO:0005131|GO:0050731|GO:0042523|GO:0033143|GO:0060396|GO:0005634|GO:0005615|GO:0032094|GO:0046872|GO:0007405|GO:0005829|GO:0005739|GO:0015758|GO:0050769|GO:0090031|GO:0009416|GO:0040018|GO:0043526|GO:0030141|GO:0032355|GO:0045927|GO:0010535|GO:0032869|GO:0005148|GO:0048286|GO:0042517|GO:0005576|GO:0014068|GO:0007259|GO:0046427|GO:0007165|GO:0005179|GO:0043568|GO:0008083	NM_008117
A_51_P104710	7.920417	P	7.944539	P	0.98341890871655	   243369	Sspo	Mus musculus SCO-spondin (Sspo)	 mRNA [NM_173428]	SCO-spondin	Mm.25039	 48448382	chr6	 48448197	+	mm|6qB2.3	NM_173428	chr6:48448197-48448382	GO:0008150|GO:0003674|GO:0005737	NM_173428
A_51_P104718	2.354155	A	2.7548394	A	0.757498848179902	    14738	Gpr12	Mus musculus G-protein coupled receptor 12 (Gpr12)	 transcript variant 1	 mRNA [NM_001010941]	G-protein coupled receptor 12	Mm.153539	147394579	chr5	147394520	-	mm|5qG3	NM_001010941	chr5:147394579-147394520	GO:0007165|GO:0016020|GO:0007186|GO:0005886|GO:0001619|GO:0004930|GO:0006874|GO:0004872|GO:0016021|GO:0004871	NM_001010941
A_51_P104722	3.5319648	A	3.0498762	A	1.39676430909679	    14738	Gpr12	Mus musculus G-protein coupled receptor 12 (Gpr12)	 transcript variant 1	 mRNA [NM_001010941]	G-protein coupled receptor 12	Mm.153539	147394619	chr5	147394560	-	mm|5qG3	NM_001010941	chr5:147394619-147394560	GO:0007165|GO:0016020|GO:0007186|GO:0005886|GO:0001619|GO:0004930|GO:0006874|GO:0004872|GO:0016021|GO:0004871	NM_001010941
A_51_P104727	11.638741	P	11.129495	P	1.42330613446040	   216565	Ehbp1	Mus musculus EH domain binding protein 1 (Ehbp1)	 mRNA [NM_153078]	EH domain binding protein 1	Mm.281732	 21905966	chr11	 21905907	-	mm|11qA3.2	NM_153078	chr11:21905966-21905907	GO:0005515|GO:0008150|GO:0005737|GO:0016020|GO:0005575	NM_153078
A_51_P104747	11.289466	P	11.281031	P	1.00586382175700	    14885	Gtf2h4	Mus musculus general transcription factor II H	 polypeptide 4 (Gtf2h4)	 mRNA [NM_010364]	general transcription factor II H	 polypeptide 4	Mm.10182	 35805393	chr17	 35804909	-	mm|17qB1	NM_010364	chr17:35805393-35804909	GO:0006368|GO:0006355|GO:0006367|GO:0006281|GO:0006366|GO:0006468|GO:0005654|GO:0005634|GO:0000718|GO:0005675|GO:0006974|GO:0006351	NM_010364
A_51_P104757	7.480784	P	8.137227	P	0.634440599101002	    15161	Hcfc1	Mus musculus host cell factor C1 (Hcfc1)	 mRNA [NM_008224]	host cell factor C1	Mm.485413	 71190489	chrX	 71190007	-	mm|XqA7.3	NM_008224	chrX:71190489-71190007	GO:0006355|GO:0003713|GO:0050821|GO:0005634|GO:0042802|GO:0005739|GO:0010628|GO:0005737|GO:0007049|GO:0019046|GO:0070688|GO:0071339|GO:0003682|GO:0048188|GO:0043254	NM_008224
A_51_P104768	12.10729	P	13.502764	P	0.380119778768063	NA		immunoglobulin heavy variable V1-9 [Source:MGI Symbol;Acc:MGI:4439621] [ENSMUST00000103498]		Mm.423002	115822028	chr12	115821969	-	mm|12qF2	AF021865	chr12:115822028-115821969
A_51_P104783	4.0259314	P	4.1866755	P	0.894563562142468	    83434	Rsph6a	Mus musculus radial spoke head 6 homolog A (Chlamydomonas) (Rsph6a)	 transcript variant 1	 mRNA [NM_031255]	radial spoke head 6 homolog A (Chlamydomonas)	Mm.84435	 19659483	chr7	 19659424	+	mm|7qA3	NM_031255	chr7:19659424-19659483	GO:0005622|GO:0008150|GO:0005929|GO:0003674	NM_031255
A_51_P104786	2.6610756	A	2.4614496	A	1.14840060842442	    83434	Rsph6a	Mus musculus radial spoke head 6 homolog A (Chlamydomonas) (Rsph6a)	 transcript variant 1	 mRNA [NM_031255]	radial spoke head 6 homolog A (Chlamydomonas)	Mm.84435	 19659422	chr7	 19653477	+	mm|7qA3	NM_031255	chr7:19653477-19659422	GO:0005622|GO:0008150|GO:0005929|GO:0003674	NM_031255
A_51_P104802	9.289013	P	4.0151434	A	38.6894844656995	   235402	Lingo1	Mus musculus leucine rich repeat and Ig domain containing 1 (Lingo1)	 mRNA [NM_181074]	leucine rich repeat and Ig domain containing 1	Mm.246605	 56467360	chr9	 56467301	-	mm|9qB	NM_181074	chr9:56467360-56467301	GO:0005515|GO:0005154|GO:0016020|GO:0005886|GO:0048715|GO:0043491|GO:0021954|GO:0050771|GO:0016021|GO:0050770|GO:0031175	NM_181074
A_51_P104861	10.136991	P	10.120578	P	1.01144158457678	   103806	Maml1	Mus musculus mastermind like 1 (Drosophila) (Maml1)	 mRNA [NM_175334]	mastermind like 1 (Drosophila)	Mm.51116	 50069401	chr11	 50069342	-	mm|11qB1.3	NM_175334	chr11:50069401-50069342	GO:0006355|GO:0019901|GO:0016607|GO:0007219|GO:0045944|GO:0042605|GO:0003713|GO:0005634|GO:0006351	NM_175334
A_51_P104891	11.2062845	P	10.94479	P	1.19871982567424	    28042	Ept1	Mus musculus ethanolaminephosphotransferase 1 (CDP-ethanolamine-specific) (Ept1)	 mRNA [NM_027652]	ethanolaminephosphotransferase 1 (CDP-ethanolamine-specific)	Mm.168854	 30598786	chr5	 30598727	+	mm|5qB1	NM_027652	chr5:30598727-30598786	GO:0008150|GO:0003674|GO:0016780|GO:0016020|GO:0004307|GO:0016021|GO:0008654|GO:0005575|GO:0046872|GO:0016740	NM_027652
A_51_P104897	13.83525	P	14.502112	P	0.629875237373987	    16440	Itpr3	Mus musculus inositol 1	4	5-triphosphate receptor 3 (Itpr3)	 mRNA [NM_080553]	inositol 1	4	5-triphosphate receptor 3	Mm.458106	 27259161	chr17	 27259102	+	mm|17qA3.3	NM_080553	chr17:27259102-27259161	GO:0005515|GO:0060402|GO:0005783|GO:0005634|GO:0051291|GO:0007204|GO:0005640|GO:0070679|GO:0005737|GO:0043209|GO:0043025|GO:0006810|GO:0051260|GO:0004872|GO:0006816|GO:0031095|GO:0006811|GO:0005792|GO:0005262|GO:0005220|GO:0048016|GO:0005730|GO:0055085|GO:0050916|GO:0050917|GO:0000822|GO:0051592|GO:0043533|GO:0050913|GO:0007186|GO:0016020|GO:0005887|GO:0070588|GO:0005789|GO:0005654|GO:0016021|GO:0035091|GO:0005216|GO:0005218	NM_080553
A_51_P104933	14.694778	P	14.349441	P	1.27044771252402	   227682	Trub2	Mus musculus TruB pseudouridine (psi) synthase homolog 2 (E. coli) (Trub2)	 transcript variant 1	 mRNA [NM_145520]	TruB pseudouridine (psi) synthase homolog 2 (E. coli)	Mm.245739	 29632188	chr2	 29632129	-	mm|2qB	NM_145520	chr2:29632188-29632129	GO:0009982|GO:0008150|GO:0006396|GO:0003674|GO:0003723|GO:0009451|GO:0005575|GO:0016853|GO:0001522|GO:0008033	NM_145520
A_51_P104939	3.761652	A	4.649672	P	0.540355210053946	    16636	Klra5	Mus musculus killer cell lectin-like receptor	 subfamily A	 member 5 (Klra5)	 mRNA [NM_008463]	killer cell lectin-like receptor	 subfamily A	 member 5	Mm.14111	129849188	chr6	129849129	-	mm|6qF3	NM_008463	chr6:129849188-129849129	GO:0016020|GO:0005886|GO:0005488|GO:0005529|GO:0004872|GO:0016021|GO:0007155	NM_008463
A_51_P104953	8.051173	P	7.763732	P	1.22047352505036	    71389	Chd6	Mus musculus chromodomain helicase DNA binding protein 6 (Chd6)	 mRNA [NM_173368]	chromodomain helicase DNA binding protein 6	Mm.122738	160774536	chr2	160774477	-	mm|2qH2	NM_173368	chr2:160774536-160774477	GO:0004386|GO:0005634	NM_173368
A_51_P104960	13.73677	P	13.602356	P	1.09764687635597	    19179	Psmc1	Mus musculus protease (prosome	 macropain) 26S subunit	 ATPase 1 (Psmc1)	 mRNA [NM_008947]	protease (prosome	 macropain) 26S subunit	 ATPase 1	Mm.157105	101361329	chr12	101361270	+	mm|12qE	NM_008947	chr12:101361270-101361329	GO:0030163|GO:0017111|GO:0005737|GO:0000502|GO:0016787|GO:0000166|GO:0051437|GO:0005634|GO:0051436|GO:0031145|GO:0005524	NM_008947
A_51_P104977	3.1981387	A	3.3281708	A	0.913811117683448	NA					 91726471	chr7	 91726411	+	mm|7qD3		chr7:091726411-091726471
A_51_P105000	9.6843605	P	1.9712245	A	209.838559687692	   258019	Olfr212	Mus musculus olfactory receptor 212 (Olfr212)	 mRNA [NM_001011800]	olfactory receptor 212	Mm.67253	116467149	chr6	116467090	+	mm|6qE3	NM_001011800	chr6:116467090-116467149	GO:0007608|GO:0004984|GO:0007186|GO:0004872|GO:0016021	NM_001011800
A_51_P105017	9.183312	P	9.417536	P	0.850142152521903	    19365	Rad52	Mus musculus RAD52 homolog (S. cerevisiae) (Rad52)	 transcript variant 4	 mRNA [NM_011236]	RAD52 homolog (S. cerevisiae)	Mm.149	119872598	chr6	119872539	+	mm|6qF1	NM_011236	chr6:119872539-119872598	GO:0006281|GO:0000724|GO:0006310|GO:0005654|GO:0005634|GO:0006974	NM_011236
A_51_P105068	10.534602	P	10.976422	P	0.736205279104627	    71897	Lypd6b	Mus musculus LY6/PLAUR domain containing 6B (Lypd6b)	 mRNA [NM_027990]	LY6/PLAUR domain containing 6B	Mm.41381	 49804250	chr2	 49804191	+	mm|2qC1.1	NM_027990	chr2:49804191-49804250	GO:0008150|GO:0003674|GO:0016020|GO:0005886|GO:0031225|GO:0005575	NM_027990
A_51_P105078	15.611231	P	15.962971	P	0.78363840017875	    20198	S100a4	Mus musculus S100 calcium binding protein A4 (S100a4)	 mRNA [NM_011311]	S100 calcium binding protein A4	Mm.3925	 90409902	chr3	 90409842	+	mm|3qF1	NM_011311	chr3:90409842-90409902	GO:0005515|GO:0043005|GO:0048471|GO:0050786|GO:0005509|GO:0005634|GO:0043123|GO:0048306|GO:0042802	NM_011311
A_51_P105124	11.806981	P	11.751203	P	1.03941947837747	   233571	P2ry6	Mus musculus pyrimidinergic receptor P2Y	 G-protein coupled	 6 (P2ry6)	 mRNA [NM_183168]	pyrimidinergic receptor P2Y	 G-protein coupled	 6	Mm.235193	108086208	chr7	108086149	-	mm|7qE3	NM_183168	chr7:108086208-108086149	GO:0030321|GO:0005886|GO:0004930|GO:0014911|GO:0007165|GO:0016323|GO:0045029|GO:0016324|GO:0019103|GO:0007186|GO:0016020|GO:0045028|GO:0004872|GO:0035589|GO:0004871|GO:0016021	NM_183168
A_51_P105161	3.651638	A	3.3165956	A	1.26141448055225	    74020	Cpne4	Mus musculus copine IV (Cpne4)	 mRNA [NM_028719]	copine IV	Mm.326240	104936376	chr9	104936317	+	mm|9qF1	NM_028719	chr9:104936317-104936376	GO:0008150|GO:0003674|GO:0005575	NM_028719
A_51_P105178	9.494987	P	10.06865	P	0.671908646074553	    20677	Sox4	Mus musculus SRY-box containing gene 4 (Sox4)	 mRNA [NM_009238]	SRY-box containing gene 4	Mm.240627	 29044125	chr13	 29044066	-	mm|13qA3.1	NM_009238	chr13:29044125-29044066	GO:0008284|GO:0008285|GO:0003700|GO:0005634|GO:0005739|GO:0046826|GO:0005737|GO:0031647|GO:0042769|GO:0045944|GO:0001046|GO:0031397|GO:0035019|GO:0006977|GO:0001666|GO:0006355|GO:0043066|GO:0043065|GO:0050821|GO:0045727|GO:0003677|GO:0006351|GO:0031018|GO:0001071|GO:2000761|GO:0045893	NM_009238
A_51_P105241	5.7172403	P	5.6021843	P	1.08301708336336	    74356	4931428F04Rik	Mus musculus RIKEN cDNA 4931428F04 gene (4931428F04Rik)	 transcript variant 1	 mRNA [NM_028888]	RIKEN cDNA 4931428F04 gene	Mm.204876	107806014	chr8	107805956	-	mm|8qD3	NM_028888	chr8:107806014-107805956	GO:0008150|GO:0003674|GO:0005575	NM_028888
A_51_P105263	12.038346	P	9.201202	P	7.14604005230851	   269854	Nat14	Mus musculus N-acetyltransferase 14 (Nat14)	 mRNA [NM_201355]	N-acetyltransferase 14	Mm.42652	  4876260	chr7	  4876201	+	mm|7qA1	NM_201355	chr7:4876201-4876260	GO:0008150|GO:0003674|GO:0006355|GO:0008080|GO:0016020|GO:0008152|GO:0016021|GO:0005575|GO:0003677|GO:0016740|GO:0006351|GO:0008415	NM_201355
A_51_P105292	3.8405452	P	3.537034	A	1.23414439516588	   231326	Aasdh	Mus musculus aminoadipate-semialdehyde dehydrogenase (Aasdh)	 mRNA [NM_173765]	aminoadipate-semialdehyde dehydrogenase	Mm.39271	 77315156	chr5	 77313169	-	mm|5qC3.3	NM_173765	chr5:77315156-77313169	GO:0006629|GO:0048037|GO:0000036|GO:0016874|GO:0005575|GO:0003824|GO:0005524|GO:0003674|GO:0008150|GO:0031177|GO:0000166|GO:0008152|GO:0006631|GO:0016491|GO:0004043|GO:0055114	NM_173765
A_51_P105320	10.761827	P	10.700417	P	1.04348509978525	    76497	Ppp1r11	Mus musculus protein phosphatase 1	 regulatory (inhibitor) subunit 11 (Ppp1r11)	 mRNA [NM_029632]	protein phosphatase 1	 regulatory (inhibitor) subunit 11	Mm.46176	 37088519	chr17	 37088460	-	mm|17qB1	NM_029632	chr17:37088519-37088460	GO:0004864|GO:0043086	NM_029632
A_51_P105339	12.132848	P	11.765821	P	1.28969238698936	   223696	Tomm22	Mus musculus translocase of outer mitochondrial membrane 22 homolog (yeast) (Tomm22)	 nuclear gene encoding mitochondrial protein	 mRNA [NM_172609]	translocase of outer mitochondrial membrane 22 homolog (yeast)	Mm.485795	 79503151	chr15	 79503092	+	mm|15qE1	NM_172609	chr15:79503092-79503151	GO:0005743|GO:0005742|GO:0005741|GO:0008320|GO:0015031|GO:0045040|GO:0055085|GO:0006886|GO:0005739|GO:0016020|GO:0006810|GO:0000299|GO:0004872|GO:0016021	NM_172609
A_51_P105380	10.94191	P	10.849261	P	1.06632631777072	    76770	2010005H15Rik	Mus musculus RIKEN cDNA 2010005H15 gene (2010005H15Rik)	 mRNA [NM_029733]	RIKEN cDNA 2010005H15 gene	Mm.327617	 36257511	chr16	 36257452	+	mm|16qB3	NM_029733	chr16:36257452-36257511	GO:0008150|GO:0003674|GO:0004869|GO:0010466|GO:0005575|GO:0030414	NM_029733
A_51_P105408	11.309502	P	11.084742	P	1.16858283241568	    66789	Alg14	Mus musculus asparagine-linked glycosylation 14 homolog (yeast) (Alg14)	 mRNA [NM_024178]	asparagine-linked glycosylation 14 homolog (yeast)	Mm.269881	121064756	chr3	121064697	+	mm|3qG1	NM_024178	chr3:121064697-121064756	GO:0004577|GO:0016020|GO:0005783|GO:0005789|GO:0016021|GO:0006488	NM_024178
A_51_P105445	6.4331317	P	6.523423	P	0.939333065780737	   170459	Stard4	Mus musculus StAR-related lipid transfer (START) domain containing 4 (Stard4)	 mRNA [NM_133774]	StAR-related lipid transfer (START) domain containing 4	Mm.127058	 33368708	chr18	 33367833	-	mm|18qB1	NM_133774	chr18:33368708-33367833	GO:0005739|GO:0015485|GO:0006869|GO:0006810|GO:0008289	NM_133774
A_51_P105480	4.253533	P	4.0672364	A	1.13783912927745	   244551	Nanos3	Mus musculus nanos homolog 3 (Drosophila) (Nanos3)	 mRNA [NM_194059]	nanos homolog 3 (Drosophila)	Mm.216740	 86700269	chr8	 86700210	-	mm|8qC3	NM_194059	chr8:86700269-86700210	GO:0005515|GO:0048477|GO:0010494|GO:0003723|GO:0005634|GO:0006916|GO:0007275|GO:0007283|GO:0007281|GO:0046872|GO:0006417|GO:0030154|GO:0005737|GO:0000932|GO:0051726|GO:0008270	NM_194059
A_51_P105520	13.709643	P	13.394255	P	1.24434626416175	   211548	Nomo1	Mus musculus nodal modulator 1 (Nomo1)	 mRNA [NM_153057]	nodal modulator 1	Mm.274811	 53339570	chr7	 53339511	+	mm|7qB4	NM_153057	chr7:53339511-53339570	GO:0008150|GO:0003674|GO:0016020|GO:0004180|GO:0030246|GO:0016021|GO:0005575	NM_153057
A_51_P105554	1.9228683	A	1.914525	A	1.00579988947852	    12944	Crp	Mus musculus C-reactive protein	 pentraxin-related (Crp)	 mRNA [NM_007768]	C-reactive protein	 pentraxin-related	Mm.28767	174629511	chr1	174629452	+	mm|1qH3	NM_007768	chr1:174629452-174629511	GO:0051258|GO:0010745|GO:0015485|GO:0006958|GO:0030169|GO:0005615|GO:0042803|GO:0010888	NM_007768
A_51_P105589	13.264099	P	13.0493	P	1.16054221338049	    13177	Eci1	Mus musculus enoyl-Coenzyme A delta isomerase 1 (Eci1)	 nuclear gene encoding mitochondrial protein	 mRNA [NM_010023]	enoyl-Coenzyme A delta isomerase 1	Mm.291743	 24575912	chr17	 24574515	+	mm|17qA3.3	NM_010023	chr17:24574515-24575912	GO:0005739|GO:0006635|GO:0004165|GO:0008152|GO:0005743|GO:0016853|GO:0042802	NM_010023
A_51_P105604	11.25862	P	10.984526	P	1.20923446194769	   108664	Atp6v1h	Mus musculus ATPase	 H+ transporting	 lysosomal V1 subunit H (Atp6v1h)	 mRNA [NM_133826]	ATPase	 H+ transporting	 lysosomal V1 subunit H	Mm.27082	  5133875	chr1	  5126004	+	mm|1qA1	NM_133826	chr1:5126004-5133875	GO:0005886|GO:0050690|GO:0005829|GO:0006897|GO:0000221|GO:0003674|GO:0033572|GO:0005488|GO:0046961|GO:0006810|GO:0015991|GO:0016820|GO:0006811|GO:0015992	NM_133826
A_51_P105709	9.259491	P	9.222596	P	1.02590347689921	    69716	Trip13	Mus musculus thyroid hormone receptor interactor 13 (Trip13)	 mRNA [NM_027182]	thyroid hormone receptor interactor 13	Mm.275095	 74050175	chr13	 74050116	-	mm|13qC1	NM_027182	chr13:74050175-74050116	GO:0005515|GO:0017111|GO:0048477|GO:0000239|GO:0007286|GO:0001556|GO:0007283|GO:0005524|GO:0030154|GO:0042802|GO:0006302|GO:0007126|GO:0007144|GO:0000166|GO:0001673|GO:0007130|GO:0007141|GO:0007131	NM_027182
A_51_P105755	6.57131	P	7.067999	P	0.708731462159746	    69930	Zfp715	Mus musculus 10 days embryo whole body cDNA	 RIKEN full-length enriched library	 clone:2610041B18 product:weakly similar to BA162G10.3 (ZINC FINGER PROTEIN) (FRAGMENT) [Homo sapiens]	 full insert sequence. [AK011730]	zinc finger protein 715	Mm.45367	 50551722	chr7	 50551663	-	mm|7qB4	AK011730	chr7:50551722-50551663	GO:0008150|GO:0003674|GO:0046872
A_51_P105766	4.417759	P	3.6135771	A	1.74615532971563	NA		Mus musculus 0 day neonate lung cDNA	 RIKEN full-length enriched library	 clone:E030031J08 product:unclassifiable	 full insert sequence. [AK087171]		Mm.443151	 29117000	chr11	 29116941	-	mm|11qA3.3	AK087171	chr11:29117000-29116941
A_51_P105800	6.130722	P	6.89971	P	0.58682897022653	   244650	Phlpp2	Mus musculus PH domain and leucine rich repeat protein phosphatase 2 (Phlpp2)	 mRNA [NM_001122594]	PH domain and leucine rich repeat protein phosphatase 2	Mm.23494	112464553	chr8	112464494	+	mm|8qD3	NM_001122594	chr8:112464494-112464553	GO:0001917|GO:0005737|GO:0006470|GO:0016787|GO:0016020|GO:0042622|GO:0005624|GO:0005634|GO:0004721|GO:0004722|GO:0003824|GO:0046872	NM_001122594
A_51_P105810	12.659472	P	12.917018	P	0.836509598717547	    70239	Gtf3c5	Mus musculus general transcription factor IIIC	 polypeptide 5 (Gtf3c5)	 mRNA [NM_148928]	general transcription factor IIIC	 polypeptide 5	Mm.274120	 28421978	chr2	 28421919	-	mm|2qA3	NM_148928	chr2:28421978-28421919	GO:0008150|GO:0003674|GO:0000127|GO:0005634|GO:0003677|GO:0006351	NM_148928
A_51_P105822	6.016779	P	6.4447837	P	0.743289070730561	   240216	E230025N22Rik	Mus musculus Riken cDNA E230025N22 gene (E230025N22Rik)	 mRNA [NM_172831]	Riken cDNA E230025N22 gene	Mm.252323	 36844886	chr18	 36844827	-	mm|18qB2	NM_172831	chr18:36844886-36844827	GO:0008150|GO:0003674|GO:0005575	NM_172831
A_51_P105837	11.748577	P	12.121772	P	0.77207077009679	    17684	Cited2	Mus musculus Cbp/p300-interacting transactivator	 with Glu/Asp-rich carboxy-terminal domain	 2 (Cited2)	 mRNA [NM_010828]	Cbp/p300-interacting transactivator	 with Glu/Asp-rich carboxy-terminal domain	 2	Mm.272321	 17445262	chr10	 17445203	+	mm|10qA2	NM_010828	chr10:17445203-17445262	GO:0043627|GO:0030325|GO:0008283|GO:0034405|GO:0005634|GO:0007507|GO:0046697|GO:0005737|GO:0035360|GO:0003712|GO:0001666|GO:0006355|GO:0030336|GO:0001568|GO:0006357|GO:0003714|GO:0003713|GO:0060136|GO:0001892|GO:0000122|GO:0050693|GO:0001829|GO:0007417|GO:0001701|GO:0010628|GO:0010629|GO:0045893|GO:0001570|GO:0045892	NM_010828
A_51_P105847	2.191817	A	3.2120092	A	0.493050662237866	   245026	Col6a6	Mus musculus collagen	 type VI	 alpha 6 (Col6a6)	 transcript variant 2	 mRNA [NM_172927]	collagen	 type VI	 alpha 6	Mm.482507	105676655	chr9	105676597	-	mm|9qF1	NM_172927	chr9:105676655-105676597	GO:0031012|GO:0005581|GO:0005578|GO:0005576|GO:0007155	NM_172927
A_51_P105869	8.095575	P	7.749357	P	1.27122376444010	    72180	Zfp661	Mus musculus zinc finger protein 661 (Zfp661)	 transcript variant 1	 mRNA [NM_028141]	zinc finger protein 661	Mm.46715	127401507	chr2	127401448	-	mm|2qF1	NM_028141	chr2:127401507-127401448	GO:0005622|GO:0008150|GO:0003674|GO:0006355|GO:0008270|GO:0005634|GO:0005575|GO:0003676|GO:0003677|GO:0046872|GO:0006351	NM_028141
A_51_P105879	11.322308	P	11.192881	P	1.09385916328169	    17919	Myo5b	Mus musculus myosin VB (Myo5b)	 mRNA [NM_201600]	myosin VB	Mm.260098	 74930230	chr18	 74930170	+	mm|18qE2	NM_201600	chr18:74930170-74930230	GO:0032880|GO:0048471|GO:0017137|GO:0043197|GO:0035255|GO:0043025|GO:0019717|GO:0015031	NM_201600
A_51_P105887	8.291344	P	9.613298	P	0.399992817642169	   240754	Lax1	Mus musculus lymphocyte transmembrane adaptor 1 (Lax1)	 transcript variant 2	 mRNA [NM_172842]	lymphocyte transmembrane adaptor 1	Mm.36534	135576189	chr1	135576130	-	mm|1qE4	NM_172842	chr1:135576189-135576130	GO:0046649|GO:0005794|GO:0005886|GO:0019901|GO:0050868|GO:0050851|GO:0000188|GO:0035556|GO:0042113|GO:0005737|GO:0006955|GO:0016020|GO:0016021|GO:0042169|GO:0048305	NM_172842
A_51_P105908	5.954529	P	6.0739737	P	0.920541903283856	NA					 63804610	chr12	 63804551	-	mm|12qC1		chr12:063804610-063804551
A_51_P105927	8.783636	P	9.566035	P	0.58139920344443	    70784	Rasl12	Mus musculus RAS-like	 family 12 (Rasl12)	 transcript variant 1	 mRNA [NM_001033158]	RAS-like	 family 12	Mm.35827	 65260504	chr9	 65260445	+	mm|9qC	NM_001033158	chr9:65260445-65260504	GO:0006184|GO:0008150|GO:0007165|GO:0003674|GO:0016020|GO:0000166|GO:0007264|GO:0003924|GO:0005575|GO:0005525	NM_001033158
A_51_P105986	11.631568	P	12.10729	P	0.719106821302306	    20973	Syngr2	Mus musculus synaptogyrin 2 (Syngr2)	 mRNA [NM_009304]	synaptogyrin 2	Mm.468228	117675047	chr11	117674988	+	mm|11qE2	NM_009304	chr11:117674988-117675047	GO:0016020|GO:0031410|GO:0016021|GO:0006605|GO:0008021	NM_009304
A_51_P105991	9.456089	P	9.4201975	P	1.02519013405915	    21389	Tbx6	Mus musculus T-box 6 (Tbx6)	 mRNA [NM_011538]	T-box 6	Mm.727	133929058	chr7	133928999	+	mm|7qF3	NM_011538	chr7:133928999-133929058	GO:0006355|GO:0003700|GO:0001707|GO:0001708|GO:0023019|GO:0007275|GO:0005634|GO:0003677|GO:0006351	NM_011538
A_51_P106000	10.076625	P	6.63667	P	10.8524961073335	   320827	C530008M17Rik	Mus musculus RIKEN cDNA C530008M17 gene (C530008M17Rik)	 mRNA [NM_001163793]	RIKEN cDNA C530008M17 gene	Mm.101504	 77302235	chr5	 77302176	+	mm|5qC3.3	NM_001163793	chr5:77302176-77302235	GO:0008150|GO:0003674|GO:0005575	NM_001163793
A_51_P106059	12.14496	P	12.429847	P	0.820805896432878	    22032	Traf4	Mus musculus TNF receptor associated factor 4 (Traf4)	 mRNA [NM_009423]	TNF receptor associated factor 4	Mm.390418	 77972972	chr11	 77972913	-	mm|11qB5	NM_009423	chr11:77972972-77972913	GO:0004842|GO:0090073|GO:0030054|GO:0016567|GO:0019901|GO:0005886|GO:0007585|GO:0050699|GO:0030323|GO:0046330|GO:0006915|GO:0042981|GO:0005634|GO:0007275|GO:0046872|GO:0007165|GO:0005737|GO:0016020|GO:0045860|GO:0004872|GO:0008270|GO:0005923|GO:0005856	NM_009423
A_51_P106114	2.820513	A	2.0937433	A	1.65492943171266	100043072	A230070E04Rik	Mus musculus 0 day neonate cerebellum cDNA	 RIKEN full-length enriched library	 clone:C230086E23 product:hypothetical Leucine-rich region containing protein	 full insert sequence. [AK048964]	RIKEN cDNA A230070E04 gene	Mm.242832	 68743970	chr14	 68743911	+	mm|14qD1	AK048964	chr14:68743911-68743970	GO:0008150|GO:0003674|GO:0005575
A_51_P106144	11.403118	P	11.546448	P	0.905426853286162	    22722	Zfp64	Mus musculus zinc finger protein 64 (Zfp64)	 mRNA [NM_009564]	zinc finger protein 64	Mm.2095	168751005	chr2	168750946	-	mm|2qH3	NM_009564	chr2:168751005-168750946	GO:0005622|GO:0006355|GO:0008270|GO:0007275|GO:0005634|GO:0003676|GO:0003677|GO:0046872|GO:0006351	NM_009564
A_51_P106191	10.655607	P	11.253568	P	0.660687062769347	    56705	Ranbp9	Mus musculus B cell antigen receptor Ig beta associated protein 1 (IBAP-1) mRNA	 complete cds. [AF006465]	RAN binding protein 9	Mm.148781	 43498840	chr13	 43498782	-	mm|13qA4	AF006465	chr13:43498840-43498782	GO:0005515|GO:0005813|GO:0005737|GO:0008536|GO:0005634|GO:0019899|GO:0005829
A_51_P106202	2.7194438	A	3.3301988	A	0.654853910084244	NA		Mus musculus 17 days embryo head cDNA	 RIKEN full-length enriched library	 clone:3300001G06 product:unclassifiable	 full insert sequence. [AK076168]			 41428483	chr9	 41428424	+	mm|9qA5.1	AK076168	chr9:41428424-41428483
A_51_P106211	7.6149497	P	7.8124485	P	0.87206114564067	    56752	Aldh9a1	Mus musculus aldehyde dehydrogenase 9	 subfamily A1 (Aldh9a1)	 mRNA [NM_019993]	aldehyde dehydrogenase 9	 subfamily A1	Mm.330055	169294675	chr1	169292000	+	mm|1qH2.3	NM_019993	chr1:169292000-169294675	GO:0005886|GO:0004029|GO:0006081|GO:0042803|GO:0005829|GO:0005739|GO:0005737|GO:0051287|GO:0047105|GO:0008152|GO:0016620|GO:0043176|GO:0016491|GO:0019145|GO:0042136|GO:0009437|GO:0055114	NM_019993
A_51_P106227	12.43544	P	12.533767	P	0.934115597059851	    26441	Psma4	Mus musculus proteasome (prosome	 macropain) subunit	 alpha type 4 (Psma4)	 mRNA [NM_011966]	proteasome (prosome	 macropain) subunit	 alpha type 4	Mm.30270	 54802690	chr9	 54802491	+	mm|9qB	NM_011966	chr9:54802491-54802690	GO:0006511|GO:0000502|GO:0005839|GO:0051437|GO:0005634|GO:0051436|GO:0031145|GO:0004298|GO:0042802|GO:0005737|GO:0019773|GO:0004175|GO:0016787|GO:0051603|GO:0008233	NM_011966
A_51_P106249	3.3115435	A	4.934296	P	0.324715352098307	    75502	Cmtm2b	Mus musculus CKLF-like MARVEL transmembrane domain containing 2B (Cmtm2b)	 mRNA [NM_028524]	CKLF-like MARVEL transmembrane domain containing 2B	Mm.232593	106846560	chr8	106846391	+	mm|8qD3	NM_028524	chr8:106846391-106846560	GO:0016020|GO:0006935|GO:0016021|GO:0005615|GO:0005125	NM_028524
A_51_P106259	8.676447	P	7.7283936	P	1.92926777787891	    52163	Camk1	Mus musculus calcium/calmodulin-dependent protein kinase I (Camk1)	 mRNA [NM_133926]	calcium/calmodulin-dependent protein kinase I	Mm.277373	113286428	chr6	113286369	-	mm|6qE3	NM_133926	chr6:113286428-113286369	GO:0005515|GO:0005516|GO:0007275|GO:0005634|GO:0003824|GO:0005524|GO:0030154|GO:0007399|GO:0006913|GO:0016310|GO:0007165|GO:0005737|GO:0051149|GO:0004672|GO:0000166|GO:0016301|GO:0004674|GO:0008152|GO:0006468|GO:0004683|GO:0016740|GO:0016772|GO:0005954	NM_133926
A_51_P106263	7.916667	P	7.2379327	P	1.6007347881091	    52163	Camk1	Mus musculus calcium/calmodulin-dependent protein kinase I (Camk1)	 mRNA [NM_133926]	calcium/calmodulin-dependent protein kinase I	Mm.277373	113287268	chr6	113287209	-	mm|6qE3	NM_133926	chr6:113287268-113287209	GO:0005515|GO:0005516|GO:0007275|GO:0005634|GO:0003824|GO:0005524|GO:0030154|GO:0007399|GO:0006913|GO:0016310|GO:0007165|GO:0005737|GO:0051149|GO:0004672|GO:0000166|GO:0016301|GO:0004674|GO:0008152|GO:0006468|GO:0004683|GO:0016740|GO:0016772|GO:0005954	NM_133926
A_51_P106269	8.375933	P	8.950121	P	0.671664181476461	    57916	Tnfrsf13b	Mus musculus tumor necrosis factor receptor superfamily	 member 13b (Tnfrsf13b)	 mRNA [NM_021349]	tumor necrosis factor receptor superfamily	 member 13b	Mm.265915	 60960376	chr11	 60954968	+	mm|11qB2	NM_021349	chr11:60954968-60960376	GO:0001782|GO:0016020|GO:0005887|GO:0030889|GO:0004872|GO:0016021|GO:0009897	NM_021349
A_51_P106294	5.3595605	P	5.795089	P	0.73942283350598	   103988	Gck	Mus musculus glucokinase (Gck)	 mRNA [NM_010292]	glucokinase	Mm.220358	  5804412	chr11	  5803248	-	mm|11qA1	NM_010292	chr11:5804412-5803248	GO:0005515|GO:0032811|GO:0001678|GO:0005884|GO:0005634|GO:0043266|GO:0004396|GO:0007204|GO:0005536|GO:0006096|GO:0005829|GO:0005739|GO:0005737|GO:0000166|GO:0016301|GO:0044320|GO:0016773|GO:0006006|GO:0032024|GO:0042149|GO:0045821|GO:0030141|GO:0006003|GO:0051156|GO:0005938|GO:0045721|GO:0032869|GO:0000287|GO:0045725|GO:0005975|GO:0019903|GO:0005978|GO:0005625|GO:0006739|GO:0042593|GO:0005524|GO:0004340|GO:0016310|GO:0070509|GO:0051594|GO:0050796|GO:0043531|GO:0044448|GO:0019932|GO:0046835|GO:0005654|GO:0016740|GO:0042327	NM_010292
A_51_P106322	11.08581	P	11.498288	P	0.751331763279357	   106512	Gpsm3	Mus musculus G-protein signalling modulator 3 (AGS3-like	 C. elegans) (Gpsm3)	 mRNA [NM_134116]	G-protein signalling modulator 3 (AGS3-like	 C. elegans)	Mm.26584	 34728469	chr17	 34728410	+	mm|17qB1	NM_134116	chr17:34728410-34728469	GO:0007165|GO:0005737|GO:0005096	NM_134116
A_51_P106373	13.273662	P	12.908726	P	1.28782449851974	    66052	Sdhc	Mus musculus succinate dehydrogenase complex	 subunit C	 integral membrane protein (Sdhc)	 nuclear gene encoding mitochondrial protein	 mRNA [NM_025321]	succinate dehydrogenase complex	 subunit C	 integral membrane protein	Mm.198138	173059716	chr1	173059657	-	mm|1qH3	NM_025321	chr1:173059716-173059657	GO:0005739|GO:0006099|GO:0016020|GO:0006810|GO:0005743|GO:0009055|GO:0000104|GO:0016021|GO:0022900|GO:0016627|GO:0046872|GO:0045282	NM_025321
A_51_P106377	3.2771432	A	3.52973	A	0.839390011044975	NA		Q9EQ42_MOUSE (Q9EQ42) Vomeronasal receptor V1RC1	 complete [TC1600815]			 57021055	chr6	 57020996	+	mm|6qB3		chr6:057020996-057021055	GO:0016503|GO:0007186|GO:0007606|GO:0004872|GO:0001584|GO:0016021|GO:0005615
A_51_P106397	8.333312	P	8.658631	P	0.798121890960202	    75292	Prkd3	Mus musculus protein kinase D3 (Prkd3)	 transcript variant 2	 mRNA [NM_029239]	protein kinase D3	Mm.252776	 79352028	chr17	 79351323	-	mm|17qE3	NM_029239	chr17:79352028-79351323	GO:0005634|GO:0005524|GO:0046872|GO:0035556|GO:0016310|GO:0005737|GO:0004672|GO:0000166|GO:0016020|GO:0004674|GO:0016301|GO:0006468|GO:0004697|GO:0016740|GO:0016772	NM_029239
A_51_P106428	13.899846	P	13.64826	P	1.19051516661847	    67872	Nsmce4a	Mus musculus non-SMC element 4 homolog A (S. cerevisiae) (Nsmce4a)	 mRNA [NM_001162855]	non-SMC element 4 homolog A (S. cerevisiae)	Mm.21714	137676108	chr7	137676049	-	mm|7qF3	NM_001162855	chr7:137676108-137676049	GO:0008150|GO:0003674|GO:0005575	NM_001162855
A_51_P106443	5.7526617	P	6.2679186	P	0.699668332106595	    67534	Ttll4	Mus musculus tubulin tyrosine ligase-like family	 member 4 (Ttll4)	 mRNA [NM_001014974]	tubulin tyrosine ligase-like family	 member 4	Mm.260714	 74743090	chr1	 74743031	+	mm|1qC3	NM_001014974	chr1:74743031-74743090	GO:0018095|GO:0005929|GO:0005737|GO:0015631|GO:0004835|GO:0016874|GO:0042995|GO:0005575|GO:0005856|GO:0005524|GO:0006464	NM_001014974
A_51_P106455	2.8047748	A	3.2220044	A	0.748861279007218	    11614	Nr0b1	Mus musculus nuclear receptor subfamily 0	 group B	 member 1 (Nr0b1)	 mRNA [NM_007430]	nuclear receptor subfamily 0	 group B	 member 1	Mm.5180	 83441228	chrX	 83441169	+	mm|XqC1	NM_007430	chrX:83441169-83441228	GO:0005515|GO:0008406|GO:0006694|GO:0003700|GO:0030325|GO:0003723|GO:0035258|GO:0033144|GO:0003707|GO:0003706|GO:0050682|GO:0005634|GO:0007283|GO:0043433|GO:0042803|GO:0030154|GO:0007530|GO:0060008|GO:0005737|GO:0003690|GO:0008104|GO:0042788|GO:0030238|GO:0043401|GO:0004872|GO:0006355|GO:0003714|GO:0019904|GO:0006950|GO:0005624|GO:0032448|GO:0005626|GO:0000122|GO:0003677|GO:0006351|GO:0043565|GO:0033327|GO:0045596|GO:0045892|GO:0030522|GO:0008584|GO:0008134	NM_007430
A_51_P106474	9.669502	P	9.948729	P	0.824032417857713	    68040	Zfp593	Mus musculus activated spleen cDNA	 RIKEN full-length enriched library	 clone:F830108D24 product:Zinc finger protein T86	 full insert sequence. [AK156931]	zinc finger protein 593	Mm.300404	133799323	chr4	133799268	-	mm|4qD3	AK156931	chr4:133799323-133799268	GO:0005622|GO:0008150|GO:0003674|GO:0006355|GO:0008270|GO:0005634|GO:0005575|GO:0003677|GO:0046872|GO:0006351
A_51_P106488	8.946708	P	9.4666395	P	0.697404945581712	    11790	Speg	Mus musculus SPEG complex locus (Speg)	 transcript variant 3	 mRNA [NM_001085371]	SPEG complex locus	Mm.275397	 75401081	chr1	 75401022	+	mm|1qC4	NM_001085371	chr1:75401022-75401081	GO:0016310|GO:0004672|GO:0000166|GO:0016301|GO:0004674|GO:0006468|GO:0005634|GO:0005524|GO:0030154|GO:0016740|GO:0016772	NM_001085371
A_51_P106527	10.852773	P	11.087809	P	0.849663796959768	    68241	Fam195a	Mus musculus family with sequence similarity 195	 member A (Fam195a)	 mRNA [NM_026633]	family with sequence similarity 195	 member A	Mm.328870	 26000829	chr17	 26000770	-	mm|17qA3.3	NM_026633	chr17:26000829-26000770	GO:0005515|GO:0008150|GO:0005575	NM_026633
A_51_P106538	11.117378	P	11.54203	P	0.745018419669863	    78558	Htra3	Mus musculus HtrA serine peptidase 3 (Htra3)	 transcript variant 1	 mRNA [NM_030127]	HtrA serine peptidase 3	Mm.274255	 35994822	chr5	 35994763	-	mm|5qB3	NM_030127	chr5:35994822-35994763	GO:0016787|GO:0004252|GO:0006508|GO:0008236|GO:0008233|GO:0005576|GO:0003824|GO:0001558|GO:0005520	NM_030127
A_51_P106591	12.346949	P	6.085801	P	76.6996452552922	    78784	Celf3	Mus musculus VCUGBP	 Elav-like family member 3 (Celf3)	 mRNA [NM_172434]	VCUGBP	 Elav-like family member 3	Mm.44292	 94296049	chr3	 94295991	+	mm|3qF2.1	NM_172434	chr3:94295991-94296049	GO:0008380|GO:0006397|GO:0005737|GO:0000166|GO:0000381|GO:0003723|GO:0005634|GO:0030317|GO:0007283|GO:0003676	NM_172434
A_51_P106634	2.1608953	A	2.139216	A	1.01514041788743	    14997	H2-M9	Mus musculus histocompatibility 2	 M region locus 9 (H2-M9)	 mRNA [NM_008205]	histocompatibility 2	 M region locus 9	Mm.57004	 36779101	chr17	 36779042	-	mm|17qB1	NM_008205	chr17:36779101-36779042	GO:0008150|GO:0003674|GO:0016021|GO:0005575	NM_008205
A_51_P106735	2.242733	A	2.2213511	A	1.01493117640781	NA		Mus musculus activated spleen cDNA	 RIKEN full-length enriched library	 clone:F830005N24 product:unclassifiable	 full insert sequence. [AK089634]			 69603672	chr6	 69603613	-	mm|6qC1	AK089634	chr6:69603672-69603613
A_51_P106743	13.221341	P	13.340381	P	0.920800166849535	    16179	Irak1	Mus musculus interleukin-1 receptor-associated kinase 1 (Irak1)	 transcript variant 4	 mRNA [NM_008363]	interleukin-1 receptor-associated kinase 1	Mm.38241	 71260560	chrX	 71260501	-	mm|XqA7.3	NM_008363	chrX:71260560-71260501	GO:0005515|GO:0004842|GO:0034142|GO:0016567|GO:0005886|GO:0019221|GO:0051259|GO:0042803|GO:0042802|GO:0005829|GO:0002756|GO:0051092|GO:0046777|GO:0000166|GO:0043406|GO:0016301|GO:0045944|GO:0002755|GO:0032496|GO:0004872|GO:0043507|GO:0031663|GO:0070555|GO:0070498|GO:0016772|GO:0005149|GO:0046982|GO:0007250|GO:0034134|GO:0007254|GO:0005624|GO:0032088|GO:0005625|GO:0006916|GO:0048661|GO:0005524|GO:0001959|GO:0007165|GO:0016310|GO:0004672|GO:0004674|GO:0090370|GO:0032494|GO:0006468|GO:0045892|GO:0010008|GO:0016740	NM_008363
A_51_P106745	10.981827	P	11.135782	P	0.898783160679432	    16179	Irak1	Mus musculus interleukin-1 receptor-associated kinase 1 (Irak1)	 transcript variant 4	 mRNA [NM_008363]	interleukin-1 receptor-associated kinase 1	Mm.38241	 71260810	chrX	 71260751	-	mm|XqA7.3	NM_008363	chrX:71260810-71260751	GO:0005515|GO:0004842|GO:0034142|GO:0016567|GO:0005886|GO:0019221|GO:0051259|GO:0042803|GO:0042802|GO:0005829|GO:0002756|GO:0051092|GO:0046777|GO:0000166|GO:0043406|GO:0016301|GO:0045944|GO:0002755|GO:0032496|GO:0004872|GO:0043507|GO:0031663|GO:0070555|GO:0070498|GO:0016772|GO:0005149|GO:0046982|GO:0007250|GO:0034134|GO:0007254|GO:0005624|GO:0032088|GO:0005625|GO:0006916|GO:0048661|GO:0005524|GO:0001959|GO:0007165|GO:0016310|GO:0004672|GO:0004674|GO:0090370|GO:0032494|GO:0006468|GO:0045892|GO:0010008|GO:0016740	NM_008363
A_51_P106752	6.660454	P	6.575	P	1.06102158046687	    67897	Rnmt	Mus musculus RNA (guanine-7-) methyltransferase (Rnmt)	 transcript variant 1	 mRNA [NM_026440]	RNA (guanine-7-) methyltransferase	Mm.27544	 68483282	chr18	 68483222	+	mm|18qE2	NM_026440	chr18:68483222-68483282	GO:0006397|GO:0003723|GO:0008168|GO:0004482|GO:0006370|GO:0080009|GO:0005654|GO:0005634|GO:0032259|GO:0016740|GO:0005845	NM_026440
A_51_P106779	8.932492	P	9.322615	P	0.763064545034258	    30785	Cttnbp2	Mus musculus cortactin binding protein 2 (Cttnbp2)	 mRNA [NM_080285]	cortactin binding protein 2	Mm.485470	 18316917	chr6	 18316858	-	mm|6qA2	NM_080285	chr6:18316917-18316858	GO:0017124|GO:0030036|GO:0005519|GO:0015629|GO:0008021	NM_080285
A_51_P106799	9.256878	P	9.277734	P	0.985647712676052	    19016	Pparg	Mus musculus peroxisome proliferator activated receptor gamma (Pparg)	 transcript variant 2	 mRNA [NM_011146]	peroxisome proliferator activated receptor gamma	Mm.3020	115440272	chr6	115440213	+	mm|6qE3	NM_011146	chr6:115440213-115440272	GO:0051974|GO:0005515|GO:0030308|GO:0003700|GO:0050544|GO:0044212|GO:0045598|GO:0003707|GO:0001818|GO:0060336|GO:0042953|GO:0045444|GO:0004879|GO:0071285|GO:0019395|GO:0032869|GO:0010745|GO:0046321|GO:0000122|GO:0001890|GO:0002674|GO:0019216|GO:0055098|GO:0045165|GO:0050872|GO:0050873|GO:0045600|GO:0008270|GO:0045893|GO:0001012|GO:0015909|GO:0019899|GO:0045892|GO:0008285|GO:0033993|GO:0005634|GO:0010871|GO:0046872|GO:0005829|GO:0046965|GO:0051091|GO:0006954|GO:0045944|GO:0008144|GO:0030855|GO:0043401|GO:0048469|GO:0004872|GO:0030224|GO:0033613|GO:0006355|GO:0045713|GO:0006919|GO:0006917|GO:0042593|GO:0003677|GO:0006351|GO:0010887|GO:0043565|GO:0007165|GO:0048714|GO:0003682|GO:0010891|GO:0008217|GO:0030522	NM_011146
A_51_P106859	11.934267	P	12.272876	P	0.790803411537105	   116748	Lsm10	Mus musculus U7 snRNP-specific Sm-like protein LSM10 (Lsm10)	 transcript variant 1	 mRNA [NM_138721]	U7 snRNP-specific Sm-like protein LSM10	Mm.41865	125775790	chr4	125775731	+	mm|4qD2.2	NM_138721	chr4:125775731-125775790	GO:0008380|GO:0006397|GO:0000084|GO:0015030|GO:0030529|GO:0003723|GO:0005683|GO:0017069|GO:0005634|GO:0071208	NM_138721
A_51_P106868	12.817661	P	13.385161	P	0.674785089340294	    30791	Slc39a1	Mus musculus solute carrier family 39 (zinc transporter)	 member 1 (Slc39a1)	 mRNA [NM_013901]	solute carrier family 39 (zinc transporter)	 member 1	Mm.472473	 90057354	chr3	 90057295	+	mm|3qF1	NM_013901	chr3:90057295-90057354	GO:0071577|GO:0005886|GO:0005385|GO:0005102|GO:0006829	NM_013901
A_51_P106893	5.578526	P	6.444324	P	0.548742796034413	    24136	Zeb2	Mus musculus 12 days embryo spinal ganglion cDNA	 RIKEN full-length enriched library	 clone:D130016B08 product:unclassifiable	 full insert sequence. [AK051204]	zinc finger E-box binding homeobox 2	Mm.440702	 44864837	chr2	 44864778	-	mm|2qB	AK051204	chr2:44864837-44864778	GO:0021846|GO:0001756|GO:0001755|GO:0005730|GO:0001843|GO:0030177|GO:0005634|GO:0007417|GO:0048598|GO:0003677|GO:0021766|GO:0005737|GO:0043507
A_51_P106900	1.9816914	A	1.9611546	A	1.01433682545673	    19434	Rax	Mus musculus retinal homeobox protein (Rx) mRNA	 complete cds. [AF001906]	retina and anterior neural fold homeobox	Mm.431047	 66094394	chr18	 66094335	-	mm|18qE1	AF001906	chr18:66094394-66094335	GO:0043565|GO:0007389|GO:0006355|GO:0003700|GO:0007420|GO:0060173|GO:0043010|GO:0007275|GO:0005634|GO:0021854|GO:0003677|GO:0006351
A_51_P106918	2.8648438	A	3.3641076	A	0.707467706290456	    19715	Rex2	Mus musculus putative REX-2 mRNA	 complete cds. [AF051348]	reduced expression 2	Mm.422606	146426640	chr4	146404699	+	mm|4qE1	AF051348	chr4:146404699-146426640	GO:0005634
A_51_P106952	11.870567	P	11.74155	P	1.09354834323788	    74213	Rbm26	Mus musculus RNA binding motif protein 26 (Rbm26)	 mRNA [NM_134077]	RNA binding motif protein 26	Mm.474531	105514008	chr14	105513949	-	mm|14qE2.3	NM_134077	chr14:105514008-105513949	GO:0006397|GO:0008150|GO:0003674|GO:0000166|GO:0003723|GO:0008270|GO:0005575|GO:0003676|GO:0046872	NM_134077
A_51_P106968	1.9833819	A	1.9972895	A	0.990406302255596	   329780	9330178D15Rik	Mus musculus adult male diencephalon cDNA	 RIKEN full-length enriched library	 clone:9330178D15 product:unclassifiable	 full insert sequence. [AK034327]	RIKEN cDNA 9330178D15 gene	Mm.119000	155670840	chr3	155670781	+	mm|3qH4	AK034327	chr3:155670781-155670840
A_51_P106979	5.340193	P	5.813183	P	0.720469868318232	    72022	Slc35f2	Mus musculus solute carrier family 35	 member F2 (Slc35f2)	 mRNA [NM_028060]	solute carrier family 35	 member F2	Mm.26159	 53665284	chr9	 53665225	+	mm|9qA5.3	NM_028060	chr9:53665225-53665284	GO:0008150|GO:0003674|GO:0016020|GO:0006810|GO:0016021|GO:0005575	NM_028060
A_51_P107020	14.186107	P	9.057019	P	34.9952691791578	    16572	Kif5a	Mus musculus kinesin family member 5A (Kif5a)	 transcript variant 1	 mRNA [NM_001039000]	kinesin family member 5A	Mm.30355	126662856	chr10	126662797	-	mm|10qD3	NM_001039000	chr10:126662856-126662797	GO:0005515|GO:0043005|GO:0005871|GO:0005874|GO:0003777|GO:0005524|GO:0032403|GO:0033267|GO:0005737|GO:0000166|GO:0035253|GO:0008152|GO:0005856|GO:0007018	NM_001039000
A_51_P107039	6.9855833	P	6.63035	P	1.27919242434214	   108978	4930555G01Rik	Mus musculus RIKEN cDNA 4930555G01 gene (4930555G01Rik)	 mRNA [NM_175393]	RIKEN cDNA 4930555G01 gene	Mm.396152	  5161729	chr14	  5161670	+	mm|14qA1	NM_175393	chr14:5161670-5161729	GO:0008150|GO:0003674|GO:0005575	NM_175393
A_51_P107053	4.658022	P	4.5374584	P	1.08715948685934	   244178	Ubqln3	Mus musculus ubiquilin 3 (Ubqln3)	 mRNA [NM_198623]	ubiquilin 3	Mm.334092	111289900	chr7	111289841	-	mm|7qE3	NM_198623	chr7:111289900-111289841	GO:0008150|GO:0003674|GO:0005575	NM_198623
A_51_P107066	6.8215184	P	6.9999876	P	0.88364010277738	    74158	Josd1	Mus musculus Josephin domain containing 1 (Josd1)	 mRNA [NM_028792]	Josephin domain containing 1	Mm.323393	 79505552	chr15	 79505493	-	mm|15qE1	NM_028792	chr15:79505552-79505493	GO:0008150|GO:0003674|GO:0016787|GO:0008152|GO:0008233|GO:0008242|GO:0005575	NM_028792
A_51_P107090	12.663689	P	12.202473	P	1.37670170565302	   407819	BC031181	Mus musculus cDNA sequence BC031181 (BC031181)	 mRNA [NM_001001181]	cDNA sequence BC031181	Mm.29866	 75169288	chr18	 75169229	+	mm|18qE3	NM_001001181	chr18:75169229-75169288	GO:0007165|GO:0005575|GO:0004871|GO:0043123	NM_001001181
A_51_P107099	2.0206816	A	2.0398612	A	0.986793693048476	NA		Mus musculus 16 days neonate thymus cDNA	 RIKEN full-length enriched library	 clone:A130090P07 product:unclassifiable	 full insert sequence. [AK038260]			110674465	chr10	110674406	+	mm|10qD1	AK038260	chr10:110674406-110674465
A_51_P107126	9.920446	P	9.969489	P	0.966577287481807	    51812	Mcrs1	Mus musculus microspherule protein 1 (Mcrs1)	 transcript variant 1	 mRNA [NM_016766]	microspherule protein 1	Mm.383472	 99074387	chr15	 99074171	-	mm|15qF1	NM_016766	chr15:99074387-99074171	GO:0031011|GO:0006355|GO:0006281|GO:0071339|GO:0006310|GO:0005634|GO:0006974|GO:0006351	NM_016766
A_51_P107140	2.4046228	A	3.5626295	A	0.44813126861967	    53617	Krt35	Mus musculus keratin 35 (Krt35)	 mRNA [NM_016880]	keratin 35	Mm.37952	 99953598	chr11	 99953539	-	mm|11qD	NM_016880	chr11:99953598-99953539	GO:0005882|GO:0005198	NM_016880
A_51_P107176	3.1358867	A	3.4378633	A	0.81114031187746	    74686	4930443G12Rik	Mus musculus RIKEN cDNA 4930443G12 gene (4930443G12Rik)	 mRNA [NM_029054]	RIKEN cDNA 4930443G12 gene	Mm.307948	108919469	chr3	108919410	+	mm|3qF3	NM_029054	chr3:108919410-108919469	GO:0005739|GO:0008150|GO:0003674|GO:0016020|GO:0006810|GO:0016021	NM_029054
A_51_P107234	13.421089	P	13.534218	P	0.924580602131032	   224742	Abcf1	Mus musculus ATP-binding cassette	 sub-family F (GCN20)	 member 1 (Abcf1)	 mRNA [NM_013854]	ATP-binding cassette	 sub-family F (GCN20)	 member 1	Mm.329022	 36093974	chr17	 36093915	-	mm|17qB1	NM_013854	chr17:36093974-36093915	GO:0017111|GO:0045727|GO:0005634|GO:0008494|GO:0005635|GO:0005524|GO:0006413|GO:0005737|GO:0000166|GO:0042788|GO:0005840|GO:0043022|GO:0005654|GO:0016887	NM_013854
A_51_P107243	8.698787	P	9.599587	P	0.535589654941304	NA		Mus musculus adult male urinary bladder cDNA	 RIKEN full-length enriched library	 clone:9530065M15 product:weakly similar to MHC CLASS I T7 ANTIGEN (FRAGMENT) [Mus musculus]	 full insert sequence. [AK079264]			  5258760	chr11	  5258701	-	mm|11qA1	AK079264	chr11:5258760-5258701
A_51_P107265	13.532431	P	12.684402	P	1.80004004231109	    56350	Arl3	Mus musculus ADP-ribosylation factor-like 3 (Arl3)	 mRNA [NM_019718]	ADP-ribosylation factor-like 3	Mm.22085	 46626070	chr19	 46617027	-	mm|19qC3	NM_019718	chr19:46626070-46617027	GO:0008017|GO:0005881|GO:0005813|GO:0005794|GO:0030496|GO:0005634|GO:0072372|GO:0042995|GO:0005525|GO:0046872|GO:0000910|GO:0005737|GO:0007049|GO:0000166|GO:0016020|GO:0032391|GO:0005876|GO:0019003|GO:0005856|GO:0051301	NM_019718
A_51_P107282	11.45147	P	11.51668	P	0.955806179452177	    66826	Taz	Mus musculus tafazzin (Taz)	 nuclear gene encoding mitochondrial protein	 transcript variant 2	 mRNA [NM_181516]	tafazzin	Mm.268483	 71535173	chrX	 71535114	+	mm|XqA7.3	NM_181516	chrX:71535114-71535173	GO:0030097|GO:0047184|GO:0060048|GO:0005739|GO:0007507|GO:0048738|GO:0032981|GO:0006936|GO:0007519|GO:0042775|GO:0046471|GO:0032049|GO:0042407	NM_181516
A_51_P107302	5.3753734	P	6.1167493	P	0.598168606071195	    12389	Cav1	Mus musculus caveolin 1	 caveolae protein (Cav1)	 mRNA [NM_007616]	caveolin 1	 caveolae protein	Mm.28278	 17289256	chr6	 17289197	+	mm|6qA2	NM_007616	chr6:17289197-17289256	GO:0005515|GO:0043627|GO:0019915|GO:0010524|GO:0030879|GO:0006940|GO:0031623|GO:0019861|GO:0005622|GO:0016050|GO:0009925|GO:0000165|GO:0009968|GO:0032507|GO:0005938|GO:0042632|GO:0019905|GO:0005811|GO:0033344|GO:0005794|GO:0009986|GO:0000122|GO:0019217|GO:0006897|GO:0016504|GO:0043234|GO:0005887|GO:0007519|GO:0032570|GO:0006641|GO:0045121|GO:0005925|GO:0032091|GO:0008285|GO:0005886|GO:0005783|GO:0031295|GO:0042524|GO:0005829|GO:0043409|GO:0030514|GO:0005739|GO:0000188|GO:0016323|GO:0033138|GO:0005737|GO:0016324|GO:0008104|GO:0001960|GO:0045019|GO:0033484|GO:0033137|GO:0030857|GO:0043407|GO:0042310|GO:0000149|GO:0006816|GO:0019900|GO:0002080|GO:0001666|GO:0031116|GO:0005623|GO:0005102|GO:0006874|GO:0005624|GO:0005625|GO:0009967|GO:0031410|GO:0045768|GO:0009612|GO:0010952|GO:0030193|GO:0000139|GO:0007595|GO:0016020|GO:0001937|GO:0005198|GO:0005901|GO:0000299|GO:0001570	NM_007616
A_51_P107315	11.687051	P	12.069389	P	0.767193286025866	   216225	Slc5a8	Mus musculus solute carrier family 5 (iodide transporter)	 member 8 (Slc5a8)	 mRNA [NM_145423]	solute carrier family 5 (iodide transporter)	 member 8	Mm.77381	 88391947	chr10	 88391888	+	mm|10qC1	NM_145423	chr10:88391888-88391947	GO:0005215|GO:0016020|GO:0005886|GO:0006810|GO:0006915|GO:0016021|GO:0006814|GO:0055085|GO:0022803|GO:0015293|GO:0006811	NM_145423
A_51_P107321	11.6130085	P	11.4900255	P	1.08898418321313	    67041	Oxct1	Mus musculus 3-oxoacid CoA transferase 1 (Oxct1)	 nuclear gene encoding mitochondrial protein	 mRNA [NM_024188]	3-oxoacid CoA transferase 1	Mm.13445	  4078876	chr15	  4051863	+	mm|15qA1	NM_024188	chr15:4051863-4078876	GO:0005739|GO:0046952|GO:0005759|GO:0046950|GO:0008152|GO:0071229|GO:0008410|GO:0032024|GO:0008260|GO:0071333|GO:0042803|GO:0016740	NM_024188
A_51_P107326	14.557105	P	14.628813	P	0.951510841664323	    67041	Oxct1	Mus musculus 3-oxoacid CoA transferase 1 (Oxct1)	 nuclear gene encoding mitochondrial protein	 mRNA [NM_024188]	3-oxoacid CoA transferase 1	Mm.13445	  4103957	chr15	  4103898	+	mm|15qA1	NM_024188	chr15:4103898-4103957	GO:0005739|GO:0046952|GO:0005759|GO:0046950|GO:0008152|GO:0071229|GO:0008410|GO:0032024|GO:0008260|GO:0071333|GO:0042803|GO:0016740	NM_024188
A_51_P107362	12.570723	P	13.147799	P	0.670320982896497	   216233	Socs2	Mus musculus suppressor of cytokine signaling 2 (Socs2)	 transcript variant 1	 mRNA [NM_007706]	suppressor of cytokine signaling 2	Mm.4132	 94875125	chr10	 94875066	-	mm|10qC2	NM_007706	chr10:94875125-94875066	GO:0005515|GO:0005159|GO:0005131|GO:0060396|GO:0032870|GO:0046426|GO:0035556|GO:0007595|GO:0040015|GO:0045666|GO:0040014|GO:0009968|GO:0032355|GO:0060749|GO:0040008	NM_007706
A_51_P107373	5.008129	P	2.027033	A	7.89585775679432	    77425	9430081G06Rik	Mus musculus 12 days embryo embryonic body between diaphragm region and neck cDNA	 RIKEN full-length enriched library	 clone:9430081G06 product:unclassifiable	 full insert sequence. [AK020499]	RIKEN cDNA 9430081G06 gene		 35059487	chr13	 35059428	+	mm|13qA3.3	AK020499	chr13:35059428-35059487	GO:0008150|GO:0003674|GO:0005575
A_51_P107378	11.192881	P	10.833567	P	1.28281577494368	    67276	Eri1	Mus musculus exoribonuclease 1 (Eri1)	 mRNA [NM_026067]	exoribonuclease 1	Mm.207534	 36530368	chr8	 36530309	-	mm|8qA4	NM_026067	chr8:36530368-36530309	GO:0008408|GO:0003723|GO:0006364|GO:0005730|GO:0005634|GO:0019843|GO:0031047|GO:0003676|GO:0046872|GO:0031125|GO:0005622|GO:0004518|GO:0004527|GO:0005737|GO:0016787|GO:0043022|GO:0071204|GO:0071207	NM_026067
A_51_P107433	12.39238	P	12.566856	P	0.886089296378497	    94065	Mrpl34	Mus musculus mitochondrial ribosomal protein L34 (Mrpl34)	 nuclear gene encoding mitochondrial protein	 mRNA [NM_053162]	mitochondrial ribosomal protein L34	Mm.29489	 73989585	chr8	 73989526	+	mm|8qB3.3	NM_053162	chr8:73989526-73989585	GO:0005739|GO:0005622|GO:0003735|GO:0030529|GO:0005840|GO:0006412|GO:0005762	NM_053162
A_51_P107438	9.055562	P	9.721041	P	0.630479339487363	    67501	Ccdc50	Mus musculus coiled-coil domain containing 50 (Ccdc50)	 transcript variant 1	 mRNA [NM_026202]	coiled-coil domain containing 50	Mm.258985	 27446433	chr16	 27446373	+	mm|16qB2	NM_026202	chr16:27446373-27446433	GO:0005737	NM_026202
A_51_P107463	4.593708	P	3.458327	A	2.19676569279783	   320522	Bhlha9	Mus musculus basic helix-loop-helix family	 member a9 (Bhlha9)	 mRNA [NM_177182]	basic helix-loop-helix family	 member a9	Mm.131585	 76487103	chr11	 76487044	+	mm|11qB5	NM_177182	chr11:76487044-76487103	GO:0006355|GO:0005634|GO:0003677|GO:0006351	NM_177182
A_51_P107547	10.694854	P	11.218943	P	0.695398085354961	   259089	Olfr571	Mus musculus olfactory receptor 571 (Olfr571)	 mRNA [NM_147085]	olfactory receptor 571	Mm.377834	110058061	chr7	110058002	-	mm|7qE3	NM_147085	chr7:110058061-110058002	GO:0007608|GO:0004984|GO:0007186|GO:0016021	NM_147085
A_51_P107558	2.7474062	A	2.709881	A	1.02635171133628	   245572	Tbx22	Mus musculus 12 days embryo eyeball cDNA	 RIKEN full-length enriched library	 clone:D230020M15 product:similar to T-BOX TRANSCRIPTION FACTOR TBX22 [Homo sapiens]	 full insert sequence. [AK084312]	T-box 22	Mm.137011	104881306	chrX	104881249	+	mm|XqD	AK084312	chrX:104881249-104881306	GO:0006355|GO:0003700|GO:0005634|GO:0000122|GO:0045892|GO:0003677|GO:0006351
A_51_P107591	5.9410653	P	7.8499346	P	0.266301175133846	    80782	Klrb1b	Mus musculus killer cell lectin-like receptor subfamily B member 1B (Klrb1b)	 mRNA [NM_030599]	killer cell lectin-like receptor subfamily B member 1B	Mm.6180	128764613	chr6	128764554	-	mm|6qF3	NM_030599	chr6:128764613-128764554	GO:0005515|GO:0007165|GO:0016020|GO:0005887|GO:0005488|GO:0045953|GO:0005529|GO:0004872|GO:0016021|GO:0042803|GO:0009897	NM_030599
A_51_P107599	13.00118	P	13.278542	P	0.82509834945294	    17129	Smad5	Mus musculus MAD homolog 5 (Drosophila) (Smad5)	 transcript variant 1	 mRNA [NM_008541]	MAD homolog 5 (Drosophila)	Mm.272920	 56843616	chr13	 56843557	+	mm|13qB1	NM_008541	chr13:56843557-56843616	GO:0005515|GO:0003700|GO:0005634|GO:0007281|GO:0060048|GO:0030154|GO:0005829|GO:0005622|GO:0005737|GO:0045944|GO:0001880|GO:0007179|GO:0031625|GO:0005667|GO:0006355|GO:0002051|GO:0007275|GO:0001525|GO:0030509|GO:0006351|GO:0045669|GO:0071407|GO:0030218|GO:0005654|GO:0006468	NM_008541
A_51_P107633	2.0842876	A	2.1042187	A	0.986279805962517	   433347	LOC433347	Mus musculus 0 day neonate lung cDNA	 RIKEN full-length enriched library	 clone:E030036M24 product:unclassifiable	 full insert sequence. [AK087224]	hypothetical LOC433347	Mm.325009	132680282	chr1	132680223	+	mm|1qE4	AK087224	chr1:132680223-132680282
A_51_P107652	10.743258	P	10.911011	P	0.890228133808965	    70129	Slc44a4	Mus musculus solute carrier family 44	 member 4 (Slc44a4)	 mRNA [NM_023557]	solute carrier family 44	 member 4	Mm.183126	 35065422	chr17	 35065253	+	mm|17qB1	NM_023557	chr17:35065253-35065422	GO:0008150|GO:0003674|GO:0016020|GO:0016021|GO:0005575	NM_023557
A_51_P107658	8.516302	P	6.0424037	P	5.55542891002751	    17207	Mcf2l	Mus musculus mcf.2 transforming sequence-like (Mcf2l)	 transcript variant 1	 mRNA [NM_178076]	mcf.2 transforming sequence-like	Mm.334413	 13018898	chr8	 13018839	+	mm|8qA1.1	NM_178076	chr8:13018839-13018898	GO:0005515|GO:0005085|GO:0008624|GO:0005545|GO:0050790|GO:0016020|GO:0006915|GO:0007266|GO:0005089|GO:0030027|GO:0005829	NM_178076
A_51_P107673	2.290167	A	2.7911499	A	0.70662519739073	   544791	Myh13	Mus musculus myosin	 heavy polypeptide 13	 skeletal muscle (Myh13)	 mRNA [NM_001081250]	myosin	 heavy polypeptide 13	 skeletal muscle	Mm.461064	 67148269	chr11	 67148210	+	mm|11qB3	NM_001081250	chr11:67148210-67148269	GO:0032982|GO:0000166|GO:0003779|GO:0016459|GO:0030016|GO:0005524|GO:0009267	NM_001081250
A_51_P107686	10.903898	P	11.515999	P	0.654243231952197	    17300	Foxc1	Mus musculus forkhead box C1 (Foxc1)	 mRNA [NM_008592]	forkhead box C1	Mm.12949	 31901316	chr13	 31901257	+	mm|13qA3.2	NM_008592	chr13:31901257-31901316	GO:0001656|GO:0001657|GO:0003700|GO:0055010|GO:0003705|GO:0001654|GO:0048844|GO:0007507|GO:0001946|GO:0014034|GO:0050880|GO:0003690|GO:0007219|GO:0014032|GO:0030199|GO:0030203|GO:0001945|GO:0008301|GO:0000122|GO:0001701|GO:0060038|GO:0031490|GO:0005720|GO:0001501|GO:0001503|GO:0007420|GO:0045930|GO:0048341|GO:0045893|GO:0048343|GO:0008134|GO:0005634|GO:0051090|GO:0001541|GO:0045944|GO:0042475|GO:0043010|GO:0005667|GO:0046620|GO:0048010|GO:0006355|GO:0008354|GO:0001568|GO:0035050|GO:0001822|GO:0048762|GO:0006916|GO:0003677|GO:0006351|GO:0043565|GO:0032808|GO:0003007|GO:0001974|GO:0001570	NM_008592
A_51_P107701	1.9206423	A	2.1257377	A	0.867481321976435	NA					NA		NA
A_51_P107722	1.9412785	A	1.9598866	A	0.987184672635035	NA		RIKEN cDNA 2610303G11 gene [Source:MGI Symbol;Acc:MGI:1917707] [ENSMUST00000061643]			 98087005	chr9	 98086946	-	mm|9qE3.3	AK011970	chr9:98087005-98086946
A_51_P107738	5.5661755	P	5.9667172	P	0.7575737776894	    72267	Lrrc8e	Mus musculus leucine rich repeat containing 8 family	 member E (Lrrc8e)	 mRNA [NM_028175]	leucine rich repeat containing 8 family	 member E	Mm.25479	  4231699	chr8	  4226984	+	mm|8qA1.1	NM_028175	chr8:4226984-4231699	GO:0008150|GO:0003674|GO:0016020|GO:0016021|GO:0005575	NM_028175
A_51_P107752	6.658423	P	6.760476	P	0.931706200771166	   320937	E430014L09Rik	Mus musculus 16 days embryo lung cDNA	 RIKEN full-length enriched library	 clone:8430403D15 product:unclassifiable	 full insert sequence. [AK033357]	RIKEN cDNA E430014L09 gene	Mm.333881	 56811449	chr7	 56811390	+	mm|7qB4	AK033357	chr7:56811390-56811449	GO:0008150|GO:0003674|GO:0005575
A_51_P107765	1.9763622	A	1.9528519	A	1.01642960378776	NA		Mus musculus 0 day neonate cerebellum cDNA	 RIKEN full-length enriched library	 clone:C230076G20 product:unclassifiable	 full insert sequence. [AK048858]			 60702277	chr8	 60702218	-	mm|8qB3.1	AK048858	chr8:60702277-60702218
A_51_P107782	11.606083	P	11.441919	P	1.12051658295192	    70750	Kdsr	Mus musculus 3-ketodihydrosphingosine reductase (Kdsr)	 mRNA [NM_027534]	3-ketodihydrosphingosine reductase	Mm.458911	108620698	chr1	108620639	-	mm|1qE2.1	NM_027534	chr1:108620698-108620639	GO:0047560|GO:0006666|GO:0016020|GO:0005783|GO:0005488|GO:0030148|GO:0008152|GO:0016491|GO:0005789|GO:0016021|GO:0055114	NM_027534
A_51_P107807	2.9368224	A	2.1346955	A	1.74366984618632	   259115	Olfr586	Mus musculus olfactory receptor 586 (Olfr586)	 mRNA [NM_147111]	olfactory receptor 586	Mm.223485	110270708	chr7	110270649	-	mm|7qE3	NM_147111	chr7:110270708-110270649	GO:0007608|GO:0007165|GO:0004984|GO:0007186|GO:0004930|GO:0004872|GO:0016021|GO:0004871	NM_147111
A_51_P107808	7.908986	P	8.120927	P	0.863374866157843	    72795	Ttc19	Mus musculus tetratricopeptide repeat domain 19 (Ttc19)	 transcript variant 1	 mRNA [NM_028360]	tetratricopeptide repeat domain 19	Mm.69739	 62129763	chr11	 62129704	+	mm|11qB2	NM_028360	chr11:62129704-62129763	GO:0005739|GO:0003674|GO:0034551|GO:0016020|GO:0005488|GO:0005743	NM_028360
A_51_P107901	6.4744644	P	7.2999406	P	0.56429591073457	    51788	H2afz	Mus musculus 9.5 days embryo parthenogenote cDNA	 RIKEN full-length enriched library	 clone:B130014G07 product:H2A histone family	 member Z	 full insert sequence. [AK044932]	H2A histone family	 member Z	Mm.117541	116122064	chr6	116122005	-	mm|6qE3	AK044932	chr6:116122064-116122005	GO:0001740|GO:0005694|GO:0006334|GO:0007275|GO:0005634|GO:0000786|GO:0003677
A_51_P107934	5.753471	P	2.0053504	A	13.4368270722355	   241656	Pak7	Mus musculus p21 protein (Cdc42/Rac)-activated kinase 7 (Pak7)	 mRNA [NM_172858]	p21 protein (Cdc42/Rac)-activated kinase 7	Mm.131572	135907833	chr2	135907774	-	mm|2qF3	NM_172858	chr2:135907833-135907774	GO:0005739|GO:0016310|GO:0004672|GO:0000166|GO:0016301|GO:0004674|GO:0006916|GO:0005524|GO:0016740|GO:0016772	NM_172858
A_51_P107938	7.2987156	P	8.063127	P	0.5886934985803	    22222	Ubr1	Mus musculus ubiquitin protein ligase E3 component n-recognin 1 (Ubr1)	 mRNA [NM_009461]	ubiquitin protein ligase E3 component n-recognin 1	Mm.389330	120686024	chr2	120686008	-	mm|2qE5	NM_009461	chr2:120686024-120686008	GO:0005515|GO:0071233|GO:0006511|GO:0032007|GO:0004842|GO:0000502|GO:0016567|GO:0016874|GO:0070728|GO:0008152|GO:0000151	NM_009461
A_51_P107959	3.780253	A	3.9008698	A	0.919794323957606	NA		RIKEN cDNA 1700026J12 gene [Source:MGI Symbol;Acc:MGI:1920505] [ENSMUST00000098226]		Mm.307720	 49216954	chr16	 49210961	-	mm|16qB5	XR_033917	chr16:49216954-49210961		XR_033917
A_51_P107985	2.1404114	A	2.1796021	A	0.973200724901525	    73304	1700034J04Rik	RIKEN cDNA 1700034J04 gene [Source:MGI Symbol;Acc:MGI:1920554] [ENSMUST00000055358]	RIKEN cDNA 1700034J04 gene	Mm.484041	 11228331	chr12	 11228272	-	mm|12qA1.1	XM_003084890	chr12:11228331-11228272	GO:0008150|GO:0003674|GO:0005575	XM_003084890
A_51_P107991	6.5635967	P	5.786049	P	1.71421456480199	    22678	Zfp2	Mus musculus zinc finger protein 2 (Zfp2)	 transcript variant 3	 mRNA [NM_001044697]	zinc finger protein 2	Mm.259230	 50712219	chr11	 50712185	-	mm|11qB1.3	NM_001044697	chr11:50712219-50712185	GO:0005622|GO:0008150|GO:0003674|GO:0006355|GO:0008270|GO:0005634|GO:0005575|GO:0003676|GO:0003677|GO:0046872|GO:0006351	NM_001044697
A_51_P107998	6.59999	P	7.5486317	P	0.518120043316641	    80982	9930013L23Rik	RIKEN cDNA 9930013L23 gene [Source:MGI Symbol;Acc:MGI:2443629] [ENSMUST00000150495]	RIKEN cDNA 9930013L23 gene	Mm.160389	 91095651	chr7	 91095592	-	mm|7qD3	AK036809	chr7:91095651-91095592	GO:0008150|GO:0003674|GO:0005737
A_51_P108020	10.439918	P	11.363327	P	0.527261660141189	   574428	Zmynd15	Mus musculus zinc finger	 MYND-type containing 15 (Zmynd15)	 mRNA [NM_001029929]	zinc finger	 MYND-type containing 15	Mm.472771	 70279684	chr11	 70279625	+	mm|11qB3	NM_001029929	chr11:70279625-70279684	GO:0008150|GO:0003674|GO:0005575|GO:0046872	NM_001029929
A_51_P108031	2.1257377	A	2.1066432	A	1.01332327310031	   665270	Plb1	phospholipase B1 [Source:MGI Symbol;Acc:MGI:1922406] [ENSMUST00000129141]	phospholipase B1	Mm.160067	 32595706	chr5	 32595647	+	mm|5qB1	AK015993	chr5:32595647-32595706	GO:0016042|GO:0006629|GO:0016787|GO:0016020|GO:0005886|GO:0004622|GO:0004623|GO:0016788|GO:0050253|GO:0016021|GO:0016298|GO:0008202
A_51_P108038	2.3278897	A	2.6702452	A	0.788752457395881	    56544	Vmn2r1	Mus musculus vomeronasal 2	 receptor 1 (Vmn2r1)	 mRNA [NM_019918]	vomeronasal 2	 receptor 1	Mm.57069	 63908414	chr3	 63906978	+	mm|3qE1	NM_019918	chr3:63906978-63908414	GO:0005886|GO:0004930|GO:0019236|GO:0030425|GO:0003674|GO:0007165|GO:0008150|GO:0007186|GO:0016020|GO:0004872|GO:0004871|GO:0016021|GO:0005938	NM_019918
A_51_P108051	11.380512	P	11.434617	P	0.963191789933355	    23996	Psmc4	Mus musculus proteasome (prosome	 macropain) 26S subunit	 ATPase	 4 (Psmc4)	 mRNA [NM_011874]	proteasome (prosome	 macropain) 26S subunit	 ATPase	 4	Mm.29582	 28827713	chr7	 28827513	-	mm|7qA3	NM_011874	chr7:28827713-28827513	GO:0005739|GO:0005737|GO:0000502|GO:0000166|GO:0001824|GO:0051437|GO:0005634|GO:0051436|GO:0031145|GO:0005524	NM_011874
A_51_P108072	3.0254316	A	3.462573	A	0.738596637640205	    75343	4930557B06Rik	Mus musculus adult male testis cDNA	 RIKEN full-length enriched library	 clone:4930557B06 product:hypothetical protein	 full insert sequence. [AK016157]	RIKEN cDNA 4930557B06 gene		113571775	chr5	113571716	+	mm|5qF	AK016157	chr5:113571716-113571775	GO:0008150|GO:0003674|GO:0005575
A_51_P108108	9.766473	P	10.393639	P	0.647446998314955	   211228	Lrrc25	Mus musculus leucine rich repeat containing 25 (Lrrc25)	 mRNA [NM_153074]	leucine rich repeat containing 25	Mm.132939	 73144717	chr8	 73144658	+	mm|8qB3.3	NM_153074	chr8:73144658-73144717	GO:0008150|GO:0003674|GO:0016020|GO:0016021|GO:0005575	NM_153074
A_51_P108131	12.70173	P	12.547226	P	1.11303888855637	    75580	Zbtb4	Mus musculus zinc finger and BTB domain containing 4 (Zbtb4)	 mRNA [NM_029348]	zinc finger and BTB domain containing 4	Mm.426361	 69595414	chr11	 69595355	+	mm|11qB3	NM_029348	chr11:69595355-69595414	GO:0008150|GO:0003674|GO:0005634|GO:0005575|GO:0046872	NM_029348
A_51_P108173	9.881997	P	10.025916	P	0.905057275826265	NA					 88245643	chr4	 88245584	-	mm|4qC4		chr4:088245643-088245584
A_51_P108183	5.1299963	P	5.539207	P	0.753035247416306	    64103	Tnmd	Mus musculus tenomodulin (Tnmd)	 mRNA [NM_022322]	tenomodulin	Mm.46221	130397546	chrX	130397487	+	mm|XqE3	NM_022322	chrX:130397487-130397546	GO:0016020|GO:0001937|GO:0001886|GO:0016525|GO:0016021	NM_022322
A_51_P108190	12.337761	P	12.674938	P	0.791588742225131	    65019	Rpl23	Mus musculus ribosomal protein L23 (Rpl23)	 mRNA [NM_022891]	ribosomal protein L23	Mm.140380	 97638976	chr11	 97638917	-	mm|11qD	NM_022891	chr11:97638976-97638917	GO:0005515|GO:0005737|GO:0003735|GO:0022626|GO:0030529|GO:0005730|GO:0005840|GO:0006412|GO:0006414|GO:0005829	NM_022891
A_51_P108226	14.118726	P	12.125113	P	3.98233061702721	    66107	1100001G20Rik	Mus musculus RIKEN cDNA 1100001G20 gene (1100001G20Rik)	 mRNA [NM_183249]	RIKEN cDNA 1100001G20 gene	Mm.902	 83566087	chr11	 83566028	+	mm|11qC	NM_183249	chr11:83566028-83566087	GO:0050872|GO:0032496|GO:0034612|GO:0010577|GO:0043085|GO:0005615	NM_183249
A_51_P108228	3.9648318	P	2.1413999	A	3.53922112031773	    11441	Chrna7	Mus musculus cholinergic receptor	 nicotinic	 alpha polypeptide 7 (Chrna7)	 mRNA [NM_007390]	cholinergic receptor	 nicotinic	 alpha polypeptide 7	Mm.113464	 70244064	chr7	 70244005	-	mm|7qC	NM_007390	chr7:70244064-70244005	GO:0005515|GO:0030054|GO:0032715|GO:0032691|GO:0045202|GO:0042698|GO:0042221|GO:0042803|GO:0019228|GO:0034220|GO:0045211|GO:0001988|GO:0015464|GO:0043025|GO:0042166|GO:0006810|GO:0007613|GO:0008306|GO:0014061|GO:0019901|GO:0008179|GO:0014069|GO:0032720|GO:0007271|GO:0005892|GO:0006897|GO:0042734|GO:0042113|GO:0042110|GO:0032225|GO:0045121|GO:0005216|GO:0004889|GO:0009897|GO:0030424|GO:0008284|GO:0005230|GO:0005886|GO:0045471|GO:0032094|GO:0030425|GO:0030426|GO:0032279|GO:0000187|GO:0005737|GO:0016324|GO:0001540|GO:0043197|GO:0043198|GO:0008144|GO:0042391|GO:0006816|GO:0004872|GO:0006812|GO:0006811|GO:0001666|GO:0060112|GO:0050727|GO:0006874|GO:0005624|GO:0030317|GO:0045766|GO:0035095|GO:0007165|GO:0050890|GO:0016020|GO:0048149|GO:0050728|GO:0015643|GO:0016021|GO:0017081|GO:0035094	NM_007390
A_51_P108252	10.277094	P	10.176192	P	1.07244376492916	    76123	Gpsm2	Mus musculus G-protein signalling modulator 2 (AGS3-like	 C. elegans) (Gpsm2)	 mRNA [NM_029522]	G-protein signalling modulator 2 (AGS3-like	 C. elegans)	Mm.226941	108482281	chr3	108482222	-	mm|3qF3	NM_029522	chr3:108482281-108482222	GO:0007165|GO:0005737|GO:0005488|GO:0060487|GO:0000132|GO:0045177|GO:0005634|GO:0042802|GO:0005096	NM_029522
A_51_P108266	6.280097	P	7.6281652	P	0.392817688366598	    11472	Actn2	Mus musculus actinin alpha 2 (Actn2)	 mRNA [NM_033268]	actinin alpha 2	Mm.37638	 12367362	chr13	 12364990	-	mm|13qA1	NM_033268	chr13:12367362-12364990	GO:0005515|GO:0030018|GO:0030035|GO:0030175|GO:0015629|GO:0030017|GO:0042803|GO:0051374|GO:0005829|GO:0042802|GO:0030375|GO:0005737|GO:0006936|GO:0030374|GO:0051015|GO:0051289|GO:0048041|GO:0046983|GO:0030674|GO:0005509|GO:0005730|GO:0003779|GO:0031432|GO:0051370|GO:0005865|GO:0030864|GO:0005925|GO:0070080	NM_033268
A_51_P108269	11.8311	P	11.800126	P	1.02170166961796	    78100	8430410K20Rik	Mus musculus RIKEN cDNA 8430410K20 gene (8430410K20Rik)	 mRNA [NM_145609]	RIKEN cDNA 8430410K20 gene	Mm.206549	  4386652	chr9	  4386593	+	mm|9qA1	NM_145609	chr9:4386593-4386652	GO:0008150|GO:0003674|GO:0005634	NM_145609
A_51_P108309	7.6332374	P	2.413371	A	37.2680234218800	   258992	Olfr1494	Mus musculus olfactory receptor 1494 (Olfr1494)	 mRNA [NM_146990]	olfactory receptor 1494	Mm.391191	 13824538	chr19	 13824479	+	mm|19qA	NM_146990	chr19:13824479-13824538	GO:0007608|GO:0007165|GO:0004984|GO:0007186|GO:0004930|GO:0004872|GO:0016021|GO:0004871	NM_146990
A_51_P108334	15.492107	P	15.396683	P	1.06837935262600	    11739	Slc25a4	Mus musculus solute carrier family 25 (mitochondrial carrier	 adenine nucleotide translocator)	 member 4 (Slc25a4)	 nuclear gene encoding mitochondrial protein	 mRNA [NM_007450]	solute carrier family 25 (mitochondrial carrier	 adenine nucleotide translocator)	 member 4	Mm.16228	 47292887	chr8	 47292828	-	mm|8qB1.1	NM_007450	chr8:47292887-47292828	GO:0005515|GO:0005215|GO:0005743|GO:0005741|GO:0055085|GO:0005739|GO:0008637|GO:0016020|GO:0005488|GO:0006810|GO:0015866|GO:0060547|GO:0015867|GO:0016021|GO:0019899|GO:0005471	NM_007450
A_51_P108384	4.327475	P	2.979001	A	2.54642636600172	    68271	4930441O14Rik	Mus musculus RIKEN cDNA 4930441O14 gene (4930441O14Rik)	 non-coding RNA [NR_027969]	RIKEN cDNA 4930441O14 gene	Mm.145530	 67857170	chr13	 67857112	+	mm|13qB3	NR_027969	chr13:67857112-67857170	GO:0008150|GO:0003674|GO:0005575	NR_027969
A_51_P108408	10.136393	P	9.560533	P	1.49056573437938	    12183	Bpgm	Mus musculus 2	3-bisphosphoglycerate mutase (Bpgm)	 mRNA [NM_007563]	2	3-bisphosphoglycerate mutase	Mm.282863	 34454291	chr6	 34437912	+	mm|6qB1	NM_007563	chr6:34437912-34454291	GO:0003674|GO:0016787|GO:0004082|GO:0004083|GO:0048821|GO:0008152|GO:0016868|GO:0005575|GO:0016853|GO:0004619|GO:0003824|GO:0006096	NM_007563
A_51_P108428	5.7303762	P	5.8604994	P	0.913753416255126	    14601	Ghrh	Mus musculus growth hormone releasing hormone (Ghrh)	 mRNA [NM_010285]	growth hormone releasing hormone	Mm.389327	157155312	chr2	157155253	-	mm|2qH1	NM_010285	chr2:157155312-157155253	GO:0021984|GO:0043005|GO:0060124|GO:0008284|GO:0030819|GO:0007204|GO:0005615|GO:0032094|GO:0043195|GO:0046887|GO:0030816|GO:0043204|GO:0030252|GO:0010667|GO:0043679|GO:0040018|GO:0046010|GO:0005576|GO:0031770|GO:0005179|GO:0016608|GO:0019933|GO:0007188|GO:0007189|GO:0045893	NM_010285
A_51_P108432	3.3146317	A	5.1162987	P	0.286842956936895	NA		Mouse growth hormone-releasing hormone mRNA	 complete cds. [M31654]			157159604	chr2	157159545	-	mm|2qH1	M31654	chr2:157159604-157159545
A_51_P108459	10.029249	P	11.100098	P	0.476038776346685	    14744	Gpr65	Mus musculus G-protein coupled receptor 65 (Gpr65)	 mRNA [NM_008152]	G-protein coupled receptor 65	Mm.378924	 99514786	chr12	 99514727	+	mm|12qE	NM_008152	chr12:99514727-99514786	GO:0005886|GO:0031532|GO:0004930|GO:0010447|GO:0030819|GO:0006915|GO:0032862|GO:0007165|GO:0007186|GO:0016020|GO:0051496|GO:0004872|GO:0004871|GO:0016021	NM_008152
A_51_P108478	12.520902	P	12.542853	P	0.98489989367612	    68735	Mrps18c	Mus musculus mitochondrial ribosomal protein S18C (Mrps18c)	 nuclear gene encoding mitochondrial protein	 mRNA [NM_026826]	mitochondrial ribosomal protein S18C	Mm.25585	101233470	chr5	101233411	+	mm|5qE4	NM_026826	chr5:101233411-101233470	GO:0005739|GO:0005622|GO:0008150|GO:0003674|GO:0003735|GO:0030529|GO:0005840|GO:0006412|GO:0005763	NM_026826
A_51_P108484	12.634464	P	12.282911	P	1.27593337647731	    68735	Mrps18c	Mus musculus mitochondrial ribosomal protein S18C (Mrps18c)	 nuclear gene encoding mitochondrial protein	 mRNA [NM_026826]	mitochondrial ribosomal protein S18C	Mm.25585	101233036	chr5	101232118	+	mm|5qE4	NM_026826	chr5:101232118-101233036	GO:0005739|GO:0005622|GO:0008150|GO:0003674|GO:0003735|GO:0030529|GO:0005840|GO:0006412|GO:0005763	NM_026826
A_51_P108489	14.046943	P	13.6467085	P	1.31972240499730	    14894	Gtl3	Mus musculus gene trap locus 3 (Gtl3)	 mRNA [NM_008187]	gene trap locus 3	Mm.2080	 97945043	chr8	 97944518	-	mm|8qD1	NM_008187	chr8:97945043-97944518		NM_008187
A_51_P108525	9.0040865	P	9.260922	P	0.836921665320457	    83435	Plekha3	Mus musculus pleckstrin homology domain-containing	 family A (phosphoinositide binding specific) member 3 (Plekha3)	 mRNA [NM_031256]	pleckstrin homology domain-containing	 family A (phosphoinositide binding specific) member 3	Mm.41636	 76533674	chr2	 76533615	+	mm|2qC3	NM_031256	chr2:76533615-76533674	GO:0005545|GO:0005737|GO:0005543|GO:0016020|GO:0008289	NM_031256
A_51_P108555	5.4214478	P	3.6064968	A	3.51847679936893	   258293	Olfr437	Mus musculus olfactory receptor 437 (Olfr437)	 mRNA [NM_146296]	olfactory receptor 437	Mm.222993	 43117679	chr6	 43117620	+	mm|6qB2.1	NM_146296	chr6:43117620-43117679	GO:0007608|GO:0007165|GO:0004984|GO:0007186|GO:0004930|GO:0004872|GO:0016021|GO:0004871	NM_146296
A_51_P108573	7.9676113	P	8.2469015	P	0.823996320341161	    96957	Tmem62	Mus musculus transmembrane protein 62 (Tmem62)	 mRNA [NM_175285]	transmembrane protein 62	Mm.315212	120832899	chr2	120832840	+	mm|2qE5	NM_175285	chr2:120832840-120832899	GO:0008150|GO:0003674|GO:0016020|GO:0016021|GO:0005575	NM_175285
A_51_P108581	11.955051	P	12.410739	P	0.729162362411072	   320129	Adrbk2	Mus musculus adrenergic receptor kinase	 beta 2 (Adrbk2)	 transcript variant 1	 mRNA [NM_177078]	adrenergic receptor kinase	 beta 2	Mm.285619	113339722	chr5	113339663	-	mm|5qF	NM_177078	chr5:113339722-113339663	GO:0030424|GO:0045202|GO:0005634|GO:0005524|GO:0007165|GO:0016310|GO:0004672|GO:0004703|GO:0043197|GO:0000166|GO:0043198|GO:0004674|GO:0016301|GO:0047696|GO:0006468|GO:0004871|GO:0016740|GO:0016772	NM_177078
A_51_P108606	2.0536618	A	2.024817	A	1.02019490440665	NA		Mus musculus 15 days embryo head cDNA	 RIKEN full-length enriched library	 clone:D930008C23 product:unclassifiable	 full insert sequence. [AK086147]			102901514	chr3	102901455	+	mm|3qF2.2	AK086147	chr3:102901455-102901514
A_51_P108629	5.4848065	P	6.0065417	P	0.696533574117465	    18776	Prl3b1	Mus musculus prolactin family 3	 subfamily b	 member 1 (Prl3b1)	 mRNA [NM_008865]	prolactin family 3	 subfamily b	 member 1	Mm.37203	 27341444	chr13	 27341385	+	mm|13qA3.1	NM_008865	chr13:27341385-27341444	GO:0005179|GO:0005576|GO:0005615	NM_008865
A_51_P108645	7.803803	P	6.1842093	P	3.07288483736299	    16443	Itsn1	Mus musculus intersectin 1 (SH3 domain protein 1A) (Itsn1)	 transcript variant 1	 mRNA [NM_010587]	intersectin 1 (SH3 domain protein 1A)	Mm.40546	 91912124	chr16	 91909583	+	mm|16qC4	NM_010587	chr16:91909583-91912124	GO:0005515|GO:0051897|GO:0008624|GO:0030054|GO:0005886|GO:0007264|GO:0035023|GO:0045202|GO:0030139|GO:0042995|GO:0005829|GO:0005622|GO:0005085|GO:0035556|GO:0043524|GO:0005089|GO:0019717|GO:0070064|GO:0005509|GO:0006915|GO:0043085|GO:0030027|GO:0006897|GO:0005905|GO:0019209|GO:0032947|GO:0016020|GO:0042327	NM_010587
A_51_P108659	14.944942	P	14.280962	P	1.58444765658917	    18979	Pon1	Mus musculus paraoxonase 1 (Pon1)	 mRNA [NM_011134]	paraoxonase 1	Mm.237657	  5118225	chr6	  5118166	-	mm|6qA1	NM_011134	chr6:5118225-5118166	GO:0008035|GO:0005792|GO:0019439|GO:0008015|GO:0005509|GO:0034366|GO:0051099|GO:0032411|GO:0009636|GO:0005576|GO:0046434|GO:0005615|GO:0046872|GO:0042803|GO:0010875|GO:0005543|GO:0004063|GO:0016787|GO:0034364|GO:0046470|GO:0004064|GO:0046395|GO:0008203	NM_011134
A_51_P108701	14.139597	P	14.105142	P	1.02416985420219	    19181	Psmc2	Mus musculus proteasome (prosome	 macropain) 26S subunit	 ATPase 2 (Psmc2)	 mRNA [NM_011188]	proteasome (prosome	 macropain) 26S subunit	 ATPase 2	Mm.2462	 21309205	chr5	 21309053	+	mm|5qA3	NM_011188	chr5:21309053-21309205	GO:0005515|GO:0006511|GO:0000502|GO:0006200|GO:0051437|GO:0005634|GO:0051436|GO:0005524|GO:0031145|GO:0005739|GO:0005737|GO:0000166|GO:0016887	NM_011188
A_51_P108723	11.176542	P	10.886378	P	1.22277927061646	    98258	Txndc9	Mus musculus thioredoxin domain containing 9 (Txndc9)	 mRNA [NM_172054]	thioredoxin domain containing 9	Mm.28438	 38044035	chr1	 38043976	-	mm|1qB	NM_172054	chr1:38044035-38043976	GO:0008150|GO:0003674|GO:0045454|GO:0005575	NM_172054
A_51_P108731	8.637145	P	8.694618	P	0.96094582236871	   245841	Polr2h	Mus musculus polymerase (RNA) II (DNA directed) polypeptide H (Polr2h)	 mRNA [NM_145632]	polymerase (RNA) II (DNA directed) polypeptide H	Mm.288730	 20719136	chr16	 20719077	+	mm|16qB1	NM_145632	chr16:20719077-20719136	GO:0008380|GO:0003674|GO:0006368|GO:0006367|GO:0006366|GO:0003899|GO:0005665|GO:0006468|GO:0005654|GO:0005634|GO:0006351	NM_145632
A_51_P108741	2.081243	A	2.1217947	A	0.97228306622512	   231045	4931409K22Rik	Mus musculus RIKEN cDNA 4931409K22 gene (4931409K22Rik)	 transcript variant 1	 mRNA [NM_177676]	RIKEN cDNA 4931409K22 gene	Mm.255800	 24049954	chr5	 24049414	-	mm|5qA3	NM_177676	chr5:24049954-24049414	GO:0008150|GO:0003674|GO:0000166|GO:0005575|GO:0005524	NM_177676
A_51_P108757	12.917018	P	13.255878	P	0.790665839572908	    71665	Fuca1	Mus musculus fucosidase	 alpha-L- 1	 tissue (Fuca1)	 mRNA [NM_024243]	fucosidase	 alpha-L- 1	 tissue	Mm.439940	135489010	chr4	135488951	+	mm|4qD3	NM_024243	chr4:135488951-135489010	GO:0016787|GO:0043169|GO:0005975|GO:0004560|GO:0016798|GO:0015928|GO:0008152|GO:0005529|GO:0005625|GO:0006004|GO:0003824|GO:0005764	NM_024243
A_51_P108767	6.045416	P	5.862426	P	1.13523423327471	    19366	Rad54l	Mus musculus RAD54 like (S. cerevisiae) (Rad54l)	 transcript variant 1	 mRNA [NM_009015]	RAD54 like (S. cerevisiae)	Mm.3655	115771165	chr4	115771106	-	mm|4qD1	NM_009015	chr4:115771165-115771106	GO:0051276|GO:0016817|GO:0042493|GO:0004386|GO:0005634|GO:0003676|GO:0003677|GO:0005524|GO:0006974|GO:0006302|GO:0006281|GO:0000166|GO:0016787|GO:0000724|GO:0010212	NM_009015
A_51_P108778	10.100092	P	9.984792	P	1.08320026727171	    19671	Rce1	Mus musculus RCE1 homolog	 prenyl protein peptidase (S. cerevisiae) (Rce1)	 mRNA [NM_023131]	RCE1 homolog	 prenyl protein peptidase (S. cerevisiae)	Mm.391143	  4622641	chr19	  4622582	-	mm|19qA	NM_023131	chr19:4622641-4622582	GO:0016787|GO:0016020|GO:0005783|GO:0016021	NM_023131
A_51_P108779	12.847668	P	12.876766	P	0.980032840994693	    19671	Rce1	Mus musculus RCE1 homolog	 prenyl protein peptidase (S. cerevisiae) (Rce1)	 mRNA [NM_023131]	RCE1 homolog	 prenyl protein peptidase (S. cerevisiae)	Mm.391143	  4622691	chr19	  4622632	-	mm|19qA	NM_023131	chr19:4622691-4622632	GO:0016787|GO:0016020|GO:0005783|GO:0016021	NM_023131
A_51_P108788	12.515236	P	13.841437	P	0.398817051811741	   228802	BC018465	Mus musculus cDNA sequence BC018465 (BC018465)	 mRNA [NM_144890]	cDNA sequence BC018465	Mm.167411	154066530	chr2	154064627	+	mm|2qH1	NM_144890	chr2:154064627-154066530	GO:0008150|GO:0003674|GO:0005575	NM_144890
A_51_P108853	6.895073	P	6.452022	P	1.35947629923266	   226791	Lyplal1	Mus musculus lysophospholipase-like 1 (Lyplal1)	 mRNA [NM_146106]	lysophospholipase-like 1	Mm.257116	187912372	chr1	187912313	-	mm|1qH5	NM_146106	chr1:187912372-187912313	GO:0008150|GO:0003674|GO:0005737|GO:0016787|GO:0005575	NM_146106
A_51_P108862	14.47351	P	14.408851	P	1.04583771303945	    26894	Cops7a	Mus musculus COP9 (constitutive photomorphogenic) homolog	 subunit 7a (Arabidopsis thaliana) (Cops7a)	 transcript variant 1	 mRNA [NM_012003]	COP9 (constitutive photomorphogenic) homolog	 subunit 7a (Arabidopsis thaliana)	Mm.244536	124908990	chr6	124908931	-	mm|6qF2	NM_012003	chr6:124908990-124908931	GO:0003674|GO:0005737|GO:0008180|GO:0010388|GO:0005634	NM_012003
A_51_P108891	10.270462	P	10.510071	P	0.846974828841197	    27275	Nufip1	Mus musculus nuclear fragile X mental retardation protein interacting protein 1 (Nufip1)	 mRNA [NM_013745]	nuclear fragile X mental retardation protein interacting protein 1	Mm.21138	 76534826	chr14	 76534767	+	mm|14qD3	NM_013745	chr14:76534767-76534826	GO:0005515|GO:0048786|GO:0003723|GO:0070761|GO:0005730|GO:0000492|GO:0005634|GO:0015629|GO:0008023|GO:0046872|GO:0016363|GO:0042802|GO:0005622|GO:0005726|GO:0022626|GO:0045944|GO:0008270|GO:0030674	NM_013745
A_51_P108901	11.4914	P	11.7929535	P	0.811378230346312	   108673	Ccdc86	Mus musculus coiled-coil domain containing 86 (Ccdc86)	 mRNA [NM_023731]	coiled-coil domain containing 86	Mm.294908	 11017568	chr19	 11017509	-	mm|19qA	NM_023731	chr19:11017568-11017509	GO:0005634	NM_023731
A_51_P108923	8.602174	P	9.591382	P	0.503754246395601	NA		Mus musculus 12 days embryo embryonic body between diaphragm region and neck cDNA	 RIKEN full-length enriched library	 clone:9430078N17 product:unclassifiable	 full insert sequence. [AK035046]			 52424882	chr16	 52424823	-	mm|16qB5	AK035046	chr16:52424882-52424823
A_51_P108935	9.937309	P	10.028929	P	0.938468352692507	   381314	Iars2	Mus musculus isoleucine-tRNA synthetase 2	 mitochondrial (Iars2)	 nuclear gene encoding mitochondrial protein	 mRNA [NM_198653]	isoleucine-tRNA synthetase 2	 mitochondrial	Mm.331142	187111948	chr1	187111041	-	mm|1qH5	NM_198653	chr1:187111948-187111041	GO:0005739|GO:0005737|GO:0000166|GO:0016874|GO:0005759|GO:0006428|GO:0003824|GO:0006412|GO:0005524|GO:0004822|GO:0004812|GO:0006418	NM_198653
A_51_P108948	11.067918	P	10.712419	P	1.27942803389044	    74287	Kcmf1	Mus musculus potassium channel modulatory factor 1 (Kcmf1)	 mRNA [NM_019715]	potassium channel modulatory factor 1	Mm.29194	 72791198	chr6	 72791139	-	mm|6qC1	NM_019715	chr6:72791198-72791139	GO:0005622|GO:0004842|GO:0016567|GO:0016874|GO:0008270|GO:0005575|GO:0046872	NM_019715
A_51_P108973	3.2251723	A	3.7581697	A	0.691117348782878	    74359	4931414P19Rik	Mus musculus RIKEN cDNA 4931414P19 gene (4931414P19Rik)	 mRNA [NM_028890]	RIKEN cDNA 4931414P19 gene	Mm.79815	 55203053	chr14	 55202994	-	mm|14qC3	NM_028890	chr14:55203053-55202994	GO:0008150|GO:0003674|GO:0005576|GO:0005575	NM_028890
A_51_P108978	8.593641	P	9.2437315	P	0.637240338434199	    50918	Myadm	Mus musculus myeloid-associated differentiation marker (Myadm)	 transcript variant 4	 mRNA [NM_016969]	myeloid-associated differentiation marker	Mm.29874	  3298492	chr7	  3298433	+	mm|7qA1	NM_016969	chr7:3298433-3298492	GO:0016020|GO:0016021	NM_016969
A_51_P108990	11.136561	P	11.396024	P	0.835398813740726	   207175	Cetn4	Mus musculus centrin 4 (Cetn4)	 mRNA [NM_145825]	centrin 4	Mm.344708	 37207802	chr3	 37207743	-	mm|3qB	NM_145825	chr3:37207802-37207743	GO:0008150|GO:0005814|GO:0005509|GO:0005932|GO:0031683	NM_145825
A_51_P109050	10.072816	P	10.741371	P	0.629136513461744	    76498	Paqr4	Mus musculus progestin and adipoQ receptor family member IV (Paqr4)	 mRNA [NM_023824]	progestin and adipoQ receptor family member IV	Mm.482515	 23873842	chr17	 23873783	-	mm|17qA3.3	NM_023824	chr17:23873842-23873783	GO:0008150|GO:0003674|GO:0016020|GO:0004872|GO:0016021|GO:0005575	NM_023824
A_51_P109060	2.0076652	A	1.9819893	A	1.01795649116698	    54611	Pde3a	Mus musculus phosphodiesterase 3A	 cGMP inhibited (Pde3a)	 mRNA [NM_018779]	phosphodiesterase 3A	 cGMP inhibited	Mm.485878	141447817	chr6	141447758	+	mm|6qG2	NM_018779	chr6:141447758-141447817	GO:0043066|GO:0008081|GO:0004115|GO:0004119|GO:0004114|GO:0042493|GO:0047555|GO:0005625|GO:0001556|GO:0005626|GO:0003824|GO:0046872|GO:0005829|GO:0040020|GO:0007165|GO:0030552|GO:0016787|GO:0016020|GO:0060282|GO:0008152|GO:0016021|GO:0006198	NM_018779
A_51_P109097	1.9439367	A	1.8706329	A	1.05212331002003	   258832	Olfr109	Mus musculus olfactory receptor 109 (Olfr109)	 mRNA [NM_146835]	olfactory receptor 109	Mm.377712	 37603309	chr17	 37603250	+	mm|17qB1	NM_146835	chr17:37603250-37603309	GO:0007608|GO:0007165|GO:0004984|GO:0007186|GO:0004930|GO:0004872|GO:0016021|GO:0004871	NM_146835
A_51_P109099	8.945788	P	10.929951	P	0.252759461079736	    56222	Cited4	Mus musculus Cbp/p300-interacting transactivator	 with Glu/Asp-rich carboxy-terminal domain	 4 (Cited4)	 mRNA [NM_019563]	Cbp/p300-interacting transactivator	 with Glu/Asp-rich carboxy-terminal domain	 4	Mm.272646	120340194	chr4	120340136	+	mm|4qD2.2	NM_019563	chr4:120340136-120340194	GO:0043627|GO:0006355|GO:0005737|GO:0003713|GO:0005634|GO:0045893|GO:0006351	NM_019563
A_51_P109119	4.1648865	P	4.6374197	P	0.720698026546484	    66748	4933404M02Rik	Mus musculus adult male testis cDNA	 RIKEN full-length enriched library	 clone:4933439B05 product:hypothetical protein	 full insert sequence. [AK017113]	RIKEN cDNA 4933404M02 gene	Mm.423014	 70374530	chr2	 70374470	+	mm|2qC2	AK017113	chr2:70374470-70374530	GO:0008150|GO:0003674|GO:0005575
A_51_P109131	3.0052118	A	3.502759	A	0.708309992304408	NA		Mus musculus 16 days embryo head cDNA	 RIKEN full-length enriched library	 clone:C130099L17 product:unclassifiable	 full insert sequence. [AK082067]			 99688947	chrX	 99688888	-	mm|XqD	AK082067	chrX:99688947-99688888
A_51_P109144	9.592527	P	9.253325	P	1.26505665778620	    66790	Grtp1	Mus musculus GH regulated TBC protein 1 (Grtp1)	 mRNA [NM_025768]	GH regulated TBC protein 1	Mm.34901	 13179373	chr8	 13177134	-	mm|8qA1.1	NM_025768	chr8:13179373-13177134	GO:0005622|GO:0032313|GO:0005097|GO:0005096	NM_025768
A_51_P109171	14.638375	P	14.690061	P	0.964808150505437	   216440	Os9	Mus musculus amplified in osteosarcoma (Os9)	 transcript variant 2	 mRNA [NM_177614]	amplified in osteosarcoma	Mm.295246	126532833	chr10	126532774	-	mm|10qD3	NM_177614	chr10:126532833-126532774	GO:0034976|GO:0016567|GO:0001948|GO:0042787|GO:0005783|GO:0005529|GO:0005788|GO:0006621|GO:0030433	NM_177614
A_51_P109258	9.095472	P	9.92417	P	0.563037141550692	    12879	Cys1	Mus musculus cystin 1 (Cys1)	 transcript variant 1	 mRNA [NM_138686]	cystin 1	Mm.52265	 25350779	chr12	 25350720	-	mm|12qA1.3	NM_138686	chr12:25350779-25350720	GO:0008150|GO:0005929|GO:0003674|GO:0005737|GO:0042995|GO:0005932|GO:0035085|GO:0005856	NM_138686
A_51_P109274	2.0508566	A	2.0286283	A	1.01552679070097	   171236	Vmn1r233	Mus musculus vomeronasal 1 receptor 233 (Vmn1r233)	 mRNA [NM_134202]	vomeronasal 1 receptor 233	Mm.377192	 21131260	chr17	 21131201	-	mm|17qA3.2	NM_134202	chr17:21131260-21131201	GO:0005550|GO:0016503|GO:0007186|GO:0005887|GO:0004872|GO:0019236	NM_134202
A_51_P109295	7.9185905	P	7.952744	P	0.97660461456634	    93874	Pcdhb3	Mus musculus protocadherin beta 3 (Pcdhb3)	 mRNA [NM_053128]	protocadherin beta 3	Mm.82308	 37463423	chr18	 37463364	+	mm|18qB3	NM_053128	chr18:37463364-37463423	GO:0016020|GO:0005886|GO:0016021|GO:0007155	NM_053128
A_51_P109298	5.176608	P	1.9856002	A	9.13248703211029	   258996	Olfr201	Mus musculus olfactory receptor 201 (Olfr201)	 mRNA [NM_146994]	olfactory receptor 201	Mm.377782	 59268643	chr16	 59268584	-	mm|16qC1.3	NM_146994	chr16:59268643-59268584	GO:0007608|GO:0007165|GO:0004984|GO:0007186|GO:0004930|GO:0004872|GO:0016021|GO:0004871	NM_146994
A_51_P109326	2.2468371	A	2.7333841	A	0.713731326226037	    94216	Col4a6	Mus musculus collagen	 type IV	 alpha 6 (Col4a6)	 mRNA [NM_053185]	collagen	 type IV	 alpha 6	Mm.155586	137600875	chrX	137600816	-	mm|XqF1	NM_053185	chrX:137600875-137600816	GO:0005581|GO:0071230|GO:0030198|GO:0005198|GO:0005587|GO:0005604	NM_053185
A_51_P109335	13.675656	P	13.584447	P	1.06526251441086	    12847	Copa	Mus musculus coatomer protein complex subunit alpha (Copa)	 mRNA [NM_009938]	coatomer protein complex subunit alpha	Mm.30041	174052317	chr1	174052258	+	mm|1qH3	NM_009938	chr1:174052258-174052317	GO:0005792|GO:0030126|GO:0005737|GO:0006890|GO:0005625|GO:0030157|GO:0005615|GO:0048205|GO:0016044|GO:0005829	NM_009938
A_51_P109357	2.4606051	A	2.04852	A	1.33060752707927	   259031	Olfr1120	Mus musculus olfactory receptor 1120 (Olfr1120)	 mRNA [NM_147029]	olfactory receptor 1120	Mm.223414	 87197781	chr2	 87197722	+	mm|2qD	NM_147029	chr2:87197722-87197781	GO:0007608|GO:0007165|GO:0004984|GO:0007186|GO:0004930|GO:0004872|GO:0016021|GO:0004871	NM_147029
A_51_P109364	10.361859	P	10.042064	P	1.24815317975948	    21951	Tnks	Mus musculus 12 days embryo spinal ganglion cDNA	 RIKEN full-length enriched library	 clone:D130072O21 product:hypothetical protein	 full insert sequence. [AK083986]	tankyrase	 TRF1-interacting ankyrin-related ADP-ribose polymerase	Mm.88364	 35890166	chr8	 35890107	-	mm|8qA4	AK083986	chr8:35890166-35890107	GO:0090263|GO:0005634|GO:0015031|GO:0003950|GO:0006471|GO:0032212|GO:0005737|GO:0018105|GO:0005643|GO:0018107|GO:0006810|GO:0016055|GO:0070198|GO:0000784|GO:0000209|GO:0005792|GO:0000781|GO:0005794|GO:0005694|GO:0016757|GO:0055085|GO:0043392|GO:0070213|GO:0070212|GO:0016020|GO:0008152|GO:0008270|GO:0051028|GO:0000775|GO:0016740
A_51_P109369	10.691069	P	10.829813	P	0.908309579031686	    67731	Fbxo32	Mus musculus F-box protein 32 (Fbxo32)	 mRNA [NM_026346]	F-box protein 32	Mm.292042	 58011811	chr15	 58011752	-	mm|15qD1	NM_026346	chr15:58011811-58011752	GO:0014889|GO:0005634	NM_026346
A_51_P109412	2.2227712	A	2.209962	A	1.00891819308572	    16704	Krtap8-2	Mus musculus keratin associated protein 8-2 (Krtap8-2)	 mRNA [NM_010676]	keratin associated protein 8-2	Mm.3503	 88896221	chr16	 88896213	-	mm|16qC3.3	NM_010676	chr16:88896221-88896213	GO:0005882|GO:0008150|GO:0003674|GO:0005575	NM_010676
A_51_P109421	10.047799	P	10.278534	P	0.852200616319636	    16865	Eif2d	Mus musculus eukaryotic translation initiation factor 2D (Eif2d)	 transcript variant 2	 mRNA [NM_010709]	eukaryotic translation initiation factor 2D	Mm.276294	133067556	chr1	133064801	+	mm|1qE4	NM_010709	chr1:133064801-133067556	GO:0005737|GO:0003723|GO:0003743|GO:0006412|GO:0006413	NM_010709
A_51_P109439	4.9926996	P	4.307159	P	1.60830452500652	   258322	Olfr554	Mus musculus olfactory receptor 554 (Olfr554)	 mRNA [NM_146325]	olfactory receptor 554	Mm.377435	109789572	chr7	109789513	+	mm|7qE3	NM_146325	chr7:109789513-109789572	GO:0007608|GO:0004984|GO:0007186|GO:0016021	NM_146325
A_51_P109449	11.402881	P	10.737882	P	1.58556717418877	    16995	Ltb4r1	Mus musculus leukotriene B4 receptor 1 (Ltb4r1)	 mRNA [NM_008519]	leukotriene B4 receptor 1	Mm.20853	 56387234	chr14	 56387175	+	mm|14qC3	NM_008519	chr14:56387175-56387234	GO:0007165|GO:0016020|GO:0007186|GO:0005886|GO:0004930|GO:0001632|GO:0004872|GO:0016021|GO:0004871|GO:0004974	NM_008519
A_51_P109469	9.068266	P	9.266031	P	0.871900251442857	    14182	Fgfr1	Mouse basic fibroblast growth factor receptor (bFGF-R) mRNA	 complete cds. [M28998]	fibroblast growth factor receptor 1	Mm.265716	 26684101	chr8	 26684042	+	mm|8qA2	M28998	chr8:26684042-26684101	GO:0060045|GO:0010468|GO:0005515|GO:0001657|GO:0007605|GO:0001759|GO:0032403|GO:0031175|GO:0042803|GO:0001948|GO:0000166|GO:0002062|GO:0016301|GO:0042127|GO:0050839|GO:0016772|GO:0048339|GO:0042472|GO:0017134|GO:0000122|GO:0021837|GO:0045787|GO:0001701|GO:0016310|GO:0008543|GO:0007420|GO:0072091|GO:0010976|GO:0060484|GO:0060445|GO:0051930|GO:0008284|GO:0021847|GO:0005886|GO:0030324|GO:0048699|GO:0048514|GO:0030326|GO:0048378|GO:0060665|GO:0045944|GO:0048469|GO:0004872|GO:0042474|GO:0042473|GO:0008201|GO:0007435|GO:0005007|GO:0043066|GO:0048762|GO:0021954|GO:0002053|GO:0001525|GO:0005524|GO:0035607|GO:0060117|GO:0045668|GO:0004672|GO:0016020|GO:0019827|GO:0010629|GO:0030901|GO:0004713|GO:0016021|GO:0004714|GO:0090080|GO:0016740|GO:0021769
A_51_P109496	8.0933	P	8.277937	P	0.87987043440804	   666532	Gm13139	Mus musculus predicted gene 13139 (Gm13139)	 mRNA [NM_001083918]	predicted gene 13139	Mm.392861	146554581	chr4	146554522	+	mm|4qE1	NM_001083918	chr4:146554522-146554581	GO:0008150|GO:0003674|GO:0005575|GO:0046872	NM_001083918
A_51_P109508	8.657522	P	9.96865	P	0.403005658354071	   171285	Havcr2	Mus musculus hepatitis A virus cellular receptor 2 (Havcr2)	 mRNA [NM_134250]	hepatitis A virus cellular receptor 2	Mm.72168	 46294709	chr11	 46294650	+	mm|11qB1.1	NM_134250	chr11:46294650-46294709	GO:0016020|GO:0016021	NM_134250
A_51_P109541	10.192663	P	9.885945	P	1.23689068312067	   230259	E130308A19Rik	Mus musculus RIKEN cDNA E130308A19 gene (E130308A19Rik)	 transcript variant 2	 mRNA [NM_001015681]	RIKEN cDNA E130308A19 gene	Mm.45688	 59766072	chr4	 59766013	+	mm|4qB3	NM_001015681	chr4:59766013-59766072	GO:0008150|GO:0003674|GO:0005575	NM_001015681
A_51_P109548	7.090851	P	7.065905	P	1.01744160860371	    70311	2510042O18Rik	Mus musculus 13 days embryo liver cDNA	 RIKEN full-length enriched library	 clone:2510042O18 product:unclassifiable	 full insert sequence. [AK011095]	RIKEN cDNA 2510042O18 gene		 58979654	chr10	 58979595	-	mm|10qB4	AK011095	chr10:58979654-58979595	GO:0008150|GO:0003674|GO:0005575
A_51_P109649	5.627604	P	6.138455	P	0.70180834129122	    17263	Meg3	Mus musculus maternally expressed 3 (Meg3)	 transcript variant 1	 non-coding RNA [NR_003633]	maternally expressed 3	Mm.289645	110800957	chr12	110800898	+	mm|12qF1	NR_003633	chr12:110800898-110800957	GO:0008285|GO:0034337|GO:0048286|GO:0003713|GO:0005634|GO:0009791|GO:0001701|GO:0008340|GO:0001889|GO:0005737|GO:0035264|GO:0032274|GO:2000279|GO:0045893|GO:0045892	NR_003633
A_51_P109668	12.489121	P	12.028058	P	1.37655571208800	    72475	Ssbp3	Mus musculus single-stranded DNA binding protein 3 (Ssbp3)	 transcript variant 1	 mRNA [NM_023672]	single-stranded DNA binding protein 3	Mm.195635	106722212	chr4	106722153	+	mm|4qC7	NM_023672	chr4:106722153-106722212	GO:2000744|GO:0021501|GO:0006355|GO:0008284|GO:0043066|GO:0021547|GO:0005634|GO:0003677|GO:0006351|GO:0043234|GO:0006461|GO:0003697|GO:0060323|GO:0045944|GO:0060322|GO:0045893	NM_023672
A_51_P109692	5.332945	P	3.6997995	A	3.10188564382189	    18332	Olfr33	Mus musculus olfactory receptor 33 (Olfr33)	 mRNA [NM_147073]	olfactory receptor 33	Mm.222837	109862290	chr7	109862231	-	mm|7qE3	NM_147073	chr7:109862290-109862231	GO:0007608|GO:0007165|GO:0004984|GO:0007186|GO:0004930|GO:0004872|GO:0016021|GO:0004871	NM_147073
A_51_P109699	1.96518	A	1.98231	A	0.988196601949201	NA		Mus musculus B6-derived CD11 +ve dendritic cells cDNA	 RIKEN full-length enriched library	 clone:F730042I04 product:unclassifiable	 full insert sequence. [AK089510]		Mm.278554	107663524	chr7	107663465	+	mm|7qE3	AK089510	chr7:107663465-107663524
A_51_P109708	2.8714945	A	2.0695395	A	1.74346209681334	   668035	Olfr687	PREDICTED: Mus musculus olfactory receptor 687 (Olfr687)	 mRNA [XM_001475533]	olfactory receptor 687		112424076	chr7	112424017	+	mm|7qE3	XM_001475533	chr7:112424017-112424076	GO:0007608|GO:0004984|GO:0007186|GO:0016021	XM_001475533
A_51_P109741	10.517174	P	11.214684	P	0.616635562578188	    72774	Neil1	nei endonuclease VIII-like 1 (E. coli) [Source:MGI Symbol;Acc:MGI:1920024] [ENSMUST00000098692]	nei endonuclease VIII-like 1 (E. coli)	Mm.35749	 56991050	chr9	 56990991	-	mm|9qB	AK155405	chr9:56991050-56990991	GO:0003906|GO:0005634|GO:0003676|GO:0003824|GO:0008022|GO:0003677|GO:0016829|GO:0016799|GO:0006974|GO:0032074|GO:0003684|GO:0019104|GO:0005737|GO:0006281|GO:0016787|GO:0016798|GO:0006284|GO:0008152|GO:0008270|GO:0006289|GO:0006979
A_51_P109742	7.9866767	P	8.747434	P	0.590186448507219	    72774	Neil1	Mus musculus nei endonuclease VIII-like 1 (E. coli) (Neil1)	 mRNA [NM_028347]	nei endonuclease VIII-like 1 (E. coli)	Mm.35749	 56991091	chr9	 56991063	-	mm|9qB	NM_028347	chr9:56991091-56991063	GO:0003906|GO:0005634|GO:0003676|GO:0003824|GO:0008022|GO:0003677|GO:0016829|GO:0016799|GO:0006974|GO:0032074|GO:0003684|GO:0019104|GO:0005737|GO:0006281|GO:0016787|GO:0016798|GO:0006284|GO:0008152|GO:0008270|GO:0006289|GO:0006979	NM_028347
A_51_P109766	14.830505	P	14.54557	P	1.21835536996527	   269523	Vcp	Mus musculus valosin containing protein (Vcp)	 mRNA [NM_009503]	valosin containing protein	Mm.245976	 42993071	chr4	 42993012	-	mm|4qA5	NM_009503	chr4:42993071-42993012	GO:0005515|GO:0006511|GO:0045732|GO:0006200|GO:0005783|GO:0032436|GO:0005634|GO:0032403|GO:0042802|GO:0006302|GO:0005829|GO:0008289|GO:0005737|GO:0000166|GO:0006810|GO:0051260|GO:0016887|GO:0005792|GO:0000502|GO:0017111|GO:0006919|GO:0019903|GO:0030970|GO:0019904|GO:0005102|GO:0005524|GO:0006974|GO:0006888|GO:0043234|GO:0016787|GO:0005488|GO:0070842|GO:0031593	NM_009503
A_51_P109798	4.1278043	P	1.8912295	A	4.71276845029467	NA		Mus musculus 16 days neonate cerebellum cDNA	 RIKEN full-length enriched library	 clone:9630031E18 product:unclassifiable	 full insert sequence. [AK036057]			 95345581	chr15	 95345522	-	mm|15qF1	AK036057	chr15:95345581-95345522
A_51_P109828	14.625371	P	14.586015	P	1.02765499264745	    22273	Uqcrc1	Mus musculus ubiquinol-cytochrome c reductase core protein 1 (Uqcrc1)	 mRNA [NM_025407]	ubiquinol-cytochrome c reductase core protein 1	Mm.335460	108851683	chr9	108851624	+	mm|9qF2	NM_025407	chr9:108851624-108851683	GO:0070469|GO:0005743|GO:0005750|GO:0003824|GO:0032403|GO:0046872|GO:0005739|GO:0016020|GO:0006122|GO:0006508|GO:0006810|GO:0008270|GO:0004222|GO:0022900	NM_025407
A_51_P109835	12.740967	P	12.911943	P	0.88824157209089	    22273	Uqcrc1	Mus musculus ubiquinol-cytochrome c reductase core protein 1 (Uqcrc1)	 mRNA [NM_025407]	ubiquinol-cytochrome c reductase core protein 1	Mm.335460	108851487	chr9	108851008	+	mm|9qF2	NM_025407	chr9:108851008-108851487	GO:0070469|GO:0005743|GO:0005750|GO:0003824|GO:0032403|GO:0046872|GO:0005739|GO:0016020|GO:0006122|GO:0006508|GO:0006810|GO:0008270|GO:0004222|GO:0022900	NM_025407
A_51_P109840	5.3752174	P	6.222561	P	0.555807188968349	    22370	Vtn	Mus musculus vitronectin (Vtn)	 mRNA [NM_011707]	vitronectin	Mm.3667	 78315665	chr11	 78315393	+	mm|11qB5	NM_011707	chr11:78315393-78315665	GO:0033627|GO:0010811|GO:0050840|GO:0005578|GO:0050731|GO:0005576|GO:0005615|GO:0032092|GO:0014911|GO:0031012|GO:0010951|GO:0061302|GO:0006955|GO:0005178|GO:0007160|GO:0030198|GO:0048260|GO:0030247|GO:0007155|GO:0008201|GO:0005044	NM_011707
A_51_P109864	2.0076082	A	2.0149028	A	0.994956529797835	NA		Mus musculus 2 days pregnant adult female oviduct cDNA	 RIKEN full-length enriched library	 clone:E230017A05 product:unclassifiable	 full insert sequence. [AK054082]			 11177663	chr15	 11177604	+	mm|15qA1	AK054082	chr15:11177604-11177663
A_51_P109881	7.7596884	P	7.565488	P	1.14408988391121	NA		Mus musculus adult male testis cDNA	 RIKEN full-length enriched library	 clone:4930506F14 product:hypothetical protein	 full insert sequence. [AK015717]			107775528	chr9	107775469	+	mm|9qF1	AK015717	chr9:107775469-107775528
A_51_P109888	10.389508	P	10.644735	P	0.837855292449257	    23789	Coro1b	Mus musculus coronin	 actin binding protein 1B (Coro1b)	 mRNA [NM_011778]	coronin	 actin binding protein 1B	Mm.276859	  4153347	chr19	  4153288	+	mm|19qA	NM_011778	chr19:4153288-4153347	GO:0005515|GO:0005737|GO:0051015|GO:0030036|GO:0003779|GO:0015629|GO:0005856	NM_011778
A_51_P109923	9.539035	P	9.476292	P	1.04444968925042	    56715	Rabgef1	Mus musculus RAB guanine nucleotide exchange factor (GEF) 1 (Rabgef1)	 transcript variant 1	 mRNA [NM_019983]	RAB guanine nucleotide exchange factor (GEF) 1	Mm.288639	130689799	chr5	130689740	+	mm|5qG1.3	NM_019983	chr5:130689740-130689799	GO:0005515|GO:0008150|GO:0005737|GO:0006810|GO:0008270|GO:0005575|GO:0015031|GO:0003677|GO:0046872|GO:0006897|GO:0005768	NM_019983
A_51_P109933	10.633135	P	11.072107	P	0.737660044997942	    24084	Tekt2	Mus musculus tektin 2 (Tekt2)	 mRNA [NM_011902]	tektin 2	Mm.23895	125999489	chr4	125999430	-	mm|4qD2.2	NM_011902	chr4:125999489-125999430	GO:0001539|GO:0005886|GO:0005874|GO:0005730|GO:0000226|GO:0005634|GO:0042995|GO:0030317|GO:0015629|GO:0005929|GO:0005737|GO:0030030|GO:0005856|GO:0005925	NM_011902
A_51_P109939	14.185137	P	14.195295	P	0.992983740628815	   246703	Apoa1bp	Mus musculus apolipoprotein A-I binding protein (Apoa1bp)	 mRNA [NM_144897]	apolipoprotein A-I binding protein	Mm.205996	 87860629	chr3	 87860570	-	mm|3qF1	NM_144897	chr3:87860629-87860570	GO:0005739|GO:0008150|GO:0005576	NM_144897
A_51_P109976	13.378933	P	13.562185	P	0.880715523389137	    75434	1700001C02Rik	Mus musculus RIKEN cDNA 1700001C02 gene (1700001C02Rik)	 mRNA [NM_029285]	RIKEN cDNA 1700001C02 gene	Mm.332291	 30786327	chr5	 30786268	+	mm|5qB1	NM_029285	chr5:30786268-30786327	GO:0008150|GO:0003674|GO:0005575	NM_029285
A_51_P110035	11.231007	P	11.010048	P	1.16550807504982	    75669	Pik3r4	Mus musculus phosphatidylinositol 3 kinase	 regulatory subunit	 polypeptide 4	 p150 (Pik3r4)	 mRNA [NM_001081309]	phosphatidylinositol 3 kinase	 regulatory subunit	 polypeptide 4	 p150	Mm.274830	105589655	chr9	105589596	+	mm|9qF1	NM_001081309	chr9:105589596-105589655	GO:0005524|GO:0005829|GO:0003674|GO:0008150|GO:0016310|GO:0004672|GO:0000166|GO:0004674|GO:0005488|GO:0016301|GO:0006468|GO:0016740|GO:0016772	NM_001081309
A_51_P110068	11.68554	P	11.505452	P	1.13295298986721	    64383	Sirt2	Mus musculus sirtuin 2 (silent mating type information regulation 2	 homolog) 2 (S. cerevisiae) (Sirt2)	 transcript variant 1	 mRNA [NM_022432]	sirtuin 2 (silent mating type information regulation 2	 homolog) 2 (S. cerevisiae)	Mm.272443	 29573472	chr7	 29573412	+	mm|7qA3	NM_022432	chr7:29573412-29573472	GO:0035035|GO:0043130|GO:0006342|GO:0006355|GO:0017136|GO:0042826|GO:0016811|GO:0005874|GO:0070403|GO:0046872|GO:0033558|GO:0045843|GO:0005737|GO:0007049|GO:0007067|GO:0051287|GO:0016787|GO:0042903|GO:0008270|GO:0005856|GO:0045892|GO:0006476|GO:0051301|GO:0008134	NM_022432
A_51_P110081	11.340799	P	11.570022	P	0.853094223592437	   242620	Dmrta2	Mus musculus doublesex and mab-3 related transcription factor like family A2 (Dmrta2)	 mRNA [NM_172296]	doublesex and mab-3 related transcription factor like family A2	Mm.32825	109656087	chr4	109656028	+	mm|4qC7	NM_172296	chr4:109656028-109656087	GO:0008150|GO:0003674|GO:0006355|GO:0003700|GO:0007548|GO:0005634|GO:0005575|GO:0003677|GO:0046872	NM_172296
A_51_P110088	6.7574716	P	6.4117565	P	1.27078071375964	   236727	Slc9a7	Mus musculus solute carrier family 9 (sodium/hydrogen exchanger)	 member 7 (Slc9a7)	 mRNA [NM_177353]	solute carrier family 9 (sodium/hydrogen exchanger)	 member 7	Mm.132983	 19682941	chrX	 19682882	-	mm|XqA1.3	NM_177353	chrX:19682941-19682882	GO:0005802|GO:0015386|GO:0005794|GO:0015385|GO:0055085|GO:0006885|GO:0071436|GO:0015297|GO:0016020|GO:0015299|GO:0006810|GO:0016021|GO:0006814|GO:0055038|GO:0006813|GO:0006812|GO:0005768|GO:0006811	NM_177353
A_51_P110108	5.456211	P	5.5979156	P	0.90644751954293	   113865	Vmn1r25	Mus musculus vomeronasal 1 receptor 25 (Vmn1r25)	 mRNA [NM_053238]	vomeronasal 1 receptor 25	Mm.431972	 57929178	chr6	 57929119	-	mm|6qB3	NM_053238	chr6:57929178-57929119	GO:0007165|GO:0007606|GO:0004872|GO:0005575	NM_053238
A_51_P110147	10.581503	P	10.740707	P	0.89551903293315	    66229	Rpl7l1	Mus musculus ribosomal protein L7-like 1 (Rpl7l1)	 mRNA [NM_025433]	ribosomal protein L7-like 1	Mm.218533	 46911737	chr17	 46911678	-	mm|17qC	NM_025433	chr17:46911737-46911678	GO:0005622|GO:0008150|GO:0003674|GO:0003735|GO:0030529|GO:0015934|GO:0005840|GO:0005575|GO:0006412	NM_025433
A_51_P110165	4.827211	P	4.960758	P	0.911587470224667	100049163	Gm9777	Mus musculus adult male testis cDNA	 RIKEN full-length enriched library	 clone:4930423F13 product:hypothetical protein	 full insert sequence. [AK019581]	predicted gene 9777	Mm.486065	120198161	chr13	120198102	+	mm|13qD2.3	AK019581	chr13:120198102-120198161	GO:0008150|GO:0003674|GO:0005575
A_51_P110168	7.1131725	P	6.8379955	P	1.21014254893263	    66262	Ing5	Mus musculus inhibitor of growth family	 member 5 (Ing5)	 mRNA [NM_025454]	inhibitor of growth family	 member 5	Mm.64065	 95714920	chr1	 95714861	+	mm|1qD	NM_025454	chr1:95714861-95714920	GO:0070776|GO:0006355|GO:0008285|GO:0005634|GO:0006351|GO:0046872|GO:0006260|GO:0003674|GO:0043966|GO:0008270|GO:0045893|GO:0006473|GO:0045926|GO:0016568	NM_025454
A_51_P110173	6.913388	P	7.1081176	P	0.873736642406558	    66262	Ing5	Mus musculus inhibitor of growth family	 member 5 (Ing5)	 mRNA [NM_025454]	inhibitor of growth family	 member 5	Mm.64065	 95714954	chr1	 95714895	+	mm|1qD	NM_025454	chr1:95714895-95714954	GO:0070776|GO:0006355|GO:0008285|GO:0005634|GO:0006351|GO:0046872|GO:0006260|GO:0003674|GO:0043966|GO:0008270|GO:0045893|GO:0006473|GO:0045926|GO:0016568	NM_025454
A_51_P110189	4.5244193	P	5.2058372	P	0.62355213781198	   117160	Ttyh2	Mus musculus tweety homolog 2 (Drosophila) (Ttyh2)	 mRNA [NM_053273]	tweety homolog 2 (Drosophila)	Mm.271934	114573135	chr11	114573076	+	mm|11qE2	NM_053273	chr11:114573076-114573135	GO:0008150|GO:0006821|GO:0003674|GO:0016020|GO:0005886|GO:0034707|GO:0006810|GO:0016021|GO:0005254|GO:0005216|GO:0006811	NM_053273
A_51_P110220	2.136166	A	2.118714	A	1.01217026685653	   381695	N4bp2l2	Mus musculus NEDD4 binding protein 2-like 2 (N4bp2l2)	 mRNA [NM_201369]	NEDD4 binding protein 2-like 2	Mm.246934	151444093	chr5	151444034	-	mm|5qG3	NM_201369	chr5:151444093-151444034	GO:0005515|GO:0001906|GO:0001824|GO:0005634|GO:0005524|GO:0001701	NM_201369
A_51_P110283	2.092741	A	2.0868506	A	1.00409126060177	NA		Mus musculus 13 days embryo lung cDNA	 RIKEN full-length enriched library	 clone:D430013O20 product:hypothetical protein	 full insert sequence. [AK084929]			 27959524	chr19	 27959465	-	mm|19qC1	AK084929	chr19:27959524-27959465
A_51_P110289	12.569969	P	5.380602	P	145.953702617573	   242384	Lingo2	Mus musculus leucine rich repeat and Ig domain containing 2 (Lingo2)	 transcript variant 3	 mRNA [NM_175516]	leucine rich repeat and Ig domain containing 2	Mm.132507	 35655175	chr4	 35655116	-	mm|4qA5	NM_175516	chr4:35655175-35655116	GO:0016020|GO:0016021	NM_175516
A_51_P110301	17.077627	P	16.94317	P	1.09767959256954	    12266	C3	Mus musculus complement component 3 (C3)	 mRNA [NM_009778]	complement component 3	Mm.19131	 57343475	chr17	 57343416	-	mm|17qD	NM_009778	chr17:57343475-57343416	GO:0005515|GO:0048037|GO:0005576|GO:0005615|GO:0010575|GO:0008289|GO:0006957|GO:0006956|GO:0050766|GO:0007596|GO:0048639|GO:0001798|GO:0070374	NM_009778
A_51_P110317	3.160386	A	3.1565385	A	1.00267044307512	    68529	1110019B22Rik	Mus musculus 18-day embryo whole body cDNA	 RIKEN full-length enriched library	 clone:1110019B22 product:unclassifiable	 full insert sequence. [AK003805]	RIKEN cDNA 1110019B22 gene		 95181513	chr10	 95181454	-	mm|10qC2	AK003805	chr10:95181513-95181454	GO:0008150|GO:0003674|GO:0005575
A_51_P110323	11.889752	P	12.163072	P	0.82741326958701	    14675	Gna14	Mus musculus guanine nucleotide binding protein	 alpha 14 (Gna14)	 mRNA [NM_008137]	guanine nucleotide binding protein	 alpha 14	Mm.313181	 16684032	chr19	 16683973	+	mm|19qB	NM_008137	chr19:16683973-16684032	GO:0001664|GO:0005886|GO:0005834|GO:0003924|GO:0005525|GO:0031683|GO:0031234|GO:0006184|GO:0000166|GO:0007186|GO:0060158|GO:0007188|GO:0004871	NM_008137
A_51_P110329	4.0435643	P	3.8334143	P	1.15680845343053	    78789	Vsig1	Mus musculus V-set and immunoglobulin domain containing 1 (Vsig1)	 transcript variant 1	 mRNA [NM_030181]	V-set and immunoglobulin domain containing 1	Mm.244932	137472642	chrX	137472583	+	mm|XqF1	NM_030181	chrX:137472583-137472642	GO:0008150|GO:0003674|GO:0016020|GO:0016021|GO:0005575	NM_030181
A_51_P110341	17.605938	P	15.421515	P	4.54544959532325	    68662	Scgb3a1	Mus musculus secretoglobin	 family 3A	 member 1 (Scgb3a1)	 transcript variant B	 mRNA [NM_170727]	secretoglobin	 family 3A	 member 1	Mm.22802	 49478548	chr11	 49478489	+	mm|11qB1.2	NM_170727	chr11:49478489-49478548	GO:0008150|GO:0003674|GO:0005576|GO:0005575|GO:0005615|GO:0005125	NM_170727
A_51_P110371	7.702258	P	7.7218204	P	0.986531895160035	    80707	Wwox	Mus musculus WW domain-containing oxidoreductase (Wwox)	 mRNA [NM_019573]	WW domain-containing oxidoreductase	Mm.440420	117876412	chr8	117876353	+	mm|8qE1	NM_019573	chr8:117876353-117876412	GO:0005515|GO:0005794|GO:0030178|GO:0048705|GO:0006915|GO:0005634|GO:0006917|GO:0001649|GO:0005739|GO:0005737|GO:0005488|GO:0008152|GO:0016491|GO:0016055|GO:0055114	NM_019573
A_51_P110381	2.6356761	A	4.4353075	P	0.287247969521988	   246278	Cd207	Mus musculus CD207 antigen (Cd207)	 mRNA [NM_144943]	CD207 antigen	Mm.136079	 83621501	chr6	 83621442	-	mm|6qC3	NM_144943	chr6:83621501-83621442	GO:0051607|GO:0016020|GO:0005887|GO:0005488|GO:0005529|GO:0016021	NM_144943
A_51_P110395	12.527861	P	12.507611	P	1.01413520080331	   235626	Setd2	Mus musculus SET domain containing 2 (Setd2)	 mRNA [NM_001081340]	SET domain containing 2	Mm.288949	110520983	chr9	110520924	+	mm|9qF2	NM_001081340	chr9:110520924-110520983	GO:0010468|GO:0008168|GO:0010452|GO:0001843|GO:0005634|GO:0001525|GO:0048864|GO:0060039|GO:0048701|GO:0032259|GO:0018023|GO:0060977|GO:0060669|GO:0003674|GO:0051789|GO:0048568|GO:0035441|GO:0048332|GO:0030900|GO:0001570|GO:0016740|GO:0001763	NM_001081340
A_51_P110421	4.390353	P	3.999984	P	1.31072860776134	NA		Mus musculus adult male thymus cDNA	 RIKEN full-length enriched library	 clone:5830410E11 product:cyclin-dependent kinase 6	 full insert sequence. [AK017915]			  3473275	chr5	  3473216	-	mm|5qA1	AK017915	chr5:3473275-3473216
A_51_P110455	13.7555685	P	14.079013	P	0.799159568220177	    15505	Hsph1	Mus musculus heat shock 105kDa/110kDa protein 1 (Hsph1)	 mRNA [NM_013559]	heat shock 105kDa/110kDa protein 1	Mm.270681	150419485	chr5	150419426	-	mm|5qG3	NM_013559	chr5:150419485-150419426	GO:0005515|GO:0006986|GO:0043014|GO:0005874|GO:0006950|GO:0005576|GO:0005634|GO:0005524|GO:0070507|GO:0005737|GO:0043524|GO:0000166|GO:0045345|GO:0051135|GO:0051085	NM_013559
A_51_P110471	5.7232065	P	6.921235	P	0.435870509194667	    69219	Ddah1	Mus musculus dimethylarginine dimethylaminohydrolase 1 (Ddah1)	 mRNA [NM_026993]	dimethylarginine dimethylaminohydrolase 1	Mm.234247	145516211	chr3	145516152	+	mm|3qH2	NM_026993	chr3:145516152-145516211	GO:0016813|GO:0046872|GO:0045766|GO:0006809|GO:0045429|GO:0005739|GO:0005737|GO:0016787|GO:0006525|GO:0000052|GO:0008270|GO:0017014|GO:0016597|GO:0016403	NM_026993
A_51_P110529	9.40852	P	9.627418	P	0.859221500629753	    18845	Plxna2	Mus musculus plexin A2 (Plxna2)	 mRNA [NM_008882]	plexin A2	Mm.2251	196638439	chr1	196638380	+	mm|1qH6	NM_008882	chr1:196638380-196638439	GO:0005622|GO:0021935|GO:0007165|GO:0051642|GO:0017154|GO:0016020|GO:0005886|GO:0007275|GO:0004872|GO:0016021|GO:0007166	NM_008882
A_51_P110547	3.6860213	A	4.105329	P	0.747783373896542	NA		Mus musculus adult male liver tumor cDNA	 RIKEN full-length enriched library	 clone:C730047G17 product:unclassifiable	 full insert sequence. [AK050424]			161264131	chr1	161264072	+	mm|1qH1	AK050424	chr1:161264072-161264131
A_51_P110576	13.974767	P	13.708722	P	1.20250675645077	    19141	Lgmn	Mus musculus legumain (Lgmn)	 mRNA [NM_011175]	legumain	Mm.17185	103632634	chr12	103632575	-	mm|12qE	NM_011175	chr12:103632634-103632575	GO:0005770|GO:0042359|GO:0045177|GO:0005764|GO:0004197|GO:0043524|GO:0016787|GO:0040015|GO:0006508|GO:0001101|GO:0008233|GO:0008234|GO:0008202	NM_011175
A_51_P110618	2.3694115	A	2.7236319	A	0.7822922621011	   116972	Fam57a	family with sequence similarity 57	 member A [Source:MGI Symbol;Acc:MGI:2151840] [ENSMUST00000127340]	family with sequence similarity 57	 member A	Mm.188413	 76027495	chr11	 76027436	+	mm|11qB5	AK158967	chr11:76027436-76027495	GO:0008150|GO:0003674|GO:0016020|GO:0005886|GO:0016021|GO:0005575
A_51_P110640	5.321836	P	5.7877407	P	0.724016910941916	    16613	Klk1b11	Mus musculus kallikrein 1-related peptidase b11 (Klk1b11)	 mRNA [NM_010640]	kallikrein 1-related peptidase b11	Mm.443378	 51255178	chr7	 51255119	+	mm|7qB4	NM_010640	chr7:51255119-51255178	GO:0008150|GO:0003674|GO:0016787|GO:0004252|GO:0006508|GO:0008236|GO:0008233|GO:0005575|GO:0003824	NM_010640
A_51_P110651	8.810162	P	8.713169	P	1.06954189842299	    22654	Zfp13	Mus musculus zinc finger protein 13 (Zfp13)	 mRNA [NM_011747]	zinc finger protein 13	Mm.40326	 23712941	chr17	 23712882	-	mm|17qA3.3	NM_011747	chr17:23712941-23712882	GO:0005622|GO:0006355|GO:0008270|GO:0005634|GO:0003676|GO:0003677|GO:0046872	NM_011747
A_51_P110672	10.519184	P	11.055811	P	0.689380788645532	    19882	Mst1r	Mus musculus macrophage stimulating 1 receptor (c-met-related tyrosine kinase) (Mst1r)	 mRNA [NM_009074]	macrophage stimulating 1 receptor (c-met-related tyrosine kinase)	Mm.3901	107822625	chr9	107822566	+	mm|9qF1	NM_009074	chr9:107822566-107822625	GO:0001725|GO:0005886|GO:0009615|GO:0005524|GO:0007165|GO:0016310|GO:0000166|GO:0016020|GO:0016301|GO:0004872|GO:0006468|GO:0004713|GO:0016021|GO:0016740	NM_009074
A_51_P110689	9.620499	P	9.201658	P	1.33685315216298	    20135	Rrm2	Mus musculus 2 days neonate thymus thymic cells cDNA	 RIKEN full-length enriched library	 clone:E430030O12 product:ribonucleotide reductase M2	 full insert sequence. [AK088907]	ribonucleotide reductase M2	Mm.99	 25398674	chr12	 25398619	+	mm|12qA1.3	AK088907	chr12:25398619-25398674	GO:0005515|GO:0008284|GO:0009186|GO:0046914|GO:0051290|GO:0005625|GO:0005635|GO:0051259|GO:0046872|GO:0006260|GO:0005737|GO:0009263|GO:0009262|GO:0016491|GO:0004748|GO:0055114
A_51_P110699	6.220471	P	6.6091895	P	0.763807769324689	   263876	Spata2	Mus musculus spermatogenesis associated 2 (Spata2)	 mRNA [NM_170756]	spermatogenesis associated 2	Mm.34342	167308185	chr2	167308126	-	mm|2qH3	NM_170756	chr2:167308185-167308126	GO:0008150|GO:0003674|GO:0005737	NM_170756
A_51_P110725	5.2085595	P	5.2674494	P	0.960002521320237	    72033	Tsc22d2	Mus musculus TSC22 domain family	 member 2 (Tsc22d2)	 mRNA [NM_001081229]	TSC22 domain family	 member 2	Mm.218409	 58264896	chr3	 58264837	+	mm|3qD	NM_001081229	chr3:58264837-58264896	GO:0003674|GO:0006970|GO:0005575	NM_001081229
A_51_P110759	11.102917	P	11.061138	P	1.02938238487272	    20510	Slc1a1	Mus musculus solute carrier family 1 (neuronal/epithelial high affinity glutamate transporter	 system Xag)	 member 1 (Slc1a1)	 mRNA [NM_009199]	solute carrier family 1 (neuronal/epithelial high affinity glutamate transporter	 system Xag)	 member 1	Mm.246670	 28988391	chr19	 28988332	+	mm|19qC1	NM_009199	chr19:28988332-28988391	GO:0015501|GO:0051938|GO:0070779|GO:0005313|GO:0003333|GO:0071436|GO:0015813|GO:0016020|GO:0006810|GO:0006835|GO:0051260|GO:0016021|GO:0016595|GO:0017153|GO:0015807|GO:0015293	NM_009199
A_51_P110791	3.6209893	A	4.2309127	P	0.65523149057012	    20589	Ighmbp2	Mus musculus immunoglobulin mu binding protein 2 (Ighmbp2)	 mRNA [NM_009212]	immunoglobulin mu binding protein 2	Mm.3179	  3259930	chr19	  3259871	-	mm|19qA	NM_009212	chr19:3259930-3259871	GO:0043141|GO:0000049|GO:0021522|GO:0003723|GO:0032575|GO:0005634|GO:0000122|GO:0003677|GO:0005524|GO:0008186|GO:0001078|GO:0005737|GO:0000166|GO:0043025|GO:0043022|GO:0051260|GO:0008094|GO:0008134	NM_009212
A_51_P110814	14.226877	P	14.051259	P	1.12944811719083	    74167	Nudt9	Mus musculus nudix (nucleoside diphosphate linked moiety X)-type motif 9 (Nudt9)	 mRNA [NM_028794]	nudix (nucleoside diphosphate linked moiety X)-type motif 9	Mm.241484	104494294	chr5	104494235	+	mm|5qE5	NM_028794	chr5:104494235-104494294	GO:0005739|GO:0047631|GO:0016787|GO:0046032|GO:0043262|GO:0046709	NM_028794
A_51_P110830	5.9003806	P	7.5728908	P	0.313707037686778	    30806	Adamts8	Mus musculus a disintegrin-like and metallopeptidase (reprolysin type) with thrombospondin type 1 motif	 8 (Adamts8)	 mRNA [NM_013906]	a disintegrin-like and metallopeptidase (reprolysin type) with thrombospondin type 1 motif	 8	Mm.100582	 30770279	chr9	 30770220	+	mm|9qA4	NM_013906	chr9:30770220-30770279	GO:0031012|GO:0016787|GO:0006508|GO:0005578|GO:0008270|GO:0008233|GO:0005576|GO:0004222|GO:0008201|GO:0046872|GO:0008237	NM_013906
A_51_P110841	10.73109	P	11.074516	P	0.788167409069051	   232536	Mrps35	Mus musculus mitochondrial ribosomal protein S35 (Mrps35)	 nuclear gene encoding mitochondrial protein	 mRNA [NM_145573]	mitochondrial ribosomal protein S35	Mm.46656	147019119	chr6	147009999	+	mm|6qG3	NM_145573	chr6:147009999-147019119	GO:0005739|GO:0008150|GO:0003674|GO:0030529|GO:0005840	NM_145573
A_51_P110863	2.982489	A	2.3090327	A	1.59488930978598	   258811	Olfr926	Mus musculus olfactory receptor 926 (Olfr926)	 mRNA [NM_146815]	olfactory receptor 926	Mm.377701	 38685569	chr9	 38685510	+	mm|9qA5.1	NM_146815	chr9:38685510-38685569	GO:0007608|GO:0007165|GO:0004984|GO:0007186|GO:0004930|GO:0004872|GO:0016021|GO:0004871	NM_146815
A_51_P110873	3.572477	A	3.4473474	A	1.09060569941935	   258881	Olfr1404	Mus musculus olfactory receptor 1404 (Olfr1404)	 mRNA [NM_146881]	olfactory receptor 1404	Mm.377733	175146094	chr1	175146035	+	mm|1qH3	NM_146881	chr1:175146035-175146094	GO:0007608|GO:0004984|GO:0007186|GO:0004872|GO:0016021	NM_146881
A_51_P110914	3.1770198	A	3.800248	A	0.649216602636425	    76386	1700010D01Rik	Mus musculus RIKEN cDNA 1700010D01 gene (1700010D01Rik)	 mRNA [NM_029590]	RIKEN cDNA 1700010D01 gene	Mm.443249	 92928367	chrX	 92928135	-	mm|XqC3	NM_029590	chrX:92928367-92928135	GO:0008150|GO:0003674|GO:0005575	NM_029590
A_51_P110931	11.362179	P	11.1388035	P	1.16746192549238	    76416	Znrd1as	Mus musculus ZNRD1 antisense RNA (Znrd1as)	 mRNA [NM_029602]	ZNRD1 antisense RNA	Mm.26684	 37102362	chr17	 37102303	+	mm|17qB1	NM_029602	chr17:37102303-37102362	GO:0008150|GO:0003674|GO:0005575	NM_029602
A_51_P110938	5.767997	P	6.7023625	P	0.523272555553362	   238130	Dock4	Mus musculus dedicator of cytokinesis 4 (Dock4)	 mRNA [NM_172803]	dedicator of cytokinesis 4	Mm.341423	 41472338	chr12	 41472279	+	mm|12qB1	NM_172803	chr12:41472279-41472338	GO:0030971|GO:0017124|GO:0032420|GO:0032421|GO:0005525|GO:0030165|GO:0032855|GO:0005829|GO:0005085|GO:0048365|GO:0005737|GO:0051020|GO:0016020|GO:0060326|GO:0030675	NM_172803
A_51_P111003	8.271298	P	8.196056	P	1.05353774325919	    66714	4921524J17Rik	Mus musculus RIKEN cDNA 4921524J17 gene (4921524J17Rik)	 transcript variant 1	 mRNA [NM_025722]	RIKEN cDNA 4921524J17 gene	Mm.272748	 87933274	chr8	 87933215	-	mm|8qC3	NM_025722	chr8:87933274-87933215	GO:0008150|GO:0003674|GO:0005575	NM_025722
A_51_P111018	7.823114	P	7.6875334	P	1.09853482056989	   320473	Heatr5b	Mus musculus HEAT repeat containing 5B (Heatr5b)	 mRNA [NM_001081179]	HEAT repeat containing 5B	Mm.210489	 79194653	chr17	 79194594	-	mm|17qE3	NM_001081179	chr17:79194653-79194594	GO:0008150|GO:0003674|GO:0005488|GO:0005575	NM_001081179
A_51_P111068	2.8217115	A	2.2140474	A	1.52379000784489	   258729	Olfr478	Mus musculus olfactory receptor 478 (Olfr478)	 mRNA [NM_146734]	olfactory receptor 478	Mm.223162	115175566	chr7	115175507	-	mm|7qE3	NM_146734	chr7:115175566-115175507	GO:0007608|GO:0007165|GO:0004984|GO:0016020|GO:0007186|GO:0005886|GO:0004930|GO:0004872|GO:0016021|GO:0004871|GO:0050896	NM_146734
A_51_P111094	2.0571465	A	2.0407748	A	1.01141263047466	   329919	Skint2	Mus musculus selection and upkeep of intraepithelial T cells 2 (Skint2)	 mRNA [NM_177865]	selection and upkeep of intraepithelial T cells 2	Mm.259806	112318084	chr4	112318025	+	mm|4qD1	NM_177865	chr4:112318025-112318084	GO:0016020|GO:0016021	NM_177865
A_51_P111143	14.604128	P	14.297983	P	1.23639952066846	    93684	15-Sep	Mus musculus selenoprotein (Sep15)	 mRNA [NM_053102]	selenoprotein	Mm.29812	144260459	chr3	144260400	+	mm|3qH2	NM_053102	chr3:144260400-144260459	GO:0005515|GO:0008430|GO:0005783|GO:0051084|GO:0005788|GO:0008379|GO:0035092|GO:0055114	NM_053102
A_51_P111164	10.770775	P	12.209142	P	0.368984725295898	   223881	Rnd1	Mus musculus Rho family GTPase 1 (Rnd1)	 mRNA [NM_172612]	Rho family GTPase 1	Mm.274010	 98500378	chr15	 98500319	-	mm|15qF1	NM_172612	chr15:98500378-98500319	GO:0005886|GO:0007264|GO:0005102|GO:0005525|GO:0005829|GO:0016322|GO:0005622|GO:0005737|GO:0007162|GO:0000166|GO:0005912|GO:0016020|GO:0007015|GO:0005856	NM_172612
A_51_P111192	4.9658585	P	5.817253	P	0.554248743664366	    13101	Cyp2d10	Mus musculus cytochrome P450	 family 2	 subfamily d	 polypeptide 10 (Cyp2d10)	 mRNA [NM_010005]	cytochrome P450	 family 2	 subfamily d	 polypeptide 10	Mm.174372	 82233447	chr15	 82233388	-	mm|15qE1	NM_010005	chr15:82233447-82233388	GO:0005792|GO:0005506|GO:0070330|GO:0005783|GO:0009055|GO:0046872|GO:0004497|GO:0016020|GO:0016491|GO:0016712|GO:0016705|GO:0020037|GO:0055114	NM_010005
A_51_P111210	10.824474	P	10.976816	P	0.89978860391999	    70099	Smc4	Mus musculus structural maintenance of chromosomes 4 (Smc4)	 mRNA [NM_133786]	structural maintenance of chromosomes 4	Mm.206841	 68838512	chr3	 68838453	+	mm|3qE1	NM_133786	chr3:68838453-68838512	GO:0000796|GO:0007076|GO:0051276|GO:0046982|GO:0005694|GO:0030261|GO:0005634|GO:0005524|GO:0005737|GO:0007049|GO:0007067|GO:0000166|GO:0051301	NM_133786
A_51_P111212	12.294076	P	12.108845	P	1.13699901153117	    67604	Get4	Mus musculus golgi to ER traffic protein 4 homolog (S. cerevisiae) (Get4)	 transcript variant 1	 mRNA [NM_026269]	golgi to ER traffic protein 4 homolog (S. cerevisiae)	Mm.270137	139745938	chr5	139745879	+	mm|5qG2	NM_026269	chr5:139745879-139745938	GO:0003674|GO:0005737|GO:0006810|GO:0071816|GO:0071818|GO:0005829	NM_026269
A_51_P111223	4.0348935	A	3.6917548	A	1.26851334772042	   259098	Olfr606	Mus musculus olfactory receptor 606 (Olfr606)	 mRNA [NM_147094]	olfactory receptor 606	Mm.377840	110600808	chr7	110600749	+	mm|7qE3	NM_147094	chr7:110600749-110600808	GO:0007608|GO:0007165|GO:0004984|GO:0007186|GO:0004930|GO:0004872|GO:0016021|GO:0004871	NM_147094
A_51_P111233	9.9070215	P	3.651108	A	76.4218617921777	    13489	Drd2	dopamine receptor D2 [Source:MGI Symbol;Acc:MGI:94924] [ENSMUST00000075764]	dopamine receptor D2	Mm.41970	 49215820	chr9	 49215761	+	mm|9qA5.3	X55674	chr9:49215761-49215820	GO:0007608|GO:0001659|GO:0007409|GO:0042220|GO:0031223|GO:0007243|GO:0019861|GO:0030672|GO:0030534|GO:0009416|GO:0016055|GO:0008306|GO:0030336|GO:0007616|GO:0004930|GO:0035240|GO:0014069|GO:0007212|GO:0030432|GO:0032922|GO:0002031|GO:0007270|GO:0007186|GO:0002027|GO:0005887|GO:0032228|GO:0008542|GO:0035815|GO:0002028|GO:0001591|GO:0007188|GO:0035810|GO:0034776|GO:0021984|GO:0030424|GO:0007631|GO:0008285|GO:0005886|GO:0030139|GO:0007195|GO:0007194|GO:0030425|GO:0014059|GO:0032147|GO:0001964|GO:0042417|GO:0008104|GO:0043197|GO:0008144|GO:0001963|GO:0007628|GO:0004872|GO:0007626|GO:0040018|GO:0030814|GO:0004871|GO:0007625|GO:0001666|GO:0001669|GO:0042493|GO:0005102|GO:0004952|GO:0002052|GO:0005625|GO:0031410|GO:0016328|GO:0021853|GO:0007165|GO:0001975|GO:0001976|GO:0035255|GO:0016020|GO:0042321|GO:0030900|GO:0016021|GO:0002092|GO:0001670
A_51_P111245	9.748871	P	10.412264	P	0.631391612099318	   218214	Kdm1b	Mus musculus lysine (K)-specific demethylase 1B (Kdm1b)	 mRNA [NM_172262]	lysine (K)-specific demethylase 1B	Mm.31259	 47179861	chr13	 47179802	+	mm|13qA5	NM_172262	chr13:47179802-47179861	GO:0006355|GO:0050660|GO:0005634|GO:0007275|GO:0046872|GO:0006351|GO:0034720|GO:0034648|GO:0044030|GO:0034647|GO:0006349|GO:0016491|GO:0034649|GO:0008270|GO:0055114|GO:0016568|GO:0043046	NM_172262
A_51_P111259	12.975599	P	13.2415905	P	0.8316269980997	    52004	Cdk2ap2	Mus musculus CDK2-associated protein 2 (Cdk2ap2)	 mRNA [NM_026373]	CDK2-associated protein 2	Mm.29609	  4099008	chr19	  4098949	+	mm|19qA	NM_026373	chr19:4098949-4099008	GO:0008150|GO:0003674|GO:0005575	NM_026373
A_51_P111285	9.785623	P	9.128901	P	1.57649653597409	    16661	Krt10	Mouse mRNA encoding epidermal keratin subunit. [V00830]	keratin 10	Mm.22662	NA		NA			V00830		GO:0005882|GO:0005515|GO:0005198|GO:0030855|GO:0071277|GO:0045095
A_51_P111293	4.3117237	P	4.817541	P	0.70426129404373	    69677	Il1f8	interleukin 1 family	 member 8 [Source:MGI Symbol;Acc:MGI:1916927] [ENSMUST00000028363]	interleukin 1 family	 member 8	Mm.45901	 24015698	chr2	 24015639	+	mm|2qA3	AK009787	chr2:24015639-24015698	GO:0008150|GO:0003674|GO:0006955|GO:0005149|GO:0006954|GO:0005576|GO:0005575|GO:0005615|GO:0005125
A_51_P111325	4.721851	P	4.349093	P	1.29482578446527	   320771	C030040A22Rik	Mus musculus adult male thymus cDNA	 RIKEN full-length enriched library	 clone:5830426A02 product:unclassifiable	 full insert sequence. [AK030844]	RIKEN cDNA C030040A22 gene	Mm.447543	109129875	chr7	109129816	+	mm|7qE3	AK030844	chr7:109129816-109129875	GO:0008150|GO:0003674|GO:0005575
A_51_P111335	4.400585	P	4.256035	P	1.10538581176574	   432720	Akr1c19	Mus musculus aldo-keto reductase family 1	 member C19 (Akr1c19)	 mRNA [NM_001013785]	aldo-keto reductase family 1	 member C19	Mm.22832	  4247560	chr13	  4247501	+	mm|13qA1	NM_001013785	chr13:4247501-4247560	GO:0008150|GO:0003674|GO:0005575	NM_001013785
A_51_P111380	7.65387	P	7.9884663	P	0.793006007296318	NA		Mus musculus frataxin pseudogene	 complete sequence. [AF223568]		Mm.423573	 38151249	chr17	 38151190	+	mm|17qB1	AF223568	chr17:038151190-038151249
A_51_P111434	3.454239	A	3.7210755	A	0.831140048995832	NA					NA		NA
A_51_P111455	6.6995707	P	6.667019	P	1.02281959155602	    70465	Wdr77	Mus musculus WD repeat domain 77 (Wdr77)	 mRNA [NM_027432]	WD repeat domain 77	Mm.5110	105764596	chr3	105764537	+	mm|3qF2.2	NM_027432	chr3:105764537-105764596	GO:0060770|GO:0008284|GO:0005737|GO:0030374|GO:0008285|GO:0006357|GO:0005634|GO:0000387|GO:0060528	NM_027432
A_51_P111462	10.30862	P	10.705573	P	0.759460586148563	   218639	Arl15	Mus musculus ADP-ribosylation factor-like 15 (Arl15)	 mRNA [NM_172595]	ADP-ribosylation factor-like 15	Mm.79837	114947621	chr13	114947562	+	mm|13qD2.2	NM_172595	chr13:114947562-114947621	GO:0008150|GO:0003674|GO:0000166|GO:0005575|GO:0005525	NM_172595
A_51_P111488	11.263557	P	10.810125	P	1.36929377246461	    70575	Gfod2	Mus musculus glucose-fructose oxidoreductase domain containing 2 (Gfod2)	 mRNA [NM_027469]	glucose-fructose oxidoreductase domain containing 2	Mm.40954	108240340	chr8	108240281	-	mm|8qD3	NM_027469	chr8:108240340-108240281	GO:0031012|GO:0003674|GO:0030198|GO:0005488|GO:0016491|GO:0005578|GO:0005576|GO:0055114	NM_027469
A_51_P111492	11.328676	P	11.516282	P	0.87806156347145	    18030	Nfil3	Mus musculus nuclear factor	 interleukin 3	 regulated (Nfil3)	 mRNA [NM_017373]	nuclear factor	 interleukin 3	 regulated	Mm.136604	 53062928	chr13	 53062869	-	mm|13qB1	NM_017373	chr13:53062928-53062869	GO:0043565|GO:0006355|GO:0003700|GO:0046983|GO:0007623|GO:0005634|GO:0048511|GO:0003677|GO:0006351	NM_017373
A_51_P111513	2.583685	A	2.4889917	A	1.06783837403549	NA					 13586344	chr19	 13586285	+	mm|19qA		chr19:013586285-013586344
A_51_P111532	5.112464	P	5.749473	P	0.643044730181014	   328795	Ubash3a	Mus musculus ubiquitin associated and SH3 domain containing	 A (Ubash3a)	 mRNA [NM_177823]	ubiquitin associated and SH3 domain containing	 A	Mm.387930	 31378435	chr17	 31378376	+	mm|17qA3.3	NM_177823	chr17:31378376-31378435	GO:0001817|GO:0050860|GO:0005829	NM_177823
A_51_P111544	14.536891	P	14.36315	P	1.12797961860232	    20813	Srp14	Mus musculus signal recognition particle 14 (Srp14)	 mRNA [NM_009273]	signal recognition particle 14	Mm.363404	118301702	chr2	118301643	-	mm|2qE5	NM_009273	chr2:118301702-118301643	GO:0005786|GO:0003674|GO:0005737|GO:0042493|GO:0030942|GO:0030529|GO:0006614|GO:0003723|GO:0008312|GO:0048500|GO:0045047|GO:0045900	NM_009273
A_51_P111554	11.241134	P	10.19606	P	2.06347219734355	    20916	Sucla2	Mus musculus succinate-Coenzyme A ligase	 ADP-forming	 beta subunit (Sucla2)	 nuclear gene encoding mitochondrial protein	 mRNA [NM_011506]	succinate-Coenzyme A ligase	 ADP-forming	 beta subunit	Mm.38951	 73995857	chr14	 73995798	+	mm|14qD3	NM_011506	chr14:73995798-73995857	GO:0005739|GO:0006099|GO:0000166|GO:0006105|GO:0016874|GO:0006104|GO:0008152|GO:0004774|GO:0004775|GO:0003824|GO:0005524|GO:0046872	NM_011506
A_51_P111562	8.733842	P	8.631544	P	1.07348199963874	   217835	Rin3	Mus musculus Ras and Rab interactor 3 (Rin3)	 transcript variant 1	 mRNA [NM_177620]	Ras and Rab interactor 3	Mm.24145	103628500	chr12	103628441	+	mm|12qE	NM_177620	chr12:103628441-103628500	GO:0008150|GO:0003674|GO:0005575	NM_177620
A_51_P111583	10.905233	P	11.227858	P	0.79961364707176	    21357	Tarbp2	Mus musculus TAR (HIV) RNA binding protein 2 (Tarbp2)	 mRNA [NM_009319]	TAR (HIV) RNA binding protein 2	Mm.291485	102353886	chr15	102353827	+	mm|15qF3	NM_009319	chr15:102353827-102353886	GO:0030423|GO:0005737|GO:0050689|GO:0030422|GO:0035197|GO:0031054|GO:0035280|GO:0046782|GO:0045070|GO:0042803|GO:0016442	NM_009319
A_51_P111595	9.894564	P	9.578964	P	1.24452913079947	   213452	Dstyk	Mus musculus dual serine/threonine and tyrosine protein kinase (Dstyk)	 mRNA [NM_172516]	dual serine/threonine and tyrosine protein kinase	Mm.257120	134361914	chr1	134361855	+	mm|1qE4	NM_172516	chr1:134361855-134361914	GO:0016310|GO:0005737|GO:0004672|GO:0000166|GO:0016301|GO:0004674|GO:0006468|GO:0004713|GO:0005524|GO:0016740|GO:0016772	NM_172516
A_51_P111612	10.531165	P	11.483218	P	0.516896378656	    66412	Arrdc4	Mus musculus arrestin domain containing 4 (Arrdc4)	 transcript variant 1	 mRNA [NM_001042592]	arrestin domain containing 4	Mm.251199	 75881964	chr7	 75881905	-	mm|7qD1	NM_001042592	chr7:75881964-75881905	GO:0008150|GO:0003674|GO:0005575	NM_001042592
A_51_P111655	5.9890814	P	6.3439646	P	0.781932945537308	   319317	Snhg11	Mus musculus small nucleolar RNA host gene 11 (Snhg11)	 mRNA [NM_175692]	small nucleolar RNA host gene 11	Mm.294494	158210438	chr2	158210379	+	mm|2qH1	NM_175692	chr2:158210379-158210438	GO:0008150|GO:0003674|GO:0005575	NM_175692
A_51_P111669	2.9769702	A	1.9753025	A	2.00231325986818	   229357	Gpr149	Mus musculus G protein-coupled receptor 149 (Gpr149)	 mRNA [NM_177346]	G protein-coupled receptor 149	Mm.95181	 62334187	chr3	 62334128	-	mm|3qE1	NM_177346	chr3:62334187-62334128	GO:0008150|GO:0007165|GO:0003674|GO:0016020|GO:0007186|GO:0005886|GO:0004930|GO:0004872|GO:0016021|GO:0005575|GO:0004871	NM_177346
A_51_P111704	2.4924436	A	2.1498775	A	1.26800997964990	    14611	Gja3	Mus musculus 0 day neonate eyeball cDNA	 RIKEN full-length enriched library	 clone:E130314M22 product:unclassifiable	 full insert sequence. [AK053849]	gap junction protein	 alpha 3	Mm.57207	 57674518	chr14	 57674459	-	mm|14qC3	AK053849	chr14:57674518-57674459	GO:0042542|GO:0005243|GO:0030054|GO:0016020|GO:0005886|GO:0005921|GO:0045121|GO:0016021|GO:0009268|GO:0042802
A_51_P111757	10.495703	P	10.255466	P	1.18118668597672	    65247	Asb1	Mus musculus ankyrin repeat and SOCS box-containing 1 (Asb1)	 transcript variant 1	 mRNA [NM_001039126]	ankyrin repeat and SOCS box-containing 1	Mm.234152	 93455991	chr1	 93455932	+	mm|1qD	NM_001039126	chr1:93455932-93455991	GO:0035556|GO:0030539|GO:0003674|GO:0007275|GO:0005575	NM_001039126
A_51_P111762	13.64717	P	13.28068	P	1.28921242697360	   433375	Creg1	Mus musculus cellular repressor of E1A-stimulated genes 1 (Creg1)	 mRNA [NM_011804]	cellular repressor of E1A-stimulated genes 1	Mm.294885	167704012	chr1	167700926	+	mm|1qH2.3	NM_011804	chr1:167700926-167704012	GO:0005667|GO:0006355|GO:0010181|GO:0016491|GO:0005576|GO:0040008|GO:0055114|GO:0008134	NM_011804
A_51_P111796	7.4970007	P	7.72515	P	0.853729360036804	   330361	AW146020	expressed sequence AW146020 [Source:MGI Symbol;Acc:MGI:2141656] [ENSMUST00000152996]	expressed sequence AW146020	Mm.474487	 81909098	chr6	 81909039	+	mm|6qC3	AK038369	chr6:81909039-81909098	GO:0008150|GO:0003674|GO:0006355|GO:0003700|GO:0005634|GO:0005575|GO:0003677|GO:0006351
A_51_P111902	8.74505	P	6.8120847	P	3.81839221469379	    59049	Slc22a17	Mus musculus solute carrier family 22 (organic cation transporter)	 member 17 (Slc22a17)	 mRNA [NM_021551]	solute carrier family 22 (organic cation transporter)	 member 17	Mm.27435	 55527474	chr14	 55527415	-	mm|14qC3	NM_021551	chr14:55527474-55527415	GO:0005515|GO:0005773|GO:0005215|GO:0005886|GO:0022857|GO:0055085|GO:0055072|GO:0016020|GO:0031301|GO:0005887|GO:0006810|GO:0004872|GO:0015891|GO:0016021|GO:0004888|GO:0006811	NM_021551
A_51_P111907	9.840785	P	8.133639	P	3.26514259864487	    59049	Slc22a17	Mus musculus solute carrier family 22 (organic cation transporter)	 member 17 (Slc22a17)	 mRNA [NM_021551]	solute carrier family 22 (organic cation transporter)	 member 17	Mm.27435	 55526738	chr14	 55526424	-	mm|14qC3	NM_021551	chr14:55526738-55526424	GO:0005515|GO:0005773|GO:0005215|GO:0005886|GO:0022857|GO:0055085|GO:0055072|GO:0016020|GO:0031301|GO:0005887|GO:0006810|GO:0004872|GO:0015891|GO:0016021|GO:0004888|GO:0006811	NM_021551
A_51_P111936	12.154963	P	12.422883	P	0.830516076404183	   240832	Tor1aip2	Mus musculus torsin A interacting protein 2 (Tor1aip2)	 transcript variant 2	 mRNA [NM_022329]	torsin A interacting protein 2	Mm.253335	157899819	chr1	157899760	+	mm|1qG3	NM_022329	chr1:157899760-157899819	GO:0005515|GO:0008150|GO:0016020|GO:0005783|GO:0016021	NM_022329
A_51_P111950	2.1785421	A	2.1560903	A	1.01568412666812	    65100	Zic5	Mus musculus zinc finger protein of the cerebellum 5 (Zic5)	 mRNA [NM_022987]	zinc finger protein of the cerebellum 5	Mm.390761	122858987	chr14	122858928	-	mm|14qE5	NM_022987	chr14:122858987-122858928	GO:0006355|GO:0003700|GO:0001843|GO:0005634|GO:0007275|GO:0003676|GO:0003677|GO:0046872|GO:0030154|GO:0007399|GO:0005622|GO:0008270|GO:0030900|GO:0045893	NM_022987
A_51_P111952	11.385243	P	12.171871	P	0.579697432101027	   110959	Nudt19	Mus musculus nudix (nucleoside diphosphate linked moiety X)-type motif 19 (Nudt19)	 nuclear gene encoding mitochondrial protein	 mRNA [NM_033080]	nudix (nucleoside diphosphate linked moiety X)-type motif 19	Mm.410206	 36332380	chr7	 36332321	-	mm|7qB2	NM_033080	chr7:36332380-36332321	GO:0005739	NM_033080
A_51_P111962	6.576003	P	6.1680155	P	1.32683364440986	    65115	Bean1	Mus musculus brain expressed	 associated with Nedd4	 1 (Bean1)	 transcript variant 1	 mRNA [NM_001141922]	brain expressed	 associated with Nedd4	 1	Mm.41849	106742983	chr8	106742924	+	mm|8qD3	NM_001141922	chr8:106742924-106742983	GO:0005515|GO:0008150|GO:0016020|GO:0016021|GO:0005575	NM_001141922
A_51_P112026	1.9586558	A	1.9573889	A	1.00087853384804	    52409	D5Ertd798e	Mus musculus 3 days neonate thymus cDNA	 RIKEN full-length enriched library	 clone:A630028H08 product:unclassifiable	 full insert sequence. [AK041660]	DNA segment	 Chr 5	 ERATO Doi 798	 expressed	Mm.452845	 46162054	chr5	 46161995	-	mm|5qB3	AK041660	chr5:46162054-46161995
A_51_P112066	11.056484	P	10.880412	P	1.12980359781601	    68020	2810002N01Rik	Mus musculus RIKEN cDNA 2810002N01 gene (2810002N01Rik)	 transcript variant 2	 mRNA [NM_026511]	RIKEN cDNA 2810002N01 gene	Mm.425762	112968319	chr12	112968260	+	mm|12qF1	NM_026511	chr12:112968260-112968319	GO:0005739|GO:0003674|GO:0008629	NM_026511
A_51_P112116	8.134145	P	8.2058525	P	0.951511171432908	    14272	Fnta	Mus musculus farnesyltransferase	 CAAX box	 alpha (Fnta)	 mRNA [NM_008033]	farnesyltransferase	 CAAX box	 alpha	Mm.3496	 27110028	chr8	 27109969	-	mm|8qA2	NM_008033	chr8:27110028-27109969	GO:0008017|GO:0018343|GO:0014070|GO:0018342|GO:0008284|GO:0010469|GO:0019840|GO:0005829|GO:0004659|GO:0004660|GO:0051789|GO:0005737|GO:0010035|GO:0008144|GO:0004662|GO:0034097|GO:0008318|GO:0005953|GO:0042277|GO:0043066|GO:0043014|GO:0005875|GO:0045213|GO:0045787|GO:0090045|GO:0030548|GO:0051774|GO:0090044|GO:0008270|GO:0051773|GO:0016740	NM_008033
A_51_P112151	10.043614	P	9.1006155	P	1.92251985789265	    68393	Mogat1	Mus musculus monoacylglycerol O-acyltransferase 1 (Mogat1)	 mRNA [NM_026713]	monoacylglycerol O-acyltransferase 1	Mm.41325	 78534615	chr1	 78534556	+	mm|1qC4	NM_026713	chr1:78534556-78534615	GO:0006629|GO:0008610|GO:0016747|GO:0005783|GO:0003846|GO:0005624|GO:0006071|GO:0016020|GO:0004144|GO:0006651|GO:0016021|GO:0016740|GO:0008415	NM_026713
A_51_P112174	8.094253	P	7.7454877	P	1.27347028823503	    52906	Ahi1	Mus musculus Abelson helper integration site 1 (Ahi1)	 transcript variant 1	 mRNA [NM_026203]	Abelson helper integration site 1	Mm.253280	 20774873	chr10	 20774814	+	mm|10qA3	NM_026203	chr10:20774814-20774873	GO:0005929|GO:0003674|GO:0005737|GO:0030054|GO:0033365|GO:0005814|GO:0060271|GO:0031513|GO:0042995|GO:0005932|GO:0016192|GO:0005856	NM_026203
A_51_P112182	3.9563787	P	4.522935	P	0.675226626177394	   208171	Tmprss7	Mus musculus transmembrane serine protease 7 (Tmprss7)	 transcript variant 2	 mRNA [NM_172455]	transmembrane serine protease 7	Mm.186306	 45667699	chr16	 45664371	-	mm|16qB5	NM_172455	chr16:45667699-45664371	GO:0005515|GO:0016787|GO:0016020|GO:0005886|GO:0004252|GO:0006508|GO:0008236|GO:0008233|GO:0016021|GO:0003824	NM_172455
A_51_P112203	13.398376	P	13.418405	P	0.98621288016447	    68625	Wdr65	WD repeat domain 65 [Source:MGI Symbol;Acc:MGI:2686209] [ENSMUST00000071972]	WD repeat domain 65	Mm.256495	118227222	chr4	118227163	-	mm|4qD2.1	AK003848	chr4:118227222-118227163
A_51_P112223	12.041198	P	12.3703575	P	0.796000090551558	    14860	Gsta4	Mus musculus glutathione S-transferase	 alpha 4 (Gsta4)	 mRNA [NM_010357]	glutathione S-transferase	 alpha 4	Mm.2662	 78047344	chr9	 78046172	+	mm|9qE1	NM_010357	chr9:78046172-78047344	GO:0043295|GO:0005737|GO:0006805|GO:0008144|GO:0008152|GO:0006749|GO:0005575|GO:0004364|GO:0042803|GO:0016740	NM_010357
A_51_P112237	10.538802	P	10.098869	P	1.35654132703744	    68737	Angel1	Mus musculus angel homolog 1 (Drosophila) (Angel1)	 mRNA [NM_144524]	angel homolog 1 (Drosophila)	Mm.63979	 88041617	chr12	 88041558	-	mm|12qD2	NM_144524	chr12:88041617-88041558	GO:0008150|GO:0003674|GO:0005575	NM_144524
A_51_P112308	12.936089	P	13.230154	P	0.815600745972958	    69068	1810011O10Rik	Mus musculus RIKEN cDNA 1810011O10 gene (1810011O10Rik)	 mRNA [NM_026931]	RIKEN cDNA 1810011O10 gene	Mm.25775	 25548213	chr8	 25548154	-	mm|8qA2	NM_026931	chr8:25548213-25548154	GO:0008150|GO:0003674|GO:0006915|GO:0005575	NM_026931
A_51_P112319	1.8882306	A	2.6699371	A	0.581678344622483	    15431	Hoxd11	Mus musculus homeobox D11 (Hoxd11)	 mRNA [NM_008273]	homeobox D11	Mm.207763	 74522087	chr2	 74522028	+	mm|2qC3	NM_008273	chr2:74522028-74522087	GO:0001656|GO:0007389|GO:0001658|GO:0006355|GO:0010720|GO:0003700|GO:0009954|GO:0005634|GO:0007275|GO:0030326|GO:0001759|GO:0009953|GO:0009952|GO:0003677|GO:0006351|GO:0043565|GO:0001501|GO:0048589|GO:0060351|GO:0032332|GO:0042733	NM_008273
A_51_P112322	9.913239	P	9.486123	P	1.34454309789239	    15574	Hus1	Mus musculus Hus1 homolog (S. pombe) (Hus1)	 mRNA [NM_008316]	Hus1 homolog (S. pombe)	Mm.42201	  8893379	chr11	  8893320	-	mm|11qA1	NM_008316	chr11:8893379-8893320	GO:0005794|GO:0031575|GO:0005730|GO:0005634|GO:0009790|GO:0006974|GO:0006260|GO:0005737|GO:0006281|GO:0000724|GO:0004674|GO:0006468|GO:0000077|GO:0008156|GO:0009411	NM_008316
A_51_P112355	14.616128	P	15.887924	P	0.4141438873114	    16145	Igtp	Mus musculus interferon gamma induced GTPase (Igtp)	 mRNA [NM_018738]	interferon gamma induced GTPase	Mm.33902	 58020986	chr11	 58020927	+	mm|11qB1.3	NM_018738	chr11:58020927-58020986	GO:0006184|GO:0035458|GO:0003924|GO:0005829	NM_018738
A_51_P112405	10.432802	P	10.843386	P	0.752318774958775	    18793	Plaur	Mus musculus plasminogen activator	 urokinase receptor (Plaur)	 mRNA [NM_011113]	plasminogen activator	 urokinase receptor	Mm.1359	 25259374	chr7	 25259315	+	mm|7qA3	NM_011113	chr7:25259315-25259374	GO:0005515|GO:0043066|GO:0005886|GO:0009986|GO:0060742|GO:0016255|GO:0048762|GO:0005576|GO:0031225|GO:0010628|GO:0016310|GO:0016020|GO:0016301|GO:0030377|GO:0010629|GO:0004872|GO:0019899	NM_011113
A_51_P112427	1.9688663	A	1.9905944	A	0.98505207493428	100502942	Gm4814	Mus musculus predicted gene 4814 (Gm4814)	 non-coding RNA [NR_036451]	predicted gene 4814	Mm.441946	 93843404	chr13	 93843345	+	mm|13qC3	NR_036451	chr13:93843345-93843404	GO:0008150|GO:0003674|GO:0005575	NR_036451
A_51_P112445	10.754029	P	11.106029	P	0.78349718694934	   269470	Wdr3	Mus musculus WD repeat domain 3 (Wdr3)	 mRNA [NM_175552]	WD repeat domain 3	Mm.24591	 99942517	chr3	 99942458	-	mm|3qF2.2	NM_175552	chr3:99942517-99942458	GO:0031965|GO:0005730|GO:0005634	NM_175552
A_51_P112456	1.8757259	A	1.8715653	A	1.002888070623	NA		Mus musculus adult male testis cDNA	 RIKEN full-length enriched library	 clone:4930407G06 product:unclassifiable	 full insert sequence. [AK029592]			 91015714	chr7	 91015655	-	mm|7qD3	AK029592	chr7:91015714-91015655
A_51_P112465	2.90941	A	3.5203958	A	0.654749156003014	   667742	Fam38b	Mus musculus adult male liver tumor cDNA	 RIKEN full-length enriched library	 clone:C730029D16 product:hypothetical protein	 full insert sequence. [AK050232]	family with sequence similarity 38	 member B	Mm.158720	 63239484	chr18	 63239425	-	mm|18qE1	AK050232	chr18:63239484-63239425	GO:0008150|GO:0003674|GO:0016020|GO:0006810|GO:0016021|GO:0005575|GO:0005216|GO:0006811
A_51_P112476	5.3186846	P	4.124423	P	2.28827683585695	NA					NA		NA
A_51_P112518	4.3417945	P	5.2258153	P	0.541855171190083	NA		Mus musculus adult male epididymis cDNA	 RIKEN full-length enriched library	 clone:9230111E06 product:unclassifiable	 full insert sequence. [AK033800]		Mm.297629	 41152248	chr10	 41152189	+	mm|10qB1	AK033800	chr10:41152189-41152248
A_51_P112529	9.832642	P	10.696481	P	0.549488426459873	    19679	Pitpnm2	Mus musculus phosphatidylinositol transfer protein	 membrane-associated 2 (Pitpnm2)	 mRNA [NM_011256]	phosphatidylinositol transfer protein	 membrane-associated 2	Mm.44261	124569241	chr5	124569182	-	mm|5qF	NM_011256	chr5:124569241-124569182	GO:0005622|GO:0008150|GO:0005737|GO:0005543|GO:0016020|GO:0006810|GO:0005625|GO:0005856|GO:0046872|GO:0043231|GO:0008289	NM_011256
A_51_P112557	12.849839	P	12.890249	P	0.972378567542263	    20016	Polr1c	Mus musculus polymerase (RNA) I polypeptide C (Polr1c)	 mRNA [NM_009085]	polymerase (RNA) I polypeptide C	Mm.3458	 46381264	chr17	 46381120	-	mm|17qC	NM_009085	chr17:46381264-46381120	GO:0005654	NM_009085
A_51_P112592	7.960933	P	6.968548	P	1.98947118010312	   234857	Spire2	Mus musculus spire homolog 2 (Drosophila) (Spire2)	 mRNA [NM_172287]	spire homolog 2 (Drosophila)	Mm.150200	125892601	chr8	125887283	+	mm|8qE1	NM_172287	chr8:125887283-125892601	GO:0008150|GO:0003674|GO:0005737|GO:0006810|GO:0003779|GO:0005575|GO:0005856	NM_172287
A_51_P112627	13.9661875	P	13.752073	P	1.15999171400312	    20446	St6galnac2	Mus musculus ST6 (alpha-N-acetyl-neuraminyl-2	3-beta-galactosyl-1	3)-N-acetylgalactosaminide alpha-2	6-sialyltransferase 2 (St6galnac2)	 mRNA [NM_009180]	ST6 (alpha-N-acetyl-neuraminyl-2	3-beta-galactosyl-1	3)-N-acetylgalactosaminide alpha-2	6-sialyltransferase 2	Mm.3947	116538094	chr11	116538040	-	mm|11qE2	NM_009180	chr11:116538094-116538040	GO:0030173|GO:0008373|GO:0005794|GO:0016020|GO:0016757|GO:0006486|GO:0016021|GO:0016740	NM_009180
A_51_P112639	7.4648757	P	7.8309793	P	0.775875136643606	    20585	Hltf	Mus musculus helicase-like transcription factor (Hltf)	 transcript variant 1	 mRNA [NM_009210]	helicase-like transcription factor	Mm.209650	 20016597	chr3	 20016539	+	mm|3qA2	NM_009210	chr3:20016539-20016597	GO:0006200|GO:0006357|GO:0016874|GO:0004386|GO:0005634|GO:0016818|GO:0003676|GO:0003824|GO:0003677|GO:0005524|GO:0046872|GO:0006351|GO:0016787|GO:0000166|GO:0008152|GO:0008270|GO:0016887|GO:0016568	NM_009210
A_51_P112644	10.475378	P	10.616077	P	0.907079559823615	   215194	Kri1	Mus musculus KRI1 homolog (S. cerevisiae) (Kri1)	 mRNA [NM_145416]	KRI1 homolog (S. cerevisiae)	Mm.290690	 21078265	chr9	 21078206	-	mm|9qA3	NM_145416	chr9:21078265-21078206	GO:0008150|GO:0003674|GO:0005575	NM_145416
A_51_P112661	5.5318675	P	6.3926706	P	0.55064594645391	NA		Mus musculus 0 day neonate head cDNA	 RIKEN full-length enriched library	 clone:4832416C21 product:unclassifiable	 full insert sequence. [AK029296]			130812224	chr3	130812165	-	mm|3qG3	AK029296	chr3:130812224-130812165
A_51_P112662	10.870545	P	10.952328	P	0.94488915386302	    20687	Sp3	Mus musculus trans-acting transcription factor 3 (Sp3)	 transcript variant 1	 mRNA [NM_001018042]	trans-acting transcription factor 3	Mm.124328	 72774796	chr2	 72774737	-	mm|2qC3	NM_001018042	chr2:72774796-72774737	GO:0005515|GO:0003700|GO:0030324|GO:0048706|GO:0005634|GO:0043353|GO:0048596|GO:0046872|GO:0005622|GO:0003690|GO:0017053|GO:0030183|GO:0001779|GO:0030224|GO:0030851|GO:0006355|GO:0060136|GO:0001892|GO:0060216|GO:0000122|GO:0003676|GO:0001829|GO:0003677|GO:0001701|GO:0006351|GO:0001889|GO:0001078|GO:0001503|GO:0030217|GO:0003682|GO:0030219|GO:0030218|GO:0008270|GO:0045893|GO:0045892	NM_001018042
A_51_P112677	12.184953	P	11.557305	P	1.54504408138596	    28028	Mrpl50	Mus musculus mitochondrial ribosomal protein L50 (Mrpl50)	 nuclear gene encoding mitochondrial protein	 mRNA [NM_178603]	mitochondrial ribosomal protein L50	Mm.30052	 49525661	chr4	 49525602	-	mm|4qB1	NM_178603	chr4:49525661-49525602	GO:0005739|GO:0008150|GO:0003674|GO:0030529|GO:0005840	NM_178603
A_51_P112682	5.430684	P	6.347586	P	0.529645144079758	    29849	Olfr159	Mus musculus olfactory receptor 159 (Olfr159)	 mRNA [NM_019476]	olfactory receptor 159	Mm.88845	 43783449	chr4	 43783390	-	mm|4qB1	NM_019476	chr4:43783449-43783390	GO:0007608|GO:0007165|GO:0004984|GO:0007186|GO:0005887|GO:0004930|GO:0004872|GO:0016021|GO:0004871	NM_019476
A_51_P112734	8.480454	P	8.130517	P	1.27450497067385	    50934	Slc7a8	Mus musculus solute carrier family 7 (cationic amino acid transporter	 y+ system)	 member 8 (Slc7a8)	 mRNA [NM_016972]	solute carrier family 7 (cationic amino acid transporter	 y+ system)	 member 8	Mm.276831	 55341196	chr14	 55341137	-	mm|14qC3	NM_016972	chr14:55341196-55341137	GO:0019534|GO:0005886|GO:0015695|GO:0006865|GO:0005275|GO:0055085|GO:0003333|GO:0015101|GO:0005737|GO:0015171|GO:0016020|GO:0006810|GO:0016021|GO:0015179|GO:0015807	NM_016972
A_51_P112762	7.290658	P	8.170947	P	0.543258595053139	    53881	Slc5a3	Mus musculus solute carrier family 5 (inositol transporters)	 member 3 (Slc5a3)	 mRNA [NM_017391]	solute carrier family 5 (inositol transporters)	 member 3	Mm.217354	 92079425	chr16	 92079366	+	mm|16qC4	NM_017391	chr16:92079366-92079425	GO:0043576|GO:0006020|GO:0016020|GO:0005886|GO:0007422|GO:0006810|GO:0016021|GO:0006814|GO:0005367|GO:0015798|GO:0006811	NM_017391
A_51_P112789	12.6863575	P	12.186033	P	1.41453169191715	    54214	Golga4	Mus musculus golgi autoantigen	 golgin subfamily a	 4 (Golga4)	 mRNA [NM_018748]	golgi autoantigen	 golgin subfamily a	 4	Mm.10409	118491373	chr9	118491314	+	mm|9qF3	NM_018748	chr9:118491314-118491373	GO:0005737|GO:0005794|GO:0016020|GO:0043001	NM_018748
A_51_P112796	2.771854	A	2.5113764	A	1.19787519208793	    54450	Il1f5	Mus musculus interleukin 1 family	 member 5 (delta) (Il1f5)	 transcript variant 2	 mRNA [NM_019451]	interleukin 1 family	 member 5 (delta)	Mm.29261	 24137520	chr2	 24137461	+	mm|2qA3	NM_019451	chr2:24137461-24137520	GO:0008150|GO:0003674|GO:0005576|GO:0005575|GO:0005152|GO:0005615|GO:0005125	NM_019451
A_51_P112817	7.562989	P	7.0543394	P	1.42271787129848	   104086	Cyp27a1	Mus musculus cytochrome P450	 family 27	 subfamily a	 polypeptide 1 (Cyp27a1)	 nuclear gene encoding mitochondrial protein	 mRNA [NM_024264]	cytochrome P450	 family 27	 subfamily a	 polypeptide 1	Mm.85083	 74782262	chr1	 74782203	+	mm|1qC3	NM_024264	chr1:74782203-74782262	GO:0030343|GO:0005506|GO:0008395|GO:0005743|GO:0009055|GO:0005740|GO:0046872|GO:0005739|GO:0031073|GO:0004497|GO:0016020|GO:0047749|GO:0005759|GO:0016491|GO:0016705|GO:0055114|GO:0008203|GO:0020037	NM_024264
A_51_P112833	2.7092714	A	2.6788669	A	1.02129843521581	    76645	Pkd1l2	polycystic kidney disease 1 like 2 [Source:MGI Symbol;Acc:MGI:2664668] [ENSMUST00000160449]	polycystic kidney disease 1 like 2	Mm.159753	119547573	chr8	119547514	-	mm|8qE1	AK007293	chr8:119547573-119547514	GO:0008150|GO:0001965|GO:0016020|GO:0007218|GO:0005488|GO:0005509|GO:0005529|GO:0016021|GO:0005575
A_51_P112889	3.1493368	A	4.5549555	P	0.377456239507354	NA		Mus musculus adult male spinal cord cDNA	 RIKEN full-length enriched library	 clone:A330086K22 product:unclassifiable	 full insert sequence. [AK039684]		Mm.483557	 15584939	chr18	 15584880	+	mm|18qA1	AK039684	chr18:15584880-15584939
A_51_P112912	11.71602	P	11.843431	P	0.915472846164826	    66922	Rras2	Mus musculus related RAS viral (r-ras) oncogene homolog 2 (Rras2)	 mRNA [NM_025846]	related RAS viral (r-ras) oncogene homolog 2	Mm.276572	121190320	chr7	121190282	-	mm|7qF1	NM_025846	chr7:121190320-121190282	GO:0005515|GO:0030335|GO:0005886|GO:0007264|GO:0009987|GO:0003924|GO:0007265|GO:0005525|GO:0005622|GO:0006184|GO:0007165|GO:0000166|GO:0016020	NM_025846
A_51_P112932	11.414921	P	10.185155	P	2.34528947000913	    12496	Entpd2	Mus musculus ectonucleoside triphosphate diphosphohydrolase 2 (Entpd2)	 mRNA [NM_009849]	ectonucleoside triphosphate diphosphohydrolase 2	Mm.482100	 25256796	chr2	 25256737	+	mm|2qA3	NM_009849	chr2:25256737-25256796	GO:0005515|GO:0017111|GO:0017110|GO:0016787|GO:0016020|GO:0007186|GO:0000166|GO:0009181|GO:0005605|GO:0030168|GO:0016021|GO:0005524	NM_009849
A_51_P112966	9.889904	P	10.813597	P	0.527157876895574	    12642	Ch25h	Mus musculus cholesterol 25-hydroxylase (Ch25h)	 mRNA [NM_009890]	cholesterol 25-hydroxylase	Mm.30824	 34548477	chr19	 34548418	-	mm|19qC1	NM_009890	chr19:34548477-34548418	GO:0006694|GO:0008610|GO:0001567|GO:0005506|GO:0005783|GO:0008395|GO:0046872|GO:0005829|GO:0004497|GO:0016020|GO:0016491|GO:0016126|GO:0006633|GO:0016021|GO:0055114|GO:0008203	NM_009890
A_51_P113003	9.802397	P	9.687808	P	1.08266656775626	    83815	Cenpq	Mus musculus centromere protein Q (Cenpq)	 mRNA [NM_031863]	centromere protein Q	Mm.9870	 41060530	chr17	 41060471	-	mm|17qB2	NM_031863	chr17:41060530-41060471	GO:0005694|GO:0005634|GO:0000775	NM_031863
A_51_P113026	3.5670166	A	3.11519	A	1.36777089928418	    12957	Cryba1	Mus musculus crystallin	 beta A1 (Cryba1)	 mRNA [NM_009965]	crystallin	 beta A1	Mm.22830	 77533002	chr11	 77532943	-	mm|11qB5	NM_009965	chr11:77533002-77532943	GO:0005737|GO:0005212|GO:0043010|GO:0005634|GO:0005625|GO:0007601|GO:0042803	NM_009965
A_51_P113033	1.8695816	A	1.8732799	A	0.997439816655882	   319566	D030034A15Rik	Mus musculus 9 days embryo whole body cDNA	 RIKEN full-length enriched library	 clone:D030034A15 product:unclassifiable	 full insert sequence. [AK083501]	RIKEN cDNA D030034A15 gene		 38889391	chr10	 38889332	-	mm|10qB1	AK083501	chr10:38889391-38889332	GO:0008150|GO:0003674|GO:0005575
A_51_P113058	5.3872547	P	5.7638702	P	0.770242428113992	   258652	Olfr1131	Mus musculus olfactory receptor 1131 (Olfr1131)	 mRNA [NM_146658]	olfactory receptor 1131	Mm.377615	 87468945	chr2	 87468886	+	mm|2qD	NM_146658	chr2:87468886-87468945	GO:0007608|GO:0007165|GO:0004984|GO:0007186|GO:0004930|GO:0004872|GO:0016021|GO:0004871	NM_146658
A_51_P113068	5.792606	P	6.3865376	P	0.662534919398043	   214150	Eif2c3	Mus musculus eukaryotic translation initiation factor 2C	 3 (Eif2c3)	 mRNA [NM_153402]	eukaryotic translation initiation factor 2C	 3	Mm.482388	126022727	chr4	126022668	-	mm|4qD2.2	NM_153402	chr4:126022727-126022668	GO:0035278|GO:0003674|GO:0003743|GO:0005575|GO:0006402|GO:0006413	NM_153402
A_51_P113072	12.426212	P	11.974448	P	1.36771155160621	    98828	Cdc123	Mus musculus cell division cycle 123 homolog (S. cerevisiae) (Cdc123)	 mRNA [NM_133837]	cell division cycle 123 homolog (S. cerevisiae)	Mm.181490	  5716611	chr2	  5715884	-	mm|2qA1	NM_133837	chr2:5716611-5715884	GO:0003674|GO:0007049|GO:0005737|GO:0000080|GO:0051301	NM_133837
A_51_P113106	8.91763	P	8.8064995	P	1.08007425429466	    13543	Dvl2	Mus musculus dishevelled 2	 dsh homolog (Drosophila) (Dvl2)	 mRNA [NM_007888]	dishevelled 2	 dsh homolog (Drosophila)	Mm.5114	 69823351	chr11	 69823292	+	mm|11qB3	NM_007888	chr11:69823292-69823351	GO:0005515|GO:0006366|GO:0005886|GO:0061098|GO:0030136|GO:0042802|GO:0007507|GO:0005109|GO:0044340|GO:0060029|GO:0005737|GO:0051091|GO:0090103|GO:0043507|GO:0016055|GO:0022007|GO:0060070|GO:0005938|GO:0060071|GO:0007379|GO:0019904|GO:0090179|GO:0001843|GO:0045177|GO:0044444|GO:0003007|GO:0001934|GO:0034613|GO:0045893|GO:0035567	NM_007888
A_51_P113129	4.3351035	P	2.094886	A	4.72468288291321	    67821	Atp1b4	Mus musculus ATPase	 (Na+)/K+ transporting	 beta 4 polypeptide (Atp1b4)	 mRNA [NM_133690]	ATPase	 (Na+)/K+ transporting	 beta 4 polypeptide	Mm.60134	 35689606	chrX	 35689547	+	mm|XqA3.3	NM_133690	chrX:35689547-35689606	GO:0005515|GO:0006355|GO:0005637|GO:0005634|GO:0005635|GO:0006351|GO:0006754|GO:0016020|GO:0006810|GO:0016021|GO:0006814|GO:0000785|GO:0006813|GO:0005391|GO:0006811	NM_133690
A_51_P113137	9.75991	P	10.093813	P	0.793387185004663	    13709	Elf1	Mus musculus E74-like factor 1 (Elf1)	 mRNA [NM_007920]	E74-like factor 1	Mm.20938	 79982000	chr14	 79981941	+	mm|14qD3	NM_007920	chr14:79981941-79982000	GO:0043565|GO:0006355|GO:0005737|GO:0003700|GO:0045944|GO:0005634|GO:0045893|GO:0003677|GO:0001817|GO:0050860|GO:0006351	NM_007920
A_51_P113144	10.579907	P	10.7520275	P	0.88753720330738	   108012	Ap1s2	adaptor-related protein complex 1	 sigma 2 subunit [Source:MGI Symbol;Acc:MGI:1889383] [ENSMUST00000033734]	adaptor-related protein complex 1	 sigma 2 subunit	Mm.426783	160371167	chrX	160371108	+	mm|XqF5	AK167690	chrX:160371108-160371167	GO:0005794|GO:0006892|GO:0031410|GO:0015031|GO:0006886|GO:0030117|GO:0005829|GO:0006897|GO:0003674|GO:0005905|GO:0016020|GO:0008565|GO:0006810|GO:0016192|GO:0016044
A_51_P113162	7.7948694	P	7.513693	P	1.21518536494914	    18286	Odf2	Mus musculus 0 day neonate lung cDNA	 RIKEN full-length enriched library	 clone:E030004E15 product:unclassifiable	 full insert sequence. [AK086843]	outer dense fiber of sperm tails 2		 29750580	chr2	 29750521	+	mm|2qB	AK086843	chr2:29750521-29750580	GO:0005813|GO:0005814|GO:0005874|GO:0007275|GO:0042995|GO:0007283|GO:0001520|GO:0030154|GO:0005829|GO:0019861|GO:0005929|GO:0005737|GO:0005200|GO:0005856
A_51_P113178	5.153561	P	5.9131413	P	0.590668139278082	   109050	6530418L21Rik	Mus musculus RIKEN cDNA 6530418L21 gene (6530418L21Rik)	 transcript variant 1	 mRNA [NM_175398]	RIKEN cDNA 6530418L21 gene	Mm.212591	105520880	chr3	105520821	+	mm|3qF2.2	NM_175398	chr3:105520821-105520880	GO:0008150|GO:0003674|GO:0005575	NM_175398
A_51_P113182	7.01992	P	7.33066	P	0.80622811543489	    16880	Lifr	Mus musculus leukemia inhibitory factor receptor (Lifr)	 transcript variant 1	 mRNA [NM_013584]	leukemia inhibitory factor receptor	Mm.149720	  7141209	chr15	  7141150	+	mm|15qA1	NM_013584	chr15:7141150-7141209	GO:0005515|GO:0008284|GO:0004896|GO:0005886|GO:0031100|GO:0004923|GO:0019221|GO:0005576|GO:0070120|GO:0045768|GO:0005127|GO:0048861|GO:0019955|GO:0016020|GO:0019838|GO:0048812|GO:0004872|GO:0016021|GO:0034097	NM_013584
A_51_P113195	8.544174	P	9.786287	P	0.422753029993948	    22268	Upk1b	Mus musculus uroplakin 1B (Upk1b)	 mRNA [NM_178924]	uroplakin 1B	Mm.485869	 38773918	chr16	 38773859	-	mm|16qB4	NM_178924	chr16:38773918-38773859	GO:0016324|GO:0016020|GO:0030855|GO:0016021	NM_178924
A_51_P113205	2.8151999	A	3.7454562	A	0.524765107107862	    14060	F13b	Mus musculus coagulation factor XIII	 beta subunit (F13b)	 mRNA [NM_031164]	coagulation factor XIII	 beta subunit	Mm.30105	141420096	chr1	141420037	+	mm|1qF	NM_031164	chr1:141420037-141420096	GO:0008150|GO:0003674|GO:0005576	NM_031164
A_51_P113213	2.422995	A	2.1524942	A	1.20622647013770	NA		Mus musculus 9.5 days embryo parthenogenote cDNA	 RIKEN full-length enriched library	 clone:B130021B20 product:unclassifiable	 full insert sequence. [AK045039]		Mm.387683	 17460908	chr3	 17460849	-	mm|3qA1	AK045039	chr3:17460908-17460849
A_51_P113222	11.680011	P	11.821945	P	0.906303398627572	    69940	Exoc1	Mus musculus exocyst complex component 1 (Exoc1)	 mRNA [NM_027270]	exocyst complex component 1	Mm.485852	 76999056	chr5	 76998997	+	mm|5qC3.3	NM_027270	chr5:76998997-76999056	GO:0008150|GO:0003674|GO:0005575	NM_027270
A_51_P113242	6.451082	P	6.6134214	P	0.893574920416494	   110350	Dync2h1	Mus musculus dynein cytoplasmic 2 heavy chain 1 (Dync2h1)	 mRNA [NM_029851]	dynein cytoplasmic 2 heavy chain 1	Mm.237596	  7165624	chr9	  7162893	-	mm|9qA1	NM_029851	chr9:7165624-7162893	GO:0007368|GO:0005886|GO:0042995|GO:0009953|GO:0030326|GO:0035085|GO:0005737|GO:0003774|GO:0000166|GO:0008105|GO:0016485|GO:0007030|GO:0005856|GO:0016887|GO:0007018|GO:0017111|GO:0005794|GO:0005874|GO:0045177|GO:0007275|GO:0031512|GO:0003777|GO:0005524|GO:0042384|GO:0005929|GO:0016020|GO:0030286|GO:0030030|GO:0030900	NM_029851
A_51_P113274	11.166162	P	11.013662	P	1.11149387633353	    20170	Hps6	Mus musculus Hermansky-Pudlak syndrome 6 (Hps6)	 mRNA [NM_176785]	Hermansky-Pudlak syndrome 6	Mm.101110	 46080569	chr19	 46080510	+	mm|19qC3	NM_176785	chr19:46080510-46080569	GO:0005515|GO:0005792|GO:0005737|GO:0006996|GO:0016020|GO:0007596|GO:0005783|GO:0043473|GO:0030318|GO:0005768	NM_176785
A_51_P113321	2.672354	A	3.1982715	A	0.694517282469448	   258715	Olfr421	Mus musculus olfactory receptor 421 (Olfr421)	 mRNA [NM_146720]	olfactory receptor 421	Mm.377650	176082299	chr1	176082240	+	mm|1qH3	NM_146720	chr1:176082240-176082299	GO:0007608|GO:0007165|GO:0004984|GO:0007186|GO:0004930|GO:0004872|GO:0016021|GO:0004871	NM_146720
A_51_P113322	4.7783074	P	2.5738342	A	4.60906208116656	   243880	Nlrp4a	Mus musculus NLR family	 pyrin domain containing 4A (Nlrp4a)	 mRNA [NM_172896]	NLR family	 pyrin domain containing 4A	Mm.322356	 27260220	chr7	 27260161	+	mm|7qA3	NM_172896	chr7:27260161-27260220	GO:0003674|GO:0000166|GO:0006952|GO:0005575|GO:0005524	NM_172896
A_51_P113335	5.144794	P	4.9719343	P	1.12729077942161	NA		Mus musculus 13 days embryo forelimb cDNA	 RIKEN full-length enriched library	 clone:5930414A15 product:hypothetical EF-hand containing protein	 full insert sequence. [AK031145]		Mm.297074	166865664	chr2	166865605	+	mm|2qH3	AK031145	chr2:166865605-166865664
A_51_P113395	7.268431	P	8.134811	P	0.548521471438117	    18115	Nnt	M.musculus mRNA for NADP transhydrogenase. [Z49204]	nicotinamide nucleotide transhydrogenase	Mm.195803	120124880	chr13	120124822	-	mm|13qD2.3	Z49204	chr13:120124880-120124822	GO:0050661|GO:0005739|GO:0005743
A_51_P113399	7.4785666	P	8.021267	P	0.686484760984949	    18115	Nnt	Mus musculus nicotinamide nucleotide transhydrogenase (Nnt)	 nuclear gene encoding mitochondrial protein	 transcript variant 1	 mRNA [NM_008710]	nicotinamide nucleotide transhydrogenase	Mm.195803	120125167	chr13	120125108	-	mm|13qD2.3	NM_008710	chr13:120125167-120125108	GO:0050661|GO:0005739|GO:0005743	NM_008710
A_51_P113403	10.242521	P	10.76045	P	0.698373634763825	   268512	Slc26a11	Mus musculus solute carrier family 26	 member 11 (Slc26a11)	 mRNA [NM_178743]	solute carrier family 26	 member 11	Mm.31869	119242278	chr11	119242219	+	mm|11qE2	NM_178743	chr11:119242219-119242278	GO:0005215|GO:0008509|GO:0005794|GO:0005886|GO:0005783|GO:0005765|GO:0055085|GO:0005764|GO:0016020|GO:0015301|GO:0006810|GO:0008272|GO:0008271|GO:0016021|GO:0006811	NM_178743
A_51_P113430	10.44438	P	10.668186	P	0.856303424399863	    72565	Uaca	Mus musculus uveal autoantigen with coiled-coil domains and ankyrin repeats (Uaca)	 mRNA [NM_028283]	uveal autoantigen with coiled-coil domains and ankyrin repeats	Mm.68819	 60721877	chr9	 60720069	+	mm|9qB	NM_028283	chr9:60720069-60721877	GO:0005515|GO:0048471|GO:0042347|GO:0043065|GO:0008630|GO:0008631|GO:0005624|GO:0005625|GO:0005634|GO:0005635|GO:0005829|GO:0043280|GO:0005737|GO:0043293|GO:0050728|GO:0042307|GO:0005856|GO:0009411	NM_028283
A_51_P113475	4.7325716	P	5.095435	P	0.777619660462924	    18559	Pctp	Mus musculus phosphatidylcholine transfer protein (Pctp)	 mRNA [NM_008796]	phosphatidylcholine transfer protein	Mm.5062	 89847431	chr11	 89846036	-	mm|11qC	NM_008796	chr11:89847431-89846036	GO:0005737|GO:0015914|GO:0008525|GO:0006869|GO:0006810|GO:0031210|GO:0008289|GO:0008203	NM_008796
A_51_P113518	8.73854	P	2.0887442	A	100.412551066741	    17933	Myt1l	Mus musculus myelin transcription factor 1-like (Myt1l)	 transcript variant 1	 mRNA [NM_001093775]	myelin transcription factor 1-like	Mm.253067	 30607633	chr12	 30607574	+	mm|12qA2	NM_001093775	chr12:30607574-30607633	GO:0005515|GO:0006355|GO:0003700|GO:0008270|GO:0007275|GO:0005634|GO:0003677|GO:0046872|GO:0030154|GO:0006351|GO:0007399	NM_001093775
A_51_P113527	14.323706	P	14.210711	P	1.08147101538420	    13681	Eif4a1	Mus musculus eukaryotic translation initiation factor 4A1 (Eif4a1)	 transcript variant 1	 mRNA [NM_144958]	eukaryotic translation initiation factor 4A1	Mm.371557	 69480659	chr11	 69480600	-	mm|11qB3	NM_144958	chr11:69480659-69480600	GO:0008026|GO:0016787|GO:0000166|GO:0003723|GO:0004386|GO:0003743|GO:0003676|GO:0006412|GO:0005524|GO:0006413|GO:0005829	NM_144958
A_51_P113550	3.734186	A	4.233304	P	0.707539207197426	NA		Mus musculus 16 days neonate cerebellum cDNA	 RIKEN full-length enriched library	 clone:9630032F10 product:unclassifiable	 full insert sequence. [AK036070]			 40682933	chr15	 40682874	+	mm|15qB3.1	AK036070	chr15:40682874-40682933
A_51_P113588	8.774117	P	11.115112	P	0.197374155720651	    18300	Oit1	Mus musculus oncoprotein induced transcript 1 (Oit1)	 mRNA [NM_146050]	oncoprotein induced transcript 1	Mm.25351	  9184612	chr14	  9181838	-	mm|14qA1	NM_146050	chr14:9184612-9181838	GO:0005576|GO:0046676	NM_146050
A_51_P113672	8.580686	P	8.573044	P	1.00531108482523	    56784	Ralgapa1	Mus musculus Ral GTPase activating protein	 alpha subunit 1 (Ralgapa1)	 transcript variant 3	 mRNA [NM_001003719]	Ral GTPase activating protein	 alpha subunit 1	Mm.292180	 56741673	chr12	 56741614	-	mm|12qC1	NM_001003719	chr12:56741673-56741614	GO:0043547|GO:0005739|GO:0005622|GO:0005515|GO:0051056|GO:0005098|GO:0006355|GO:0005737|GO:0046982|GO:0005634|GO:0005829|GO:0005096	NM_001003719
A_51_P113722	12.933899	P	12.750247	P	1.13575527028613	   101358	Fbxl14	Mus musculus F-box and leucine-rich repeat protein 14 (Fbxl14)	 mRNA [NM_133940]	F-box and leucine-rich repeat protein 14	Mm.125477	119432331	chr6	119432272	+	mm|6qF1	NM_133940	chr6:119432272-119432331	GO:0008150|GO:0003674|GO:0005737|GO:0005575	NM_133940
A_51_P113747	11.887389	P	12.27753	P	0.763055024604966	   101943	Sf3b3	Mus musculus 8 days embryo whole body cDNA	 RIKEN full-length enriched library	 clone:5730409A01 product:hypothetical protein	 full insert sequence. [AK017529]	splicing factor 3b	 subunit 3	Mm.236123	113370200	chr8	113370141	-	mm|8qE1	AK017529	chr8:113370200-113370141	GO:0008380|GO:0006397|GO:0003674|GO:0005681|GO:0005634|GO:0071013|GO:0003676|GO:0005689
A_51_P113753	3.1820686	A	4.284603	A	0.4656976799645	   104443	Npffr2	Mus musculus neuropeptide FF receptor 2 (Npffr2)	 mRNA [NM_133192]	neuropeptide FF receptor 2	Mm.447881	 89997119	chr5	 89997060	+	mm|5qE1	NM_133192	chr5:89997060-89997119	GO:0007165|GO:0003674|GO:0016020|GO:0007186|GO:0005886|GO:0005887|GO:0004930|GO:0004872|GO:0016021|GO:0004871|GO:0015629|GO:0008188	NM_133192
A_51_P113769	7.5244436	P	7.8656282	P	0.789392873497045	NA		Mus musculus 16 days neonate thymus cDNA	 RIKEN full-length enriched library	 clone:A130057G06 product:unclassifiable	 full insert sequence. [AK037868]		Mm.21652	  5031240	chr16	  5031181	-	mm|16qA1	AK037868	chr16:5031240-5031181
A_51_P113773	8.522193	P	8.867057	P	0.787382198028873	    75764	Slx1b	Mus musculus SLX1 structure-specific endonuclease subunit homolog B (S. cerevisiae) (Slx1b)	 transcript variant 1	 mRNA [NM_029420]	SLX1 structure-specific endonuclease subunit homolog B (S. cerevisiae)	Mm.280573	133835161	chr7	133835102	-	mm|7qF3	NM_029420	chr7:133835161-133835102	GO:0005622|GO:0004518|GO:0006281|GO:0004519|GO:0016787|GO:0006310|GO:0005634|GO:0046872|GO:0006974	NM_029420
A_51_P113784	10.632694	P	10.500891	P	1.09566214357267	    28000	Prpf19	Mus musculus PRP19/PSO4 pre-mRNA processing factor 19 homolog (S. cerevisiae) (Prpf19)	 mRNA [NM_134129]	PRP19/PSO4 pre-mRNA processing factor 19 homolog (S. cerevisiae)	Mm.485402	 10978228	chr19	 10978169	+	mm|19qA	NM_134129	chr19:10978169-10978228	GO:0005515|GO:0008380|GO:0004842|GO:0016567|GO:0001833|GO:0034450|GO:0000151|GO:0005634|GO:0071013|GO:0042802|GO:0005737|GO:0005681|GO:0005856|GO:0005811|GO:0000209|GO:0006397|GO:0000245|GO:0008610|GO:0003677|GO:0006974|GO:0006281|GO:0048711|GO:0016607|GO:0045665|GO:0045666	NM_134129
A_51_P113806	4.6280127	P	5.1377077	P	0.702370910331114	    64450	Gpr85	Mus musculus G protein-coupled receptor 85 (Gpr85)	 mRNA [NM_145066]	G protein-coupled receptor 85	Mm.167625	 13785672	chr6	 13785613	-	mm|6qA1	NM_145066	chr6:13785672-13785613	GO:0007165|GO:0016020|GO:0007186|GO:0005886|GO:0005887|GO:0004930|GO:0004872|GO:0016021|GO:0005057|GO:0004871	NM_145066
A_51_P113825	6.789746	P	7.3626633	P	0.672256031887088	   434350	9430091E24Rik	Mus musculus 4 days neonate male adipose cDNA	 RIKEN full-length enriched library	 clone:B430210D09 product:unclassifiable	 full insert sequence. [AK080922]	RIKEN cDNA 9430091E24 gene	Mm.446714	113667501	chr8	113667442	-	mm|8qE1	AK080922	chr8:113667501-113667442	GO:0008150|GO:0003674|GO:0005575
A_51_P113865	6.180583	P	6.3835516	P	0.868761093374953	    76071	Jakmip1	Mus musculus janus kinase and microtubule interacting protein 1 (Jakmip1)	 mRNA [NM_178394]	janus kinase and microtubule interacting protein 1	Mm.85280	 37493069	chr5	 37493010	+	mm|5qB3	NM_178394	chr5:37493010-37493069	GO:0003723|GO:0005874|GO:0050811|GO:0015031|GO:0008150|GO:0016310|GO:0005737|GO:0016020|GO:0016301|GO:0030529|GO:0006810|GO:0019894|GO:0005856|GO:0000300	NM_178394
A_51_P113890	2.097845	A	2.091064	A	1.00471129444399	NA		Mus musculus adult male corpus striatum cDNA	 RIKEN full-length enriched library	 clone:C030040L07 product:weakly similar to CG12722 PROTEIN [Drosophila melanogaster]	 full insert sequence. [AK081273]		Mm.335154	 51430549	chr9	 51430490	-	mm|9qA5.3	AK081273	chr9:51430549-51430490
A_51_P113906	3.2900631	A	2.7398314	A	1.46432085021457	    66284	Gkn2	Mus musculus gastrokine 2 (Gkn2)	 mRNA [NM_025467]	gastrokine 2	Mm.46446	 87329344	chr6	 87329285	+	mm|6qD1	NM_025467	chr6:87329285-87329344	GO:0008150|GO:0003674|GO:0005794|GO:0005576|GO:0005575	NM_025467
A_51_P113973	2.6378078	A	2.1001766	A	1.45158715935457	   258946	Olfr348	Mus musculus olfactory receptor 348 (Olfr348)	 mRNA [NM_146944]	olfactory receptor 348	Mm.271539	 36642514	chr2	 36642455	+	mm|2qB	NM_146944	chr2:36642455-36642514	GO:0007608|GO:0007165|GO:0004984|GO:0007186|GO:0004930|GO:0004872|GO:0016021|GO:0004871	NM_146944
A_51_P114002	7.8289146	P	7.8895593	P	0.958835546827563	    68312	Gstm7	Mus musculus adult male kidney cDNA	 RIKEN full-length enriched library	 clone:0610005A07 product:GLUTATHIONE S-TRANSFERASE	 MU TYPE 3 (YB3) homolog [Mus musculus]	 full insert sequence. [AK002213]	glutathione S-transferase	 mu 7	Mm.458189	107729697	chr3	107729638	-	mm|3qF2.3	AK002213	chr3:107729697-107729638	GO:0008150|GO:0003674|GO:0005737|GO:0008152|GO:0005575|GO:0004364|GO:0016740
A_51_P114005	6.654061	P	6.7384624	P	0.943175795264828	    68312	Gstm7	Mus musculus glutathione S-transferase	 mu 7 (Gstm7)	 mRNA [NM_026672]	glutathione S-transferase	 mu 7	Mm.458189	107729256	chr3	107729218	-	mm|3qF2.3	NM_026672	chr3:107729256-107729218	GO:0008150|GO:0003674|GO:0005737|GO:0008152|GO:0005575|GO:0004364|GO:0016740	NM_026672
A_51_P114028	10.56538	P	10.722703	P	0.896687380952454	    12055	Bcl7c	Mus musculus B-cell CLL/lymphoma 7C (Bcl7c)	 mRNA [NM_009746]	B-cell CLL/lymphoma 7C	Mm.89667	134850841	chr7	134850782	-	mm|7qF3	NM_009746	chr7:134850841-134850782	GO:0008150|GO:0003674|GO:0006915|GO:0005575	NM_009746
A_51_P114037	3.5855122	A	4.3605137	P	0.584388016679948	    72026	Trmu	Mus musculus adult male aorta and vein cDNA	 RIKEN full-length enriched library	 clone:A530081E16 product:unclassifiable	 full insert sequence. [AK041084]	tRNA 5-methylaminomethyl-2-thiouridylate methyltransferase	Mm.158211	 85711541	chr15	 85711482	+	mm|15qE2	AK041084	chr15:85711482-85711541	GO:0016783|GO:0005739|GO:0008150|GO:0003674|GO:0005737|GO:0000049|GO:0000166|GO:0003723|GO:0005524|GO:0016740|GO:0008033
A_51_P114049	15.062443	P	15.125635	P	0.957144068909882	    68539	Tmem109	Mus musculus transmembrane protein 109 (Tmem109)	 mRNA [NM_134142]	transmembrane protein 109	Mm.251890	 10945277	chr19	 10945218	-	mm|19qA	NM_134142	chr19:10945277-10945218	GO:0008150|GO:0003674|GO:0031965|GO:0005737|GO:0016529|GO:0016020|GO:0005783|GO:0005634|GO:0016021	NM_134142
A_51_P114062	9.411283	P	9.371435	P	1.02800551196366	    14299	Ncs1	Mus musculus neuronal calcium sensor 1 (Ncs1)	 mRNA [NM_019681]	neuronal calcium sensor 1	Mm.249318	 31150689	chr2	 31150630	+	mm|2qB	NM_019681	chr2:31150630-31150689	GO:0030424|GO:0005794|GO:0030054|GO:0051927|GO:0005886|GO:0048015|GO:0005509|GO:0045202|GO:0031045|GO:0031410|GO:0030425|GO:0005829|GO:0043231|GO:0045921|GO:0005737|GO:0016020|GO:0050806|GO:0045211|GO:0010975	NM_019681
A_51_P114067	6.860733	P	7.0377073	P	0.884556192571306	    14299	Ncs1	neuronal calcium sensor 1 [Source:MGI Symbol;Acc:MGI:109166] [ENSMUST00000000199]	neuronal calcium sensor 1	Mm.249318	 31151313	chr2	 31151254	+	mm|2qB	AK042865	chr2:31151254-31151313	GO:0030424|GO:0005794|GO:0030054|GO:0051927|GO:0005886|GO:0048015|GO:0005509|GO:0045202|GO:0031045|GO:0031410|GO:0030425|GO:0005829|GO:0043231|GO:0045921|GO:0005737|GO:0016020|GO:0050806|GO:0045211|GO:0010975
A_51_P114094	9.542316	P	8.380856	P	2.2368367985164	   232370	Clstn3	Mus musculus calsyntenin 3 (Clstn3)	 mRNA [NM_153508]	calsyntenin 3	Mm.193701	124380921	chr6	124380862	-	mm|6qF2	NM_153508	chr6:124380921-124380862	GO:0008150|GO:0003674|GO:0005794|GO:0016020|GO:0005886|GO:0005783|GO:0045211|GO:0005509|GO:0016021|GO:0007155|GO:0007156	NM_153508
A_51_P114126	4.659412	P	3.5389636	A	2.17414536007311	NA		Mus musculus 10 days embryo whole body cDNA	 RIKEN full-length enriched library	 clone:2610315N17 product:unclassifiable	 full insert sequence. [AK012034]			 80381188	chr10	 80381129	+	mm|10qC1	AK012034	chr10:80381129-80381188
A_51_P114136	10.399135	P	10.471769	P	0.95090030630771	    68925	Rpap1	Mus musculus RNA polymerase II associated protein 1 (Rpap1)	 transcript variant 1	 mRNA [NM_177294]	RNA polymerase II associated protein 1	Mm.259223	119589919	chr2	119589860	-	mm|2qE5	NM_177294	chr2:119589919-119589860	GO:0008150|GO:0030880|GO:0003899|GO:0016779|GO:0005634|GO:0003677|GO:0016740|GO:0006351	NM_177294
A_51_P114148	4.694547	P	4.989188	P	0.815275180106881	    15218	Foxn1	Mus musculus forkhead box N1 (Foxn1)	 mRNA [NM_008238]	forkhead box N1	Mm.4496	 78172019	chr11	 78171960	-	mm|11qB5	NM_008238	chr11:78172019-78171960	GO:0005667|GO:0007389|GO:0006355|GO:0003700|GO:0008301|GO:0008283|GO:0003705|GO:0048538|GO:0005634|GO:0007275|GO:0009790|GO:0000122|GO:0003677|GO:0050673|GO:0006351|GO:0043565|GO:0051090|GO:0003690|GO:0030216|GO:0008134	NM_008238
A_51_P114177	11.4051	P	11.204214	P	1.14940401994441	    69123	Eci3	Mus musculus enoyl-Coenzyme A delta isomerase 3 (Eci3)	 mRNA [NM_026947]	enoyl-Coenzyme A delta isomerase 3	Mm.482475	 35039975	chr13	 35038935	-	mm|13qA3.3	NM_026947	chr13:35039975-35038935	GO:0008150|GO:0003674|GO:0005575	NM_026947
A_51_P114214	7.1198235	P	7.740742	P	0.650256806215938	    15932	Idua	Mus musculus iduronidase	 alpha-L- (Idua)	 mRNA [NM_008325]	iduronidase	 alpha-L-	Mm.358608	109112549	chr5	109112490	+	mm|5qF	NM_008325	chr5:109112490-109112549	GO:0048878|GO:0000902|GO:0048705|GO:0035108|GO:0007040	NM_008325
A_51_P114222	3.8853917	P	4.4055195	P	0.697310059778625	    16183	Il2	Mus musculus interleukin 2 (Il2)	 mRNA [NM_008366]	interleukin 2	Mm.14190	 37024653	chr3	 37024495	-	mm|3qB	NM_008366	chr3:37024653-37024495	GO:0005515|GO:0005134|GO:0031851|GO:0030890|GO:0042523|GO:0007204|GO:0005615|GO:0007205|GO:0042104|GO:0006955|GO:0043208|GO:0002903|GO:0045944|GO:0042102|GO:0046013|GO:0045822|GO:0045582|GO:0032740|GO:0005576|GO:0005125|GO:0050672|GO:0007186|GO:0050728|GO:0051024|GO:0001934|GO:0001933|GO:0030246|GO:0048304|GO:0008083|GO:0045591	NM_008366
A_51_P114236	10.417006	P	9.79549	P	1.53849099563653	NA					 11216578	chr16	 11216518	-	mm|16qA1		chr16:011216578-011216518
A_51_P114274	9.551286	P	9.489056	P	1.04407836514856	    71276	Ccdc57	Mus musculus coiled-coil domain containing 57 (Ccdc57)	 mRNA [NM_027745]	coiled-coil domain containing 57	Mm.275751	120688228	chr11	120688169	-	mm|11qE2	NM_027745	chr11:120688228-120688169	GO:0008150|GO:0003674|GO:0005575	NM_027745
A_51_P114287	12.555876	P	11.76716	P	1.72753626924812	   432508	Cpsf6	Mus musculus cleavage and polyadenylation specific factor 6 (Cpsf6)	 mRNA [NM_001013391]	cleavage and polyadenylation specific factor 6	Mm.479892	116781998	chr10	116781939	-	mm|10qD2	NM_001013391	chr10:116781998-116781939	GO:0006397|GO:0006378|GO:0051262|GO:0042382|GO:0000166|GO:0030529|GO:0003723|GO:0005849|GO:0005634|GO:0003729|GO:0003676	NM_001013391
A_51_P114297	10.591339	P	10.870812	P	0.823891920602649	    16582	Kifc3	Mus musculus kinesin family member C3 (Kifc3)	 transcript variant 1	 mRNA [NM_010631]	kinesin family member C3	Mm.378951	 97624011	chr8	 97623952	-	mm|8qD1	NM_010631	chr8:97624011-97623952	GO:0090136|GO:0005813|GO:0005871|GO:0030054|GO:0005794|GO:0005874|GO:0031410|GO:0045218|GO:0003777|GO:0005524|GO:0005915|GO:0005737|GO:0008569|GO:0016020|GO:0000166|GO:0008152|GO:0007030|GO:0005856|GO:0007017|GO:0007018	NM_010631
A_51_P114307	10.557382	P	11.16227	P	0.657522423220355	    19063	Ppt1	Mus musculus palmitoyl-protein thioesterase 1 (Ppt1)	 mRNA [NM_008917]	palmitoyl-protein thioesterase 1	Mm.277719	122535216	chr4	122535157	+	mm|4qD2.2	NM_008917	chr4:122535157-122535216	GO:0044265|GO:0031579|GO:0043005|GO:0030424|GO:0008344|GO:0030308|GO:0006907|GO:0045202|GO:0005634|GO:0015031|GO:0005764|GO:0005615|GO:0030425|GO:0007269|GO:0002084|GO:0043524|GO:0043025|GO:0007625|GO:0044257|GO:0051186|GO:0008306|GO:0043066|GO:0032429|GO:0005794|GO:0008474|GO:0016290|GO:0051181|GO:0048549|GO:0005624|GO:0005576|GO:0006898|GO:0007399|GO:0008021|GO:0016042|GO:0016787|GO:0006309|GO:0007420|GO:0048260|GO:0008152|GO:0045121|GO:0007042|GO:0007040|GO:0007601|GO:0006464	NM_008917
A_51_P114314	11.518063	P	8.559183	P	7.77520115390264	    18218	Dusp8	Mus musculus dual specificity phosphatase 8 (Dusp8)	 mRNA [NM_008748]	dual specificity phosphatase 8	Mm.39725	149265695	chr7	149265636	-	mm|7qF5	NM_008748	chr7:149265695-149265636	GO:0000188|GO:0016791|GO:0005737|GO:0006470|GO:0016787|GO:0016311|GO:0005634|GO:0004721|GO:0008138|GO:0017017|GO:0004725	NM_008748
A_51_P114336	7.7745676	P	7.430998	P	1.26889228022035	   195018	Zzef1	zinc finger	 ZZ-type with EF hand domain 1 [Source:MGI Symbol;Acc:MGI:2444286] [ENSMUST00000152063]	zinc finger	 ZZ-type with EF hand domain 1	Mm.272030	 72731766	chr11	 72731707	+	mm|11qB4	AK018382	chr11:72731707-72731766	GO:0008150|GO:0003674|GO:0005509|GO:0008270|GO:0005575|GO:0046872
A_51_P114348	1.8968617	A	3.4516292	A	0.340383379773824	NA					NA		NA
A_51_P114353	8.863729	P	9.093943	P	0.852508426832828	   233189	Ctu1	Mus musculus cytosolic thiouridylase subunit 1 homolog (S. pombe) (Ctu1)	 mRNA [NM_145582]	cytosolic thiouridylase subunit 1 homolog (S. pombe)	Mm.26514	 50933122	chr7	 50933063	+	mm|7qB4	NM_145582	chr7:50933063-50933122	GO:0005739|GO:0008150|GO:0003674|GO:0005737|GO:0000049|GO:0003723|GO:0016740|GO:0008033	NM_145582
A_51_P114372	8.70064	P	8.698939	P	1.00117973869900	    71711	Mus81	Mus musculus MUS81 endonuclease homolog (yeast) (Mus81)	 mRNA [NM_027877]	MUS81 endonuclease homolog (yeast)	Mm.27697	  5484006	chr19	  5483947	-	mm|19qA	NM_027877	chr19:5484006-5483947	GO:0004518|GO:0006281|GO:0004519|GO:0016787|GO:0048257|GO:0006310|GO:0005634|GO:0006259|GO:0003824|GO:0003677|GO:0046872|GO:0006974	NM_027877
A_51_P114385	12.804907	P	12.810155	P	0.996368971780572	   245688	Rbbp7	Mus musculus retinoblastoma binding protein 7 (Rbbp7)	 mRNA [NM_009031]	retinoblastoma binding protein 7	Mm.270186	159216419	chrX	159216360	+	mm|XqF4	NM_009031	chrX:159216360-159216419	GO:0005515|GO:0006355|GO:0030308|GO:0005634|GO:0000122|GO:0006351|GO:0006260|GO:0035098|GO:0016581|GO:0006338|GO:0045892|GO:0016568|GO:0070370	NM_009031
A_51_P114403	2.6951404	A	2.8908646	A	0.873134492294263	NA					NA		NA
A_51_P114407	9.362356	P	9.009172	P	1.27737666425292	NA					NA		NA
A_51_P114456	8.412977	P	8.274724	P	1.10057159554292	    66526	2210012G02Rik	Mus musculus RIKEN cDNA 2210012G02 gene (2210012G02Rik)	 mRNA [NM_025617]	RIKEN cDNA 2210012G02 gene	Mm.485817	106807163	chr4	106807104	-	mm|4qC7	NM_025617	chr4:106807163-106807104	GO:0008150|GO:0003674|GO:0005634|GO:0005575|GO:0003677|GO:0006351	NM_025617
A_51_P114462	10.145736	P	9.847073	P	1.23000399382048	    20295	Ccl17	Mus musculus chemokine (C-C motif) ligand 17 (Ccl17)	 mRNA [NM_011332]	chemokine (C-C motif) ligand 17	Mm.41988	 97335829	chr8	 97335770	+	mm|8qC5	NM_011332	chr8:97335770-97335829	GO:0008009|GO:0007165|GO:0006968|GO:0006935|GO:0031729|GO:0005576|GO:0005615|GO:0005125	NM_011332
A_51_P114472	9.193994	P	9.512945	P	0.801652556434273	   230904	Fbxo2	Mus musculus F-box protein 2 (Fbxo2)	 mRNA [NM_176848]	F-box protein 2	Mm.262287	147540314	chr4	147540255	+	mm|4qE2	NM_176848	chr4:147540255-147540314	GO:0005515|GO:0005792|GO:0006511|GO:0008285|GO:0016567|GO:0005783|GO:0005529|GO:0031146|GO:0030433|GO:0005829|GO:0030163|GO:0005737|GO:0001540|GO:0001948|GO:0043197|GO:0016020|GO:0030246|GO:0006516|GO:0031396|GO:0019005	NM_176848
A_51_P114504	4.16398	P	4.448287	P	0.821135947562778	NA		Mus musculus	 clone IMAGE:1054919	 mRNA. [BC028807]		Mm.258746	 94425083	chr9	 94425024	+	mm|9qE3.3	BC028807	chr9:94425024-94425083
A_51_P114533	2.8982263	A	2.797628	A	1.07221802984094	   237958	4933407P14Rik	Mus musculus RIKEN cDNA 4933407P14 gene (4933407P14Rik)	 transcript variant 1	 mRNA [NM_199019]	RIKEN cDNA 4933407P14 gene	Mm.117063	104049532	chr11	104049474	+	mm|11qE1	NM_199019	chr11:104049474-104049532	GO:0008150|GO:0003674|GO:0016787|GO:0016020|GO:0008233|GO:0016021|GO:0005575|GO:0004190	NM_199019
A_51_P114551	10.774624	P	10.997822	P	0.856664375389968	    74098	0610037L13Rik	Mus musculus RIKEN cDNA 0610037L13 gene (0610037L13Rik)	 mRNA [NM_028754]	RIKEN cDNA 0610037L13 gene	Mm.274853	107570335	chr4	107570276	+	mm|4qC7	NM_028754	chr4:107570276-107570335	GO:0008150|GO:0003674|GO:0005575	NM_028754
A_51_P114563	12.803478	P	12.85256	P	0.966551158602433	   279766	Rhbdd3	Mus musculus rhomboid domain containing 3 (Rhbdd3)	 mRNA [NM_177370]	rhomboid domain containing 3	Mm.260866	  5006067	chr11	  5006008	+	mm|11qA1	NM_177370	chr11:5006008-5006067	GO:0008150|GO:0003674|GO:0016020|GO:0004252|GO:0016021|GO:0005575	NM_177370
A_51_P114577	10.640212	P	10.879493	P	0.847167412386915	   231440	Parm1	prostate androgen-regulated mucin-like protein 1 [Source:MGI Symbol;Acc:MGI:2443349] [ENSMUST00000040576]	prostate androgen-regulated mucin-like protein 1	Mm.5002	 92054898	chr5	 92054839	+	mm|5qE2	AK161172	chr5:92054839-92054898	GO:0003674|GO:0005794|GO:0016020|GO:0005886|GO:0005770|GO:0016021|GO:0005769|GO:0051973|GO:0005768
A_51_P114591	12.280184	P	11.809891	P	1.38539080150197	    74319	1110005A03Rik	Mus musculus RIKEN cDNA 1110005A03 gene (1110005A03Rik)	 mRNA [NM_028865]	RIKEN cDNA 1110005A03 gene	Mm.429312	116710850	chr11	116710791	+	mm|11qE2	NM_028865	chr11:116710791-116710850	GO:0008150|GO:0003674|GO:0016020|GO:0008168|GO:0016021|GO:0005575|GO:0032259|GO:0016740	NM_028865
A_51_P114606	7.133894	P	7.2353153	P	0.932114247976325	    50884	Nckap1	Mus musculus NCK-associated protein 1 (Nckap1)	 mRNA [NM_016965]	NCK-associated protein 1	Mm.25203	 80360718	chr2	 80360659	-	mm|2qC3	NM_016965	chr2:80360718-80360659	GO:0005886|GO:0001756|GO:0030032|GO:0042995|GO:0048570|GO:0032880|GO:0005737|GO:0042074|GO:0008078|GO:0010172|GO:0048339|GO:0030950|GO:0035050|GO:0007354|GO:0050821|GO:0001843|GO:0045176|GO:0045175|GO:0001701|GO:0030027|GO:0016020|GO:0007492|GO:0048617|GO:0048340|GO:0016021|GO:0030903	NM_016965
A_51_P114616	11.841984	P	12.318948	P	0.718488016694293	    53314	Batf	Mus musculus basic leucine zipper transcription factor	 ATF-like (Batf)	 mRNA [NM_016767]	basic leucine zipper transcription factor	 ATF-like	Mm.6672	 87049929	chr12	 87049872	+	mm|12qD2	NM_016767	chr12:87049872-87049929	GO:0043565|GO:0006355|GO:0003700|GO:0046983|GO:0005634|GO:0003677|GO:0006351	NM_016767
A_51_P114634	9.284469	P	10.657343	P	0.386121287572443	   231842	Amz1	Mus musculus archaelysin family metallopeptidase 1 (Amz1)	 mRNA [NM_173405]	archaelysin family metallopeptidase 1	Mm.397580	141229224	chr5	141229165	+	mm|5qG2	NM_173405	chr5:141229165-141229224	GO:0008150|GO:0003674|GO:0016787|GO:0008233|GO:0005575|GO:0046872|GO:0008237	NM_173405
A_51_P114693	14.529711	P	14.758847	P	0.853145669971085	   231440	Parm1	Mus musculus prostate androgen-regulated mucin-like protein 1 (Parm1)	 mRNA [NM_145562]	prostate androgen-regulated mucin-like protein 1	Mm.5002	 92052997	chr5	 92052938	+	mm|5qE2	NM_145562	chr5:92052938-92052997	GO:0003674|GO:0005794|GO:0016020|GO:0005886|GO:0005770|GO:0016021|GO:0005769|GO:0051973|GO:0005768	NM_145562
A_51_P114714	9.810296	P	10.327788	P	0.698585207893374	    66597	Trim13	Mus musculus tripartite motif-containing 13 (Trim13)	 transcript variant 2	 mRNA [NM_023233]	tripartite motif-containing 13	Mm.23959	 62224600	chr14	 62224541	+	mm|14qD1	NM_023233	chr14:62224541-62224600	GO:0004842|GO:0005783|GO:0016874|GO:0030433|GO:0046872|GO:0051865|GO:0005622|GO:0007165|GO:0005737|GO:0016020|GO:0005789|GO:0043161|GO:0008270|GO:0004871|GO:0016021|GO:0043123	NM_023233
A_51_P114722	2.3149781	A	2.3837237	A	0.953466661575254	    56185	Hao2	Mus musculus hydroxyacid oxidase 2 (Hao2)	 mRNA [NM_019545]	hydroxyacid oxidase 2	Mm.281874	 98678723	chr3	 98678664	-	mm|3qF2.2	NM_019545	chr3:98678723-98678664	GO:0005739|GO:0018924|GO:0010181|GO:0008152|GO:0003973|GO:0016491|GO:0006631|GO:0051260|GO:0003824|GO:0055114|GO:0005777	NM_019545
A_51_P114772	7.5778403	P	7.465753	P	1.08079080060214	   266692	Cpne1	Mus musculus copine I (Cpne1)	 transcript variant 1	 mRNA [NM_170588]	copine I	Mm.27660	155904317	chr2	155904106	-	mm|2qH1	NM_170588	chr2:155904317-155904106	GO:0008150|GO:0001786|GO:0005575	NM_170588
A_51_P114797	2.243352	A	2.228684	A	1.01021894323853	    12405	Cbln2	Mus musculus cerebellin 2 precursor protein (Cbln2)	 mRNA [NM_172633]	cerebellin 2 precursor protein	Mm.70775	 86886079	chr18	 86886020	+	mm|18qE4	NM_172633	chr18:86886020-86886079	GO:0008150|GO:0003674|GO:0016020|GO:0016021|GO:0005575	NM_172633
A_51_P114817	7.8875012	P	9.639375	P	0.296915888151434	    12427	Ccna1	Mus musculus cyclin A1 (Ccna1)	 mRNA [NM_007628]	cyclin A1	Mm.4815	 54852341	chr3	 54851197	-	mm|3qC	NM_007628	chr3:54852341-54851197	GO:0005515|GO:0019901|GO:0005634|GO:0007275|GO:0000079|GO:0007283|GO:0030154|GO:0005737|GO:0007049|GO:0007067|GO:0007126|GO:0015630|GO:0051726|GO:0005856|GO:0051301	NM_007628
A_51_P114826	10.606533	P	11.499058	P	0.538670513428317	    12554	Cdh13	Mus musculus cadherin 13 (Cdh13)	 mRNA [NM_019707]	cadherin 13	Mm.334841	121838028	chr8	121837969	+	mm|8qE1	NM_019707	chr8:121837969-121838028	GO:0005515|GO:0043005|GO:0048471|GO:0008285|GO:0005886|GO:0030032|GO:0002040|GO:0007266|GO:0005615|GO:0001558|GO:0042803|GO:0050927|GO:0050850|GO:0016339|GO:0005737|GO:0030100|GO:0051668|GO:0007155|GO:0007156|GO:0045885|GO:0071813|GO:0045296|GO:0030335|GO:0030169|GO:0048661|GO:0043616|GO:0042058|GO:0007162|GO:0016601|GO:0055096|GO:0001938|GO:0016020|GO:0043542|GO:0005901|GO:0001954|GO:0009897	NM_019707
A_51_P114843	6.8940105	P	7.03794	P	0.905050688802297	   243529	H1fx	Mus musculus H1 histone family	 member X (H1fx)	 mRNA [NM_198622]	H1 histone family	 member X	Mm.33796	 87931096	chr6	 87931037	-	mm|6qD1	NM_198622	chr6:87931096-87931037	GO:0008150|GO:0003674|GO:0005694|GO:0005634|GO:0005575|GO:0003677	NM_198622
A_51_P114854	11.084088	P	10.701693	P	1.30350399095657	    12729	Clns1a	Mus musculus chloride channel	 nucleotide-sensitive	 1A (Clns1a)	 mRNA [NM_023671]	chloride channel	 nucleotide-sensitive	 1A	Mm.21482	104866776	chr7	104865038	+	mm|7qE2	NM_023671	chr7:104865038-104866776	GO:0006821|GO:0000387|GO:0006884|GO:0005829	NM_023671
A_51_P114878	11.5626545	P	11.1169815	P	1.36194930141211	   230233	Ikbkap	Mus musculus inhibitor of kappa light polypeptide enhancer in B-cells	 kinase complex-associated protein (Ikbkap)	 mRNA [NM_026079]	inhibitor of kappa light polypeptide enhancer in B-cells	 kinase complex-associated protein	Mm.282743	 56764081	chr4	 56764022	-	mm|4qB3	NM_026079	chr4:56764081-56764022	GO:0006355|GO:0005737|GO:0004672|GO:0006357|GO:0007252|GO:0016591|GO:0005730|GO:0005634|GO:0008607|GO:0008023|GO:0005524|GO:0006351	NM_026079
A_51_P114900	2.2476554	A	2.3238778	A	0.948538081096485	    77674	Defb12	Mus musculus defensin beta 12 (Defb12)	 mRNA [NM_152802]	defensin beta 12	Mm.281961	 19112271	chr8	 19112212	-	mm|8qA1.3	NM_152802	chr8:19112271-19112212	GO:0050829|GO:0003674|GO:0006952|GO:0005576|GO:0005575|GO:0042742	NM_152802
A_51_P114910	14.310661	P	14.740536	P	0.74232610018368	    13014	Cstb	Mus musculus cystatin B (Cstb)	 mRNA [NM_007793]	cystatin B	Mm.6095	 77890117	chr10	 77890058	+	mm|10qC1	NM_007793	chr10:77890058-77890117	GO:0010951|GO:0005622|GO:0008344|GO:0005737|GO:0004869|GO:0004866|GO:0010466|GO:0005730|GO:0005634|GO:0030414|GO:0002020	NM_007793
A_51_P114917	8.251498	P	8.878615	P	0.647468988715407	    94176	Dock2	Mus musculus dedicator of cyto-kinesis 2 (Dock2)	 mRNA [NM_033374]	dedicator of cyto-kinesis 2	Mm.380679	 34130706	chr11	 34129586	-	mm|11qA4	NM_033374	chr11:34130706-34129586	GO:0001771|GO:0035022|GO:0046633|GO:0046631|GO:0005525|GO:0045059|GO:0005829|GO:0005085|GO:0042608|GO:0042110|GO:0005737|GO:0051020|GO:0042098|GO:0006935|GO:0016020|GO:0007010|GO:0001768|GO:0045060|GO:0001766|GO:0005856|GO:0030675|GO:0030676	NM_033374
A_51_P114941	10.486113	P	9.00327	P	2.79498976488523	    13113	Cyp3a13	Mus musculus cytochrome P450	 family 3	 subfamily a	 polypeptide 13 (Cyp3a13)	 mRNA [NM_007819]	cytochrome P450	 family 3	 subfamily a	 polypeptide 13	Mm.289886	138335377	chr5	138335318	-	mm|5qG2	NM_007819	chr5:138335377-138335318	GO:0005792|GO:0070330|GO:0005506|GO:0005783|GO:0009055|GO:0046872|GO:0004497|GO:0016020|GO:0019825|GO:0005789|GO:0016491|GO:0016712|GO:0016705|GO:0055114|GO:0020037	NM_007819
A_51_P114966	7.5740194	P	7.5523806	P	1.01511192079782	    67690	Prss37	Mus musculus protease	 serine	 37 (Prss37)	 mRNA [NM_026317]	protease	 serine	 37	Mm.52550	 40464912	chr6	 40464853	-	mm|6qB1	NM_026317	chr6:40464912-40464853	GO:0008150|GO:0003674|GO:0004252|GO:0006508|GO:0005576|GO:0005575|GO:0003824|GO:0046872	NM_026317
A_51_P115005	6.760764	P	7.969822	P	0.432550955297379	    13614	Edn1	Mus musculus endothelin 1 (Edn1)	 mRNA [NM_010104]	endothelin 1	Mm.14543	 42403160	chr13	 42403101	+	mm|13qA4	NM_010104	chr13:42403101-42403160	GO:0005515|GO:0019722|GO:0051216|GO:0005615|GO:0007243|GO:0006885|GO:0019229|GO:0046888|GO:0007507|GO:0050880|GO:0001516|GO:0014032|GO:0015758|GO:0046887|GO:0003100|GO:0031583|GO:0030335|GO:0043179|GO:0045840|GO:0000122|GO:0001701|GO:0005125|GO:0014065|GO:0032269|GO:0045793|GO:0001501|GO:0007186|GO:0005179|GO:0035815|GO:0016049|GO:0010460|GO:0030072|GO:0035810|GO:0008284|GO:0042482|GO:0030818|GO:0048514|GO:0007267|GO:0031707|GO:0009953|GO:0031708|GO:0007204|GO:0007205|GO:0042313|GO:0042045|GO:0005737|GO:0045987|GO:0043406|GO:0030185|GO:0042310|GO:0042474|GO:0043507|GO:0010613|GO:0042554|GO:0007589|GO:0014824|GO:0001666|GO:0001569|GO:0014826|GO:0007585|GO:0001821|GO:0048016|GO:0005102|GO:0005576|GO:0048661|GO:0019233|GO:0034392|GO:0008217|GO:0007166	NM_010104
A_51_P115018	8.22799	P	8.339235	P	0.925788790743994	    13821	Epb4.1l1	Mus musculus erythrocyte protein band 4.1-like 1 (Epb4.1l1)	 transcript variant 2	 mRNA [NM_001003815]	erythrocyte protein band 4.1-like 1	Mm.20852	156365912	chr2	156365853	+	mm|2qH1	NM_001003815	chr2:156365853-156365912	GO:0008092|GO:0005515|GO:0005737|GO:0005886|GO:0030866|GO:0005488|GO:0005198|GO:0003779|GO:0005856|GO:0019898|GO:0005829	NM_001003815
A_51_P115027	8.677592	P	8.801041	P	0.917990418029077	    69597	Afg3l2	Mus musculus AFG3(ATPase family gene 3)-like 2 (yeast) (Afg3l2)	 mRNA [NM_027130]	AFG3(ATPase family gene 3)-like 2 (yeast)	Mm.426052	 67565081	chr18	 67565022	-	mm|18qE1	NM_027130	chr18:67565081-67565022	GO:0017111|GO:0042552|GO:0016265|GO:0005743|GO:0021675|GO:0007409|GO:0005524|GO:0046872|GO:0048747|GO:0005739|GO:0030163|GO:0016787|GO:0000166|GO:0016020|GO:0007528|GO:0040014|GO:0006508|GO:0008233|GO:0008270|GO:0016021|GO:0004222|GO:0060013|GO:0008237	NM_027130
A_51_P115049	7.3608704	P	8.351964	P	0.503096270520371	    14012	Mpzl2	Mus musculus myelin protein zero-like 2 (Mpzl2)	 mRNA [NM_007962]	myelin protein zero-like 2	Mm.33240	 44860029	chr9	 44859970	+	mm|9qA5.2	NM_007962	chr9:44859970-44860029		NM_007962
A_51_P115085	11.350684	P	11.469887	P	0.920696137969952	   218210	Nup153	Mus musculus nucleoporin 153 (Nup153)	 mRNA [NM_175749]	nucleoporin 153	Mm.255398	 46775672	chr13	 46775613	-	mm|13qA5	NM_175749	chr13:46775672-46775613	GO:0005515|GO:0043234|GO:0031965|GO:0005737|GO:0008536|GO:0005730|GO:0008270|GO:0005654|GO:0005634	NM_175749
A_51_P115093	9.185041	P	9.178904	P	1.00426290468521	   218210	Nup153	Mus musculus nucleoporin 153 (Nup153)	 mRNA [NM_175749]	nucleoporin 153	Mm.255398	 46776480	chr13	 46776421	-	mm|13qA5	NM_175749	chr13:46776480-46776421	GO:0005515|GO:0043234|GO:0031965|GO:0005737|GO:0008536|GO:0005730|GO:0008270|GO:0005654|GO:0005634	NM_175749
A_51_P115098	7.5589724	P	7.8580294	P	0.81278348877067	    69895	Snhg8	Mus musculus small nucleolar RNA host gene 8 (Snhg8)	 non-coding RNA [NR_028574]	small nucleolar RNA host gene 8	Mm.482410	123210674	chr3	123210615	-	mm|3qG1	NR_028574	chr3:123210674-123210615	GO:0008150|GO:0003674|GO:0005575	NR_028574
A_51_P115139	5.6813135	P	4.9690504	P	1.63837215352958	   258938	Olfr1417	Mus musculus olfactory receptor 1417 (Olfr1417)	 mRNA [NM_146936]	olfactory receptor 1417	Mm.451671	 11902970	chr19	 11902911	-	mm|19qA	NM_146936	chr19:11902970-11902911	GO:0007608|GO:0007165|GO:0004984|GO:0007186|GO:0004930|GO:0004872|GO:0016021|GO:0004871	NM_146936
A_51_P115147	6.53741	P	6.592404	P	0.962598446427822	NA		Mus musculus 0 day neonate eyeball cDNA	 RIKEN full-length enriched library	 clone:E130016M22 product:unclassifiable	 full insert sequence. [AK087419]		Mm.423205	 12328739	chr15	 12328680	-	mm|15qA1	AK087419	chr15:12328739-12328680
A_51_P115159	13.461849	P	13.384668	P	1.05495466299775	    70186	Fam162a	Mus musculus family with sequence similarity 162	 member A (Fam162a)	 mRNA [NM_027342]	family with sequence similarity 162	 member A	Mm.212991	 36044091	chr16	 36044032	-	mm|16qB3	NM_027342	chr16:36044091-36044032	GO:0005739|GO:0008150|GO:0003674|GO:0016020|GO:0016021	NM_027342
A_51_P115178	11.697129	P	12.276763	P	0.669133509592353	   219151	Scara3	Mus musculus scavenger receptor class A	 member 3 (Scara3)	 mRNA [NM_172604]	scavenger receptor class A	 member 3	Mm.344095	 66538548	chr14	 66538489	-	mm|14qD1	NM_172604	chr14:66538548-66538489	GO:0008150|GO:0003674|GO:0005581|GO:0005794|GO:0016020|GO:0005783|GO:0016021|GO:0005575	NM_172604
A_51_P115192	5.2884846	P	5.7033124	P	0.750109022271058	NA					 34528187	chr1	 34528130	+	mm|1qB		chr1:034528130-034528187
A_51_P115197	7.541371	P	8.175681	P	0.644248866989885	    17698	Msn	Mus musculus moesin (Msn)	 mRNA [NM_010833]	moesin	Mm.138876	 93362507	chrX	 93362448	+	mm|XqC3	NM_010833	chrX:93362448-93362507	GO:0008092|GO:0009986|GO:0005886|GO:0031527|GO:0005102|GO:0005730|GO:0045177|GO:0003779|GO:0005625|GO:0005634|GO:0042995|GO:0030175|GO:0016323|GO:0005902|GO:0016324|GO:0005737|GO:0016020|GO:0005488|GO:0009898|GO:0001931|GO:0005856|GO:0050839|GO:0030667|GO:0019898	NM_010833
A_51_P115229	4.000934	P	4.5392594	P	0.688569698716227	   171244	Vmn1r81	Mus musculus vomeronasal 1 receptor 81 (Vmn1r81)	 mRNA [NM_134210]	vomeronasal 1 receptor 81	Mm.377200	 12845322	chr7	 12845263	-	mm|7qA1	NM_134210	chr7:12845322-12845263	GO:0005550|GO:0016503|GO:0007186|GO:0005887|GO:0004872|GO:0019236	NM_134210
A_51_P115244	2.1568103	A	2.1870558	A	0.979253646133087	NA		Mus musculus 0 day neonate cerebellum cDNA	 RIKEN full-length enriched library	 clone:C230070O16 product:unclassifiable	 full insert sequence. [AK048797]			 36489804	chr10	 36489745	+	mm|10qB1	AK048797	chr10:36489745-36489804
A_51_P115268	9.8824005	P	10.093071	P	0.86413552650179	   232339	Ankrd26	Mus musculus ankyrin repeat domain 26 (Ankrd26)	 mRNA [NM_001081112]	ankyrin repeat domain 26	Mm.276116	118489740	chr6	118485139	-	mm|6qF1	NM_001081112	chr6:118489740-118485139	GO:0046621|GO:0003674|GO:0060259|GO:0005813|GO:0040015|GO:0005884|GO:0019217|GO:0019216	NM_001081112
A_51_P115303	2.2899115	A	2.5664911	A	0.825545936788205	NA		Q5SSP0_MOUSE (Q5SSP0) Olfactory receptor MOR135-4	 partial (87%) [TC1617184]			NA		NA
A_51_P115315	2.6131809	A	3.0461378	A	0.74074202808361	    11426	Macf1	microtubule-actin crosslinking factor 1 [Source:MGI Symbol;Acc:MGI:108559] [ENSMUST00000146000]	microtubule-actin crosslinking factor 1	Mm.485351	123216258	chr4	123216199	-	mm|4qD2.2	AK089453	chr4:123216258-123216199	GO:0005515|GO:0008017|GO:0005886|GO:0043001|GO:0006928|GO:0030177|GO:0042995|GO:0015629|GO:0051893|GO:0046872|GO:0005737|GO:0008104|GO:0015630|GO:0007050|GO:0005856|GO:0016055|GO:0005938|GO:0016887|GO:0005794|GO:0001707|GO:0005874|GO:0005509|GO:0032886|GO:0003779|GO:0032587|GO:0007163|GO:0016020|GO:0042060|GO:0006620|GO:0010632
A_51_P115326	14.0177145	P	14.201064	P	0.880656005015853	    20932	Surf4	Mus musculus surfeit gene 4 (Surf4)	 mRNA [NM_011512]	surfeit gene 4	Mm.300594	 26775682	chr2	 26775623	-	mm|2qA3	NM_011512	chr2:26775682-26775623	GO:0005793|GO:0005794|GO:0016020|GO:0005783|GO:0016021	NM_011512
A_51_P115334	11.80325	P	11.910619	P	0.92827939470412	    20932	Surf4	Mus musculus surfeit gene 4 (Surf4)	 mRNA [NM_011512]	surfeit gene 4	Mm.300594	 26776295	chr2	 26776236	-	mm|2qA3	NM_011512	chr2:26776295-26776236	GO:0005793|GO:0005794|GO:0016020|GO:0005783|GO:0016021	NM_011512
A_51_P115335	4.309624	P	4.885582	P	0.670840641791436	NA		tripartite motif-containing 63 [Source:MGI Symbol;Acc:MGI:2447992] [ENSMUST00000134164]		Mm.331961	133873278	chr4	133873219	+	mm|4qD3	AK052911	chr4:133873219-133873278
A_51_P115346	6.2720037	P	6.748415	P	0.718763323943484	    18440	P2rx6	Mus musculus purinergic receptor P2X	 ligand-gated ion channel	 6 (P2rx6)	 transcript variant 1	 mRNA [NM_011028]	purinergic receptor P2X	 ligand-gated ion channel	 6	Mm.8032	 17571352	chr16	 17571293	+	mm|16qA3	NM_011028	chr16:17571293-17571352	GO:0035590|GO:0030054|GO:0004931|GO:0005624|GO:0014069|GO:0051291|GO:0042802|GO:0005737|GO:0034220|GO:0043197|GO:0016020|GO:0005887|GO:0043025|GO:0006810|GO:0001614|GO:0051260|GO:0004872|GO:0016021|GO:0005216|GO:0006812|GO:0006811	NM_011028
A_51_P115359	2.5876188	A	2.3557072	A	1.17439000918803	NA		Mus musculus adult male olfactory brain cDNA	 RIKEN full-length enriched library	 clone:6430596I11 product:unclassifiable	 full insert sequence. [AK032562]			 17886636	chr4	 17886577	+	mm|4qA3	AK032562	chr4:17886577-17886636
A_51_P115374	4.8407736	P	4.9014955	P	0.958784239987479	    72836	Pot1b	Mus musculus protection of telomeres 1B (Pot1b)	 mRNA [NM_028370]	protection of telomeres 1B	Mm.177073	 55792378	chr17	 55792319	-	mm|17qC	NM_028370	chr17:55792378-55792319	GO:0005515|GO:0043247|GO:0051276|GO:0016233|GO:0048239|GO:0007569|GO:0043047|GO:0001558|GO:0031848|GO:0000784|GO:0000783	NM_028370
A_51_P115376	4.5336375	P	3.3278308	A	2.30666213048155	   258060	Olfr1181	Mus musculus olfactory receptor 1181 (Olfr1181)	 mRNA [NM_001011816]	olfactory receptor 1181	Mm.389282	 88264052	chr2	 88263993	-	mm|2qD	NM_001011816	chr2:88264052-88263993	GO:0007608|GO:0007165|GO:0004984|GO:0007186|GO:0004930|GO:0004872|GO:0016021|GO:0004871	NM_001011816
A_51_P115441	12.511261	P	12.332652	P	1.13179212162007	    22240	Dpysl3	Mus musculus dihydropyrimidinase-like 3 (Dpysl3)	 transcript variant 2	 mRNA [NM_009468]	dihydropyrimidinase-like 3	Mm.8180	 43488019	chr18	 43485523	-	mm|18qB3	NM_009468	chr18:43488019-43485523	GO:0051219|GO:0017124|GO:0016810|GO:0016812|GO:0005625|GO:0042995|GO:0005615|GO:0007399|GO:0030426|GO:0035374|GO:0005737|GO:0016787|GO:0010976|GO:0070382|GO:0006208	NM_009468
A_51_P115462	6.974045	P	7.910247	P	0.52260687179674	    73266	Speer6-ps1	Mus musculus spermatogenesis associated glutamate (E)-rich protein 6	 pseudogene 1 (Speer6-ps1)	 non-coding RNA [NR_001581]	spermatogenesis associated glutamate (E)-rich protein 6	 pseudogene 1	Mm.335891	  3188569	chr13	  3188510	+	mm|13qA1	NR_001581	chr13:3188510-3188569		NR_001581
A_51_P115471	7.820924	P	5.7245755	P	4.27625682035219	   239552	Apol8	apolipoprotein L 8 [Source:MGI Symbol;Acc:MGI:2444921] [ENSMUST00000070911]	apolipoprotein L 8	Mm.125650	 77578413	chr15	 77578354	-	mm|15qE1	AK046043	chr15:77578413-77578354	GO:0008150|GO:0003674|GO:0005575
A_51_P115526	8.843817	P	8.958492	P	0.923590347110697	    75172	Ccdc146	Mus musculus coiled-coil domain containing 146 (Ccdc146)	 mRNA [NM_029195]	coiled-coil domain containing 146	Mm.426695	 20836369	chr5	 20828572	-	mm|5qA3	NM_029195	chr5:20836369-20828572	GO:0008150|GO:0003674|GO:0005575	NM_029195
A_51_P115535	4.6530647	P	4.740929	P	0.940914605847592	   258951	Olfr339	Mus musculus olfactory receptor 339 (Olfr339)	 mRNA [NM_146949]	olfactory receptor 339	Mm.377766	 36277394	chr2	 36277335	+	mm|2qB	NM_146949	chr2:36277335-36277394	GO:0007608|GO:0007165|GO:0004984|GO:0007186|GO:0004930|GO:0004872|GO:0016021|GO:0004871	NM_146949
A_51_P115547	13.094219	P	13.455598	P	0.778420171054792	    24044	Scamp2	Mus musculus secretory carrier membrane protein 2 (Scamp2)	 mRNA [NM_022813]	secretory carrier membrane protein 2	Mm.286069	 57435488	chr9	 57435429	+	mm|9qB	NM_022813	chr9:57435429-57435488	GO:0030133|GO:0005794|GO:0016020|GO:0006810|GO:0005634|GO:0016021|GO:0015031|GO:0055038|GO:0032588|GO:0043231|GO:0005768	NM_022813
A_51_P115575	8.049427	P	8.316615	P	0.830937573675365	    26410	Map3k8	Mus musculus cot mRNA for proto-oncogene protein	 complete cds. [D13759]	mitogen-activated protein kinase kinase kinase 8	Mm.3275	  4331613	chr18	  4331553	-	mm|18qA1	D13759	chr18:4331613-4331553	GO:0005515|GO:0000287|GO:0005524|GO:0046872|GO:0005829|GO:0007165|GO:0016310|GO:0005737|GO:0007049|GO:0004672|GO:0000166|GO:0004674|GO:0016301|GO:0004709|GO:0016740|GO:0016772
A_51_P115601	12.499904	P	13.695862	P	0.436496502747362	NA		predicted gene 10881 [Source:MGI Symbol;Acc:MGI:3642817] [ENSMUST00000103364]		Mm.359393	 69676631	chr6	 69676572	-	mm|6qC1	X67198	chr6:69676631-69676572
A_51_P115626	9.486788	P	9.446314	P	1.02845167076358	    58234	Shank3	Mus musculus SH3/ankyrin domain gene 3 (Shank3)	 mRNA [NM_021423]	SH3/ankyrin domain gene 3	Mm.146855	 89390508	chr15	 89390449	+	mm|15qE3	NM_021423	chr15:89390449-89390508	GO:0005515|GO:0017124|GO:0030054|GO:0005886|GO:0001838|GO:0045202|GO:0014069|GO:0044309|GO:0008022|GO:0043621|GO:0051259|GO:0005737|GO:0016020|GO:0035255|GO:0000165|GO:0045211|GO:0008270	NM_021423
A_51_P115635	1.9121548	A	1.9291211	A	0.988308737194177	NA		Mus musculus 3 days neonate thymus cDNA	 RIKEN full-length enriched library	 clone:A630013K22 product:unclassifiable	 full insert sequence. [AK080271]		Mm.461794	  6228590	chr18	  6228531	-	mm|18qA1	AK080271	chr18:6228590-6228531
A_51_P115655	12.926359	P	13.042608	P	0.922583246903662	    75732	Iqcd	Mus musculus IQ motif containing D (Iqcd)	 mRNA [NM_029408]	IQ motif containing D	Mm.425285	121057115	chr5	121057056	+	mm|5qF	NM_029408	chr5:121057056-121057115	GO:0008150|GO:0003674|GO:0005575	NM_029408
A_51_P115656	7.487893	P	7.849295	P	0.778407761279535	    75732	Iqcd	Mus musculus IQ motif containing D (Iqcd)	 mRNA [NM_029408]	IQ motif containing D	Mm.425285	121056654	chr5	121055161	+	mm|5qF	NM_029408	chr5:121055161-121056654	GO:0008150|GO:0003674|GO:0005575	NM_029408
A_51_P115666	12.3703575	P	12.6663	P	0.814540026700347	   105732	Fam83h	Mus musculus family with sequence similarity 83	 member H (Fam83h)	 transcript variant 2	 mRNA [NM_134087]	family with sequence similarity 83	 member H	Mm.267178	 75831616	chr15	 75831557	-	mm|15qD3	NM_134087	chr15:75831616-75831557	GO:0008150|GO:0003674|GO:0005575|GO:0031214	NM_134087
A_51_P115715	7.392288	P	8.55592	P	0.446387334876776	    65256	Asb2	Mus musculus ankyrin repeat and SOCS box-containing 2 (Asb2)	 mRNA [NM_023049]	ankyrin repeat and SOCS box-containing 2	Mm.27159	104559811	chr12	104559752	-	mm|12qE	NM_023049	chr12:104559811-104559752	GO:0035556|GO:0008150|GO:0003674|GO:0005575	NM_023049
A_51_P115738	6.511838	P	6.823347	P	0.8057984860288	   114479	Slc5a5	Mus musculus solute carrier family 5 (sodium iodide symporter)	 member 5 (Slc5a5)	 mRNA [NM_053248]	solute carrier family 5 (sodium iodide symporter)	 member 5	Mm.172923	 73407554	chr8	 73407495	-	mm|8qB3.3	NM_053248	chr8:73407554-73407495	GO:0071436|GO:0006820|GO:0005886|GO:0008507|GO:0005634|GO:0015111|GO:0006814|GO:0055085|GO:0015705|GO:0015293	NM_053248
A_51_P115749	11.524298	P	11.457161	P	1.04763560707278	    76800	Usp42	Mus musculus ubiquitin specific peptidase 42 (Usp42)	 mRNA [NM_029749]	ubiquitin specific peptidase 42	Mm.259620	144475561	chr5	144475502	-	mm|5qG2	NM_029749	chr5:144475561-144475502	GO:0006511|GO:0003674|GO:0016579|GO:0016787|GO:0008233|GO:0008234|GO:0007283|GO:0005575|GO:0004221|GO:0030154	NM_029749
A_51_P115768	9.361194	P	9.259062	P	1.07335848929502	    52187	Rragd	Mus musculus adult male corpus striatum cDNA	 RIKEN full-length enriched library	 clone:C030003H22 product:unclassifiable	 full insert sequence. [AK081204]	Ras-related GTP binding D	Mm.300814	 33110195	chr4	 33110136	+	mm|4qA5	AK081204	chr4:33110136-33110195	GO:0008150|GO:0005737|GO:0046982|GO:0000166|GO:0005634|GO:0005525|GO:0005764
A_51_P115800	4.348177	P	4.125787	P	1.16666470860202	   258862	Olfr770	Mus musculus olfactory receptor 770 (Olfr770)	 mRNA [NM_146863]	olfactory receptor 770	Mm.391449	128570762	chr10	128570703	-	mm|10qD3	NM_146863	chr10:128570762-128570703	GO:0007608|GO:0007165|GO:0004984|GO:0007186|GO:0004930|GO:0004872|GO:0016021|GO:0004871	NM_146863
A_51_P115817	9.312321	P	10.4053755	P	0.468767839475778	    78255	Ralgps2	Mus musculus Ral GEF with PH domain and SH3 binding motif 2 (Ralgps2)	 transcript variant 2	 mRNA [NM_023884]	Ral GEF with PH domain and SH3 binding motif 2	Mm.28376	158739163	chr1	158739104	-	mm|1qH1	NM_023884	chr1:158739163-158739104	GO:0005622|GO:0005085|GO:0008150|GO:0003674|GO:0005737|GO:0016020|GO:0005886|GO:0007264|GO:0005575	NM_023884
A_51_P115829	14.2773905	P	14.025209	P	1.19100667598010	    66411	Tbcb	Mus musculus tubulin folding cofactor B (Tbcb)	 mRNA [NM_025548]	tubulin folding cofactor B	Mm.27947	 31011866	chr7	 31009509	-	mm|7qB1	NM_025548	chr7:31011866-31009509	GO:0005737|GO:0005874|GO:0007275|GO:0005856|GO:0030154|GO:0007399	NM_025548
A_51_P115863	2.0313082	A	1.9986932	A	1.02286446999443	    68191	5330430P22Rik	Mus musculus adult male pituitary gland cDNA	 RIKEN full-length enriched library	 clone:5330430P22 product:RIKEN cDNA 2310066I18 gene	 full insert sequence. [AK019925]	RIKEN cDNA 5330430P22 gene		105926856	chr11	105926797	-	mm|11qE1	AK019925	chr11:105926856-105926797	GO:0008150|GO:0003674|GO:0005575
A_51_P115868	2.3196297	A	2.3171177	A	1.00174270246160	    14285	Fosr	Mouse mRNA induced by PDGF with some homology to c-fos. [K02785]	FBJ osteosarcoma related oncogene	Mm.246513	NA		NA			K02785
A_51_P115886	8.164689	P	8.1333275	P	1.02197612995785	    68277	2310057M21Rik	Mus musculus RIKEN cDNA 2310057M21 gene (2310057M21Rik)	 mRNA [NM_026655]	RIKEN cDNA 2310057M21 gene	Mm.121122	138486310	chr7	138486251	-	mm|7qF3	NM_026655	chr7:138486310-138486251	GO:0008150|GO:0005575|GO:0042802	NM_026655
A_51_P115895	4.1321344	P	4.4961257	P	0.777011954447637	   258541	Olfr800	Mus musculus olfactory receptor 800 (Olfr800)	 mRNA [NM_146548]	olfactory receptor 800	Mm.223078	129096966	chr10	129096907	+	mm|10qD3	NM_146548	chr10:129096907-129096966	GO:0007608|GO:0007165|GO:0004984|GO:0007186|GO:0004930|GO:0004872|GO:0016021|GO:0004871	NM_146548
A_51_P115896	4.498246	P	3.8761687	A	1.53908968280328	   258541	Olfr800	Mus musculus olfactory receptor 800 (Olfr800)	 mRNA [NM_146548]	olfactory receptor 800	Mm.223078	129097028	chr10	129096969	+	mm|10qD3	NM_146548	chr10:129096969-129097028	GO:0007608|GO:0007165|GO:0004984|GO:0007186|GO:0004930|GO:0004872|GO:0016021|GO:0004871	NM_146548
A_51_P115905	2.2252088	A	2.2071328	A	1.01260814931824	   214240	Disp2	dispatched homolog 2 (Drosophila) [Source:MGI Symbol;Acc:MGI:2388733] [ENSMUST00000063975]	dispatched homolog 2 (Drosophila)	Mm.221499	118636900	chr2	118636841	+	mm|2qE5	AK036480	chr2:118636841-118636900	GO:0008150|GO:0003674|GO:0016020|GO:0016021|GO:0005575
A_51_P115934	6.039038	P	5.379958	P	1.57907533350263	   665113	Tnik	TRAF2 and NCK interacting kinase [Source:MGI Symbol;Acc:MGI:1916264] [ENSMUST00000161214]	TRAF2 and NCK interacting kinase	Mm.126193	 28258880	chr3	 28258821	+	mm|3qA3	AK133568	chr3:28258821-28258880	GO:0005515|GO:0048471|GO:0005634|GO:0007243|GO:0005737|GO:0005083|GO:0046777|GO:0000166|GO:0016301|GO:0007010|GO:0005856|GO:0016055|GO:0016772|GO:0031532|GO:0006950|GO:0007256|GO:0005524|GO:0007399|GO:0048814|GO:0016310|GO:0004672|GO:0004674|GO:0006468|GO:0055037|GO:0016740|GO:0005768
A_51_P115940	9.633968	P	10.471935	P	0.559431346724109	   237339	L3mbtl3	Mus musculus l(3)mbt-like 3 (Drosophila) (L3mbtl3)	 mRNA [NM_172787]	l(3)mbt-like 3 (Drosophila)	Mm.338439	 25995451	chr10	 25995392	-	mm|10qA4	NM_172787	chr10:25995451-25995392	GO:0006355|GO:0005634|GO:0006351|GO:0016568	NM_172787
A_51_P115953	12.6663	P	4.758699	P	240.1182086537	   629147	Ctxn3	Mus musculus cortexin 3 (Ctxn3)	 mRNA [NM_001134697]	cortexin 3	Mm.57415	 57637284	chr18	 57637225	+	mm|18qD3	NM_001134697	chr18:57637225-57637284	GO:0008150|GO:0003674|GO:0016020|GO:0031224|GO:0016021|GO:0005575	NM_001134697
A_51_P115988	9.410832	P	9.214152	P	1.14605795374558	    79566	Sh3bp5l	Mus musculus SH3 binding domain protein 5 like (Sh3bp5l)	 transcript variant 2	 mRNA [NM_024480]	SH3 binding domain protein 5 like	Mm.290534	 58160898	chr11	 58160839	+	mm|11qB1.3	NM_024480	chr11:58160839-58160898	GO:0008150|GO:0003674|GO:0005575	NM_024480
A_51_P116007	6.5163455	P	6.3080096	P	1.15535475233639	    15182	Hdac2	Mus musculus histone deacetylase 2 (Hdac2)	 mRNA [NM_008229]	histone deacetylase 2	Mm.19806	 36713589	chr10	 36713455	+	mm|10qB1	NM_008229	chr10:36713455-36713589	GO:0000792|GO:0005515|GO:0000790|GO:0003700|GO:0005657|GO:0032129|GO:0016581|GO:0016580|GO:0017053|GO:0031072|GO:0000785|GO:0000122|GO:0045786|GO:0016358|GO:0033558|GO:0031078|GO:0000118|GO:0010977|GO:0005654|GO:0061198|GO:0019899|GO:0034739|GO:0045892|GO:0042733|GO:0008134|GO:0006344|GO:0008284|GO:0046970|GO:0005634|GO:0010870|GO:0043433|GO:0005737|GO:0061029|GO:0030182|GO:0045944|GO:0042475|GO:0004407|GO:0090090|GO:0046969|GO:0006476|GO:0032041|GO:0005667|GO:0006355|GO:0016575|GO:0043066|GO:0060789|GO:0006351|GO:0045862|GO:0009913|GO:0043565|GO:0021766|GO:0035098|GO:0016787|GO:0048714|GO:0003682|GO:0016568	NM_008229
A_51_P116023	5.1368823	P	5.5569553	P	0.747386805779496	    70771	Gpr173	Mus musculus G-protein coupled receptor 173 (Gpr173)	 mRNA [NM_027543]	G-protein coupled receptor 173	Mm.158445	148781004	chrX	148780945	-	mm|XqF3	NM_027543	chrX:148781004-148780945	GO:0008150|GO:0007165|GO:0003674|GO:0016020|GO:0007186|GO:0005886|GO:0004930|GO:0004872|GO:0016021|GO:0004871	NM_027543
A_51_P116027	12.191501	P	12.247659	P	0.961822112779367	    68975	Med27	Mus musculus mediator complex subunit 27 (Med27)	 mRNA [NM_026896]	mediator complex subunit 27	Mm.330109	 29380252	chr2	 29380193	+	mm|2qB	NM_026896	chr2:29380193-29380252	GO:0005667|GO:0006355|GO:0005737|GO:0006357|GO:0003713|GO:0005730|GO:0005634|GO:0006351	NM_026896
A_51_P116039	6.1415377	P	5.500302	P	1.55966447426569	    15360	Hmgcs2	Mus musculus 3-hydroxy-3-methylglutaryl-Coenzyme A synthase 2 (Hmgcs2)	 nuclear gene encoding mitochondrial protein	 mRNA [NM_008256]	3-hydroxy-3-methylglutaryl-Coenzyme A synthase 2	Mm.289131	 98114021	chr3	 98113963	+	mm|3qF2.2	NM_008256	chr3:98113963-98114021	GO:0005739|GO:0006695|GO:0008610|GO:0006694|GO:0004421|GO:0005759|GO:0008152|GO:0016126|GO:0005743|GO:0008299|GO:0003824|GO:0016740	NM_008256
A_51_P116064	1.912688	A	1.9187311	A	0.995820002882513	    70874	4921513I03Rik	Mus musculus RIKEN cDNA 4921513I03 gene (4921513I03Rik)	 transcript variant 1	 non-coding RNA [NR_038000]	RIKEN cDNA 4921513I03 gene	Mm.427286	120215390	chr10	120215331	+	mm|10qD2	NR_038000	chr10:120215331-120215390	GO:0008150|GO:0003674|GO:0005575	NR_038000
A_51_P116071	2.115834	A	2.096688	A	1.01335944642769	NA		predicted gene 15328 [Source:MGI Symbol;Acc:MGI:3705182] [ENSMUST00000144006]		Mm.136064	 16980154	chr18	 16980095	+	mm|18qA1	AK085921	chr18:16980095-16980154
A_51_P116088	12.655573	P	12.915289	P	0.835252325839524	   104444	Rexo2	Mus musculus REX2	 RNA exonuclease 2 homolog (S. cerevisiae) (Rexo2)	 mRNA [NM_024233]	REX2	 RNA exonuclease 2 homolog (S. cerevisiae)	Mm.21911	 48276972	chr9	 48276913	-	mm|9qA5.3	NM_024233	chr9:48276972-48276913	GO:0005739|GO:0005622|GO:0008408|GO:0006139|GO:0004527|GO:0004518|GO:0016787|GO:0016788|GO:0005634|GO:0003676	NM_024233
A_51_P116130	6.717487	P	6.7036476	P	1.00963889890672	    22213	Ube2g2	Mus musculus ubiquitin-conjugating enzyme E2G 2 (Ube2g2)	 mRNA [NM_019803]	ubiquitin-conjugating enzyme E2G 2	Mm.458125	 77107861	chr10	 77107802	+	mm|10qC1	NM_019803	chr10:77107802-77107861	GO:0005515|GO:0004842|GO:0016881|GO:0000166|GO:0005783|GO:0016874|GO:0008152|GO:0070936|GO:0030433|GO:0005524|GO:0005829	NM_019803
A_51_P116137	13.408543	P	13.826315	P	0.748579787769627	    16206	Lrig1	Mus musculus leucine-rich repeats and immunoglobulin-like domains 1 (Lrig1)	 mRNA [NM_008377]	leucine-rich repeats and immunoglobulin-like domains 1	Mm.245210	 94554740	chr6	 94554681	-	mm|6qD2	NM_008377	chr6:94554740-94554681	GO:0016020|GO:0016021	NM_008377
A_51_P116157	7.6223097	P	7.6850324	P	0.957455472751828	NA					 33964365	chr3	 33964306	+	mm|3qA3		chr3:033964306-033964365
A_51_P116179	1.8800617	A	1.8898917	A	0.99320952340665	   328381	Sh2d4b	SH2 domain containing 4B [Source:MGI Symbol;Acc:MGI:1925182] [ENSMUST00000070328]	SH2 domain containing 4B	Mm.235694	 41627807	chr14	 41627748	-	mm|14qB	AK050671	chr14:41627807-41627748	GO:0008150|GO:0003674|GO:0005575
A_51_P116211	2.7431026	A	2.2003171	A	1.45678250327067	   442824	G630030J09Rik	Mus musculus 0 day neonate cortex cDNA	 RIKEN full-length enriched library	 clone:G630030J09 product:unclassifiable	 full insert sequence. [AK090265]	RIKEN cDNA G630030J09 gene	Mm.474315	 31937409	chr7	 31937350	+	mm|7qB1	AK090265	chr7:31937350-31937409	GO:0008150|GO:0003674|GO:0005575
A_51_P116226	1.9391668	A	1.9555326	A	0.988720191389564	NA					 66478225	chr15	 66478166	-	mm|15qD2		chr15:066478225-066478166
A_51_P116239	4.5823154	P	5.2354364	P	0.635903167422153	    19259	Ptpn5	Mus musculus protein tyrosine phosphatase	 non-receptor type 5 (Ptpn5)	 transcript variant 1	 mRNA [NM_013643]	protein tyrosine phosphatase	 non-receptor type 5	Mm.4654	 54333860	chr7	 54333801	-	mm|7qB4	NM_013643	chr7:54333860-54333801	GO:0016791|GO:0006470|GO:0016787|GO:0016311|GO:0004721|GO:0001784|GO:0004725	NM_013643
A_51_P116245	6.2393847	P	7.102463	P	0.549778235500134	   243659	Styk1	Mus musculus serine/threonine/tyrosine kinase 1 (Styk1)	 mRNA [NM_172891]	serine/threonine/tyrosine kinase 1		131249436	chr6	131249377	-	mm|6qF3	NM_172891	chr6:131249436-131249377	GO:0005886|GO:0005524|GO:0003674|GO:0008150|GO:0016310|GO:0004672|GO:0000166|GO:0016020|GO:0016301|GO:0006468|GO:0004713|GO:0016021|GO:0004715|GO:0016740|GO:0016772	NM_172891
A_51_P116289	5.9030976	P	6.0443115	P	0.906755879547691	    71804	Fam54a	Mus musculus family with sequence similarity 54	 member A (Fam54a)	 mRNA [NM_027930]	family with sequence similarity 54	 member A	Mm.262151	 20080933	chr10	 20080874	+	mm|10qA3	NM_027930	chr10:20080874-20080933	GO:0008150|GO:0003674|GO:0005575	NM_027930
A_51_P116298	10.919149	P	11.326536	P	0.753987755537087	   228993	Slc17a9	Mus musculus solute carrier family 17	 member 9 (Slc17a9)	 mRNA [NM_183161]	solute carrier family 17	 member 9	Mm.87189	180476900	chr2	180476839	+	mm|2qH4	NM_183161	chr2:180476839-180476900	GO:0005215|GO:0016020|GO:0006810|GO:0016021|GO:0006887|GO:0055085	NM_183161
A_51_P116309	11.841317	P	11.641228	P	1.14876922049818	   104263	Kdm3a	Mus musculus lysine (K)-specific demethylase 3A (Kdm3a)	 transcript variant 1	 mRNA [NM_173001]	lysine (K)-specific demethylase 3A	Mm.260479	 71539312	chr6	 71539253	-	mm|6qC1	NM_173001	chr6:71539312-71539253	GO:0006355|GO:0005506|GO:0005634|GO:0050681|GO:0007283|GO:0046872|GO:0006351|GO:0030154|GO:0046293|GO:0005737|GO:0009755|GO:0016491|GO:0045893|GO:0016702|GO:0030521|GO:0055114|GO:0016568|GO:0033169	NM_173001
A_51_P116326	5.475915	P	5.7582474	P	0.822260596298982	   228139	P2rx3	Mus musculus purinergic receptor P2X	 ligand-gated ion channel	 3 (P2rx3)	 mRNA [NM_145526]	purinergic receptor P2X	 ligand-gated ion channel	 3	Mm.440375	 84838957	chr2	 84838898	-	mm|2qD	NM_145526	chr2:84838957-84838898	GO:0043005|GO:0030424|GO:0009408|GO:0009409|GO:0007268|GO:0019228|GO:0009266|GO:0009743|GO:0034220|GO:0050909|GO:0043197|GO:0048167|GO:0043195|GO:0043025|GO:0006810|GO:0033198|GO:0001614|GO:0051260|GO:0004872|GO:0014832|GO:0019717|GO:0006812|GO:0006811|GO:0035590|GO:0005791|GO:0001666|GO:0005794|GO:0010033|GO:0004931|GO:0005624|GO:0007274|GO:0030432|GO:0005524|GO:0016020|GO:0005887|GO:0045121|GO:0044424|GO:0016021|GO:0048266|GO:0005216|GO:0050896	NM_145526
A_51_P116343	3.0537643	A	3.5597916	A	0.704158788590932	100503384	LOC100503384	PREDICTED: Mus musculus hypothetical protein LOC100503384 (LOC100503384)	 mRNA [XM_003084638]	hypothetical protein LOC100503384	Mm.441691	 99049933	chr6	 99049874	-	mm|6qD3	XM_003084638	chr6:99049933-99049874		XM_003084638
A_51_P116377	4.090243	P	2.867051	A	2.33462688505134	100503685	LOC100503685	PREDICTED: Mus musculus hypothetical LOC100503685 (LOC100503685)	 partial miscRNA [XR_105074]	hypothetical LOC100503685	Mm.441919	 28034786	chr7	 28034727	-	mm|7qA3	XR_105074	chr7:28034786-28034727		XR_105074
A_51_P116395	11.207338	P	11.192177	P	1.01056421582196	   216820	Dhrs7b	Mus musculus dehydrogenase/reductase (SDR family) member 7B (Dhrs7b)	 transcript variant 2	 mRNA [NM_145428]	dehydrogenase/reductase (SDR family) member 7B	Mm.21475	 60671642	chr11	 60671583	+	mm|11qB2	NM_145428	chr11:60671583-60671642	GO:0008150|GO:0003674|GO:0016020|GO:0005488|GO:0008152|GO:0016491|GO:0016021|GO:0005575|GO:0055114|GO:0005777	NM_145428
A_51_P116407	9.265181	P	9.495907	P	0.85220593264031	    27355	X99384	Mus musculus cDNA sequence X99384 (X99384)	 mRNA [NM_013753]	cDNA sequence X99384	Mm.269699	 60782819	chr10	 60782760	-	mm|10qB4	NM_013753	chr10:60782819-60782760	GO:0008150|GO:0003674|GO:0005575	NM_013753
A_51_P116419	8.544643	P	7.9243083	P	1.53723177210018	    27416	Abcc5	Mus musculus ATP-binding cassette	 sub-family C (CFTR/MRP)	 member 5 (Abcc5)	 transcript variant 1	 mRNA [NM_013790]	ATP-binding cassette	 sub-family C (CFTR/MRP)	 member 5	Mm.20845	 20332471	chr16	 20332412	-	mm|16qA3	NM_013790	chr16:20332471-20332412	GO:0048471|GO:0017111|GO:0016020|GO:0000166|GO:0006810|GO:0042626|GO:0005624|GO:0016021|GO:0055085|GO:0016887|GO:0005524	NM_013790
A_51_P116421	12.20381	P	11.444878	P	1.69223742938780	    27416	Abcc5	Mus musculus ATP-binding cassette	 sub-family C (CFTR/MRP)	 member 5 (Abcc5)	 transcript variant 1	 mRNA [NM_013790]	ATP-binding cassette	 sub-family C (CFTR/MRP)	 member 5	Mm.20845	 20331627	chr16	 20331568	-	mm|16qA3	NM_013790	chr16:20331627-20331568	GO:0048471|GO:0017111|GO:0016020|GO:0000166|GO:0006810|GO:0042626|GO:0005624|GO:0016021|GO:0055085|GO:0016887|GO:0005524	NM_013790
A_51_P116431	3.5760183	A	4.045585	A	0.72218146566016	   230801	Pigv	phosphatidylinositol glycan anchor biosynthesis	 class V [Source:MGI Symbol;Acc:MGI:2442480] [ENSMUST00000062118]	phosphatidylinositol glycan anchor biosynthesis	 class V	Mm.217004	133217198	chr4	133217139	-	mm|4qD3	AK052446	chr4:133217198-133217139	GO:0000030|GO:0016758|GO:0016020|GO:0016757|GO:0005783|GO:0016254|GO:0005789|GO:0016021|GO:0016740|GO:0006506
A_51_P116447	8.85247	P	9.147625	P	0.81498476751778	    74204	Xpo6	Mus musculus exportin 6 (Xpo6)	 mRNA [NM_028816]	exportin 6	Mm.235663	133248390	chr7	133248331	-	mm|7qF3	NM_028816	chr7:133248390-133248331	GO:0005737|GO:0005488|GO:0008565|GO:0006611|GO:0006810|GO:0005634|GO:0005575|GO:0015031|GO:0006886	NM_028816
A_51_P116465	2.4247236	A	3.3793812	A	0.515964030718522	    74291	1700092E16Rik	Mus musculus adult male testis cDNA	 RIKEN full-length enriched library	 clone:1700092E16 product:unclassifiable	 full insert sequence. [AK007040]	RIKEN cDNA 1700092E16 gene	Mm.159161	 83962225	chr10	 83962166	+	mm|10qC1	AK007040	chr10:83962166-83962225	GO:0008150|GO:0003674|GO:0005575
A_51_P116479	7.8420286	P	7.8246393	P	1.01212627856040	   217707	Coq6	Mus musculus coenzyme Q6 homolog (yeast) (Coq6)	 nuclear gene encoding mitochondrial protein	 mRNA [NM_172582]	coenzyme Q6 homolog (yeast)	Mm.280062	 85711295	chr12	 85711236	+	mm|12qD1	NM_172582	chr12:85711236-85711295	GO:0005739|GO:0008150|GO:0003674	NM_172582
A_51_P116487	14.210711	P	14.117275	P	1.06690816474757	    50783	Lsm4	Mus musculus LSM4 homolog	 U6 small nuclear RNA associated (S. cerevisiae) (Lsm4)	 mRNA [NM_015816]	LSM4 homolog	 U6 small nuclear RNA associated (S. cerevisiae)	Mm.248188	 73202594	chr8	 73202536	+	mm|8qB3.3	NM_015816	chr8:73202536-73202594	GO:0008380|GO:0006397|GO:0008150|GO:0003674|GO:0005737|GO:0030529|GO:0003723|GO:0005681|GO:0005654|GO:0005634	NM_015816
A_51_P116496	4.6900687	P	6.798724	M	0.231863028522257	   271278	BC024139	Mus musculus cDNA sequence BC024139 (BC024139)	 mRNA [NM_001142968]	cDNA sequence BC024139	Mm.205253	 75951060	chr15	 75951001	-	mm|15qD3	NM_001142968	chr15:75951060-75951001	GO:0008150|GO:0003674|GO:0005575	NM_001142968
A_51_P116581	12.078165	P	11.934858	P	1.10443384146668	    54638	Ccdc22	Mus musculus coiled-coil domain containing 22 (Ccdc22)	 mRNA [NM_138603]	coiled-coil domain containing 22	Mm.288192	  7171047	chrX	  7170988	-	mm|XqA1.1	NM_138603	chrX:7171047-7170988	GO:0008150|GO:0003674|GO:0005575	NM_138603
A_51_P116601	12.9254465	P	12.484734	P	1.35727447552229	   207686	A330021E22Rik	Mus musculus RIKEN cDNA A330021E22 gene (A330021E22Rik)	 mRNA [NM_172447]	RIKEN cDNA A330021E22 gene	Mm.319007	  5581249	chr5	  5581190	-	mm|5qA1	NM_172447	chr5:5581249-5581190	GO:0008150|GO:0003674|GO:0005488|GO:0005575	NM_172447
A_51_P116609	3.5991096	A	3.8202372	A	0.857894650082989	    66654	Tex12	Mus musculus testis expressed gene 12 (Tex12)	 mRNA [NM_025687]	testis expressed gene 12	Mm.442255	 50365486	chr9	 50365427	-	mm|9qA5.3	NM_025687	chr9:50365486-50365427	GO:0005515|GO:0000795	NM_025687
A_51_P116616	12.665656	P	12.632826	P	1.02301691541241	    56275	Rbm14	Mus musculus RNA binding motif protein 14 (Rbm14)	 mRNA [NM_019869]	RNA binding motif protein 14	Mm.276338	  4801020	chr19	  4800961	-	mm|19qA	NM_019869	chr19:4801020-4800961	GO:0005667|GO:0016575|GO:0030374|GO:0045944|GO:0005634	NM_019869
A_51_P116636	5.1375775	P	5.339377	P	0.869465386523833	    66765	4933411K16Rik	Mus musculus RIKEN cDNA 4933411K16 gene (4933411K16Rik)	 mRNA [NM_025752]	RIKEN cDNA 4933411K16 gene	Mm.440412	 42128093	chr19	 42128034	+	mm|19qC3	NM_025752	chr19:42128034-42128093	GO:0008150|GO:0003674|GO:0005575	NM_025752
A_51_P116651	5.7472644	P	5.930549	P	0.880695622439274	    56429	Dpt	Mus musculus dermatopontin (Dpt)	 mRNA [NM_019759]	dermatopontin	Mm.28935	166753762	chr1	166753703	+	mm|1qH2.2	NM_019759	chr1:166753703-166753762	GO:0003674|GO:0008285|GO:0030199|GO:0005578|GO:0005576|GO:0007155|GO:0005615	NM_019759
A_51_P116665	13.047074	P	13.111411	P	0.95638472951483	NA		predicted gene 6483 [Source:MGI Symbol;Acc:MGI:3644574] [ENSMUST00000136929]		Mm.483074	 19688197	chr8	 19688138	+	mm|8qA1.3	XM_003086685	chr8:19688138-19688197		XM_003086685
A_51_P116687	9.350286	P	9.355498	P	0.996393834783146	    66931	1700010I14Rik	Mus musculus RIKEN cDNA 1700010I14 gene (1700010I14Rik)	 mRNA [NM_025851]	RIKEN cDNA 1700010I14 gene	Mm.67591	  9201027	chr17	  9200968	+	mm|17qA1	NM_025851	chr17:9200968-9201027	GO:0008150|GO:0003674|GO:0005575	NM_025851
A_51_P116699	9.753215	P	10.319782	P	0.675221618259642	    67009	Ttc23	Mus musculus tetratricopeptide repeat domain 23 (Ttc23)	 transcript variant 1	 mRNA [NM_025905]	tetratricopeptide repeat domain 23	Mm.249356	 74871208	chr7	 74871149	+	mm|7qC	NM_025905	chr7:74871149-74871208	GO:0008150|GO:0003674|GO:0005488|GO:0005575	NM_025905
A_51_P116725	6.3740854	P	3.782497	A	6.02761971673376	   258804	Olfr1240	Mus musculus olfactory receptor 1240 (Olfr1240)	 mRNA [NM_146808]	olfactory receptor 1240	Mm.223231	 89279996	chr2	 89279937	-	mm|2qE1	NM_146808	chr2:89279996-89279937	GO:0007608|GO:0007165|GO:0004984|GO:0007186|GO:0004930|GO:0004872|GO:0016021|GO:0004871	NM_146808
A_51_P116755	8.374133	P	8.80939	P	0.739561998183629	    67252	Cap2	Mus musculus CAP	 adenylate cyclase-associated protein	 2 (yeast) (Cap2)	 mRNA [NM_026056]	CAP	 adenylate cyclase-associated protein	 2 (yeast)	Mm.44529	 46744247	chr13	 46744188	+	mm|13qA5	NM_026056	chr13:46744188-46744247	GO:0000902|GO:0016020|GO:0005886|GO:0005488|GO:0007010|GO:0003779	NM_026056
A_51_P116796	3.2497687	A	3.3657913	A	0.922728037889345	    12966	Crygc	Mus musculus crystallin	 gamma C (Crygc)	 transcript variant 1	 mRNA [NM_007775]	crystallin	 gamma C	Mm.485021	 65119746	chr1	 65118397	-	mm|1qC2	NM_007775	chr1:65119746-65118397	GO:0005737|GO:0005212|GO:0001654|GO:0043010|GO:0005634|GO:0007601	NM_007775
A_51_P116813	9.84544	P	9.860691	P	0.989484490984307	    13074	Cyp17a1	Mus musculus cytochrome P450	 family 17	 subfamily a	 polypeptide 1 (Cyp17a1)	 mRNA [NM_007809]	cytochrome P450	 family 17	 subfamily a	 polypeptide 1	Mm.1262	 46743207	chr19	 46742594	-	mm|19qC3	NM_007809	chr19:46743207-46742594	GO:0030424|GO:0005792|GO:0006694|GO:0005506|GO:0005783|GO:0006704|GO:0009055|GO:0004508|GO:0042995|GO:0046872|GO:0016829|GO:0005739|GO:0004497|GO:0016020|GO:0043025|GO:0005789|GO:0016491|GO:0090031|GO:0016705|GO:0008202|GO:0055114|GO:0020037	NM_007809
A_51_P116838	1.9595059	A	3.207807	A	0.420943613918528	    13190	Dct	Mus musculus dopachrome tautomerase (Dct)	 mRNA [NM_010024]	dopachrome tautomerase	Mm.19987	118412105	chr14	118412048	-	mm|14qE4	NM_010024	chr14:118412105-118412048	GO:0021847|GO:0004167|GO:0042438|GO:0043473|GO:0002052|GO:0048468|GO:0046872|GO:0048066	NM_010024
A_51_P116889	5.214031	P	3.4818153	A	3.32237679392195	   258448	Olfr92	Mus musculus olfactory receptor 92 (Olfr92)	 mRNA [NM_146456]	olfactory receptor 92	Mm.377508	 37248402	chr17	 37248343	-	mm|17qB1	NM_146456	chr17:37248402-37248343	GO:0007608|GO:0007165|GO:0004984|GO:0007186|GO:0004930|GO:0004872|GO:0016021|GO:0004871	NM_146456
A_51_P116896	4.112711	P	2.2463017	A	3.64623943269446	   258764	Olfr1099	Mus musculus olfactory receptor 1099 (Olfr1099)	 mRNA [NM_146768]	olfactory receptor 1099	Mm.377680	 86799342	chr2	 86799283	-	mm|2qD	NM_146768	chr2:86799342-86799283	GO:0007608|GO:0007165|GO:0004984|GO:0007186|GO:0004930|GO:0004872|GO:0016021|GO:0004871	NM_146768
A_51_P116906	11.365038	P	12.398122	P	0.488664430201831	   223864	Rapgef3	Mus musculus Rap guanine nucleotide exchange factor (GEF) 3 (Rapgef3)	 transcript variant 2	 mRNA [NM_144850]	Rap guanine nucleotide exchange factor (GEF) 3	Mm.24028	 97575483	chr15	 97575424	-	mm|15qF1	NM_144850	chr15:97575483-97575424	GO:0051056|GO:0005952|GO:0005886|GO:0008603|GO:0007264|GO:0005085|GO:0005622|GO:0035556|GO:0005737|GO:0050790|GO:0030552|GO:0000166|GO:0016020|GO:0001932	NM_144850
A_51_P116932	8.695372	P	9.379273	P	0.622479831769410	    16763	Lad1	Mus musculus ladinin (Lad1)	 mRNA [NM_133664]	ladinin	Mm.36726	137728169	chr1	137728110	+	mm|1qE4	NM_133664	chr1:137728110-137728169	GO:0005578|GO:0005576|GO:0005604	NM_133664
A_51_P116940	10.250972	P	10.451027	P	0.870517375846966	    13850	Ephx2	Mus musculus epoxide hydrolase 2	 cytoplasmic (Ephx2)	 mRNA [NM_007940]	epoxide hydrolase 2	 cytoplasmic	Mm.15295	 66703378	chr14	 66703319	-	mm|14qD1	NM_007940	chr14:66703378-66703319	GO:0019439|GO:0000287|GO:0005794|GO:0003869|GO:0005730|GO:0009636|GO:0045777|GO:0003824|GO:0046872|GO:0019233|GO:0043651|GO:0002539|GO:0005829|GO:0005737|GO:0006954|GO:0016787|GO:0008152|GO:0005925|GO:0004301|GO:0005777	NM_007940
A_51_P116946	10.184883	P	9.079751	P	2.15118559555721	   140494	Atp6v0a4	Mus musculus ATPase	 H+ transporting	 lysosomal V0 subunit A4 (Atp6v0a4)	 mRNA [NM_080467]	ATPase	 H+ transporting	 lysosomal V0 subunit A4	Mm.462308	 37998815	chr6	 37998756	-	mm|6qB1	NM_080467	chr6:37998815-37998756	GO:0007588|GO:0033177|GO:0005886|GO:0006200|GO:0007605|GO:0015078|GO:0045177|GO:0031526|GO:0006885|GO:0005903|GO:0033572|GO:0016324|GO:0016020|GO:0001503|GO:0008553|GO:0015991|GO:0006810|GO:0051117|GO:0016021|GO:0016471|GO:0010008|GO:0015992|GO:0005768|GO:0006811	NM_080467
A_51_P116976	5.062892	P	4.5386667	P	1.4381611072645	NA		Mus musculus 16 days embryo head cDNA	 RIKEN full-length enriched library	 clone:C130020O07 product:unclassifiable	 full insert sequence. [AK047905]		Mm.447565	 67197787	chr17	 67197728	-	mm|17qE1.1	AK047905	chr17:67197787-67197728
A_51_P116986	6.706144	P	6.775738	P	0.952906125017044	   228812	Pigu	Mus musculus phosphatidylinositol glycan anchor biosynthesis	 class U (Pigu)	 mRNA [NM_001004721]	phosphatidylinositol glycan anchor biosynthesis	 class U	Mm.5434	155154348	chr2	155140308	-	mm|2qH1	NM_001004721	chr2:155154348-155140308	GO:0003674|GO:0016020|GO:0005886|GO:0005783|GO:0016255|GO:0005789|GO:0046425|GO:0042765|GO:0016021|GO:0006506	NM_001004721
A_51_P117015	5.666351	P	3.3359263	A	5.0295338723883	   257734	Olfr1355	Mus musculus clone OR27-3 putative olfactory receptor mRNA	 partial cds. [AF042360]	olfactory receptor 1355	Mm.334149	 78342324	chr10	 78342265	+	mm|10qC1	AF042360	chr10:78342265-78342324	GO:0007608|GO:0007165|GO:0004984|GO:0007186|GO:0004930|GO:0004872|GO:0016021|GO:0004871
A_51_P117020	6.5347185	P	3.745964	A	6.91032948473478	   257734	Olfr1355	Mus musculus olfactory receptor 1355 (Olfr1355)	 mRNA [NM_207571]	olfactory receptor 1355	Mm.334149	 78342595	chr10	 78342536	+	mm|10qC1	NM_207571	chr10:78342536-78342595	GO:0007608|GO:0007165|GO:0004984|GO:0007186|GO:0004930|GO:0004872|GO:0016021|GO:0004871	NM_207571
A_51_P117087	3.4875941	A	3.6710541	A	0.880588555721876	    70357	Kcnip1	Mus musculus Kv channel-interacting protein 1 (Kcnip1)	 transcript variant B	 mRNA [NM_027398]	Kv channel-interacting protein 1	Mm.252514	 33530570	chr11	 33530511	-	mm|11qA4	NM_027398	chr11:33530570-33530511	GO:0005244|GO:0046982|GO:0005886|GO:0005509|GO:0005267|GO:0015459|GO:0030425|GO:0047485|GO:0016020|GO:0006810|GO:0043025|GO:0045760|GO:0034765|GO:0005216|GO:0006813|GO:0071805|GO:0006811	NM_027398
A_51_P117109	10.48852	P	10.705807	P	0.860181494897239	   216136	Ilvbl	Mus musculus ilvB (bacterial acetolactate synthase)-like (Ilvbl)	 mRNA [NM_173751]	ilvB (bacterial acetolactate synthase)-like	Mm.2644	 78046862	chr10	 78046717	+	mm|10qC1	NM_173751	chr10:78046717-78046862	GO:0008150|GO:0003674|GO:0000287|GO:0016020|GO:0016021|GO:0005575|GO:0030976|GO:0003824|GO:0046872|GO:0016740	NM_173751
A_51_P117115	10.035107	P	4.47001	P	47.3435833478725	   258962	Olfr53	Mus musculus olfactory receptor 53 (Olfr53)	 mRNA [NM_146960]	olfactory receptor 53	Mm.246542	147838717	chr7	147838658	+	mm|7qF5	NM_146960	chr7:147838658-147838717	GO:0007608|GO:0007165|GO:0004984|GO:0007186|GO:0004930|GO:0004872|GO:0016021|GO:0004871	NM_146960
A_51_P117130	9.588219	P	9.9614935	P	0.772028226154137	    17939	Naga	Mus musculus N-acetyl galactosaminidase	 alpha (Naga)	 mRNA [NM_008669]	N-acetyl galactosaminidase	 alpha	Mm.20325	 82160595	chr15	 82160536	-	mm|15qE1	NM_008669	chr15:82160595-82160536	GO:0009311|GO:0046477|GO:0043169|GO:0005975|GO:0019377|GO:0016139|GO:0003824|GO:0005764|GO:0008456|GO:0042803|GO:0004553|GO:0005737|GO:0016052|GO:0016787|GO:0016798|GO:0008152|GO:0004557	NM_008669
A_51_P117162	11.508394	P	11.772382	P	0.832782697743488	    12417	Cbx3	Mus musculus chromobox homolog 3 (Drosophila HP1 gamma) (Cbx3)	 mRNA [NM_007624]	chromobox homolog 3 (Drosophila HP1 gamma)	Mm.393602	 51428464	chr6	 51425341	+	mm|6qB3	NM_007624	chr6:51425341-51428464	GO:0005720|GO:0010369|GO:0005719|GO:0019904|GO:0005819|GO:0005634|GO:0019899|GO:0045892|GO:0000785	NM_007624
A_51_P117165	8.386749	P	6.323955	P	4.17794644691302	    70730	6330409D20Rik	RIKEN cDNA 6330409D20 gene [Source:MGI Symbol;Acc:MGI:1917980] [ENSMUST00000009695]	RIKEN cDNA 6330409D20 gene	Mm.401360	 32588178	chr2	 32588140	-	mm|2qB	XM_003084495	chr2:32588178-32588140	GO:0008150|GO:0003674|GO:0005575	XM_003084495
A_51_P117195	5.1761374	P	4.3182974	P	1.81232287235056	100043911	Ppp4r1l-ps	Mus musculus protein phosphatase 4	 regulatory subunit 1-like	 pseudogene (Ppp4r1l-ps)	 non-coding RNA [NR_027957]	protein phosphatase 4	 regulatory subunit 1-like	 pseudogene	Mm.260590	173406619	chr2	173406560	-	mm|2qH4	NR_027957	chr2:173406619-173406560		NR_027957
A_51_P117206	2.9934163	A	3.51239	A	0.697868103920742	    18354	Olfr54	Mus musculus olfactory receptor 54 (Olfr54)	 mRNA [NM_010997]	olfactory receptor 54	Mm.222843	 50840852	chr11	 50840793	+	mm|11qB1.3	NM_010997	chr11:50840793-50840852	GO:0007608|GO:0007165|GO:0004984|GO:0007186|GO:0004930|GO:0004872|GO:0016021|GO:0004871	NM_010997
A_51_P117226	10.048665	P	9.495224	P	1.46758188296742	    70546	Zdhhc2	zinc finger	 DHHC domain containing 2 [Source:MGI Symbol;Acc:MGI:1923452] [ENSMUST00000049389]	zinc finger	 DHHC domain containing 2	Mm.34326	 41570824	chr8	 41570765	+	mm|8qA4	AK046533	chr8:41570765-41570824	GO:0018345|GO:0016020|GO:0016409|GO:0008270|GO:0016021|GO:0005575|GO:0046872|GO:0016740|GO:0008415
A_51_P117236	8.288288	P	8.59008	P	0.811244107951822	    21408	Zfp354a	Mus musculus zinc finger protein 354A (Zfp354a)	 mRNA [NM_009329]	zinc finger protein 354A	Mm.4792	 50884648	chr11	 50884589	+	mm|11qB1.3	NM_009329	chr11:50884589-50884648	GO:0003700|GO:0007576|GO:0005730|GO:0005634|GO:0000122|GO:0046872|GO:0006351	NM_009329
A_51_P117369	7.6464787	P	7.2432	P	1.32251006311875	   320595	Phf8	Mus musculus PHD finger protein 8 (Phf8)	 transcript variant 1	 mRNA [NM_177201]	PHD finger protein 8	Mm.17156	148059952	chrX	148059893	+	mm|XqF3	NM_177201	chrX:148059893-148059952	GO:0032454|GO:0035574|GO:0032452|GO:0035575|GO:0005506|GO:0005730|GO:0005634|GO:0035064|GO:0051864|GO:0070544|GO:0000082|GO:0045943|GO:0003682|GO:0071557|GO:0016706|GO:0061188|GO:0008270|GO:0045893|GO:0071558|GO:0055114|GO:0033169	NM_177201
A_51_P117378	2.5915802	A	4.443967	P	0.276933828468928	    73388	1700058C13Rik	Mus musculus RIKEN cDNA 1700058C13 gene (1700058C13Rik)	 mRNA [NM_028528]	RIKEN cDNA 1700058C13 gene	Mm.71904	153963319	chr2	153962882	+	mm|2qH1	NM_028528	chr2:153962882-153963319	GO:0008150|GO:0003674|GO:0005576|GO:0005575|GO:0008289	NM_028528
A_51_P117385	9.138258	P	7.3364115	P	3.48666196423088	   208890	Slc26a7	solute carrier family 26	 member 7 [Source:MGI Symbol;Acc:MGI:2384791] [ENSMUST00000042221]	solute carrier family 26	 member 7	Mm.483839	 14430398	chr4	 14430339	-	mm|4qA1	AK054327	chr4:14430398-14430339	GO:0006820|GO:0005215|GO:0006821|GO:0019531|GO:0005886|GO:0019532|GO:0055085|GO:0001696|GO:0005254|GO:0005253|GO:0016323|GO:0005737|GO:0034220|GO:0016020|GO:0015116|GO:0015301|GO:0015106|GO:0006810|GO:0008272|GO:0015701|GO:0016021|GO:0005768|GO:0006811
A_51_P117411	3.2843246	A	3.9315479	P	0.638508043823762	    59050	Nsa2	Mus musculus 8 days embryo whole body cDNA	 RIKEN full-length enriched library	 clone:5730530B02 product:unclassifiable	 full insert sequence. [AK077696]	NSA2 ribosome biogenesis homolog (S. cerevisiae)		 97903125	chr13	 97903066	+	mm|13qD1	AK077696	chr13:097903066-097903125	GO:0008150|GO:0003674|GO:0005575
A_51_P117432	10.594346	P	10.6770525	P	0.94428450362036	   140630	Ube4a	Mus musculus ubiquitination factor E4A	 UFD2 homolog (S. cerevisiae) (Ube4a)	 mRNA [NM_145400]	ubiquitination factor E4A	 UFD2 homolog (S. cerevisiae)	Mm.215069	 44731746	chr9	 44731687	-	mm|9qA5.2	NM_145400	chr9:44731746-44731687	GO:0000209|GO:0005737|GO:0004842|GO:0034450	NM_145400
A_51_P117439	11.697466	P	11.615104	P	1.05875002234084	    23950	Dnajb6	Mus musculus DnaJ (Hsp40) homolog	 subfamily B	 member 6 (Dnajb6)	 transcript variant 3	 mRNA [NM_011847]	DnaJ (Hsp40) homolog	 subfamily B	 member 6	Mm.290110	 30093026	chr5	 30092967	+	mm|5qB1	NM_011847	chr5:30092967-30093026	GO:0005515|GO:0048471|GO:0060710|GO:0045109|GO:0051087|GO:0005634|GO:0032781|GO:0003677|GO:0005737|GO:0006457|GO:0031072|GO:0051082|GO:0043154|GO:0045892|GO:0001671	NM_011847
A_51_P117457	8.070262	P	8.440847	P	0.773468798460168	   245403	Dcaf12l2	Mus musculus DDB1 and CUL4 associated factor 12-like 2 (Dcaf12l2)	 mRNA [NM_175539]	DDB1 and CUL4 associated factor 12-like 2	Mm.55270	 41719696	chrX	 41719637	-	mm|XqA4	NM_175539	chrX:41719696-41719637	GO:0008150|GO:0003674|GO:0005575	NM_175539
A_51_P117477	11.324792	P	14.131538	P	0.142917451670369	    26457	Slc27a1	Mus musculus solute carrier family 27 (fatty acid transporter)	 member 1 (Slc27a1)	 mRNA [NM_011977]	solute carrier family 27 (fatty acid transporter)	 member 1	Mm.38165	 74110315	chr8	 74110256	+	mm|8qB3.3	NM_011977	chr8:74110256-74110315	GO:0006629|GO:0001579|GO:0006646|GO:0001676|GO:0071902|GO:0005886|GO:0033211|GO:0005783|GO:0016874|GO:0009409|GO:0005743|GO:0003824|GO:0042803|GO:0005739|GO:0005737|GO:0000166|GO:0006631|GO:0006810|GO:0032049|GO:0031957|GO:0006654|GO:0006655|GO:0006656|GO:0015245|GO:0032868|GO:0005792|GO:0006661|GO:0071072|GO:0031410|GO:0004467|GO:0016020|GO:0005901|GO:0006869|GO:0008152|GO:0031652|GO:0016021|GO:0015908|GO:0015909|GO:0006659	NM_011977
A_51_P117494	13.286498	P	13.421089	P	0.910928042536083	    57370	B4galt3	Mus musculus UDP-Gal:betaGlcNAc beta 1	4-galactosyltransferase	 polypeptide 3 (B4galt3)	 mRNA [NM_020579]	UDP-Gal:betaGlcNAc beta 1	4-galactosyltransferase	 polypeptide 3	Mm.274011	173206766	chr1	173206707	+	mm|1qH3	NM_020579	chr1:173206707-173206766	GO:0008150|GO:0003674|GO:0005737|GO:0005794|GO:0016020|GO:0003945|GO:0016757|GO:0005975|GO:0003831|GO:0016021|GO:0046872|GO:0016740	NM_020579
A_51_P117567	4.380916	P	4.1342883	P	1.18643058941839	NA		Mus musculus adult male aorta and vein cDNA	 RIKEN full-length enriched library	 clone:A530026O16 product:unclassifiable	 full insert sequence. [AK040815]		Mm.446939	 42226274	chr10	 42226215	+	mm|10qB2	AK040815	chr10:42226215-42226274
A_51_P117581	11.40777	P	10.521302	P	1.84864473482759	    63955	Cables1	Mus musculus CDK5 and Abl enzyme substrate 1 (Cables1)	 transcript variant 2	 mRNA [NM_022021]	CDK5 and Abl enzyme substrate 1	Mm.40717	 12103990	chr18	 12103931	+	mm|18qA1	NM_022021	chr18:12103931-12103990	GO:0000082|GO:0051726|GO:0007399	NM_022021
A_51_P117600	9.565464	P	8.847366	P	1.64501187669349	   271457	Rab5a	Mus musculus RAB5A	 member RAS oncogene family (Rab5a)	 mRNA [NM_025887]	RAB5A	 member RAS oncogene family	Mm.329123	 53646253	chr17	 53646194	+	mm|17qC	NM_025887	chr17:53646194-53646253	GO:0030424|GO:0048471|GO:0005886|GO:0007264|GO:0003924|GO:0030139|GO:0015031|GO:0030425|GO:0014911|GO:0031623|GO:0051489|GO:0005737|GO:0000166|GO:0048169|GO:0043025|GO:0006810|GO:0019717|GO:0005525|GO:0048661|GO:0001726|GO:0008021|GO:0006897|GO:0006184|GO:0043234|GO:0051021|GO:0019001|GO:0042589|GO:0016020|GO:0045121|GO:0055037|GO:0019003|GO:0005769|GO:0010008|GO:0005768	NM_025887
A_51_P117604	12.870879	P	12.629656	P	1.18199423581648	   271457	Rab5a	Mus musculus RAB5A	 member RAS oncogene family (Rab5a)	 mRNA [NM_025887]	RAB5A	 member RAS oncogene family	Mm.329123	 53646721	chr17	 53646662	+	mm|17qC	NM_025887	chr17:53646662-53646721	GO:0030424|GO:0048471|GO:0005886|GO:0007264|GO:0003924|GO:0030139|GO:0015031|GO:0030425|GO:0014911|GO:0031623|GO:0051489|GO:0005737|GO:0000166|GO:0048169|GO:0043025|GO:0006810|GO:0019717|GO:0005525|GO:0048661|GO:0001726|GO:0008021|GO:0006897|GO:0006184|GO:0043234|GO:0051021|GO:0019001|GO:0042589|GO:0016020|GO:0045121|GO:0055037|GO:0019003|GO:0005769|GO:0010008|GO:0005768	NM_025887
A_51_P117612	3.5729747	A	3.8315969	A	0.835885824524104	   235134	Nfrkb	Mus musculus nuclear factor related to kappa B binding protein (Nfrkb)	 mRNA [NM_172766]	nuclear factor related to kappa B binding protein	Mm.238146	 31227495	chr9	 31227436	+	mm|9qA4	NM_172766	chr9:31227436-31227495	GO:0031011|GO:0008150|GO:0006355|GO:0006281|GO:0006310|GO:0005634|GO:0002020|GO:0003677|GO:0006974|GO:0006351	NM_172766
A_51_P117618	10.361793	P	10.467222	P	0.929528496788848	    66071	Ethe1	Mus musculus ethylmalonic encephalopathy 1 (Ethe1)	 nuclear gene encoding mitochondrial protein	 mRNA [NM_023154]	ethylmalonic encephalopathy 1	Mm.29553	 25393454	chr7	 25393395	+	mm|7qA3	NM_023154	chr7:25393395-25393454	GO:0005739|GO:0005737|GO:0016787|GO:0005634|GO:0046872	NM_023154
A_51_P117627	7.1067624	P	7.448064	P	0.789328857735843	    11423	Ache	Mus musculus acetylcholinesterase (Ache)	 mRNA [NM_009599]	acetylcholinesterase	Mm.255464	137735437	chr5	137735378	+	mm|5qG2	NM_009599	chr5:137735378-137735437	GO:0004091|GO:0033265|GO:0003990|GO:0030054|GO:0031594|GO:0060041|GO:0005518|GO:0045202|GO:0031225|GO:0043621|GO:0005615|GO:0042803|GO:0042802|GO:0031623|GO:0045211|GO:0042166|GO:0043025|GO:0005791|GO:0005794|GO:0009986|GO:0005605|GO:0045212|GO:0007416|GO:0007271|GO:0042734|GO:0043237|GO:0050775|GO:0043236|GO:0005788|GO:0006581|GO:0050772|GO:0050770|GO:0030424|GO:0043005|GO:0048471|GO:0005886|GO:0004104|GO:0005635|GO:0019695|GO:0030425|GO:0005737|GO:0017171|GO:0007155|GO:0051262|GO:0008291|GO:0005576|GO:0048814|GO:0001919|GO:0016787|GO:0016020|GO:0042135	NM_009599
A_51_P117640	6.439982	P	7.47909	P	0.486628256775102	    76082	5830468F06Rik	Mus musculus adult male thymus cDNA	 RIKEN full-length enriched library	 clone:5830468F06 product:unclassifiable	 full insert sequence. [AK018042]	RIKEN cDNA 5830468F06 gene		 15015191	chr8	 15015132	-	mm|8qA1.1	AK018042	chr8:15015191-15015132	GO:0008150|GO:0003674|GO:0005575
A_51_P117664	10.448449	P	10.452812	P	0.996980367141208	    67886	Camsap1l1	Mus musculus calmodulin regulated spectrin-associated protein 1-like 1 (Camsap1l1)	 mRNA [NM_001081360]	calmodulin regulated spectrin-associated protein 1-like 1	Mm.144143	138165212	chr1	138165153	-	mm|1qE4	NM_001081360	chr1:138165212-138165153	GO:0008150|GO:0003674|GO:0005737|GO:0005874|GO:0005575|GO:0005856	NM_001081360
A_51_P117666	12.015037	P	12.3306	P	0.80353735563598	    66293	1810032O08Rik	Mus musculus RIKEN cDNA 1810032O08 gene (1810032O08Rik)	 transcript variant 3	 non-coding RNA [NR_027821]	RIKEN cDNA 1810032O08 gene	Mm.432051	116537080	chr11	116537021	+	mm|11qE2	NR_027821	chr11:116537021-116537080	GO:0008150|GO:0003674|GO:0005575	NR_027821
A_51_P117711	6.680193	P	6.915414	P	0.849554849663117	   226562	Prrc2c	Mus musculus proline-rich coiled-coil 2C (Prrc2c)	 mRNA [NM_001081290]	proline-rich coiled-coil 2C	Mm.245446	164636137	chr1	164636078	-	mm|1qH2.1	NM_001081290	chr1:164636137-164636078	GO:0008150|GO:0005575|GO:0008022	NM_001081290
A_51_P117739	11.523132	P	12.304554	P	0.581793063119827	    14205	Figf	Mus musculus c-fos induced growth factor (Figf)	 mRNA [NM_010216]	c-fos induced growth factor	Mm.297978	160840454	chrX	160840395	+	mm|XqF5	NM_010216	chrX:160840395-160840454	GO:0005515|GO:0032755|GO:0048010|GO:0008284|GO:0030947|GO:0008283|GO:0060754|GO:0005576|GO:0007275|GO:0001525|GO:0042056|GO:0005615|GO:0042803|GO:0030154|GO:0050918|GO:0050930|GO:0016020|GO:0043185|GO:0043184|GO:0051781|GO:0005172|GO:0008083	NM_010216
A_51_P117752	8.936282	P	9.18704	P	0.840454719644174	    11889	Asgr1	Mus musculus asialoglycoprotein receptor 1 (Asgr1)	 mRNA [NM_009714]	asialoglycoprotein receptor 1	Mm.6559	 69871187	chr11	 69871128	+	mm|11qB3	NM_009714	chr11:69871128-69871187	GO:0016020|GO:0005488|GO:0031668|GO:0005529|GO:0004873|GO:0004872|GO:0016021|GO:0046872|GO:0042803|GO:0006897	NM_009714
A_51_P117777	13.459971	P	13.374643	P	1.06092891855457	    14430	Galt	Mus musculus galactose-1-phosphate uridyl transferase (Galt)	 mRNA [NM_016658]	galactose-1-phosphate uridyl transferase	Mm.439669	 41705530	chr4	 41705471	+	mm|4qA5	NM_016658	chr4:41705471-41705530	GO:0005975|GO:0008152|GO:0008108|GO:0016779|GO:0006258|GO:0008270|GO:0005625|GO:0006012|GO:0003824|GO:0046872|GO:0016740|GO:0005829	NM_016658
A_51_P117794	9.394022	P	9.278003	P	1.08374023938913	    12124	Bik	Mus musculus BCL2-interacting killer (Bik)	 mRNA [NM_007546]	BCL2-interacting killer	Mm.267006	 83374107	chr15	 83374048	+	mm|15qE1	NM_007546	chr15:83374048-83374107	GO:0032464|GO:0005515|GO:0051400|GO:0046982|GO:0090200|GO:0007283|GO:0006917|GO:0005740|GO:0008584	NM_007546
A_51_P117832	9.057796	P	9.205438	P	0.902724707820094	    78798	Eml4	Mus musculus echinoderm microtubule associated protein like 4 (Eml4)	 transcript variant 3	 mRNA [NM_199466]	echinoderm microtubule associated protein like 4	Mm.295565	 83878697	chr17	 83878638	+	mm|17qE4	NM_199466	chr17:83878638-83878697	GO:0008150|GO:0003674|GO:0005737|GO:0005874|GO:0005575|GO:0005856	NM_199466
A_51_P117835	6.945405	P	8.127923	P	0.440581859528728	   258433	Olfr933	Mus musculus olfactory receptor 933 (Olfr933)	 mRNA [NM_146441]	olfactory receptor 933	Mm.271361	 38783871	chr9	 38783812	+	mm|9qA5.1	NM_146441	chr9:38783812-38783871	GO:0007608|GO:0007165|GO:0004984|GO:0007186|GO:0004930|GO:0004872|GO:0016021|GO:0004871	NM_146441
A_51_P117865	12.063187	P	12.228433	P	0.891776445902138	    80752	Fam20c	Mus musculus family with sequence similarity 20	 member C (Fam20c)	 mRNA [NM_030565]	family with sequence similarity 20	 member C	Mm.320355	139285651	chr5	139285592	+	mm|5qG2	NM_030565	chr5:139285592-139285651	GO:0005576	NM_030565
A_51_P117881	2.3221111	A	2.319243	A	1.00198999284139	   259301	Leap2	Mus musculus liver-expressed antimicrobial peptide 2 (Leap2)	 mRNA [NM_153069]	liver-expressed antimicrobial peptide 2	Mm.24283	 53235857	chr11	 53235798	-	mm|11qB1.3	NM_153069	chr11:53235857-53235798	GO:0005576|GO:0042742	NM_153069
A_51_P117890	3.3723946	A	3.3851056	A	0.991228105730847	100379605	Gm15270	Mus musculus 0 day neonate head cDNA	 RIKEN full-length enriched library	 clone:4833407D20 product:connective tissue growth factor	 full insert sequence. [AK014660]	predicted gene 15270		 24309465	chr10	 24309406	-	mm|10qA4	AK014660	chr10:24309465-24309406	GO:0008150|GO:0003674|GO:0005575
A_51_P117903	12.259137	P	13.438313	P	0.441603649501387	NA		predicted gene	 16683 [Source:MGI Symbol;Acc:MGI:4439607] [ENSMUST00000103467]		Mm.342177	115232853	chr12	115232794	-	mm|12qF1	BC092269	chr12:115232853-115232794
A_51_P117924	3.1066499	A	2.3553772	A	1.68327710962175	    15405	Hoxa9	Mus musculus homeobox A9 (Hoxa9)	 mRNA [NM_010456]	homeobox A9	Mm.4694	 52174328	chr6	 52174269	-	mm|6qB3	NM_010456	chr6:52174328-52174269	GO:0005515|GO:0005667|GO:0006355|GO:0003700|GO:0048706|GO:0060216|GO:0005634|GO:0007275|GO:0009954|GO:0030879|GO:0009952|GO:0003677|GO:0006351|GO:0043565|GO:0005737|GO:0035115	NM_010456
A_51_P117933	2.277075	A	2.2729723	A	1.00284782230132	    21580	Tcrb-J	Mus musculus adult male thymus cDNA	 RIKEN full-length enriched library	 clone:5830405F06 product:similar to T-cell receptor beta chain precursor V-D-J regions (BW14) (fragment) [Mus musculus]	 full insert sequence. [AK017898]	T-cell receptor beta	 joining region	Mm.389744	 41012889	chr6	 41012830	+	mm|6qB1	AK017898	chr6:41012830-41012889
A_51_P117952	11.639346	P	12.419932	P	0.582130293050946	   193740	Hspa1a	Mus musculus heat shock protein 1A (Hspa1a)	 mRNA [NM_010479]	heat shock protein 1A	Mm.6388	 35106855	chr17	 35106796	-	mm|17qB1	NM_010479	chr17:35106855-35106796	GO:0005739|GO:0005515|GO:0044444|GO:0005737|GO:0006281|GO:0009408|GO:0000723|GO:0000166|GO:0006950|GO:0005524	NM_010479
A_51_P117995	12.63623	P	11.5696125	P	2.09451686384237	    18642	Pfkm	Mus musculus phosphofructokinase	 muscle (Pfkm)	 transcript variant 2	 mRNA [NM_021514]	phosphofructokinase	 muscle	Mm.272582	 97962772	chr15	 97962713	+	mm|15qF1	NM_021514	chr15:97962713-97962772	GO:0003824|GO:0051259|GO:0008443|GO:0046872|GO:0006096|GO:0046716|GO:0005829|GO:0042802|GO:0005737|GO:0016324|GO:0000166|GO:0051289|GO:0016301|GO:0032024|GO:0019900|GO:0006002|GO:0070061|GO:0003872|GO:0016208|GO:0070095|GO:0005529|GO:0005625|GO:0042593|GO:0008022|GO:0005524|GO:0016310|GO:0030388|GO:0008152|GO:0046835|GO:0016740|GO:0005945	NM_021514
A_51_P118012	6.262432	P	6.5931997	P	0.79511326826197	    18750	Prkca	Mus musculus protein kinase C	 alpha (Prkca)	 mRNA [NM_011101]	protein kinase C	 alpha	Mm.222178	107800094	chr11	107800035	-	mm|11qE1	NM_011101	chr11:107800094-107800035	GO:0005515|GO:0017148|GO:0050730|GO:0045921|GO:0006937|GO:0046777|GO:0000166|GO:0018105|GO:0002062|GO:0016301|GO:0018107|GO:0046325|GO:0007611|GO:0043025|GO:0019717|GO:0045822|GO:0032355|GO:0016772|GO:0051965|GO:0030593|GO:0050930|GO:0043536|GO:0016310|GO:0043234|GO:0002026|GO:0045121|GO:0005654|GO:0004698|GO:0008270|GO:0004697|GO:0019899|GO:0000302|GO:0001750|GO:0008285|GO:0005886|GO:0005783|GO:0045471|GO:0005634|GO:0046872|GO:0030425|GO:0005829|GO:0005739|GO:0000188|GO:0035556|GO:0005737|GO:0070555|GO:0048259|GO:0035408|GO:0046627|GO:0021955|GO:0006874|GO:0005624|GO:0048661|GO:0005524|GO:0035403|GO:0004672|GO:0016020|GO:0004674|GO:0050729|GO:0001934|GO:0001933|GO:0006468|GO:0006469|GO:0071322|GO:0016740|GO:0008629	NM_011101
A_51_P118024	2.367162	A	3.072608	A	0.613252876091750	   338364	Trim65	Mus musculus tripartite motif-containing 65 (Trim65)	 mRNA [NM_178802]	tripartite motif-containing 65	Mm.439976	115987257	chr11	115987198	-	mm|11qE2	NM_178802	chr11:115987257-115987198	GO:0008150|GO:0003674|GO:0005575	NM_178802
A_51_P118046	5.2971897	P	6.2266154	P	0.525067316085472	   244209	Cyp2r1	Mus musculus cytochrome P450	 family 2	 subfamily r	 polypeptide 1 (Cyp2r1)	 mRNA [NM_177382]	cytochrome P450	 family 2	 subfamily r	 polypeptide 1	Mm.108037	121693904	chr7	121693845	-	mm|7qF1	NM_177382	chr7:121693904-121693845	GO:0005792|GO:0005506|GO:0030343|GO:0005783|GO:0042359|GO:0009055|GO:0046872|GO:0004497|GO:0016020|GO:0047749|GO:0005789|GO:0016491|GO:0016705|GO:0008202|GO:0055114|GO:0020037	NM_177382
A_51_P118061	7.7866864	P	7.2208576	P	1.48023763251831	   270162	Elmod1	Mus musculus ELMO domain containing 1 (Elmod1)	 mRNA [NM_177769]	ELMO domain containing 1	Mm.259791	 53769135	chr9	 53767480	-	mm|9qA5.3	NM_177769	chr9:53769135-53767480	GO:0043547|GO:0006909|GO:0005575|GO:0005856|GO:0005096	NM_177769
A_51_P118103	9.230683	P	8.38773	P	1.79371788277899	    67544	Fam120b	Mus musculus family with sequence similarity 120	 member B (Fam120b)	 transcript variant 1	 mRNA [NM_024203]	family with sequence similarity 120	 member B	Mm.35039	 15570013	chr17	 15569954	+	mm|17qA2	NM_024203	chr17:15569954-15570013	GO:0006355|GO:0005634|GO:0030154|GO:0006351	NM_024203
A_51_P118132	11.715164	P	12.263807	P	0.683662879843328	    20482	Skil	Mus musculus SKI-like (Skil)	 transcript variant 1	 mRNA [NM_011386]	SKI-like	Mm.15406	 31021262	chr3	 31021203	+	mm|3qA3	NM_011386	chr3:31021203-31021262	GO:0005515|GO:0070306|GO:0005634|GO:0046332|GO:0032403|GO:0070208|GO:0070207|GO:0005737|GO:0000166|GO:0007179|GO:0007050|GO:0002260|GO:0030512|GO:0001669|GO:0003714|GO:0019904|GO:0001825|GO:0042981|GO:0000122|GO:0070848|GO:0005488|GO:0007519|GO:0003682|GO:0016605|GO:0045596|GO:0050772	NM_011386
A_51_P118168	11.125529	P	11.154733	P	0.979960837097856	    71834	Zbtb43	Mus musculus zinc finger and BTB domain containing 43 (Zbtb43)	 transcript variant 1	 mRNA [NM_027947]	zinc finger and BTB domain containing 43	Mm.44186	 33309244	chr2	 33309185	-	mm|2qB	NM_027947	chr2:33309244-33309185	GO:0005622|GO:0008150|GO:0003674|GO:0006355|GO:0008270|GO:0005634|GO:0003676|GO:0003677|GO:0046872|GO:0006351	NM_027947
A_51_P118188	2.444571	A	2.2035866	A	1.18179876796172	   109593	Lmo3	Mus musculus LIM domain only 3 (Lmo3)	 mRNA [NM_207222]	LIM domain only 3	Mm.44814	138313526	chr6	138313467	-	mm|6qG1	NM_207222	chr6:138313526-138313467	GO:0006355|GO:0008270|GO:0046872|GO:0006351	NM_207222
A_51_P118223	8.125975	P	7.6144104	P	1.4255954130394	   384864	Gm1943	Mus musculus predicted gene 1943 (Gm1943)	 non-coding RNA [NR_002928]	WD repeat domain 70 pseudogene	Mm.321312	  8043015	chr15	  8042956	-	mm|15qA1	NR_002928	chr15:8043015-8042956		NR_002928
A_51_P118225	8.372719	P	9.192976	P	0.566341046332619	    72058	Igsf5	Mus musculus immunoglobulin superfamily	 member 5 (Igsf5)	 transcript variant 3	 mRNA [NM_028078]	immunoglobulin superfamily	 member 5	Mm.119714	 96625415	chr16	 96625356	+	mm|16qC4	NM_028078	chr16:96625356-96625415	GO:0005515|GO:0016337|GO:0030054|GO:0016020|GO:0009986|GO:0005886|GO:0016021|GO:0005923|GO:0030165	NM_028078
A_51_P118237	13.9064665	P	13.81801	P	1.06323205081752	    20393	Sgk1	Mus musculus serum/glucocorticoid regulated kinase 1 (Sgk1)	 transcript variant 6	 mRNA [NM_011361]	serum/glucocorticoid regulated kinase 1	Mm.28405	 21719449	chr10	 21719390	+	mm|10qA3	NM_011361	chr10:21719390-21719449	GO:0005515|GO:0043005|GO:0048471|GO:0005783|GO:0030307|GO:0006883|GO:0005634|GO:0032880|GO:0005737|GO:0000166|GO:0018105|GO:0010765|GO:0016301|GO:0051726|GO:0043402|GO:0007019|GO:0016772|GO:0031115|GO:0048037|GO:0043066|GO:0032869|GO:0007616|GO:0048156|GO:0006950|GO:0006915|GO:0043423|GO:0005524|GO:0006974|GO:0016310|GO:0004672|GO:0004674|GO:0050775|GO:0048812|GO:0008542|GO:0006468|GO:0016740	NM_011361
A_51_P118246	12.276763	P	12.436001	P	0.895497928481081	    73873	Fam161a	Mus musculus family with sequence similarity 161	 member A (Fam161a)	 mRNA [NM_028672]	family with sequence similarity 161	 member A	Mm.252406	 22923683	chr11	 22923624	+	mm|11qA3.2	NM_028672	chr11:22923624-22923683	GO:0008150|GO:0003674|GO:0005813	NM_028672
A_51_P118284	5.7163744	P	6.480602	P	0.588768503175691	    27205	Podxl	Mus musculus podocalyxin-like (Podxl)	 mRNA [NM_013723]	podocalyxin-like	Mm.89918	 31473002	chr6	 31472943	-	mm|6qA3.3	NM_013723	chr6:31473002-31472943	GO:0005813|GO:0030335|GO:0005886|GO:0005730|GO:0042995|GO:0030175|GO:0050900|GO:0033634|GO:0015629|GO:0001726|GO:0030027|GO:0043231|GO:0005737|GO:0007162|GO:0016324|GO:0016020|GO:0016021|GO:0007155	NM_013723
A_51_P118300	6.7718325	P	7.4522066	P	0.624003445407852	    20618	Sncg	Mus musculus synuclein	 gamma (Sncg)	 mRNA [NM_011430]	synuclein	 gamma	Mm.282800	 35187648	chr14	 35186555	-	mm|14qB	NM_011430	chr14:35187648-35186555	GO:0030424|GO:0008344|GO:0003674|GO:0005737|GO:0043025|GO:0046928|GO:0043679|GO:0005856|GO:0014059	NM_011430
A_51_P118320	13.812191	P	13.491327	P	1.24907837196261	    28295	D10Jhu81e	Mus musculus DNA segment	 Chr 10	 Johns Hopkins University 81 expressed (D10Jhu81e)	 mRNA [NM_138601]	DNA segment	 Chr 10	 Johns Hopkins University 81 expressed	Mm.268691	 77624962	chr10	 77624903	-	mm|10qC1	NM_138601	chr10:77624962-77624903	GO:0005739|GO:0008150|GO:0003674	NM_138601
A_51_P118400	3.2650301	A	4.4179783	P	0.449705302463663	    74556	9130404H23Rik	Mus musculus RIKEN cDNA 9130404H23 gene (9130404H23Rik)	 mRNA [NM_028998]	RIKEN cDNA 9130404H23 gene	Mm.218634	 66904928	chr17	 66904869	-	mm|17qE1.1	NM_028998	chr17:66904928-66904869	GO:0008150|GO:0003674|GO:0005575	NM_028998
A_51_P118415	11.066538	P	11.830446	P	0.588898947415464	    74617	Scpep1	Mus musculus serine carboxypeptidase 1 (Scpep1)	 mRNA [NM_029023]	serine carboxypeptidase 1	Mm.34126	 88785854	chr11	 88785795	-	mm|11qC	NM_029023	chr11:88785854-88785795	GO:0008152|GO:0004180|GO:0005829	NM_029023
A_51_P118417	14.019575	P	14.684862	P	0.630563251946453	    74617	Scpep1	Mus musculus serine carboxypeptidase 1 (Scpep1)	 mRNA [NM_029023]	serine carboxypeptidase 1	Mm.34126	 88785405	chr11	 88785346	-	mm|11qC	NM_029023	chr11:88785405-88785346	GO:0008152|GO:0004180|GO:0005829	NM_029023
A_51_P118433	7.7749786	P	7.8378496	P	0.957357057393793	   668171	Zxda	Mus musculus zinc finger	 X-linked	 duplicated A (Zxda)	 non-coding RNA [NR_003292]	zinc finger	 X-linked	 duplicated A	Mm.426134	 92037721	chrX	 92037662	-	mm|XqC3	NR_003292	chrX:92037721-92037662		NR_003292
A_51_P118443	12.490691	P	12.905436	P	0.75015207420346	    76448	2310014H01Rik	Mus musculus RIKEN cDNA 2310014H01 gene (2310014H01Rik)	 transcript variant 1	 mRNA [NM_175242]	RIKEN cDNA 2310014H01 gene	Mm.359982	 36012321	chr17	 36012262	+	mm|17qB1	NM_175242	chr17:36012262-36012321	GO:0008150|GO:0003674|GO:0005737|GO:0003779|GO:0005575|GO:0005856	NM_175242
A_51_P118468	5.596749	P	5.295639	P	1.23209201218596	   545389	Cep170	Mus musculus adult male spinal cord cDNA	 RIKEN full-length enriched library	 clone:A330004A13 product:hypothetical protein	 full insert sequence. [AK039235]	centrosomal protein 170	Mm.269991	178703432	chr1	178703373	-	mm|1qH4	AK039235	chr1:178703432-178703373	GO:0008150|GO:0003674|GO:0005813|GO:0005737|GO:0005874|GO:0005856
A_51_P118506	8.352231	P	9.527896	P	0.442679662479889	    66722	Spag16	Mus musculus sperm associated antigen 16 (Spag16)	 transcript variant 2	 mRNA [NM_025728]	sperm associated antigen 16	Mm.440554	 70771583	chr1	 70771524	+	mm|1qC3	NM_025728	chr1:70771524-70771583	GO:0005515|GO:0005930|GO:0005874|GO:0005634|GO:0042995|GO:0007283|GO:0035085|GO:0035086|GO:0019861|GO:0005929|GO:0042384|GO:0005737|GO:0030030|GO:0005856	NM_025728
A_51_P118527	4.930416	P	6.631262	P	0.307605669699766	   327958	Pitpnm3	PITPNM family member 3 [Source:MGI Symbol;Acc:MGI:2685726] [ENSMUST00000142471]	PITPNM family member 3	Mm.351793	 71881614	chr11	 71881555	-	mm|11qB4	AK039594	chr11:71881614-71881555	GO:0008150|GO:0016020|GO:0005575|GO:0046872|GO:0008289
A_51_P118535	11.244806	P	11.3229685	P	0.947263368238492	    76967	2700049A03Rik	Mus musculus RIKEN cDNA 2700049A03 gene (2700049A03Rik)	 transcript variant 1	 mRNA [NM_001163378]	RIKEN cDNA 2700049A03 gene	Mm.87290	 72344167	chr12	 72344108	+	mm|12qC3	NM_001163378	chr12:72344108-72344167	GO:0008150|GO:0003674|GO:0005813	NM_001163378
A_51_P118539	11.581212	P	11.627357	P	0.968520841848524	    76967	2700049A03Rik	Mus musculus RIKEN cDNA 2700049A03 gene (2700049A03Rik)	 transcript variant 1	 mRNA [NM_001163378]	RIKEN cDNA 2700049A03 gene	Mm.87290	 72344213	chr12	 72344154	+	mm|12qC3	NM_001163378	chr12:72344154-72344213	GO:0008150|GO:0003674|GO:0005813	NM_001163378
A_51_P118545	5.918296	P	7.112702	P	0.436966322818869	    12309	S100g	Mus musculus S100 calcium binding protein G (S100g)	 mRNA [NM_009789]	S100 calcium binding protein G	Mm.6891	159400091	chrX	159400032	-	mm|XqF4	NM_009789	chrX:159400091-159400032	GO:0016323|GO:0016324|GO:0005509|GO:0005499	NM_009789
A_51_P118603	11.35519	P	11.742025	P	0.764805604209577	    77305	Wdr82	Mus musculus WD repeat domain containing 82 (Wdr82)	 mRNA [NM_029896]	WD repeat domain containing 82	Mm.265125	106093213	chr9	106093154	+	mm|9qF1	NM_029896	chr9:106093154-106093213	GO:0003674|GO:0035097|GO:0048188|GO:0005634|GO:0072357|GO:0000785|GO:0051568	NM_029896
A_51_P118637	12.077327	P	11.129765	P	1.92861075701172	    67302	Zc3h13	Mus musculus zinc finger CCCH type containing 13 (Zc3h13)	 mRNA [NM_026083]	zinc finger CCCH type containing 13	Mm.74704	 75727411	chr14	 75727352	+	mm|14qD3	NM_026083	chr14:75727352-75727411	GO:0008150|GO:0003674|GO:0005575|GO:0046872	NM_026083
A_51_P118650	10.059347	P	9.962099	P	1.06973095936861	    83669	Wdr6	Mus musculus WD repeat domain 6 (Wdr6)	 mRNA [NM_031392]	WD repeat domain 6	Mm.335454	108475096	chr9	108475037	-	mm|9qF2	NM_031392	chr9:108475096-108475037	GO:0003674|GO:0007049|GO:0005737|GO:0008285|GO:0007050	NM_031392
A_51_P118664	6.7856035	P	6.7091956	P	1.05438949368536	    22589	Atrx	Mus musculus 0 day neonate head cDNA	 RIKEN full-length enriched library	 clone:4833408C14 product:unclassifiable	 full insert sequence. [AK014663]	alpha thalassemia/mental retardation syndrome X-linked homolog (human)	Mm.485836	102994600	chrX	102994541	-	mm|XqD	AK014663	chrX:102994600-102994541	GO:0005515|GO:0000792|GO:0070087|GO:0003682|GO:0005634|GO:0030900|GO:0000228
A_51_P118671	11.971693	P	11.856682	P	1.08298330282950	    93760	Arid1a	Mus musculus AT rich interactive domain 1A (SWI-like) (Arid1a)	 mRNA [NM_001080819]	AT rich interactive domain 1A (SWI-like)	Mm.22478	133235351	chr4	133235292	-	mm|4qD3	NM_001080819	chr4:133235351-133235292	GO:0005515|GO:0071565|GO:0006355|GO:0006325|GO:0005625|GO:0005634|GO:0071564|GO:0003677|GO:0006351|GO:0007399|GO:0005622|GO:0005488|GO:0016514|GO:0042921|GO:0045893|GO:0030521|GO:0016568|GO:0030520	NM_001080819
A_51_P118688	5.1921625	P	4.975033	P	1.16241844449050	    18390	Oprm1	opioid receptor	 mu 1 [Source:MGI Symbol;Acc:MGI:97441] [ENSMUST00000105607]	opioid receptor	 mu 1	Mm.457998	  3587890	chr10	  3557952	-	mm|10qA1	AF260307	chr10:3587890-3557952	GO:0005886|GO:0032100|GO:0032839|GO:0007193|GO:0004988|GO:0004985|GO:0030425|GO:0007191|GO:0007610|GO:0043204|GO:0004872|GO:0007626|GO:0004871|GO:0004930|GO:0060079|GO:0005624|GO:0042383|GO:0007165|GO:0032590|GO:0007186|GO:0016020|GO:0044424|GO:0045121|GO:0016021|GO:0005925|GO:0031635|GO:0051930
A_51_P118704	13.196122	P	12.536323	P	1.57986249786841	    13120	Cyp4b1	Mus musculus cytochrome P450	 family 4	 subfamily b	 polypeptide 1 (Cyp4b1)	 mRNA [NM_007823]	cytochrome P450	 family 4	 subfamily b	 polypeptide 1	Mm.1840	115297586	chr4	115297527	-	mm|4qD1	NM_007823	chr4:115297586-115297527	GO:0005792|GO:0006725|GO:0070330|GO:0005506|GO:0005783|GO:0009055|GO:0018879|GO:0046872|GO:0004497|GO:0019825|GO:0016020|GO:0042738|GO:0008144|GO:0018917|GO:0018585|GO:0005789|GO:0016491|GO:0016705|GO:0055114|GO:0020037	NM_007823
A_51_P118712	12.846165	P	12.897597	P	0.964978028987872	    13353	Dgcr6	Mus musculus DiGeorge syndrome critical region gene 6 (Dgcr6)	 mRNA [NM_010047]	DiGeorge syndrome critical region gene 6	Mm.27155	 18071313	chr16	 18071254	+	mm|16qA3	NM_010047	chr16:18071254-18071313	GO:0008150|GO:0003674|GO:0005575	NM_010047
A_51_P118715	9.464018	P	9.28885	P	1.12909587892800	    67610	Rspry1	Mus musculus adult male olfactory brain cDNA	 RIKEN full-length enriched library	 clone:6430540K08 product:Hypothetical SPla and the RYanodine receptor	 full insert sequence. [AK032416]	ring finger and SPRY domain containing 1	Mm.109074	 97183388	chr8	 97183329	+	mm|8qC5	AK032416	chr8:97183329-97183388	GO:0008150|GO:0003674|GO:0008270|GO:0005576|GO:0005575|GO:0046872
A_51_P118720	9.081093	P	8.998105	P	1.05920952439009	    67610	Rspry1	Mus musculus ring finger and SPRY domain containing 1 (Rspry1)	 mRNA [NM_026274]	ring finger and SPRY domain containing 1	Mm.109074	 97183607	chr8	 97183548	+	mm|8qC5	NM_026274	chr8:97183548-97183607	GO:0008150|GO:0003674|GO:0008270|GO:0005576|GO:0005575|GO:0046872	NM_026274
A_51_P118727	7.66277	P	7.8343396	P	0.887876178347964	    76251	0610007P08Rik	Mus musculus RIKEN cDNA 0610007P08 gene (0610007P08Rik)	 transcript variant 1	 mRNA [NM_001013608]	RIKEN cDNA 0610007P08 gene	Mm.186610	 64000788	chr13	 64000729	+	mm|13qB3	NM_001013608	chr13:64000729-64000788	GO:0008026|GO:0004386|GO:0005634|GO:0005575|GO:0003676|GO:0003677|GO:0005524|GO:0006974|GO:0003674|GO:0008150|GO:0006281|GO:0000166|GO:0016787	NM_001013608
A_51_P118742	10.002828	P	10.301636	P	0.812923782144521	    13495	Drg2	Mus musculus developmentally regulated GTP binding protein 2 (Drg2)	 mRNA [NM_021354]	developmentally regulated GTP binding protein 2	Mm.41803	 60281827	chr11	 60281768	+	mm|11qB2	NM_021354	chr11:60281768-60281827	GO:0005739|GO:0005622|GO:0008150|GO:0003674|GO:0005737|GO:0000166|GO:0005525	NM_021354
A_51_P118763	10.39877	P	10.639785	P	0.846149798959343	   226747	Ahctf1	Mus musculus AT hook containing transcription factor 1 (Ahctf1)	 mRNA [NM_026375]	AT hook containing transcription factor 1	Mm.128165	181676542	chr1	181676483	-	mm|1qH4	NM_026375	chr1:181676542-181676483	GO:0030097|GO:0031965|GO:0006355|GO:0003700|GO:0005694|GO:0007275|GO:0005634|GO:0051292|GO:0015031|GO:0055085|GO:0003677|GO:0016363|GO:0006351|GO:0000910|GO:0007067|GO:0005737|GO:0007049|GO:0005643|GO:0006810|GO:0000776|GO:0051028|GO:0045893|GO:0000775|GO:0051301	NM_026375
A_51_P118765	15.790062	P	15.837355	P	0.967750464437038	    13627	Eef1a1	Mus musculus eukaryotic translation elongation factor 1 alpha 1 (Eef1a1)	 mRNA [NM_010106]	eukaryotic translation elongation factor 1 alpha 1	Mm.485613	 78326444	chr9	 78326385	-	mm|9qE1	NM_010106	chr9:78326444-78326385	GO:0005515|GO:0005737|GO:0000166|GO:0003924|GO:0005634|GO:0005525|GO:0003746|GO:0006412|GO:0006414|GO:0005829	NM_010106
A_51_P118779	9.872529	P	9.931703	P	0.959813493246903	   231855	C330006K01Rik	Mus musculus RIKEN cDNA C330006K01 gene (C330006K01Rik)	 mRNA [NM_172725]	RIKEN cDNA C330006K01 gene	Mm.78250	142954468	chr5	142954409	+	mm|5qG2	NM_172725	chr5:142954409-142954468	GO:0003674|GO:0005737|GO:0006281|GO:0005488|GO:0000724|GO:0005634|GO:0006974	NM_172725
A_51_P118822	4.687267	P	4.8328505	P	0.904013674033553	    52397	Zfp644	zinc finger protein 644 [Source:MGI Symbol;Acc:MGI:1277212] [ENSMUST00000142391]	zinc finger protein 644	Mm.249474	107119515	chr5	107119456	-	mm|5qE5	XR_107723	chr5:107119515-107119456	GO:0008150|GO:0003674|GO:0005575	XR_107723
A_51_P118868	4.3645973	P	3.9511523	P	1.33186236349081	   259023	Olfr1055	Mus musculus olfactory receptor 1055 (Olfr1055)	 mRNA [NM_147021]	olfactory receptor 1055	Mm.377794	 86187297	chr2	 86187238	-	mm|2qD	NM_147021	chr2:86187297-86187238	GO:0007608|GO:0007165|GO:0004984|GO:0007186|GO:0004930|GO:0004872|GO:0016021|GO:0004871	NM_147021
A_51_P118877	4.799807	P	5.06578	P	0.83163766230639	    16597	Klf12	Mus musculus 9.5 days embryo parthenogenote cDNA	 RIKEN full-length enriched library	 clone:B130039K17 product:unclassifiable	 full insert sequence. [AK045139]	Kruppel-like factor 12	Mm.458816	100545526	chr14	100545467	-	mm|14qE2.3	AK045139	chr14:100545526-100545467	GO:0006355|GO:0003700|GO:0045944|GO:0005575|GO:0000122|GO:0003677|GO:0006351
A_51_P118885	11.558865	P	11.592579	P	0.976902170945636	    17117	Amacr	Mus musculus alpha-methylacyl-CoA racemase (Amacr)	 nuclear gene encoding mitochondrial protein	 mRNA [NM_008537]	alpha-methylacyl-CoA racemase	Mm.2787	 10925198	chr15	 10925139	+	mm|15qA1	NM_008537	chr15:10925139-10925198	GO:0005739|GO:0006699|GO:0008300|GO:0008152|GO:0008206|GO:0016853|GO:0003824|GO:0008111|GO:0044255|GO:0005777	NM_008537
A_51_P118902	9.154032	P	9.85369	P	0.615718149261787	    17164	Mapkapk2	Mus musculus MAP kinase-activated protein kinase 2 (Mapkapk2)	 mRNA [NM_008551]	MAP kinase-activated protein kinase 2	Mm.221235	132953039	chr1	132952581	-	mm|1qE4	NM_008551	chr1:132953039-132952581	GO:0005634|GO:0007265|GO:0005524|GO:0005829|GO:0002756|GO:0016310|GO:0005737|GO:0004672|GO:0000166|GO:0004674|GO:0016301|GO:0002755|GO:0048255|GO:0016740|GO:0016772	NM_008551
A_51_P118945	7.699856	P	8.693828	P	0.502093516216668	    16184	Il2ra	Mus musculus interleukin 2 receptor mRNA	 3'UTR	 partial sequence. [AF054581]	interleukin 2 receptor	 alpha chain	Mm.915	 11614493	chr2	 11614432	+	mm|2qA1	AF054581	chr2:11614432-11614493	GO:0002437|GO:0050687|GO:0004911|GO:0043065|GO:0005886|GO:0009986|GO:0019221|GO:0006924|GO:0019976|GO:0050672|GO:0042130|GO:0042104|GO:0050777|GO:0016020|GO:0050728|GO:0008144|GO:0042102|GO:0004872|GO:0046013|GO:0016021|GO:0043029|GO:0045582|GO:0009897
A_51_P119016	9.851729	P	9.794682	P	1.04033415789028	    72344	Usp36	Mus musculus ubiquitin specific peptidase 36 (Usp36)	 mRNA [NM_001033528]	ubiquitin specific peptidase 36	Mm.232293	118124364	chr11	118123775	-	mm|11qE2	NM_001033528	chr11:118124364-118123775	GO:0008150|GO:0006511|GO:0003674|GO:0016787|GO:0005730|GO:0008233|GO:0005634|GO:0008234|GO:0004221	NM_001033528
A_51_P119031	11.05138	P	10.764042	P	1.22038639347911	    70646	Naa30	Mus musculus N(alpha)-acetyltransferase 30	 NatC catalytic subunit (Naa30)	 mRNA [NM_001081430]	N(alpha)-acetyltransferase 30	 NatC catalytic subunit	Mm.275688	 49810404	chr14	 49810345	+	mm|14qC1	NM_001081430	chr14:49810345-49810404	GO:0008150|GO:0003674|GO:0005737|GO:0008080|GO:0004596|GO:0008152|GO:0005575|GO:0016740|GO:0008415	NM_001081430
A_51_P119039	2.368373	A	3.1634922	A	0.576295556081641	    18168	Npy5r	Mus musculus neuropeptide Y receptor Y5 (Npy5r)	 mRNA [NM_016708]	neuropeptide Y receptor Y5	Mm.10685	 69204505	chr8	 69204446	-	mm|8qB3.2	NM_016708	chr8:69204505-69204446	GO:0060112|GO:0005886|GO:0004930|GO:0014050|GO:0007268|GO:0003214|GO:0045768|GO:0048661|GO:0003151|GO:0007165|GO:0005737|GO:0004983|GO:0016020|GO:0002675|GO:0007186|GO:0007218|GO:0001602|GO:0032229|GO:0001601|GO:0042755|GO:0004872|GO:0016021|GO:0004871	NM_016708
A_51_P119055	5.8644757	P	5.9298735	P	0.955681767353386	    20823	Ssb	Mus musculus autoantigen La (SS-B) mRNA	 complete cds. [L00993]	Sjogren syndrome antigen B	Mm.10508	 69709422	chr2	 69709345	+	mm|2qC2	L00993	chr2:69709345-69709422	GO:0006396|GO:0000166|GO:0030529|GO:0003723|GO:0005634|GO:0003676|GO:0008033
A_51_P119066	5.3518662	P	5.757024	P	0.755153690591628	    18256	Oc90	Mus musculus otoconin 90 (Oc90)	 mRNA [NM_010953]	otoconin 90	Mm.41776	 65707793	chr15	 65707734	-	mm|15qD1	NM_010953	chr15:65707793-65707734	GO:0016042|GO:0005198|GO:0005509|GO:0004623|GO:0005578|GO:0005576|GO:0006644	NM_010953
A_51_P119077	15.388222	P	15.306403	P	1.05835160613433	    18412	Sqstm1	Mus musculus sequestosome 1 (Sqstm1)	 mRNA [NM_011018]	sequestosome 1	Mm.40828	 50013729	chr11	 50013670	-	mm|11qB1.3	NM_011018	chr11:50013729-50013670	GO:0003712|GO:0005515|GO:0043130|GO:0008624|GO:0019901|GO:0006915|GO:0005634|GO:0006916|GO:0051291|GO:0046872|GO:0042803|GO:0030154|GO:0005829|GO:0005737|GO:0005080|GO:0001934|GO:0005654|GO:0008270|GO:0043122|GO:0042169|GO:0070530|GO:0005768	NM_011018
A_51_P119100	3.9720023	P	4.9980593	P	0.491050396147164	NA					 38754535	chr9	 38754476	+	mm|9qA5.1		chr9:038754476-038754535
A_51_P119106	16.044767	P	16.13983	P	0.936231362935658	    18458	Pabpc1	Mus musculus poly(A) binding protein	 cytoplasmic 1 (Pabpc1)	 mRNA [NM_008774]	poly(A) binding protein	 cytoplasmic 1	Mm.371570	 36525850	chr15	 36525791	-	mm|15qB3.1	NM_008774	chr15:36525850-36525791	GO:0030529|GO:0008143|GO:2000623|GO:0071013|GO:0008022|GO:0003729|GO:0005829	NM_008774
A_51_P119161	6.4500923	P	5.7807145	P	1.59038692359291	   218165	Ofcc1	Mus musculus orofacial clefting chromosomal breakpoint region 1 variant 1 mRNA	 complete cds. [AF548110]	orofacial cleft 1 candidate 1		 40375472	chr13	 40375413	-	mm|13qA3.3	AF548110	chr13:40375472-40375413	GO:0048471|GO:0005737|GO:0005783|GO:0015630|GO:0005829
A_51_P119215	4.606897	P	4.812024	P	0.867462321349978	NA		Mus musculus 0 day neonate eyeball cDNA	 RIKEN full-length enriched library	 clone:E130318F11 product:unclassifiable	 full insert sequence. [AK053887]			125805227	chr2	125805168	+	mm|2qF1	AK053887	chr2:125805168-125805227
A_51_P119239	5.1782484	P	5.790425	P	0.654208949244462	    22437	Xirp1	Mus musculus xin actin-binding repeat containing 1 (Xirp1)	 mRNA [NM_011724]	xin actin-binding repeat containing 1	Mm.10117	119923283	chr9	119923224	-	mm|9qF4	NM_011724	chr9:119923283-119923224	GO:0005916|GO:0003007|GO:0008285|GO:0005913|GO:0014704|GO:0005886|GO:0042391|GO:0045214|GO:0055013|GO:0031008	NM_011724
A_51_P119255	2.0704246	A	1.9427967	A	1.09249592613866	   258688	Olfr1462	Mus musculus olfactory receptor 1462 (Olfr1462)	 mRNA [NM_146693]	olfactory receptor 1462	Mm.271529	 13265610	chr19	 13265551	+	mm|19qA	NM_146693	chr19:13265551-13265610	GO:0007608|GO:0004984|GO:0007186|GO:0004872|GO:0016021	NM_146693
A_51_P119306	1.8687743	A	1.8766776	A	0.994536827589692	NA		Mus musculus 15 days embryo head cDNA	 RIKEN full-length enriched library	 clone:D930042J15 product:unclassifiable	 full insert sequence. [AK053070]			109855320	chr2	109855261	-	mm|2qE3	AK053070	chr2:109855320-109855261
A_51_P119315	5.1983137	P	3.4413655	A	3.3798241828032	NA		RIKEN cDNA 4930550G17 gene [Source:MGI Symbol;Acc:MGI:1922537] [ENSMUST00000129114]		Mm.159490	 69723895	chr2	 69723836	+	mm|2qC2	AK016085	chr2:69723836-69723895
A_51_P119358	3.2118318	A	2.7640474	A	1.36394398840476	    75480	1700003F12Rik	Mus musculus RIKEN cDNA 1700003F12 gene (1700003F12Rik)	 mRNA [NM_029305]	RIKEN cDNA 1700003F12 gene	Mm.440434	154375090	chr2	154374763	+	mm|2qH1	NM_029305	chr2:154374763-154375090	GO:0008150|GO:0003674|GO:0005575	NM_029305
A_51_P119387	7.631572	P	7.3481064	P	1.21711509399254	    75604	Tm4sf5	Mus musculus transmembrane 4 superfamily member 5 (Tm4sf5)	 mRNA [NM_029360]	transmembrane 4 superfamily member 5	Mm.24400	 70324564	chr11	 70324505	+	mm|11qB3	NM_029360	chr11:70324505-70324564	GO:0008150|GO:0003674|GO:0016021|GO:0005575	NM_029360
A_51_P119401	10.280748	P	10.043614	P	1.17864887766535	   544752	Tug1	Mus musculus taurine upregulated gene 1 (Tug1)	 transcript variant a	 non-coding RNA [NR_002321]	taurine upregulated gene 1	Mm.471608	  3540530	chr11	  3540471	-	mm|11qA1	NR_002321	chr11:3540530-3540471	GO:0042461|GO:0003674|GO:0005575	NR_002321
A_51_P119429	10.821974	P	11.456198	P	0.644287272233128	   105855	Nckap1l	Mus musculus NCK associated protein 1 like (Nckap1l)	 mRNA [NM_153505]	NCK associated protein 1 like	Mm.30805	103329159	chr15	103329100	+	mm|15qF3	NM_153505	chr15:103329100-103329159	GO:0050853|GO:0031209|GO:0001782|GO:0030890|GO:0032715|GO:0045579|GO:0043378|GO:0030011|GO:0032403|GO:0032855|GO:0042221|GO:0060100|GO:0005829|GO:0070358|GO:0030838|GO:0042102|GO:0002262|GO:0043029|GO:0030675|GO:0035509|GO:0043066|GO:0042493|GO:0045588|GO:0030593|GO:0033630|GO:0030295|GO:0032700|GO:0006461|GO:0045648|GO:0030866|GO:0043372|GO:0090023|GO:0001934|GO:0045621|GO:0042327	NM_153505
A_51_P119460	8.621849	P	9.285965	P	0.631075272362752	   108062	Cstf2	Mus musculus cleavage stimulation factor	 3' pre-RNA subunit 2 (Cstf2)	 mRNA [NM_133196]	cleavage stimulation factor	 3' pre-RNA subunit 2	Mm.67938	130618878	chrX	130618819	+	mm|XqE3	NM_133196	chrX:130618819-130618878	GO:0008380|GO:0006397|GO:0000166|GO:0003723|GO:0005847|GO:0005634|GO:0003676|GO:0071920	NM_133196
A_51_P119469	4.840828	P	4.070726	A	1.70539035209816	   111173	Erc1	Mus musculus ELKS/RAB6-interacting/CAST family member 1 (Erc1)	 transcript variant 1	 mRNA [NM_053204]	ELKS/RAB6-interacting/CAST family member 1	Mm.288860	119525347	chr6	119525288	-	mm|6qF1	NM_053204	chr6:119525347-119525288	GO:0005515|GO:0050790|GO:0017137|GO:0005737|GO:0005794|GO:0016020|GO:0007252|GO:0008385|GO:0006810|GO:0042147|GO:0030165|GO:0015031	NM_053204
A_51_P119525	2.0042968	A	2.0127492	A	0.994158371821195	NA		Mus musculus prostatic steroid-binding protein C1 chain mRNA	 complete cds. [AF277385]			NA		NA			AF277385
A_51_P119544	10.625248	P	10.422781	P	1.15066430280089	    11593	Aga	Mus musculus aspartylglucosaminidase (Aga)	 transcript variant 1	 mRNA [NM_001005847]	aspartylglucosaminidase	Mm.334535	 54601379	chr8	 54601320	+	mm|8qB1.3	NM_001005847	chr8:54601320-54601379	GO:0051604|GO:0033345|GO:0016787|GO:0005783|GO:0015630|GO:0006517|GO:0003948|GO:0045111|GO:0043621|GO:0005764|GO:0043231	NM_001005847
A_51_P119588	6.965172	P	5.902196	P	2.08923676987354	NA		RIKEN cDNA 2010003O02 gene [Source:MGI Symbol;Acc:MGI:1913684] [ENSMUST00000129758]			 40217864	chr4	 40217805	+	mm|4qA5	AK008077	chr4:40217805-40217864
A_51_P119597	13.76361	P	13.952177	P	0.877476868742779	    11774	Ap3b1	Mus musculus adaptor-related protein complex 3	 beta 1 subunit (Ap3b1)	 mRNA [NM_009680]	adaptor-related protein complex 3	 beta 1 subunit	Mm.21185	 95336116	chr13	 95336057	+	mm|13qD1	NM_009680	chr13:95336057-95336116	GO:0005802|GO:0051138|GO:0019882|GO:0007596|GO:0032438|GO:0019903|GO:0048007|GO:0006622|GO:0016192|GO:0006886	NM_009680
A_51_P119633	10.486665	P	9.557502	P	1.90417094376952	    14296	Frat1	Mus musculus frequently rearranged in advanced T-cell lymphomas (Frat1)	 mRNA [NM_008043]	frequently rearranged in advanced T-cell lymphomas	Mm.4573	 41906883	chr19	 41906824	+	mm|19qC3	NM_008043	chr19:41906824-41906883	GO:0005737|GO:0000578|GO:0016055	NM_008043
A_51_P119636	5.3656673	P	5.509715	P	0.904976541039816	    11980	Atp8a1	Mus musculus ATPase	 aminophospholipid transporter (APLT)	 class I	 type 8A	 member 1 (Atp8a1)	 transcript variant 1	 mRNA [NM_001038999]	ATPase	 aminophospholipid transporter (APLT)	 class I	 type 8A	 member 1	Mm.153230	 68042837	chr5	 68039772	-	mm|5qC3.1	NM_001038999	chr5:68042837-68039772	GO:0000287|GO:0005886|GO:0031410|GO:0003824|GO:0005524|GO:0046872|GO:0015662|GO:0006754|GO:0034220|GO:0000166|GO:0015914|GO:0016020|GO:0016787|GO:0004012|GO:0008152|GO:0016820|GO:0016021	NM_001038999
A_51_P119670	9.387852	P	9.61776	P	0.852689265636994	    14537	Gcnt1	Mus musculus glucosaminyl (N-acetyl) transferase 1	 core 2 (Gcnt1)	 transcript variant 3	 mRNA [NM_010265]	glucosaminyl (N-acetyl) transferase 1	 core 2	Mm.244825	 17403445	chr19	 17403386	-	mm|19qB	NM_010265	chr19:17403445-17403386	GO:0003829|GO:0060993|GO:0048729|GO:0005615	NM_010265
A_51_P119715	13.926355	P	13.60324	P	1.25102879805354	    26901	Deb1	Mus musculus differentially expressed in B16F10 1 (Deb1)	 mRNA [NM_026794]	differentially expressed in B16F10 1	Mm.24848	121622013	chr9	121621954	+	mm|9qF4	NM_026794	chr9:121621954-121622013		NM_026794
A_51_P119726	4.209519	P	4.796433	P	0.66576549215408	NA					108242737	chr9	108242678	+	mm|9qF2		chr9:108242678-108242737
A_51_P119749	7.5943265	P	8.615973	P	0.492553895926574	    68760	Synpo2l	synaptopodin 2-like [Source:MGI Symbol;Acc:MGI:1916010] [ENSMUST00000057090]	synaptopodin 2-like	Mm.35789	 21478289	chr14	 21478230	-	mm|14qA3	AK084541	chr14:21478289-21478230	GO:0008150|GO:0003674|GO:0005737|GO:0003779|GO:0005575|GO:0005856
A_51_P119760	13.546726	P	14.552875	P	0.497873454054282	    14960	H2-Aa	Mus musculus histocompatibility 2	 class II antigen A	 alpha (H2-Aa)	 mRNA [NM_010378]	histocompatibility 2	 class II antigen A	 alpha	Mm.235338	 34420686	chr17	 34420627	-	mm|17qB1	NM_010378	chr17:034420686-034420627	GO:0005515|GO:0005886|GO:0048002|GO:0002504|GO:0042613|GO:0005764|GO:0019886|GO:0006955|GO:0016020|GO:0019882|GO:0042605|GO:0016021|GO:0034341|GO:0045582|GO:0009897	NM_010378
A_51_P119771	11.766353	P	11.6132965	P	1.11192270268831	    57890	Il17re	Mus musculus interleukin 17 receptor E (Il17re)	 transcript variant 1	 mRNA [NM_145826]	interleukin 17 receptor E	Mm.131781	113420206	chr6	113420147	+	mm|6qE3	NM_145826	chr6:113420147-113420206	GO:0005737|GO:0016020|GO:0005576|GO:0004872|GO:0016021	NM_145826
A_51_P119776	7.92506	P	8.66196	P	0.600027280466988	   118449	Synpo2	synaptopodin 2 [Source:MGI Symbol;Acc:MGI:2153070] [ENSMUST00000051443]	synaptopodin 2	Mm.474733	122814029	chr3	122813970	-	mm|3qG1	AK004418	chr3:122814029-122813970	GO:0005515|GO:0071889|GO:0051371|GO:0030018|GO:0005737|GO:0005634|GO:0003779
A_51_P119841	10.982826	P	11.350684	P	0.774932201379592	NA					NA		NA
A_51_P119857	10.967628	P	11.145786	P	0.883830731048	   114715	Spred1	sprouty protein with EVH-1 domain 1	 related sequence [Source:MGI Symbol;Acc:MGI:2150016] [ENSMUST00000028829]	sprouty protein with EVH-1 domain 1	 related sequence	Mm.397626	117007909	chr2	117007850	+	mm|2qE5	AK017680	chr2:117007850-117007909	GO:0005515|GO:0000188|GO:0016020|GO:0005886|GO:0007275|GO:0005634|GO:0009966|GO:0005173
A_51_P119882	1.9883041	A	2.0210588	A	0.977551964467442	   270711	Fam26d	Mus musculus family with sequence similarity 26	 member D (Fam26d)	 mRNA [NM_001081165]	family with sequence similarity 26	 member D	Mm.303077	 33759195	chr10	 33759136	-	mm|10qB1	NM_001081165	chr10:33759195-33759136	GO:0008150|GO:0003674|GO:0016020|GO:0016021|GO:0005575	NM_001081165
A_51_P119890	4.4873753	P	4.79692	P	0.80689636739715	    71148	Mier1	mesoderm induction early response 1 homolog (Xenopus laevis [Source:MGI Symbol;Acc:MGI:1918398] [ENSMUST00000128536]	mesoderm induction early response 1 homolog (Xenopus laevis		102832117	chr4	102832058	+	mm|4qC6	AK043136	chr4:102832058-102832117	GO:0007165|GO:0006355|GO:0005634|GO:0004871|GO:0043123|GO:0003677|GO:0006351
A_51_P119900	4.002199	P	3.6482053	A	1.27809378197613	   214685	Chadl	Mus musculus 15 days embryo head cDNA	 RIKEN full-length enriched library	 clone:D930017K21 product:hypothetical Cysteine-rich flanking region	 C-terminal/Leucine-rich repeat/Leucine-rich repeat	 typical subtype containing protein	 full insert sequence. [AK086273]	chondroadherin-like		 81512634	chr15	 81512575	-	mm|15qE1	AK086273	chr15:81512634-81512575	GO:0008150|GO:0003674|GO:0005575
A_51_P119923	11.366789	P	11.668139	P	0.811492687740953	    18813	Pa2g4	Mus musculus proliferation-associated 2G4 (Pa2g4)	 mRNA [NM_011119]	proliferation-associated 2G4	Mm.4742	127997151	chr10	127996543	-	mm|10qD3	NM_011119	chr10:127997151-127996543	GO:0006355|GO:0003700|GO:0009987|GO:0003723|GO:0006364|GO:0005730|GO:0005634|GO:0003677|GO:0006351|GO:0006417|GO:0005737|GO:0016787|GO:0030529|GO:0045892|GO:0031625	NM_011119
A_51_P119932	8.227573	P	9.133442	P	0.533711129007532	    71302	Arhgap26	Mus musculus Rho GTPase activating protein 26 (Arhgap26)	 mRNA [NM_175164]	Rho GTPase activating protein 26	Mm.329396	 39531561	chr18	 39531502	+	mm|18qB3	NM_175164	chr18:39531502-39531561	GO:0017124|GO:0030054|GO:0005575|GO:0005622|GO:0043547|GO:0003674|GO:0007165|GO:0008150|GO:0005737|GO:0046847|GO:0005856|GO:0008093|GO:0005096	NM_175164
A_51_P119947	4.3075156	P	5.061322	P	0.593036825931285	NA		Mus musculus 10 days neonate cerebellum cDNA	 RIKEN full-length enriched library	 clone:B930074M18 product:unclassifiable	 full insert sequence. [AK047477]		Mm.442464	 77087071	chr16	 77087012	+	mm|16qC3.1	AK047477	chr16:77087012-77087071
A_51_P119986	9.419074	P	9.188929	P	1.17295283250534	    16558	Kif16b	Mus musculus kinesin family member 16B (Kif16b)	 mRNA [NM_001081133]	kinesin family member 16B	Mm.251934	142444772	chr2	142444713	-	mm|2qG1	NM_001081133	chr2:142444772-142444713	GO:0045022|GO:0008289|GO:0005737|GO:0007154|GO:0000166|GO:0007173|GO:0008574|GO:0006810|GO:0005856|GO:0007018|GO:0001704|GO:0017137|GO:0043325|GO:0005874|GO:0080025|GO:0005547|GO:0032266|GO:0003777|GO:0006895|GO:0005524|GO:0050790|GO:0001919|GO:0007492|GO:0016020|GO:0008543|GO:0032801|GO:0008152|GO:0035091|GO:0005769|GO:0005768	NM_001081133
A_51_P120008	8.4677105	P	8.269215	P	1.14750107087765	    72404	Wdr44	Mus musculus WD repeat domain 44 (Wdr44)	 mRNA [NM_175180]	WD repeat domain 44	Mm.423	 23382997	chrX	 23382938	+	mm|XqA2	NM_175180	chrX:23382938-23382997	GO:0030334|GO:0048471|GO:0017137|GO:0005737|GO:0005794|GO:0016020|GO:0005874|GO:0005768	NM_175180
A_51_P120024	9.1354475	P	8.882585	P	1.19156900341644	   207728	Pde2a	Mus musculus phosphodiesterase 2A	 cGMP-stimulated (Pde2a)	 transcript variant 2	 mRNA [NM_001008548]	phosphodiesterase 2A	 cGMP-stimulated	Mm.247564	108660918	chr7	108660859	+	mm|7qE3	NM_001008548	chr7:108660859-108660918	GO:0030552|GO:0030553|GO:0016787|GO:0004118|GO:0047555|GO:0046069|GO:0045121|GO:0046872|GO:0042803|GO:0006198|GO:0005829	NM_001008548
A_51_P120027	2.2763994	A	2.2660236	A	1.0072178807467	   639769	Adh6-ps1	Mus musculus alcohol dehydrogenase 6 (class V)	 pseudogene 1 (Adh6-ps1)	 non-coding RNA [NR_033581]	alcohol dehydrogenase 6 (class V)	 pseudogene 1	Mm.484043	138051045	chr3	138050986	+	mm|3qG3	NR_033581	chr3:138050986-138051045		NR_033581
A_51_P120066	10.968059	P	9.850878	P	2.16922695104656	   414085	9330151L19Rik	Mus musculus RIKEN cDNA 9330151L19 gene (9330151L19Rik)	 non-coding RNA [NR_033222]	RIKEN cDNA 9330151L19 gene	Mm.256223	 70300781	chr12	 70300722	+	mm|12qC2	NR_033222	chr12:70300722-70300781	GO:0008150|GO:0003674|GO:0005575	NR_033222
A_51_P120093	11.878213	P	12.147103	P	0.82995786430247	    71982	Snx10	Mus musculus sorting nexin 10 (Snx10)	 transcript variant 1	 mRNA [NM_028035]	sorting nexin 10	Mm.294166	 51540171	chr6	 51540112	+	mm|6qB3	NM_028035	chr6:51540112-51540171	GO:0005545|GO:0005737|GO:0007154|GO:0016020|GO:0031313|GO:0006810|GO:0007032|GO:0035091|GO:0015031|GO:0008289|GO:0005768	NM_028035
A_51_P120097	5.88031	P	6.706536	P	0.56400271007093	    73699	Ppp2r1b	Mus musculus protein phosphatase 2 (formerly 2A)	 regulatory subunit A (PR 65)	 beta isoform (Ppp2r1b)	 transcript variant 1	 mRNA [NM_001034085]	protein phosphatase 2 (formerly 2A)	 regulatory subunit A (PR 65)	 beta isoform	Mm.7726	 50700813	chr9	 50699816	+	mm|9qA5.3	NM_001034085	chr9:50699816-50700813	GO:0008150|GO:0003674|GO:0005488|GO:0005575	NM_001034085
A_51_P120137	9.181175	P	8.842682	P	1.26443510937299	   381110	Fam82a1	Mus musculus family with sequence similarity 82	 member A1 (Fam82a1)	 mRNA [NM_201361]	family with sequence similarity 82	 member A1	Mm.293063	 80081230	chr17	 80081171	+	mm|17qE3	NM_201361	chr17:80081171-80081230	GO:0005739|GO:0008150|GO:0003674|GO:0005737|GO:0016020|GO:0005488|GO:0005874|GO:0016021|GO:0005856	NM_201361
A_51_P120201	14.498257	P	14.555925	P	0.960815946153131	   276770	Eif5a	Mus musculus eukaryotic translation initiation factor 5A (Eif5a)	 transcript variant 5	 mRNA [NM_181582]	eukaryotic translation initiation factor 5A	Mm.18026	 69730788	chr11	 69730729	-	mm|11qB3	NM_181582	chr11:69730788-69730729	GO:0008284|GO:0005783|GO:0003723|GO:0005634|GO:0003746|GO:0015031|GO:0006412|GO:0030425|GO:0006414|GO:0005829|GO:0045905|GO:0006452|GO:0005737|GO:0006406|GO:0005643|GO:0005642|GO:0006611|GO:0006810|GO:0043025|GO:0017070|GO:0045901|GO:0043066|GO:0008612|GO:0006915|GO:0006917|GO:0055085|GO:0006913|GO:0051149|GO:0047485|GO:0016020|GO:0043022|GO:0051028	NM_181582
A_51_P120220	10.088831	P	10.290455	P	0.869571161100262	    74206	Sipa1l3	Mus musculus signal-induced proliferation-associated 1 like 3 (Sipa1l3)	 mRNA [NM_001081028]	signal-induced proliferation-associated 1 like 3	Mm.485146	 30105677	chr7	 30105618	-	mm|7qB1	NM_001081028	chr7:30105677-30105618	GO:0008150|GO:0003674|GO:0005575	NM_001081028
A_51_P120233	2.5135334	A	2.8081865	A	0.815268342356676	NA		Mus musculus adult male urinary bladder cDNA	 RIKEN full-length enriched library	 clone:9530016N11 product:unclassifiable	 full insert sequence. [AK035327]		Mm.299254	129910414	chr8	129910355	+	mm|8qE2	AK035327	chr8:129910355-129910414
A_51_P120239	9.507419	P	10.108996	P	0.659033176898413	    19285	Ptrf	Mus musculus polymerase I and transcript release factor (Ptrf)	 mRNA [NM_008986]	polymerase I and transcript release factor	Mm.21864	100818838	chr11	100818779	-	mm|11qD	NM_008986	chr11:100818838-100818779	GO:0005515|GO:0006353|GO:0005792|GO:0006355|GO:0005886|GO:0005783|GO:0003723|GO:0006363|GO:0006361|GO:0005634|GO:0019843|GO:0006351|GO:0005739|GO:0005737|GO:0016020|GO:0005901|GO:0005654|GO:0042134	NM_008986
A_51_P120254	9.174506	P	9.478002	P	0.81028649468382	    50788	Fbxl8	Mus musculus F-box and leucine-rich repeat protein 8 (Fbxl8)	 mRNA [NM_015821]	F-box and leucine-rich repeat protein 8	Mm.334764	107792994	chr8	107792935	+	mm|8qD3	NM_015821	chr8:107792935-107792994	GO:0008150|GO:0003674|GO:0005575	NM_015821
A_51_P120257	12.687	P	12.261308	P	1.34321663268764	    50995	Uba2	Mus musculus ubiquitin-like modifier activating enzyme 2 (Uba2)	 mRNA [NM_016682]	ubiquitin-like modifier activating enzyme 2	Mm.27560	 34926129	chr7	 34926070	-	mm|7qB1	NM_016682	chr7:34926129-34926070	GO:0046982|GO:0016874|GO:0016925|GO:0005634|GO:0008641|GO:0003824|GO:0005524|GO:0019948|GO:0046872|GO:0000166|GO:0005488|GO:0006464|GO:0008134	NM_016682
A_51_P120275	3.4854891	A	3.7018354	A	0.860742553592658	    53601	Pcdh12	Mus musculus protocadherin 12 (Pcdh12)	 mRNA [NM_017378]	protocadherin 12	Mm.12862	 38441272	chr18	 38441213	-	mm|18qB3	NM_017378	chr18:38441272-38441213	GO:0016339|GO:0060711|GO:0030054|GO:0016020|GO:0005886|GO:0005911|GO:0005887|GO:0005977|GO:0005509|GO:0016021|GO:0007155|GO:0007156	NM_017378
A_51_P120295	5.852331	P	6.2959456	P	0.735290066557287	    76279	Cyp2d26	Mus musculus cytochrome P450	 family 2	 subfamily d	 polypeptide 26 (Cyp2d26)	 mRNA [NM_029562]	cytochrome P450	 family 2	 subfamily d	 polypeptide 26	Mm.439931	 82620634	chr15	 82620575	-	mm|15qE1	NM_029562	chr15:82620634-82620575	GO:0005792|GO:0070330|GO:0005506|GO:0005783|GO:0042493|GO:0009055|GO:0046872|GO:0004497|GO:0016020|GO:0016491|GO:0016712|GO:0016705|GO:0020037|GO:0055114	NM_029562
A_51_P120305	13.525116	P	13.977783	P	0.730690826413146	    54325	Elovl1	Mus musculus elongation of very long chain fatty acids (FEN1/Elo2	 SUR4/Elo3	 yeast)-like 1 (Elovl1)	 transcript variant 1	 mRNA [NM_001039176]	elongation of very long chain fatty acids (FEN1/Elo2	 SUR4/Elo3	 yeast)-like 1	Mm.282096	118105084	chr4	118105025	+	mm|4qD2.1	NM_001039176	chr4:118105025-118105084	GO:0009922|GO:0008610|GO:0016020|GO:0005783|GO:0030148|GO:0019367|GO:0019432|GO:0034625|GO:0006633|GO:0016021|GO:0042761|GO:0016740	NM_001039176
A_51_P120356	1.8640287	A	1.8689349	A	0.996605057197313	    66568	Rwdd3	RWD domain containing 3 [Source:MGI Symbol;Acc:MGI:1920420] [ENSMUST00000098650]	RWD domain containing 3	Mm.263163	120874000	chr3	120873941	-	mm|3qG1	BC150838	chr3:120874000-120873941	GO:0008150|GO:0003674|GO:0005575
A_51_P120388	2.117179	A	2.148671	A	0.978407928593368	    66696	Snx31	Mus musculus sorting nexin 31 (Snx31)	 mRNA [NM_025712]	sorting nexin 31	Mm.253627	 36434113	chr15	 36434054	-	mm|15qB3.1	NM_025712	chr15:36434113-36434054	GO:0007154|GO:0006810|GO:0035091|GO:0015031	NM_025712
A_51_P120398	3.1149244	A	2.6730292	A	1.35838760521081	    66772	Asb17	Mus musculus ankyrin repeat and SOCS box-containing 17 (Asb17)	 mRNA [NM_025758]	ankyrin repeat and SOCS box-containing 17	Mm.116960	153516514	chr3	153516456	+	mm|3qH3	NM_025758	chr3:153516456-153516514	GO:0035556|GO:0008150|GO:0003674|GO:0005575	NM_025758
A_51_P120415	4.055159	A	2.25476	A	3.48316544416206	   258738	Olfr507	Mus musculus olfactory receptor 507 (Olfr507)	 mRNA [NM_146743]	olfactory receptor 507	Mm.377666	115766256	chr7	115766197	+	mm|7qE3	NM_146743	chr7:115766197-115766256	GO:0007608|GO:0007165|GO:0004984|GO:0016020|GO:0007186|GO:0005886|GO:0004930|GO:0004872|GO:0016021|GO:0004871|GO:0050896	NM_146743
A_51_P120448	8.747434	P	8.702265	P	1.03180403968062	    52665	Echdc1	Mus musculus enoyl Coenzyme A hydratase domain containing 1 (Echdc1)	 transcript variant 1	 mRNA [NM_025855]	enoyl Coenzyme A hydratase domain containing 1	Mm.28930	 29065197	chr10	 29065138	+	mm|10qA4	NM_025855	chr10:29065138-29065197	GO:0008150|GO:0003674|GO:0008152|GO:0005575|GO:0003824	NM_025855
A_51_P120461	11.62762	P	11.924021	P	0.814281200508663	    67014	Mina	Mus musculus myc induced nuclear antigen (Mina)	 mRNA [NM_025910]	myc induced nuclear antigen	Mm.289150	 59491954	chr16	 59491895	+	mm|16qC1.3	NM_025910	chr16:59491895-59491954	GO:0003674|GO:0005737|GO:0008283|GO:0042254|GO:0042127|GO:0005730|GO:0005634	NM_025910
A_51_P120470	10.47323	P	11.180067	P	0.612661882413721	    12514	Cd68	Mus musculus CD68 antigen (Cd68)	 mRNA [NM_009853]	CD68 antigen	Mm.15819	 69478373	chr11	 69478314	-	mm|11qB3	NM_009853	chr11:69478373-69478314	GO:0016020|GO:0005886|GO:0016021|GO:0005764|GO:0005768	NM_009853
A_51_P120589	9.755708	P	3.8554337	P	59.7254659979739	   259001	Olfr181	Mus musculus olfactory receptor 181 (Olfr181)	 mRNA [NM_146999]	olfactory receptor 181	Mm.223388	 58925776	chr16	 58925717	-	mm|16qC1.2	NM_146999	chr16:58925776-58925717	GO:0007608|GO:0007165|GO:0004984|GO:0007186|GO:0004930|GO:0004872|GO:0016021|GO:0004871	NM_146999
A_51_P120608	10.907784	P	10.665415	P	1.18293352201043	    99730	Taf13	Mus musculus TAF13 RNA polymerase II	 TATA box binding protein (TBP)-associated factor (Taf13)	 mRNA [NM_025444]	TAF13 RNA polymerase II	 TATA box binding protein (TBP)-associated factor	Mm.24431	108384772	chr3	108384713	+	mm|3qF3	NM_025444	chr3:108384713-108384772	GO:0005515|GO:0006368|GO:0006355|GO:0006367|GO:0005669|GO:0006366|GO:0005654|GO:0005634|GO:0008022|GO:0003677|GO:0006351	NM_025444
A_51_P120615	8.342733	P	8.18221	P	1.11769224593352	    67657	Rabl3	Mus musculus RAB	 member of RAS oncogene family-like 3 (Rabl3)	 mRNA [NM_001042499]	RAB	 member of RAS oncogene family-like 3	Mm.28158	 37572210	chr16	 37572151	+	mm|16qB3	NM_001042499	chr16:37572151-37572210	GO:0008150|GO:0003674|GO:0000166|GO:0007264|GO:0005575|GO:0005525	NM_001042499
A_51_P120636	5.6168423	P	5.5411286	P	1.05388226167067	    13555	E2f1	Mus musculus E2F transcription factor 1 (E2f1)	 mRNA [NM_007891]	E2F transcription factor 1	Mm.18036	154385801	chr2	154385742	-	mm|2qH1	NM_007891	chr2:154385801-154385742	GO:0005515|GO:0003700|GO:0005634|GO:0048146|GO:2000045|GO:0005739|GO:0005737|GO:0045944|GO:0035189|GO:0051726|GO:0048255|GO:0005667|GO:0006355|GO:0006915|GO:0000122|GO:0003677|GO:0006351|GO:0071930|GO:0010628|GO:0043565|GO:0007049|GO:0005654|GO:0030900|GO:0045893|GO:0045892|GO:0008134	NM_007891
A_51_P120645	3.7613325	A	3.8340487	A	0.950846128691346	    69464	Krtap4-13	Mus musculus keratin associated protein 4-13 (Krtap4-13)	 mRNA [NM_027087]	keratin associated protein 4-13	Mm.158279	 99659510	chr11	 99659451	-	mm|11qD	NM_027087	chr11:99659510-99659451	GO:0005882|GO:0008150|GO:0003674|GO:0005575	NM_027087
A_51_P120674	11.063292	P	11.517073	P	0.730126829607921	    13713	Elk3	Mus musculus ELK3	 member of ETS oncogene family (Elk3)	 transcript variant 1	 mRNA [NM_013508]	ELK3	 member of ETS oncogene family	Mm.4454	 92710173	chr10	 92710161	-	mm|10qC2	NM_013508	chr10:92710173-92710161	GO:0005739|GO:0006355|GO:0003700|GO:0003714|GO:0042060|GO:0005634|GO:0032422|GO:0001525|GO:0045892|GO:0003677|GO:0043231	NM_013508
A_51_P120680	2.3679924	A	2.0147467	A	1.27743129522018	   386626	Zfp640	Mus musculus ES cells cDNA	 RIKEN full-length enriched library	 clone:C330008D03 product:weakly similar to KRUPPEL-RELATED ZINC FINGER PROTEIN F80-L [Mus musculus]	 full insert sequence. [AK082760]	zinc finger protein 640	Mm.183391	 66928112	chr13	 66928053	-	mm|13qB3	AK082760	chr13:66928112-66928053	GO:0010761|GO:0003674|GO:0010763|GO:0060325|GO:0040014|GO:0060021|GO:0048705|GO:0048008|GO:0005575
A_51_P120688	4.660199	P	2.1146636	A	5.83824761289147	NA		Mus musculus 15 days embryo head cDNA	 RIKEN full-length enriched library	 clone:D930046J11 product:unclassifiable	 full insert sequence. [AK086706]			 42463920	chr8	 42463861	-	mm|8qA4	AK086706	chr8:42463920-42463861
A_51_P120717	11.3346615	P	12.400528	P	0.477685668860484	    16906	Lmnb1	Mus musculus lamin B1 (Lmnb1)	 mRNA [NM_010721]	lamin B1	Mm.4105	 56912930	chr18	 56912871	+	mm|18qD3	NM_010721	chr18:56912871-56912930	GO:0005882|GO:0016020|GO:0043274|GO:0005198|GO:0046330|GO:0005654|GO:0005634|GO:0005635|GO:0031662|GO:0008432|GO:0016363|GO:0005638	NM_010721
A_51_P120729	12.373866	P	12.448061	P	0.949871985985432	    69833	Polr2f	Mus musculus polymerase (RNA) II (DNA directed) polypeptide F (Polr2f)	 mRNA [NM_027231]	polymerase (RNA) II (DNA directed) polypeptide F	Mm.279861	 78975077	chr15	 78971859	+	mm|15qE1	NM_027231	chr15:78971859-78975077	GO:0008380|GO:0006368|GO:0030880|GO:0006367|GO:0006366|GO:0003899|GO:0005730|GO:0005634|GO:0003677|GO:0006351|GO:0005665|GO:0005654|GO:0006468	NM_027231
A_51_P120738	8.292963	P	9.027271	P	0.601106280971442	   140795	P2ry14	Mus musculus purinergic receptor P2Y	 G-protein coupled	 14 (P2ry14)	 transcript variant 1	 mRNA [NM_133200]	purinergic receptor P2Y	 G-protein coupled	 14	Mm.447969	 58919072	chr3	 58919013	-	mm|3qD	NM_133200	chr3:58919072-58919013	GO:0007165|GO:0006955|GO:0016020|GO:0007186|GO:0005886|GO:0045028|GO:0004930|GO:0004872|GO:0035589|GO:0016021|GO:0004871	NM_133200
A_51_P120775	3.6371546	A	2.3024821	A	2.52218220293093	   320104	B130065D12Rik	Mus musculus 9.5 days embryo parthenogenote cDNA	 RIKEN full-length enriched library	 clone:B130065D12 product:unclassifiable	 full insert sequence. [AK045318]	RIKEN cDNA B130065D12 gene		 42047071	chr19	 42047012	-	mm|19qC3	AK045318	chr19:42047071-42047012	GO:0008150|GO:0003674|GO:0005575
A_51_P120785	6.786684	P	7.060629	P	0.827054897734644	NA		melanoma antigen	 family A	 7	 pseudogene [Source:MGI Symbol;Acc:MGI:1333836] [ENSMUST00000101420]		Mm.377099	 73592958	chrX	 73592899	+	mm|XqA7.3	BC127031	chrX:73592899-73592958
A_51_P120823	5.4882336	P	4.5364666	P	1.93424024783119	   258552	Olfr868	Mus musculus olfactory receptor 868 (Olfr868)	 mRNA [NM_146559]	olfactory receptor 868	Mm.223084	 19905526	chr9	 19905467	+	mm|9qA3	NM_146559	chr9:19905467-19905526	GO:0007608|GO:0007165|GO:0004984|GO:0007186|GO:0004930|GO:0004872|GO:0016021|GO:0004871	NM_146559
A_51_P120830	5.4141073	P	5.5266333	P	0.924967127776885	    17384	Mmp10	Mus musculus matrix metallopeptidase 10 (Mmp10)	 mRNA [NM_019471]	matrix metallopeptidase 10	Mm.14126	  7510070	chr9	  7510011	+	mm|9qA1	NM_019471	chr9:7510011-7510070	GO:0005509|GO:0005578|GO:0005576|GO:0046872|GO:0031012|GO:0016787|GO:0008152|GO:0030574|GO:0006508|GO:0008233|GO:0008270|GO:0004222|GO:0008237	NM_019471
A_51_P120851	6.423893	P	6.538733	P	0.923484722783462	    69930	Zfp715	Mus musculus zinc finger protein 715 (Zfp715)	 mRNA [NM_027264]	zinc finger protein 715	Mm.45367	 50554349	chr7	 50554290	-	mm|7qB4	NM_027264	chr7:50554349-50554290	GO:0008150|GO:0003674|GO:0046872	NM_027264
A_51_P120859	15.37742	P	15.364818	P	1.00877330256301	    17775	Laptm4a	Mus musculus lysosomal-associated protein transmembrane 4A (Laptm4a)	 mRNA [NM_008640]	lysosomal-associated protein transmembrane 4A	Mm.30071	  8945475	chr12	  8945416	+	mm|12qA1.1	NM_008640	chr12:8945416-8945475	GO:0005794|GO:0016021	NM_008640
A_51_P120875	9.579704	P	2.6037264	A	125.886310886777	   259036	Olfr713	Mus musculus olfactory receptor 713 (Olfr713)	 mRNA [NM_147034]	olfactory receptor 713	Mm.377801	114180569	chr7	114180510	+	mm|7qE3	NM_147034	chr7:114180510-114180569	GO:0007608|GO:0007165|GO:0004984|GO:0007186|GO:0004930|GO:0004872|GO:0016021|GO:0004871	NM_147034
A_51_P120917	8.831371	P	4.176711	P	25.1879185128880	    72413	Kcnmb2	Mus musculus potassium large conductance calcium-activated channel	 subfamily M	 beta member 2 (Kcnmb2)	 mRNA [NM_028231]	potassium large conductance calcium-activated channel	 subfamily M	 beta member 2	Mm.64790	 32098469	chr3	 32098410	+	mm|3qA3	NM_028231	chr3:32098410-32098469	GO:0005513|GO:0005267|GO:0019228|GO:0016020|GO:0005887|GO:0008076|GO:0006810|GO:0001508|GO:0016021|GO:0005216|GO:0006813|GO:0015269|GO:0071805|GO:0006811	NM_028231
A_51_P120948	11.607281	P	12.018932	P	0.751762574694187	    72584	Cul4b	Mus musculus cullin 4B (Cul4b)	 transcript variant 1	 mRNA [NM_028288]	cullin 4B	Mm.327675	 35886815	chrX	 35886756	-	mm|XqA3.3	NM_028288	chrX:35886815-35886756	GO:0031461|GO:0006511|GO:0003674|GO:0045732|GO:0007049|GO:0006281|GO:0045750|GO:0031465|GO:0005634|GO:0071445|GO:0031625|GO:0006974	NM_028288
A_51_P120975	4.872408	P	3.3016734	A	2.97055932321300	   257972	Olfr193	Mus musculus olfactory receptor 193 (Olfr193)	 mRNA [NM_001011791]	olfactory receptor 193	Mm.390897	 59109911	chr16	 59109853	-	mm|16qC1.3	NM_001011791	chr16:59109911-59109853	GO:0007608|GO:0007165|GO:0004984|GO:0007186|GO:0004930|GO:0004872|GO:0016021|GO:0004871	NM_001011791
A_51_P120990	8.322333	P	8.485676	P	0.89295352787421	   238871	Pde4d	Mus musculus phosphodiesterase 4D	 cAMP specific (Pde4d)	 mRNA [NM_011056]	phosphodiesterase 4D	 cAMP specific	Mm.434429	110743486	chr13	110743427	+	mm|13qD2.2	NM_011056	chr13:110743427-110743486	GO:0017124|GO:0005886|GO:0010738|GO:0003824|GO:0030016|GO:0043623|GO:0046872|GO:0005829|GO:0006939|GO:0005737|GO:0030552|GO:0005856|GO:0006198|GO:0005813|GO:0008081|GO:0005794|GO:0004115|GO:0004114|GO:0000267|GO:0004112|GO:0019904|GO:0007165|GO:0008277|GO:0016020|GO:0016787	NM_011056
A_51_P121031	10.113105	P	10.720268	P	0.656486386726692	    72925	1-Mar	Mus musculus membrane-associated ring finger (C3HC4) 1 (March1)	 transcript variant 3	 mRNA [NM_175188]	membrane-associated ring finger (C3HC4) 1	Mm.380457	 68994193	chr8	 68994134	+	mm|8qB3.2	NM_175188	chr8:68994134-68994193	GO:0000209|GO:0042287|GO:0004842|GO:0005794|GO:0002495|GO:0016874|GO:0031410|GO:0005764|GO:0046872|GO:0006955|GO:0016020|GO:0008270|GO:0016021|GO:0005768	NM_175188
A_51_P121058	11.269856	P	11.849649	P	0.669059768183074	    22051	Trip6	Mus musculus thyroid hormone receptor interactor 6 (Trip6)	 mRNA [NM_011639]	thyroid hormone receptor interactor 6	Mm.27063	137751310	chr5	137751251	-	mm|5qG2	NM_011639	chr5:137751310-137751251	GO:0005149|GO:0006355|GO:0030335|GO:0030054|GO:0005634|GO:0046872|GO:0006351|GO:0042802|GO:0005737|GO:0008588|GO:0004872|GO:0008270|GO:0005856|GO:0007155|GO:0019900|GO:0005925	NM_011639
A_51_P121086	2.247876	A	2.2261217	A	1.01519319238808	    22297	Vmn1r45	Mus musculus vomeronasal 1 receptor 45 (Vmn1r45)	 mRNA [NM_011684]	vomeronasal 1 receptor 45	Mm.431981	 89881841	chr6	 89881782	-	mm|6qD1	NM_011684	chr6:89881841-89881782	GO:0007165|GO:0016503|GO:0016020|GO:0007186|GO:0005886|GO:0004930|GO:0004872|GO:0016021|GO:0004871|GO:0019236	NM_011684
A_51_P121101	2.8175373	A	3.5139604	A	0.61710029954862	NA		Mus musculus adult male corpora quadrigemina cDNA	 RIKEN full-length enriched library	 clone:B230323P10 product:Rattus norvegicus protein kinase C	 zeta gene	 exon 1a	 alternatively spliced	 full insert sequence. [AK045928]			154721156	chr4	154721097	+	mm|4qE2	AK045928	chr4:154721097-154721156
A_51_P121134	11.5876255	P	12.034496	P	0.73363252186137	   330355	Dnahc6	Mus musculus dynein	 axonemal	 heavy chain 6 (Dnahc6)	 mRNA [NM_001164669]	dynein	 axonemal	 heavy chain 6	Mm.333166	 72972433	chr6	 72972374	-	mm|6qC1	NM_001164669	chr6:72972433-72972374	GO:0008150|GO:0003674|GO:0000166|GO:0005575|GO:0005524	NM_001164669
A_51_P121179	4.2978773	P	4.715437	P	0.748689953243422	   227358	Fam132b	Mus musculus family with sequence similarity 132	 member B (Fam132b)	 mRNA [NM_173395]	family with sequence similarity 132	 member B	Mm.389157	 93270527	chr1	 93270468	+	mm|1qD	NM_173395	chr1:93270468-93270527	GO:0008150|GO:0003674|GO:0005576|GO:0005575	NM_173395
A_51_P121198	6.0201645	P	6.5425167	P	0.696235750032835	    56795	Arl10	Mus musculus ADP-ribosylation factor-like 10 (Arl10)	 mRNA [NM_019968]	ADP-ribosylation factor-like 10	Mm.89484	 54682407	chr13	 54682348	+	mm|13qB1	NM_019968	chr13:54682348-54682407	GO:0008150|GO:0003674|GO:0000166|GO:0005575|GO:0005525	NM_019968
A_51_P121206	9.723021	P	10.703356	P	0.506862030683438	    24136	Zeb2	Mus musculus zinc finger E-box binding homeobox 2 (Zeb2)	 transcript variant 2	 mRNA [NM_015753]	zinc finger E-box binding homeobox 2	Mm.440702	 44844127	chr2	 44844068	-	mm|2qB	NM_015753	chr2:44844127-44844068	GO:0021846|GO:0001756|GO:0001755|GO:0005730|GO:0001843|GO:0030177|GO:0005634|GO:0007417|GO:0048598|GO:0003677|GO:0021766|GO:0005737|GO:0043507	NM_015753
A_51_P121228	12.891217	P	13.038325	P	0.903058904726147	    75452	Ascc2	Mus musculus activating signal cointegrator 1 complex subunit 2 (Ascc2)	 mRNA [NM_029291]	activating signal cointegrator 1 complex subunit 2	Mm.439906	  4583307	chr11	  4583248	+	mm|11qA1	NM_029291	chr11:4583248-4583307	GO:0008150|GO:0003674|GO:0006355|GO:0005575|GO:0006351	NM_029291
A_51_P121236	7.0007653	P	7.747239	P	0.59605869184387	    57913	Lrdd	Mus musculus leucine-rich and death domain containing (Lrdd)	 mRNA [NM_022654]	leucine-rich and death domain containing	Mm.334321	148624500	chr7	148624441	-	mm|7qF5	NM_022654	chr7:148624500-148624441	GO:0005515|GO:0007165|GO:0005737|GO:0006915|GO:0005634	NM_022654
A_51_P121252	8.366522	P	8.438237	P	0.951506224916122	   101861	Ints4	Mus musculus integrator complex subunit 4 (Ints4)	 mRNA [NM_027256]	integrator complex subunit 4	Mm.27383	104679300	chr7	104678920	+	mm|7qE1	NM_027256	chr7:104678920-104679300	GO:0003674|GO:0005488|GO:0032039|GO:0005634|GO:0016180	NM_027256
A_51_P121266	11.388528	P	6.2832546	P	34.4223431322504	    58869	Pex5l	Mus musculus peroxisomal biogenesis factor 5-like (Pex5l)	 transcript variant 1	 mRNA [NM_021483]	peroxisomal biogenesis factor 5-like	Mm.151332	 32849641	chr3	 32849582	-	mm|3qA3	NM_021483	chr3:32849641-32849582	GO:0005515|GO:0048471|GO:0017137|GO:0005221|GO:0045185|GO:0030425|GO:0005829|GO:0045055|GO:0051286|GO:0005737|GO:0016020|GO:0043949|GO:0005488|GO:0005052|GO:0042391|GO:0051461|GO:0016558|GO:0005778|GO:0017071	NM_021483
A_51_P121275	9.75264	P	10.07845	P	0.797850308151642	    52504	Cenpo	Mus musculus centromere protein O (Cenpo)	 mRNA [NM_134046]	centromere protein O	Mm.485081	  4213567	chr12	  4213508	-	mm|12qA1.1	NM_134046	chr12:4213567-4213508	GO:0008150|GO:0003674|GO:0007059|GO:0005694|GO:0000776|GO:0005634|GO:0005575|GO:0000775|GO:0051301	NM_134046
A_51_P121288	8.199452	P	8.006358	P	1.14321281997329	    59030	Mkks	Mus musculus McKusick-Kaufman syndrome protein (Mkks)	 transcript variant 1	 mRNA [NM_021527]	McKusick-Kaufman syndrome protein	Mm.272570	136700006	chr2	136699947	-	mm|2qF3	NM_021527	chr2:136700006-136699947	GO:0007608|GO:0021987|GO:0007286|GO:0035058|GO:0045494|GO:0005524|GO:0048854|GO:0005622|GO:0021756|GO:0021766|GO:0000166|GO:0050910|GO:0035176|GO:0009296	NM_021527
A_51_P121302	7.491784	P	7.330344	P	1.11840289479447	    75778	Them4	Mus musculus thioesterase superfamily member 4 (Them4)	 mRNA [NM_029431]	thioesterase superfamily member 4	Mm.45092	 94135782	chr3	 94135723	+	mm|3qF2.1	NM_029431	chr3:94135723-94135782	GO:0005739|GO:0005737|GO:0016020|GO:0005886|GO:0044419|GO:0042995|GO:0043231	NM_029431
A_51_P121325	9.884586	P	9.919874	P	0.975836938527725	    64658	Mrps25	Mus musculus mitochondrial ribosomal protein S25 (Mrps25)	 nuclear gene encoding mitochondrial protein	 mRNA [NM_025578]	mitochondrial ribosomal protein S25	Mm.476867	 92124183	chr6	 92124124	-	mm|6qD1	NM_025578	chr6:92124183-92124124	GO:0005739|GO:0008150|GO:0003735|GO:0030529|GO:0005840|GO:0005763	NM_025578
A_51_P121335	2.1822999	A	2.1865535	A	0.9970559713296	    77817	A930018O16Rik	Mus musculus adult retina cDNA	 RIKEN full-length enriched library	 clone:A930018O16 product:unclassifiable	 full insert sequence. [AK020873]	RIKEN cDNA A930018O16 gene		 69674735	chr13	 69674676	+	mm|13qC1	AK020873	chr13:069674676-069674735	GO:0008150|GO:0003674|GO:0005575
A_51_P121359	11.763881	P	11.761407	P	1.00171631731416	    76014	Zc3h18	Mus musculus zinc finger CCCH-type containing 18 (Zc3h18)	 transcript variant 1	 mRNA [NM_001029993]	zinc finger CCCH-type containing 18	Mm.241489	124940541	chr8	124940482	+	mm|8qE1	NM_001029993	chr8:124940482-124940541	GO:0008150|GO:0003674|GO:0008270|GO:0005634|GO:0005575|GO:0003676|GO:0046872	NM_001029993
A_51_P121390	14.036958	P	13.981702	P	1.03904346071206	    66156	Anapc11	Mus musculus anaphase promoting complex subunit 11 (Anapc11)	 transcript variant 1	 mRNA [NM_001038230]	anaphase promoting complex subunit 11	Mm.21645	120466967	chr11	120466908	+	mm|11qE2	NM_001038230	chr11:120466908-120466967	GO:0016567|GO:0051437|GO:0005634|GO:0051436|GO:0031145|GO:0046872|GO:0005829|GO:0003674|GO:0005737|GO:0007049|GO:0007067|GO:0070979|GO:0005680|GO:0005654|GO:0008270|GO:0051301	NM_001038230
A_51_P121397	9.134996	P	9.484411	P	0.78490230427671	    66258	Mrps17	Mus musculus mitochondrial ribosomal protein S17 (Mrps17)	 nuclear gene encoding mitochondrial protein	 mRNA [NM_025450]	mitochondrial ribosomal protein S17	Mm.249809	130221791	chr5	130221732	+	mm|5qG1.3	NM_025450	chr5:130221732-130221791	GO:0005739|GO:0005622|GO:0008150|GO:0003674|GO:0003735|GO:0030529|GO:0003723|GO:0005840|GO:0019843|GO:0006412	NM_025450
A_51_P121412	9.740421	P	10.050653	P	0.806512053472424	    67843	Slc35a4	Mus musculus solute carrier family 35	 member A4 (Slc35a4)	 transcript variant 1	 mRNA [NM_026404]	solute carrier family 35	 member A4	Mm.273350	 36842991	chr18	 36842932	+	mm|18qB2	NM_026404	chr18:36842932-36842991	GO:0008150|GO:0003674|GO:0005794|GO:0016020|GO:0000139|GO:0006810|GO:0008643|GO:0005351|GO:0016021|GO:0005575	NM_026404
A_51_P121432	10.807175	P	10.0246315	P	1.72016087889143	    66306	Fam53c	Mus musculus family with sequence similarity 53	 member C (Fam53c)	 mRNA [NM_175104]	family with sequence similarity 53	 member C	Mm.29424	 34932954	chr18	 34932895	+	mm|18qB1	NM_175104	chr18:34932895-34932954	GO:0008150|GO:0003674|GO:0005575	NM_175104
A_51_P121447	13.331298	P	13.444765	P	0.924364013295746	   117171	1110038F14Rik	Mus musculus RIKEN cDNA 1110038F14 gene (1110038F14Rik)	 mRNA [NM_054099]	RIKEN cDNA 1110038F14 gene	Mm.322968	 76781074	chr15	 76781015	+	mm|15qD3	NM_054099	chr15:76781015-76781074	GO:0008150|GO:0003674|GO:0005575	NM_054099
A_51_P121455	9.185921	P	8.563174	P	1.53980429510925	    68066	Slc25a39	Mus musculus solute carrier family 25	 member 39 (Slc25a39)	 mRNA [NM_026542]	solute carrier family 25	 member 39	Mm.44226	102267022	chr11	102266350	-	mm|11qD	NM_026542	chr11:102267022-102266350	GO:0005739|GO:0016020|GO:0006810|GO:0005743|GO:0016021|GO:0006783	NM_026542
A_51_P121466	12.646952	P	12.726684	P	0.94623340597696	    66513	Tab1	Mus musculus TGF-beta activated kinase 1/MAP3K7 binding protein 1 (Tab1)	 mRNA [NM_025609]	TGF-beta activated kinase 1/MAP3K7 binding protein 1	Mm.288245	 79992098	chr15	 79992039	+	mm|15qE1	NM_025609	chr15:79992039-79992098	GO:0005515|GO:0030324|GO:0003824|GO:0001701|GO:0005829|GO:0002756|GO:0003007|GO:0019209|GO:0000185|GO:0002755|GO:0007179|GO:0010008|GO:0042327	NM_025609
A_51_P121477	2.7883914	A	2.326187	A	1.37764521634449	   240034	Zfp760	Mus musculus NOD-derived CD11c +ve dendritic cells cDNA	 RIKEN full-length enriched library	 clone:F630040N04 product:hypothetical protein	 full insert sequence. [AK154502]	zinc finger protein 760		 21847599	chr17	 21847540	+	mm|17qA3.2	AK154502	chr17:21847540-21847599	GO:0008150|GO:0003674|GO:0005575|GO:0046872
A_51_P121485	5.958905	P	5.6286907	P	1.25720010696799	   258618	Olfr355	Mus musculus olfactory receptor 355 (Olfr355)	 mRNA [NM_146625]	olfactory receptor 355	Mm.377596	 36783571	chr2	 36783512	-	mm|2qB	NM_146625	chr2:36783571-36783512	GO:0007608|GO:0007165|GO:0004984|GO:0007186|GO:0004930|GO:0004872|GO:0016021|GO:0004871	NM_146625
A_51_P121506	6.385753	P	6.4464793	P	0.95878131584613	    11907	Ate1	Mus musculus arginyltransferase 1 (Ate1)	 transcript variant 4	 mRNA [NM_001136054]	arginyltransferase 1	Mm.216321	137651034	chr7	137647344	-	mm|7qF3	NM_001136054	chr7:137651034-137647344	GO:0005737|GO:0004057|GO:0005634|GO:0016598|GO:0016740|GO:0008415	NM_001136054
A_51_P121527	8.2396755	P	8.160365	P	1.05651298593316	    68338	Golt1a	Mus musculus golgi transport 1 homolog A (S. cerevisiae) (Golt1a)	 mRNA [NM_026680]	golgi transport 1 homolog A (S. cerevisiae)	Mm.247935	135218364	chr1	135218305	+	mm|1qE4	NM_026680	chr1:135218305-135218364	GO:0008150|GO:0003674|GO:0005794|GO:0016020|GO:0006810|GO:0016021|GO:0005575|GO:0016192|GO:0015031	NM_026680
A_51_P121547	8.047873	P	8.429799	P	0.76741240979231	    12151	Bmi1	Mus musculus Bmi1 polycomb ring finger oncogene (Bmi1)	 mRNA [NM_007552]	Bmi1 polycomb ring finger oncogene	Mm.289584	 18605365	chr2	 18605306	+	mm|2qA3	NM_007552	chr2:18605306-18605365	GO:0005515|GO:0010468|GO:0048103|GO:0004842|GO:0030890|GO:0048706|GO:0000151|GO:0048704|GO:0005634|GO:0048146|GO:0046872|GO:0005737|GO:0006959|GO:0051443|GO:0071535|GO:0021903|GO:0031519|GO:0043066|GO:0006355|GO:0016573|GO:0009987|GO:0016574|GO:0005730|GO:0000122|GO:0001701|GO:0006351|GO:0033092|GO:0016604|GO:0001501|GO:0007420|GO:0003682|GO:0008270|GO:0016568	NM_007552
A_51_P121607	3.3589985	A	4.406711	P	0.483734553734556	    78931	4930546C10Rik	Mus musculus RIKEN cDNA 4930546C10 gene (4930546C10Rik)	 non-coding RNA [NR_038051]	RIKEN cDNA 4930546C10 gene	Mm.160155	 69109851	chr18	 69109792	-	mm|18qE2	NR_038051	chr18:69109851-69109792	GO:0008150|GO:0003674|GO:0005575	NR_038051
A_51_P121622	14.552254	P	14.402089	P	1.10969637999184	    68817	Ddi2	DNA-damage inducible protein 2 [Source:MGI Symbol;Acc:MGI:1917244] [ENSMUST00000102484]	DNA-damage inducible protein 2	Mm.441022	141233673	chr4	141233614	-	mm|4qE1	AK004273	chr4:141233673-141233614	GO:0008150|GO:0003674|GO:0006508|GO:0005575|GO:0004190
A_51_P121635	11.475498	P	11.220275	P	1.19352021336749	    80884	Maged2	Mus musculus melanoma antigen	 family D	 2 (Maged2)	 transcript variant 1	 mRNA [NM_030700]	melanoma antigen	 family D	 2	Mm.22575	147241637	chrX	147241578	-	mm|XqF3	NM_030700	chrX:147241637-147241578	GO:0008150|GO:0003674|GO:0005575	NM_030700
A_51_P121652	10.120168	P	10.242249	P	0.918861292635522	    68938	Aspscr1	Mus musculus alveolar soft part sarcoma chromosome region	 candidate 1 (human) (Aspscr1)	 transcript variant 1	 mRNA [NM_026877]	alveolar soft part sarcoma chromosome region	 candidate 1 (human)	Mm.294020	120564974	chr11	120563863	+	mm|11qE2	NM_026877	chr11:120563863-120564974	GO:0012506|GO:0005515|GO:0005792|GO:0048471|GO:0046324|GO:0016020|GO:0009898|GO:0042593|GO:0006886|GO:0019898|GO:0005829|GO:0000300	NM_026877
A_51_P121724	6.2151966	P	5.927363	P	1.22080569719679	    71011	4933401B06Rik	Mus musculus RIKEN cDNA 4933401B06 gene (4933401B06Rik)	 non-coding RNA [NR_033580]	GLE1 RNA export mediator pseudogene	Mm.307348	104739041	chrX	104738982	+	mm|XqD	NR_033580	chrX:104738982-104739041		NR_033580
A_51_P121756	5.1435447	P	5.5014467	P	0.78029848281944	NA		Mus musculus adult male testis cDNA	 RIKEN full-length enriched library	 clone:4933417J23 product:unclassifiable	 full insert sequence. [AK016846]			 96478334	chr13	 96478275	+	mm|13qD1	AK016846	chr13:96478275-96478334
A_51_P121793	11.7374325	P	11.559298	P	1.13141993828184	    18949	Pnn	Mus musculus pinin (Pnn)	 mRNA [NM_008891]	pinin	Mm.22347	 60173715	chr12	 60173656	+	mm|12qC1	NM_008891	chr12:60173656-60173715	GO:0006397|GO:0008380|GO:0030057|GO:0006355|GO:0030054|GO:0005634|GO:0071013|GO:0003677|GO:0006351|GO:0005737|GO:0016337|GO:0016607|GO:0005681	NM_008891
A_51_P121818	11.931239	P	12.046234	P	0.923385510934166	    19082	Prkag1	Mus musculus protein kinase	 AMP-activated	 gamma 1 non-catalytic subunit (Prkag1)	 mRNA [NM_016781]	protein kinase	 AMP-activated	 gamma 1 non-catalytic subunit	Mm.6670	 98643461	chr15	 98643402	-	mm|15qF1	NM_016781	chr15:98643461-98643402	GO:0008610|GO:0004679|GO:0016208|GO:0019901|GO:0031588|GO:0006950|GO:0005634|GO:0046320|GO:0003824|GO:0051291|GO:0005829|GO:0043234|GO:0050790|GO:0008152|GO:0006633	NM_016781
A_51_P121829	10.76328	P	10.687623	P	1.05384084338869	    19158	Cyth2	Mus musculus cytohesin 2 (Cyth2)	 transcript variant 1	 mRNA [NM_011181]	cytohesin 2	Mm.272130	 53063440	chr7	 53063381	-	mm|7qB4	NM_011181	chr7:53063440-53063381	GO:0005622|GO:0005515|GO:0005085|GO:0005086|GO:0050790|GO:0005737|GO:0016020|GO:0005886|GO:0032012|GO:0030155	NM_011181
A_51_P121891	13.594667	P	13.669799	P	0.949255264460549	    19354	Rac2	Mus musculus RAS-related C3 botulinum substrate 2 (Rac2)	 mRNA [NM_009008]	RAS-related C3 botulinum substrate 2	Mm.1972	 78391511	chr15	 78391452	-	mm|15qE1	NM_009008	chr15:78391511-78391452	GO:0008284|GO:0030036|GO:0007264|GO:0045453|GO:0003924|GO:0060263|GO:0005624|GO:0005635|GO:0005525|GO:0005829|GO:0005622|GO:0006184|GO:0005737|GO:0000166|GO:0006935|GO:0016020|GO:0030031	NM_009008
A_51_P121900	11.128439	P	11.07403	P	1.03843362183811	   212139	Cc2d1a	Mus musculus coiled-coil and C2 domain containing 1A (Cc2d1a)	 mRNA [NM_145970]	coiled-coil and C2 domain containing 1A	Mm.41424	 86656966	chr8	 86656907	-	mm|8qC3	NM_145970	chr8:86656966-86656907	GO:0007165|GO:0006355|GO:0005737|GO:0005886|GO:0005730|GO:0005634|GO:0004871|GO:0043123|GO:0003677|GO:0006351	NM_145970
A_51_P121915	2.1436143	A	3.1949916	A	0.482507308484476	   216454	BC089597	Mus musculus cDNA sequence BC089597 (BC089597)	 mRNA [NM_145424]	cDNA sequence BC089597	Mm.214923	127314340	chr10	127314281	+	mm|10qD3	NM_145424	chr10:127314281-127314340	GO:0008150|GO:0003674|GO:0016491|GO:0005575|GO:0055114	NM_145424
A_51_P121947	12.100041	P	12.250534	P	0.90094253851193	    20184	Uimc1	Mus musculus ubiquitin interaction motif containing 1 (Uimc1)	 mRNA [NM_011307]	ubiquitin interaction motif containing 1	Mm.259301	 55129278	chr13	 55129241	-	mm|13qB1	NM_011307	chr13:55129278-55129241	GO:0006355|GO:0031572|GO:0005634|GO:0045739|GO:0006351|GO:0006974|GO:0006302|GO:0070531|GO:0042393|GO:0046965|GO:0006281|GO:0010212|GO:0070537|GO:0045892|GO:0070530|GO:0016568	NM_011307
A_51_P121962	3.8019478	P	3.552909	A	1.18841506599338	   319387	Lphn3	Mus musculus 12 days embryo spinal ganglion cDNA	 RIKEN full-length enriched library	 clone:D130075K09 product:CALCIUM-INDEPENDENT ALPHA-LATROTOXIN RECEPTOR 3 PRECURSOR (LATROPHILIN 3) (LRP3) (CIRL) (CL3) (LPH3) homolog [Rattus norvegicus]	 full insert sequence. [AK051766]	latrophilin 3	Mm.273631	 82221766	chr5	 82221707	+	mm|5qE1	AK051766	chr5:82221707-82221766	GO:0005886|GO:0004930|GO:0005529|GO:0005575|GO:0003674|GO:0007165|GO:0008150|GO:0016020|GO:0007186|GO:0007218|GO:0004872|GO:0016021|GO:0004871|GO:0007166|GO:0004888
A_51_P122017	12.3439455	P	12.688814	P	0.787379742059826	   216850	Kdm6b	Mus musculus KDM1 lysine (K)-specific demethylase 6B (Kdm6b)	 mRNA [NM_001017426]	KDM1 lysine (K)-specific demethylase 6B	Mm.261201	 69213698	chr11	 69213554	-	mm|11qB3	NM_001017426	chr11:69213698-69213554	GO:0043565|GO:0016577|GO:0006954|GO:0005488|GO:0016491|GO:0005634|GO:0000122|GO:0016702|GO:0046872|GO:0055114|GO:0016568	NM_001017426
A_51_P122030	4.765996	P	5.177282	P	0.75195279372558	    27216	Olfr154	Mus musculus olfactory receptor 154 (Olfr154)	 mRNA [NM_013728]	olfactory receptor 154	Mm.377120	 85504463	chr2	 85504404	-	mm|2qD	NM_013728	chr2:85504463-85504404	GO:0007608|GO:0007165|GO:0004984|GO:0007186|GO:0004930|GO:0004872|GO:0016021|GO:0004871	NM_013728
A_51_P122033	2.4857523	A	2.2875993	A	1.14722868311905	    27216	Olfr154	Mus musculus olfactory receptor 154 (Olfr154)	 mRNA [NM_013728]	olfactory receptor 154	Mm.377120	 85503770	chr2	 85503711	-	mm|2qD	NM_013728	chr2:85503770-85503711	GO:0007608|GO:0007165|GO:0004984|GO:0007186|GO:0004930|GO:0004872|GO:0016021|GO:0004871	NM_013728
A_51_P122035	11.535482	P	11.009792	P	1.4396219456108	   233280	Nipa1	Mus musculus non imprinted in Prader-Willi/Angelman syndrome 1 homolog (human) (Nipa1)	 mRNA [NM_153578]	non imprinted in Prader-Willi/Angelman syndrome 1 homolog (human)	Mm.389901	 63233936	chr7	 63233877	-	mm|7qB5	NM_153578	chr7:63233936-63233877	GO:0015693|GO:0016020|GO:0005886|GO:0006810|GO:0016021|GO:0005769|GO:0006811|GO:0005768	NM_153578
A_51_P122055	3.2983046	A	4.5185475	P	0.42921044792486	    27762	D17H6S56E-3	Mus musculus DNA segment	 Chr 17	 human D6S56E 3 (D17H6S56E-3)	 mRNA [NM_138582]	DNA segment	 Chr 17	 human D6S56E 3	Mm.56895	 35163669	chr17	 35163610	+	mm|17qB1	NM_138582	chr17:35163610-35163669	GO:0005576	NM_138582
A_51_P122071	15.793529	P	15.611231	P	1.13468983983606	    74180	Muc5b	Mus musculus mucin 5	 subtype B	 tracheobronchial (Muc5b)	 mRNA [NM_028801]	mucin 5	 subtype B	 tracheobronchial	Mm.200752	149058794	chr7	149058735	+	mm|7qF5	NM_028801	chr7:149058735-149058794	GO:0008150|GO:0003674|GO:0005575	NM_028801
A_51_P122075	7.1422925	P	7.8745184	P	0.601974424907595	NA		Mus musculus 0 day neonate kidney cDNA	 RIKEN full-length enriched library	 clone:D630004B07 product:DOCK180 PROTEIN homolog [Homo sapiens]	 full insert sequence. [AK052606]		Mm.436572	142068262	chr7	142068203	+	mm|7qF3	AK052606	chr7:142068203-142068262
A_51_P122085	12.845303	P	12.431711	P	1.33199807737121	    74270	Usp20	Mus musculus ubiquitin specific peptidase 20 (Usp20)	 mRNA [NM_028846]	ubiquitin specific peptidase 20	Mm.346654	 30878160	chr2	 30878101	+	mm|2qB	NM_028846	chr2:30878101-30878160	GO:0071108|GO:0006511|GO:0016579|GO:0001664|GO:0005575|GO:0046872|GO:0006897|GO:0004197|GO:0005737|GO:0008277|GO:0070536|GO:0016787|GO:0008233|GO:0008270|GO:0004221|GO:0008234	NM_028846
A_51_P122100	2.1077528	A	2.0915143	A	1.01131925388461	    74328	1700047E10Rik	Mus musculus adult male testis cDNA	 RIKEN full-length enriched library	 clone:1700047E10 product:RIKEN cDNA 1700047E10 gene	 full insert sequence. [AK006704]	RIKEN cDNA 1700047E10 gene	Mm.439150	 44769332	chr14	 44769273	-	mm|14qC1	AK006704	chr14:44769332-44769273	GO:0008150|GO:0003674|GO:0005575
A_51_P122116	6.228641	P	2.1337745	A	17.0874652644680	   258882	Olfr874	Mus musculus olfactory receptor 874 (Olfr874)	 mRNA [NM_146882]	olfactory receptor 874	Mm.223176	 37554627	chr9	 37554568	+	mm|9qA4	NM_146882	chr9:37554568-37554627	GO:0007608|GO:0007165|GO:0004984|GO:0007186|GO:0004930|GO:0004872|GO:0016021|GO:0004871	NM_146882
A_51_P122141	5.384701	P	5.650824	P	0.831551199706185	    74490	Mamstr	Mus musculus MEF2 activating motif and SAP domain containing transcriptional regulator (Mamstr)	 mRNA [NM_172418]	MEF2 activating motif and SAP domain containing transcriptional regulator	Mm.107442	 52900764	chr7	 52900705	+	mm|7qB4	NM_172418	chr7:52900705-52900764	GO:0001076|GO:0006366|GO:0045944|GO:0010831|GO:0005634	NM_172418
A_51_P122157	12.591517	P	12.715534	P	0.91762906936362	   330577	Fam154b	Mus musculus family with sequence similarity 154	 member B (Fam154b)	 mRNA [NM_177894]	family with sequence similarity 154	 member B	Mm.222812	 89781863	chr7	 89781804	-	mm|7qD3	NM_177894	chr7:89781863-89781804	GO:0008150|GO:0003674|GO:0005575	NM_177894
A_51_P122170	4.6345367	P	4.625218	P	1.00648013644925	    54150	Rdh7	Mus musculus retinol dehydrogenase 7 (Rdh7)	 transcript variant 2	 mRNA [NM_017473]	retinol dehydrogenase 7	Mm.6696	127321321	chr10	127321262	-	mm|10qD3	NM_017473	chr10:127321321-127321262	GO:0005792|GO:0005783|GO:0005488|GO:0008152|GO:0016491|GO:0004745|GO:0003824|GO:0055114	NM_017473
A_51_P122180	7.8043065	P	8.316347	P	0.701229939794886	    98403	Zfp451	Mus musculus zinc finger protein 451	 mRNA (cDNA clone MGC:28438 IMAGE:4038791)	 complete cds. [BC019546]	zinc finger protein 451	Mm.289103	 33859230	chr1	 33859171	-	mm|1qB	BC019546	chr1:33859230-33859171	GO:0005622|GO:0008150|GO:0003674|GO:0006355|GO:0008270|GO:0005634|GO:0005575|GO:0003677|GO:0046872|GO:0006351
A_51_P122217	9.102383	P	9.276397	P	0.886373097734942	   193385	Fam65b	Mus musculus family with sequence similarity 65	 member B (Fam65b)	 transcript variant 1	 mRNA [NM_029679]	family with sequence similarity 65	 member B	Mm.217319	 24823862	chr13	 24823803	+	mm|13qA3.1	NM_029679	chr13:24823803-24823862	GO:0008150|GO:0003674|GO:0005488|GO:0005575	NM_029679
A_51_P122226	8.11938	P	7.8626328	P	1.19478182775214	    66606	Lrrc57	Mus musculus leucine rich repeat containing 57 (Lrrc57)	 transcript variant 3	 mRNA [NM_025657]	leucine rich repeat containing 57	Mm.428639	120430549	chr2	120430490	-	mm|2qE5	NM_025657	chr2:120430549-120430490	GO:0008150|GO:0003674|GO:0005575	NM_025657
A_51_P122238	12.171614	P	12.325916	P	0.898567009487267	    56207	Uchl5	Mus musculus ubiquitin carboxyl-terminal esterase L5 (Uchl5)	 transcript variant 1	 mRNA [NM_019562]	ubiquitin carboxyl-terminal esterase L5	Mm.261004	145653903	chr1	145653844	+	mm|1qF	NM_019562	chr1:145653844-145653903	GO:0006511|GO:0016579|GO:0004843|GO:0004866|GO:0005634|GO:0005829|GO:0005622|GO:0005737|GO:0008242|GO:0006355|GO:0000502|GO:0006310|GO:0006351|GO:0006974|GO:0048853|GO:0010951|GO:0031011|GO:0006281|GO:0016787|GO:0021670|GO:0061136|GO:0070628|GO:0008233|GO:0030901|GO:0004221|GO:0008234	NM_019562
A_51_P122246	15.806316	P	16.209482	P	0.756196983772002	    76737	Creld2	Mus musculus cysteine-rich with EGF-like domains 2 (Creld2)	 mRNA [NM_029720]	cysteine-rich with EGF-like domains 2	Mm.292567	 88657056	chr15	 88656997	+	mm|15qE3	NM_029720	chr15:88656997-88657056	GO:0008150|GO:0003674|GO:0005783|GO:0005509|GO:0005576|GO:0005575	NM_029720
A_51_P122268	7.9241095	P	8.659874	P	0.600499729013027	    56386	B4galt6	Mus musculus UDP-Gal:betaGlcNAc beta 1	4-galactosyltransferase	 polypeptide 6 (B4galt6)	 mRNA [NM_019737]	UDP-Gal:betaGlcNAc beta 1	4-galactosyltransferase	 polypeptide 6	Mm.393827	 20844816	chr18	 20844757	-	mm|18qA2	NM_019737	chr18:20844816-20844757	GO:0005794|GO:0016020|GO:0016757|GO:0005975|GO:0030148|GO:0008489|GO:0008152|GO:0016021|GO:0005575|GO:0008378|GO:0046872|GO:0016740	NM_019737
A_51_P122290	12.558164	P	12.587525	P	0.979854199536996	   228880	Zmynd8	Mus musculus zinc finger	 MYND-type containing 8 (Zmynd8)	 mRNA [NM_027230]	zinc finger	 MYND-type containing 8	Mm.227598	165610068	chr2	165610009	-	mm|2qH3	NM_027230	chr2:165610068-165610009	GO:0016310|GO:0008150|GO:0003674|GO:0016301|GO:0005575|GO:0046872	NM_027230
A_51_P122308	1.9888048	A	2.0204523	A	0.978302477178072	NA		Mus musculus 0 day neonate cerebellum cDNA	 RIKEN full-length enriched library	 clone:C230043C08 product:unclassifiable	 full insert sequence. [AK082378]			144940472	chr4	144940413	-	mm|4qE1	AK082378	chr4:144940472-144940413
A_51_P122321	13.240457	P	12.357574	P	1.84405668004643	    77125	Il33	Mus musculus interleukin 33 (Il33)	 transcript variant 2	 mRNA [NM_133775]	interleukin 33	Mm.182359	 30035049	chr19	 30034990	+	mm|19qC1	NM_133775	chr19:30034990-30035049	GO:0032755|GO:0032753|GO:0032754|GO:0043032|GO:0005576|GO:0005634|GO:0032736|GO:0005125|GO:0005615|GO:0051025|GO:0045944|GO:0002686|GO:0051024|GO:0050729|GO:0002826|GO:0002830|GO:0032689|GO:0090197	NM_133775
A_51_P122352	2.9681668	A	3.4518158	A	0.715166468199384	   319468	Ppm1h	Mus musculus protein phosphatase 1H (PP2C domain containing) (Ppm1h)	 transcript variant 2	 mRNA [NM_176919]	protein phosphatase 1H (PP2C domain containing)	Mm.232916	122358088	chr10	122358029	+	mm|10qD2	NM_176919	chr10:122358029-122358088	GO:0008150|GO:0003674|GO:0016787|GO:0004721|GO:0005575|GO:0003824	NM_176919
A_51_P122356	11.420811	P	10.765471	P	1.57498708667607	    12581	Cdkn2d	Mus musculus cyclin-dependent kinase inhibitor 2D (p19	 inhibits CDK4) (Cdkn2d)	 mRNA [NM_009878]	cyclin-dependent kinase inhibitor 2D (p19	 inhibits CDK4)	Mm.29020	 21093039	chr9	 21092980	-	mm|9qA3	NM_009878	chr9:21093039-21092980	GO:0048102|GO:0030308|GO:0008285|GO:0019901|GO:0007605|GO:0033280|GO:0005634|GO:0006916|GO:0000079|GO:0042326|GO:0016310|GO:0000082|GO:0005737|GO:0016301|GO:0000731|GO:0004861|GO:0007050|GO:0032526|GO:0043154|GO:0009411	NM_009878
A_51_P122373	11.366302	P	11.378281	P	0.991731166362128	   234309	Cbr4	Mus musculus carbonyl reductase 4 (Cbr4)	 mRNA [NM_145595]	carbonyl reductase 4	Mm.29059	 63982048	chr8	 63981989	+	mm|8qB3.1	NM_145595	chr8:63981989-63982048	GO:0005739|GO:0008610|GO:0048038|GO:0051289|GO:0005488|GO:0005759|GO:0008152|GO:0016491|GO:0006633|GO:0070402|GO:0008753|GO:0055114	NM_145595
A_51_P122425	10.520255	P	10.413651	P	1.07669079877310	    13019	Ctf1	Mus musculus cardiotrophin 1 (Ctf1)	 mRNA [NM_007795]	cardiotrophin 1	Mm.389954	134861640	chr7	134861581	+	mm|7qF3	NM_007795	chr7:134861581-134861640	GO:0005146|GO:0048861|GO:0048666|GO:0005576|GO:0005615|GO:0005125|GO:0007399	NM_007795
A_51_P122452	5.9229655	P	3.697183	A	4.67764540351008	   258268	Olfr1511	Mus musculus olfactory receptor 1511 (Olfr1511)	 mRNA [NM_146271]	olfactory receptor 1511	Mm.377402	 53010161	chr14	 53010102	-	mm|14qC2	NM_146271	chr14:53010161-53010102	GO:0007608|GO:0004984|GO:0007186|GO:0016021	NM_146271
A_51_P122471	10.9251175	P	11.075023	P	0.90130949862033	   107652	Uap1	Mus musculus UDP-N-acetylglucosamine pyrophosphorylase 1 (Uap1)	 mRNA [NM_133806]	UDP-N-acetylglucosamine pyrophosphorylase 1	Mm.27969	172072657	chr1	172072598	-	mm|1qH3	NM_133806	chr1:172072657-172072598	GO:0005737|GO:0003977|GO:0005886|GO:0008152|GO:0016779|GO:0005529|GO:0005634|GO:0006047|GO:0006488|GO:0016740|GO:0005829	NM_133806
A_51_P122481	3.792917	P	4.810545	P	0.493927773951743	   619808	1700010L04Rik	Mus musculus adult male testis cDNA	 RIKEN full-length enriched library	 clone:1700010L04 product:hypothetical protein	 full insert sequence. [AK005840]	RIKEN cDNA 1700010L04 gene	Mm.443250	 90008311	chr7	 90008252	+	mm|7qD3	AK005840	chr7:90008252-90008311	GO:0008150|GO:0003674|GO:0005575
A_51_P122521	9.933979	P	9.962099	P	0.980697428477065	    18141	Nup50	Mus musculus nucleoporin 50 (Nup50)	 mRNA [NM_016714]	nucleoporin 50	Mm.28379	 84772575	chr15	 84772516	+	mm|15qE2	NM_016714	chr15:84772516-84772575	GO:0005515|GO:0046930|GO:0005487|GO:0005643|GO:0030529|GO:0015288|GO:0005654|GO:0055085|GO:0006913|GO:0001841	NM_016714
A_51_P122535	5.710927	P	2.184463	A	11.5231560330115	    13828	Epb4.2	Mus musculus erythrocyte protein band 4.2 (Epb4.2)	 mRNA [NM_013513]	erythrocyte protein band 4.2	Mm.240051	120844766	chr2	120844707	-	mm|2qE5	NM_013513	chr2:120844766-120844707	GO:0020027|GO:0005886|GO:0008360|GO:0050801|GO:0048536|GO:0055072|GO:0000902|GO:0005737|GO:0018149|GO:0043249|GO:0016020|GO:0003810|GO:0030863|GO:0005856	NM_013513
A_51_P122582	12.012821	P	11.99732	P	1.01080240359829	   231871	Daglb	Mus musculus diacylglycerol lipase	 beta (Daglb)	 mRNA [NM_144915]	diacylglycerol lipase	 beta	Mm.469963	144264990	chr5	144264931	+	mm|5qG2	NM_144915	chr5:144264931-144264990	GO:0016042|GO:0006629|GO:0004806|GO:0016787|GO:0016020|GO:0005886|GO:0016021|GO:0046872	NM_144915
A_51_P122614	3.5068305	A	4.499471	P	0.502557125016843	   217995	Heatr1	Mus musculus HEAT repeat containing 1 (Heatr1)	 mRNA [NM_144835]	HEAT repeat containing 1	Mm.171186	 12502751	chr13	 12502692	+	mm|13qA1	NM_144835	chr13:12502692-12502751	GO:0008150|GO:0003674|GO:0005575	NM_144835
A_51_P122631	6.932154	P	6.7843933	P	1.10784857364783	   170823	Glmn	Mus musculus glomulin	 FKBP associated protein (Glmn)	 transcript variant 1	 mRNA [NM_133248]	glomulin	 FKBP associated protein	Mm.41417	107991817	chr5	107991283	-	mm|5qE5	NM_133248	chr5:107991817-107991283	GO:0005515|GO:0008285|GO:0005102|GO:0005575|GO:0050715|GO:0042130|GO:0042692|GO:0045086|GO:0040029|GO:0005171|GO:0001570|GO:0007166|GO:0042327	NM_133248
A_51_P122649	7.2925324	P	7.7454457	P	0.730566091951628	    70059	Degs2	Mus musculus degenerative spermatocyte homolog 2 (Drosophila)	 lipid desaturase (Degs2)	 transcript variant 1	 mRNA [NM_027299]	degenerative spermatocyte homolog 2 (Drosophila)	 lipid desaturase	Mm.207605	109928560	chr12	109928501	-	mm|12qF1	NM_027299	chr12:109928560-109928501	GO:0006629|GO:0006667|GO:0008610|GO:0005783|GO:0030148|GO:0000170|GO:0016020|GO:0005789|GO:0016491|GO:0006633|GO:0016021|GO:0016705|GO:0046513|GO:0042284|GO:0055114	NM_027299
A_51_P122660	10.458571	P	9.315655	P	2.20826911552006	   239759	Liph	Mus musculus lipase	 member H (Liph)	 transcript variant 2	 mRNA [NM_153404]	lipase	 member H	Mm.33192	 21956062	chr16	 21956003	-	mm|16qB1	NM_153404	chr16:21956062-21956003	GO:0016042|GO:0006629|GO:0016787|GO:0016020|GO:0005886|GO:0005576|GO:0004620|GO:0003824|GO:0008201|GO:0005615	NM_153404
A_51_P122707	2.0384896	A	2.0069482	A	1.02210357544290	   434784	Ldoc1	Mus musculus leucine zipper	 down-regulated in cancer 1 (Ldoc1)	 mRNA [NM_001018087]	leucine zipper	 down-regulated in cancer 1	Mm.23468	 58963273	chrX	 58963214	+	mm|XqA6	NM_001018087	chrX:58963214-58963273	GO:0008150|GO:0003674|GO:0005634|GO:0005575	NM_001018087
A_51_P122723	13.870129	P	13.850026	P	1.01403187315916	    17713	Grpel1	Mus musculus GrpE-like 1	 mitochondrial (Grpel1)	 nuclear gene encoding mitochondrial protein	 mRNA [NM_024478]	GrpE-like 1	 mitochondrial	Mm.21535	 36814164	chr5	 36814105	+	mm|5qB3	NM_024478	chr5:36814105-36814164	GO:0005739|GO:0008150|GO:0006457|GO:0005759|GO:0051087|GO:0051082|GO:0042803|GO:0000774	NM_024478
A_51_P122740	11.223297	P	11.347592	P	0.9174522639423	    72144	Slc37a3	Mus musculus solute carrier family 37 (glycerol-3-phosphate transporter)	 member 3 (Slc37a3)	 mRNA [NM_028123]	solute carrier family 37 (glycerol-3-phosphate transporter)	 member 3	Mm.482167	 39286149	chr6	 39286090	-	mm|6qB1	NM_028123	chr6:39286149-39286090	GO:0008150|GO:0003674|GO:0016020|GO:0006810|GO:0008643|GO:0016021|GO:0005575|GO:0055085	NM_028123
A_51_P122752	17.546627	P	18.31963	P	0.585198103850783	NA		Mus musculus mRNA for immunoglobulin heavy chain (IGH gene). [X87228]		Mm.342177	114567196	chr12	114567137	-	mm|12qF1	X87228	chr12:114567196-114567137
A_51_P122762	1.9626826	A	1.9653223	A	0.998171972269195	    72701	Zfp618	zinc fingerprotein 618 [Source:MGI Symbol;Acc:MGI:1919950] [ENSMUST00000107415]	zinc fingerprotein 618	Mm.26479	 62800035	chr4	 62799976	+	mm|4qB3	D10920	chr4:62799976-62800035	GO:0005622|GO:0008150|GO:0003674|GO:0006355|GO:0008270|GO:0005634|GO:0005575|GO:0003676|GO:0003677|GO:0046872|GO:0006351
A_51_P122769	13.202732	P	13.302334	P	0.933290425261233	    18045	Nfyb	Mus musculus nuclear transcription factor-Y beta (Nfyb)	 mRNA [NM_010914]	nuclear transcription factor-Y beta	Mm.245998	 82213062	chr10	 82213003	-	mm|10qC1	NM_010914	chr10:82213062-82213003	GO:0043565|GO:0005622|GO:0005667|GO:0006355|GO:0016602|GO:0003700|GO:0070491|GO:0005634|GO:0045893|GO:0003677|GO:0006351	NM_010914
A_51_P122821	4.0608716	P	4.498246	P	0.73847736148298	NA					 85219385	chr2	 85219326	-	mm|2qD		chr2:085219385-085219326
A_51_P122825	10.154748	P	9.9232645	P	1.17404157673139	    18293	Ogdh	Mus musculus oxoglutarate dehydrogenase (lipoamide) (Ogdh)	 nuclear gene encoding mitochondrial protein	 mRNA [NM_010956]	oxoglutarate dehydrogenase (lipoamide)	Mm.485015	  6255358	chr11	  6255299	+	mm|11qA1	NM_010956	chr11:6255299-6255358	GO:0006099|GO:0051087|GO:0016624|GO:0030976|GO:0004591|GO:0006096|GO:0006734|GO:0005739|GO:0006104|GO:0031072|GO:0006103|GO:0008152|GO:0016491|GO:0045252|GO:0034602|GO:0055114	NM_010956
A_51_P122845	10.06072	P	10.207447	P	0.903297424211493	    72117	Naa50	Mus musculus N(alpha)-acetyltransferase 50	 NatE catalytic subunit (Naa50)	 mRNA [NM_028108]	N(alpha)-acetyltransferase 50	 NatE catalytic subunit	Mm.278726	 44163457	chr16	 44163398	+	mm|16qB4	NM_028108	chr16:44163398-44163457	GO:0005515|GO:0005737|GO:0008080|GO:0008152|GO:0016740|GO:0008415|GO:0006474	NM_028108
A_51_P122855	3.2026308	A	3.1731615	A	1.02063661219177	    18507	Pax5	Mus musculus paired box gene 5 (Pax5)	 mRNA [NM_008782]	paired box gene 5	Mm.439659	 44582908	chr4	 44550354	-	mm|4qB1	NM_008782	chr4:44582908-44550354	GO:0005515|GO:0005667|GO:0006355|GO:0003700|GO:0005634|GO:0007275|GO:0000122|GO:0007283|GO:0003677|GO:0006351|GO:0030154|GO:0007399|GO:0051573|GO:0009887|GO:0045893|GO:0045892	NM_008782
A_51_P122867	8.106795	P	4.598886	P	11.3759017112155	   238266	Syt16	Mus musculus synaptotagmin XVI (Syt16)	 mRNA [NM_172804]	synaptotagmin XVI	Mm.311393	 75368182	chr12	 75368123	+	mm|12qC3	NM_172804	chr12:75368123-75368182	GO:0005544|GO:0005515|GO:0008150|GO:0005543|GO:0046982|GO:0016021|GO:0042803	NM_172804
[truncated: 14,949,597 more chars]
